# Supplementary material for: A chemoselective electrochemical birch carboxylation of pyridines
Source: Royal Society of Chemistry journal article supplement (doi:10.1039/d4gc05976j), 2025-01-01

## A Chemoselective Electrochemical Birch Carboxylation of Pyridines

### Supporting Information

Soumik Sarkar, Rohit, Michael W. Meanwell\*

Department of Chemistry, University of Alberta, Edmonton, Canada

\*[meanwell@ualberta.ca](mailto:meanwell@ualberta.ca)

|                                                        |            |
|--------------------------------------------------------|------------|
| Table of Contents                                      | S1         |
| General Considerations                                 | S2         |
| Preparation and characterization of starting materials | S3 – S22   |
| General procedures                                     | S23 – S25  |
| Optimization                                           | S26 – S28  |
| Characterization of compounds                          | S29 – S54  |
| Deuterium labelling experiment                         | S55 – S56  |
| Cyclic voltammetry studies                             | S57 – S58  |
| Reactions of <i>N</i> -oxides                          | S58 – S59  |
| Scale-Up                                               | S60 – S61  |
| References                                             | S61        |
| NMR spectra of all compounds                           | S62 – S178 |

## **General Considerations**

All reactions described were performed at ambient temperature and atmosphere unless otherwise specified. Column chromatography was carried out with 230-400 mesh silica gel (E. Merck, Silica Gel 60). Concentration and removal of trace solvents was done via an IKA rotary evaporator using an IKA RC2 Green Basic circulating cooler and an IKA VacStar pump. Electrochemical reactions were carried on IKA's ElectraSyn 2.0 instrument. Any trace solvents remaining were accounted for in yield calculations. Electrodes were cleaned and polished with sand paper before every reaction.

Nuclear magnetic resonance (NMR) spectra were recorded using deuteriochloroform ( $\text{CDCl}_3$ ), deuteromethanol ( $\text{CD}_3\text{OD}$ ), or deuterioacetone (acetone- $\text{d}_6$ ) as the solvent. Signal positions ( $\delta$ ) are given in parts per million from tetramethylsilane ( $\delta$  0) and were measured relative to the signal of the solvent ( $^1\text{H}$  NMR:  $\text{CDCl}_3$ :  $\delta$  7.26; MeOD:  $\delta$  3.31; acetone- $\text{d}_6$ : 2.04;  $^{13}\text{C}$  NMR:  $\text{CDCl}_3$ :  $\delta$  77.16; acetone- $\text{d}_6$ : 29.84; MeOD: 49.00). Coupling constants ( $J$  values) are given in Hertz (Hz) and are reported to the nearest 0.1 Hz.  $^1\text{H}$  NMR spectral data are tabulated in the order: multiplicity (*s*, singlet; *d*, doublet; *t*, triplet; *q*, quartet; *sept*, septet; *m*, multiplet; *br* broad), coupling constants, number of protons. NMR spectra were recorded on either 400, 500, 600, or 700 MHz spectrometers. 2D NMR experiments such as COSY, HSQC, HMBC, and ROESY were used where necessary

High-resolution mass spectra were recorded using either electron impact (EI), electrospray ionization (ESI) or DART techniques by the mass spec lab at the University of Alberta

## Preparation and Characterization of Starting Materials

### General procedure 1 (GP-1): Synthesis of 4-aryl pyridines

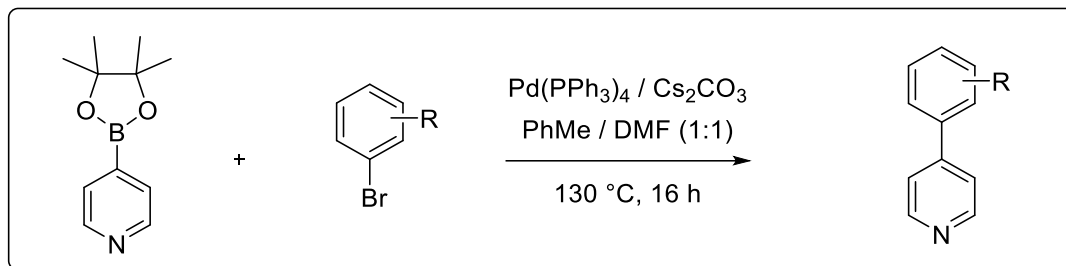

4-pyridineboronic acid pinacol ester (1.2 equiv), bromoarene (1 equiv), and Cs<sub>2</sub>CO<sub>3</sub> (6.0 equiv) were added to a 1:1 mixture of dry toluene / DMF (0.1 M) which was degassed with argon for 30 min. Subsequently, Pd(PPh<sub>3</sub>)<sub>4</sub> (0.1 equiv) was added and the mixture was left to stir at 130 °C for 16h. Upon completion, as monitored by TLC analysis, the reaction mixture was cooled to room temperature, filtered through celite, and washed with EtOAc. The organic layers were combined and concentrated under reduced pressure. The crude reaction mixture was re-dissolved in ethyl acetate and washed with water, separated, dried over Na<sub>2</sub>SO<sub>4</sub>, and concentrated. The crude reaction mixture was then purified using flash chromatography to afford 4-aryl pyridines. If impurities were still present, the purified products were recrystallized in ethyl acetate as noted.

### Synthesis of S1

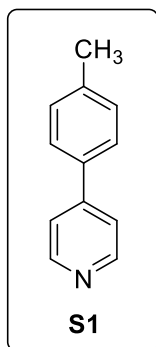

Following GP-1 the compound was synthesized using 4-pyridineboronic acid pinacol ester (1.43 g, 7.00 mmol), 4-Bromo toluene (1.00 g, 5.80 mmol), Cs<sub>2</sub>CO<sub>3</sub> (12.0 g, 34.8 mmol), Pd(PPh<sub>3</sub>)<sub>4</sub> (0.670 g, 0.600 mmol) in toluene / DMF (60.0 mL) and purified with flash chromatography (30% EtOAc / hexanes) to afford **S1** as a white solid (0.790 g, 80% yield).

Spectroscopic data was consistent with reported data<sup>1</sup>.

### Synthesis of S2

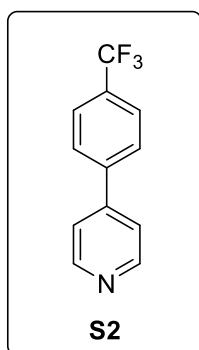

Following GP-1 the compound was synthesized using 4-pyridineboronic acid pinacol ester (1.10 g, 5.40 mmol), 1-bromo-4-trifluoromethyl-benzene (1.00 g, 4.50 mmol), Cs<sub>2</sub>CO<sub>3</sub> (8.76 g, 26.90 mmol), Pd(PPh<sub>3</sub>)<sub>4</sub> (0.510 g, 0.450 mmol) in toluene / DMF (45.0 mL) and purified using flash chromatography (30% EtOAc / hexanes) to afford **S2** as a colourless oil (0.690 g, 70% yield).

Spectroscopic data was consistent with reported data<sup>1</sup>.

### Synthesis of S3

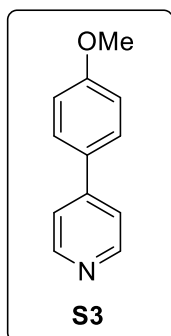

Following GP-1 the compound was synthesized using 4-pyridineboronic acid pinacol ester (0.820 g, 4.00 mmol), 1-bromo-4-methoxy-benzene (0.500 g, 2.67 mmol), Cs<sub>2</sub>CO<sub>3</sub> (5.20 g, 16.0 mmol), Pd(PPh<sub>3</sub>)<sub>4</sub> (0.300 g, 0.267 mmol) in toluene / DMF (26.0 mL) and purified using flash chromatography (30% EtOAc / hexanes) to afford **S3** as a white solid (0.370 g, 75% yield).

Spectroscopic data was consistent with reported data<sup>1</sup>.

## Synthesis of S4

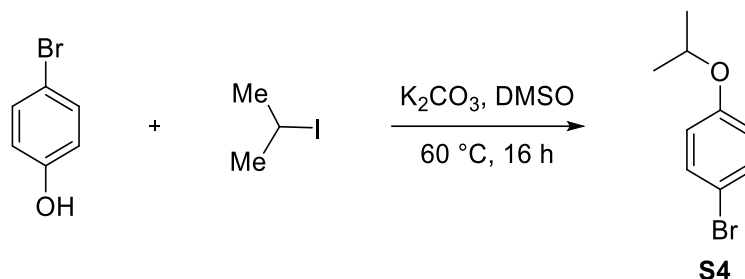

To a round-bottom flask equipped with a stir bar was added 4-bromophenol (1.00 g, 5.80 mmol, 1.00 equiv), potassium carbonate (1.17 g, 8.70 mmol, 1.50 equiv), DMSO (3.00 mL), and 2-iodopropane (0.700 mL, 6.90 mmol, 1.20 equiv) and the reaction mixture was stirred at  $60\text{ }^\circ\text{C}$  for 16 h. Upon completion, as monitored by TLC analysis, the reaction mixture was quenched with water and extracted with EtOAc. The organic layers were combined, washed with brine, dried with  $Na_2SO_4$ , filtered, and concentrated under reduced pressure. The crude product was then purified with flash chromatography (5% EtOAc / hexanes) to afford **S4** as a colourless oil (0.710 g, 3.30 mmol, 58% yield).

Spectroscopic data was consistent with reported data<sup>2</sup>.

## Synthesis of S5

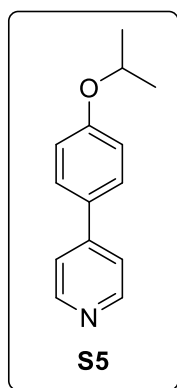

Following GP-1 the compound was synthesized using 4-pyridineboronic acid pinacol ester (1.00 g, 4.88 mmol), **S4** (0.70 g, 3.25 mmol),  $Cs_2CO_3$  (6.40 g, 19.5 mmol),  $Pd(PPh_3)_4$  (0.370 g, 0.320 mmol) in toluene / DMF (32.0 mL) and purified using flash chromatography (40% EtOAc / hexanes) to afford **S5** as a white solid (0.620 g, 90%).

$^1H$  NMR (400 MHz,  $CDCl_3$ )  $\delta$  8.61 (dd,  $J = 4.5, 1.6$  Hz, 2H), 7.65 – 7.52 (m, 2H), 7.46 (dd,  $J = 4.5, 1.7$  Hz, 2H), 6.98 (d,  $J = 8.8$  Hz, 2H), 4.61 (m), 1.37 (d,  $J = 6.1$  Hz, 6H).

$^{13}\text{C}$  NMR (126 MHz,  $\text{CDCl}_3$ )  $\delta$  158.93, 150.21, 147.85, 130.03, 128.15, 121.01, 116.26, 70.04, 22.03.

HRMS (ESI): Expected mass  $[\text{M}+\text{H}^+]$ : 214.1226; found: 214.1126.

Melting point = 53 – 56 °C

### Synthesis of S6

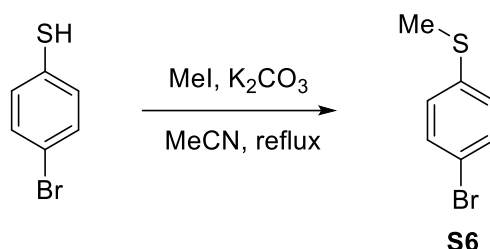

To a solution of 4-bromo-benzenethiol (1.02 g, 5.40 mmol, 1.00 equiv) in dry MeCN (15.0 mL), was added iodomethane (0.600 mL, 10.8 mmol, 2.00 equiv) and  $\text{K}_2\text{CO}_3$  (1.50 g, 10.8 mmol, 2.00 equiv). The reaction mixture was kept under reflux for 12 h. Upon completion, as monitored by TLC analysis, the reaction mixture was cooled to room temperature and concentrated under reduced pressure. The crude reaction mixture was re-dissolved in EtOAc, washed with water, separated, dried over  $\text{Na}_2\text{SO}_4$ , filtered, and concentrated under reduced pressure to afford **S6** as a colourless oil (0.90 g, 4.6 mmol, 84% yield)

Spectroscopic data was consistent with reported data<sup>3</sup>.

### Synthesis of S7

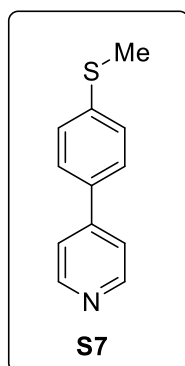

Following GP-1 the compound was synthesized using 4-pyridineboronic acid pinacol ester (1.43 g, 6.96 mmol), **S6** (0.940 g, 4.65 mmol),  $\text{Cs}_2\text{CO}_3$  (9.10 g, 27.9 mmol),  $\text{Pd}(\text{PPh}_3)_4$  (0.540 g, 0.470 mmol) in toluene / DMF (60.0 mL) and purified using flash chromatography (30% EtOAc / hexanes) to afford **S7** as a white solid (0.580 g, 63% yield)

Spectroscopic data was consistent with reported data<sup>4</sup>.

### Synthesis of S8

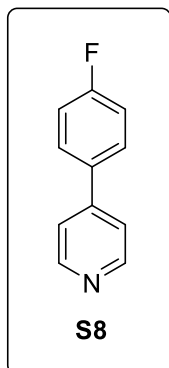

Following GP-1 the compound was synthesized using 4-pyridineboronic acid pinacol ester (0.880 g, 4.30 mmol), 1-bromo-4-fluoro-benzene (0.500 g, 2.85 mmol), Cs<sub>2</sub>CO<sub>3</sub> (5.60 g, 17.2 mmol), Pd(PPh<sub>3</sub>)<sub>4</sub> (0.330 g, 0.280 mmol) in toluene / DMF (30.0 mL) and purified using flash chromatography (30% EtOAc / hexanes) to afford the title compound as a yellow oil (0.430 g, 87% yield).

Spectroscopic data was consistent with reported data<sup>5</sup>.

### Synthesis of S9

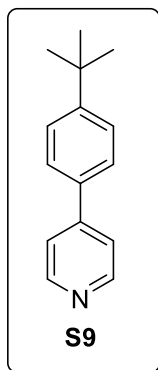

Following GP-1 the compound was synthesized using 4-pyridineboronic acid pinacol ester (1.40 g, 7.04 mmol), 1-bromo-4-*tert*-butyl-benzene (1.00 g, 4.69 mmol), Cs<sub>2</sub>CO<sub>3</sub> (10.0 g, 42.2 mmol), Pd(PPh<sub>3</sub>)<sub>4</sub> (0.540 g, 0.704 mmol) in toluene / DMF (60.0 mL) and purified using flash chromatography (30% EtOAc / hexanes) to afford **S9** as a white solid (0.570 g, 57% yield).

Spectroscopic data was consistent with reported data<sup>1</sup>.

### Synthesis of S10

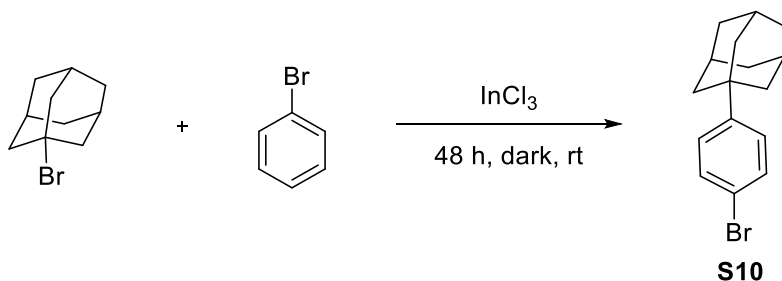

To a round-bottom flask equipped with a stir bar was added 1-bromoadamantane (2.00 g, 9.29 mmol, 1.00 equiv), InCl<sub>3</sub> (0.160 g, 0.460 mmol, 0.050 equiv). Bromobenzene (24.0 mL) was then

added and the reaction mixture was left to stir at room temperature for 48 h in the dark. Upon completion, the reaction mixture was concentrated under reduced pressure. The resulting crude reaction mixture was dissolved in 30 mL hexanes washed with saturated NaHCO<sub>3</sub> (2x 30 mL) and brine. The organic layer was then separated, dried over anhydrous Na<sub>2</sub>SO<sub>4</sub>, filtered, and concentrated under reduced pressure. Purification of the crude reaction mixture by silica column chromatography (hexanes, 100%) afforded **S10** (1.46 g, 6.87 mmol) in 74% yield as a white solid.

Spectroscopic data was consistent with reported data<sup>6</sup>.

### Synthesis of S11

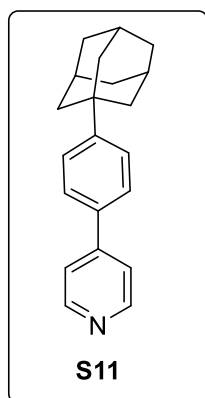

Following GP-1 the compound was synthesized using 4-pyridineboronic acid pinacol ester (0.530 g, 2.58 mmol), 1-(4-bromo-phenyl)-adamantane (0.500 g, 1.72 mmol), Cs<sub>2</sub>CO<sub>3</sub> (3.40 g, 10.3 mmol), Pd(PPh<sub>3</sub>)<sub>4</sub> (0.200 g, 0.172 mmol) in toluene / DMF (17.0 mL) and purified with flash chromatography (30% EtOAc / hexanes) to afford **S11** as a white solid (0.270 g, 55% yield).

<sup>1</sup>H NMR (400 MHz, CDCl<sub>3</sub>) δ 8.64 (d, *J* = 5.9 Hz, 2H), 7.61 (d, *J* = 8.3 Hz, 2H), 7.49 (t, *J* = 6.6 Hz, 4H), 2.13 (s, 3H), 1.96 (d, *J* = 2.0 Hz, 6H), 1.86 – 1.74 (m, 6H).

<sup>13</sup>C NMR (126 MHz, CDCl<sub>3</sub>) δ 152.60, 150.23, 148.18, 135.21, 126.71, 125.71, 121.45, 43.13, 36.76, 36.29, 28.92

HRMS (ESI): Expected mass [M+H<sup>+</sup>]: 290.1903; found: 290.1903

Melting point = 110 – 113 °C

### Synthesis of S12

Following GP-1 the compound was synthesized using 4-pyridineboronic acid pinacol ester (1.13 g, 5.52 mmol), 1-bromo-3,5-dimethoxy-benzene (1.00 g, 4.60 mmol), Cs<sub>2</sub>CO<sub>3</sub> (9.00 g, 27.6 mmol), Pd(PPh<sub>3</sub>)<sub>4</sub> (0.530 g, 0.460 mmol) in toluene / DMF (46.0 mL) and purified using flash



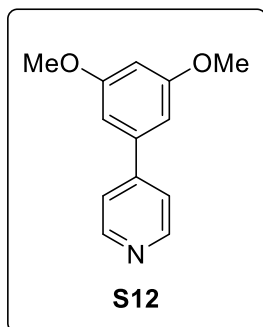

chromatography (30% EtOAc / hexanes) as eluent to afford **S12** as a white solid (0.670 g, 67% yield).

**<sup>1</sup>H NMR** (400 MHz, CDCl<sub>3</sub>) δ 8.67 – 8.62 (m, 2H), 7.50 – 7.45 (m, 2H), 6.75 (d, *J* = 2.2 Hz, 2H), 6.54 (t, *J* = 2.1 Hz, 1H), 3.85 (s, 6H).

**<sup>13</sup>C NMR** (126 MHz, CDCl<sub>3</sub>) δ 161.35, 150.25, 148.35, 140.37, 121.74,

105.32, 100.76, 55.51.

HRMS (ESI): Expected mass [M+H<sup>+</sup>]: 216.1019; found: 216.1018

Melting point = 53 °C

### Synthesis of S13

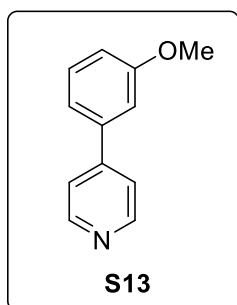

Following GP-1 the compound was synthesized using pyridylboronic pinacol ester (2.60 g, 13.1 mmol), 1-bromo-3-methoxy-benzene (2.00 g, 10.9 mmol), Cs<sub>2</sub>CO<sub>3</sub> (20.00 g, 65.5 mmol), Pd(PPh<sub>3</sub>)<sub>4</sub> (1.20 g, 1.09 mmol) in toluene / DMF (110 mL) and purified using flash chromatography (30% EtOAc / hexanes) to afford **S13** as a colourless oil (1.50 g, 76% yield)

Spectroscopic data was consistent with reported data<sup>1</sup>.

### Synthesis of S14

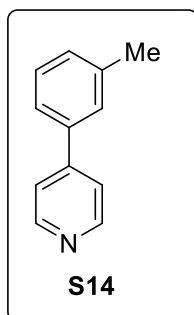

Following GP-1 the compound was synthesized using 4-pyridineboronic acid pinacol ester (1.90 g, 9.30 mmol), 1-bromo-3-methyl-benzene (1.00 g, 6.20 mmol), Cs<sub>2</sub>CO<sub>3</sub> (12.0 g, 37.2 mmol), Pd(PPh<sub>3</sub>)<sub>4</sub> (0.720 g, 0.620 mmol) in toluene / DMF (60.0 mL) and purified using flash chromatography (30% EtOAc / hexanes) to afford **S14** as a colourless oil (0.760 g, 77% yield)

Spectroscopic data was consistent with reported data<sup>1</sup>.

## Synthesis of S15

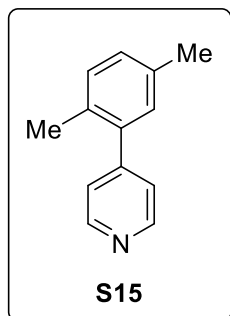

Following GP-1 the compound was synthesized using pyridylboronic pinacol ester (1.40 g, 6.48 mmol), 2-bromo-1,4-dimethyl-benzene (1.00 g, 5.40 mmol), Cs<sub>2</sub>CO<sub>3</sub> (11.00 g, 32.40 mmol), Pd(PPh<sub>3</sub>)<sub>4</sub> (0.620 g, 0.540 mmol) in toluene / DMF (54.0 mL) and purified using flash chromatography (30% EtOAc / hexanes) as eluent to afford **S15** as a yellow oil (0.942 g, 95% yield)

**<sup>1</sup>H NMR** (400 MHz, CDCl<sub>3</sub>) δ 8.62 (dd, *J* = 4.4, 1.7 Hz, 2H), 7.21 (dd, *J* = 4.4, 1.7 Hz, 2H), 7.16 (d, *J* = 7.8 Hz, 1H), 7.10 (dd, *J* = 7.9, 1.4 Hz, 1H), 7.01 (s, 1H), 2.33 (s, 3H), 2.21 (s, 3H).

**<sup>13</sup>C NMR** (126 MHz, CDCl<sub>3</sub>) δ 149.90, 149.60, 138.93, 135.59, 131.80, 130.63, 129.93, 129.10, 124.23, 20.89, 19.75

HRMS (ESI): Expected mass [M+H<sup>+</sup>]: 183.112; found: 183.1121

## Synthesis of S16

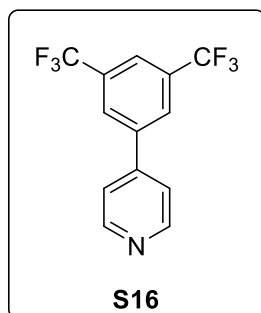

Following GP-1 the compound was synthesized using pyridylboronic pinacol ester (0.43 g, 2.10 mmol), 1-bromo-3,5-bis-trifluoromethyl-benzene (0.500 g, 1.71 mmol), Cs<sub>2</sub>CO<sub>3</sub> (3.40 g, 10.23 mmol), Pd(PPh<sub>3</sub>)<sub>4</sub> (0.200 g, 0.171 mmol) in toluene / DMF (17.0 mL) and purified using flash chromatography (30% EtOAc / hexanes) to afford **S16** as a white solid (0.265 g, 54% yield)

**<sup>1</sup>H NMR** (600 MHz, CDCl<sub>3</sub>) δ 8.76 (d, *J* = 5.7 Hz, 2H), 8.05 (s, 2H), 7.95 (s, 1H), 7.53 (dd, *J* = 4.5, 1.6 Hz, 2H).

**<sup>13</sup>C NMR** (126 MHz, CDCl<sub>3</sub>) δ 150.8, 145.3, 140.48, 132.67 (q, *J* = 33.58 Hz), 127.21, 123.10 (q, *J* = 272.88 Hz), 122.65 (m), 121.59.

HRMS (ESI): Expected mass [M+H<sup>+</sup>]: 292.0555; found: 292.0555

Melting point = 109 – 111 °C

## Synthesis of S17

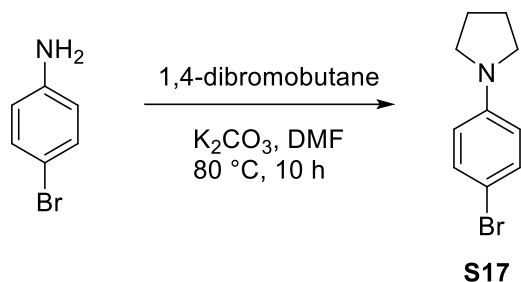

To a suspension of 4-bromo-phenylamine (1.00 g, 5.74 mmol, 1.00 equiv) in DMF (6.00 mL) was added  $\text{K}_2\text{CO}_3$  (0.870 g, 6.30 mmol, 1.10 equiv) The reaction mixture was then degassed with argon for 15 mins. 1,4-dibromobutane (0.750 mL, 6.30 mmol, 1.10 equiv) was added to the suspension and the reaction mixture was left to stir at 80 °C for 10 h. After completion, the reaction was cooled to room temperature and diluted with EtOAc and water. The organic layer was separated and washed with 1M HCl. The acid layers were combined and the pH was adjusted to 8 by adding 1M NaOH and then extracted with EtOAc. The organic layers were combined, dried with  $\text{Na}_2\text{SO}_4$  and concentrated under reduced pressure. The crude product was purified with flash chromatography (100% hexanes) to obtain **S17** as a white solid (0.700 g, 3.12 mmol, 53% yield).

Spectroscopic data was consistent with reported data<sup>7</sup>.

## Synthesis of S18

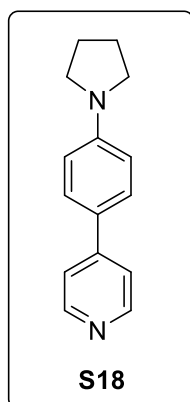

Following GP-1 the compound was synthesized using pyridylboronic pinacol ester (0.270 g, 1.34 mmol, 1.50 equiv), **S17** (0.200 g, 0.900 mmol, 1.00 equiv),  $\text{Cs}_2\text{CO}_3$  (1.74 g, 5.34 mmol, 6.00 equiv),  $\text{Pd}(\text{PPh}_3)_4$  (0.104 g, 0.090 mmol, 10 mol%) in toluene / DMF (16.0 mL) and purified using flash chromatography (30% EtOAc / hexanes) to afford **S18** as a light yellow solid (0.054 g, 27% yield).

**<sup>1</sup>H NMR** (700 MHz, CDCl<sub>3</sub>) δ 8.59 – 8.45 (m, 2H), 7.61 – 7.50 (m, 2H), 7.46 (dd, *J* = 4.6, 1.6 Hz, 2H), 6.69 – 6.55 (m, 2H), 3.41 – 3.28 (m, 4H), 2.09 – 1.94 (m, 4H).

**<sup>13</sup>C NMR** (176 MHz, CDCl<sub>3</sub>) δ 149.99, 148.53, 148.21, 127.65, 124.07, 120.12, 111.95, 47.56, 25.47.

HRMS (ESI): Expected mass [M+H<sup>+</sup>]: 225.1386; found: 225.1383

Melting point = 73 – 74 °C

### Synthesis of S19

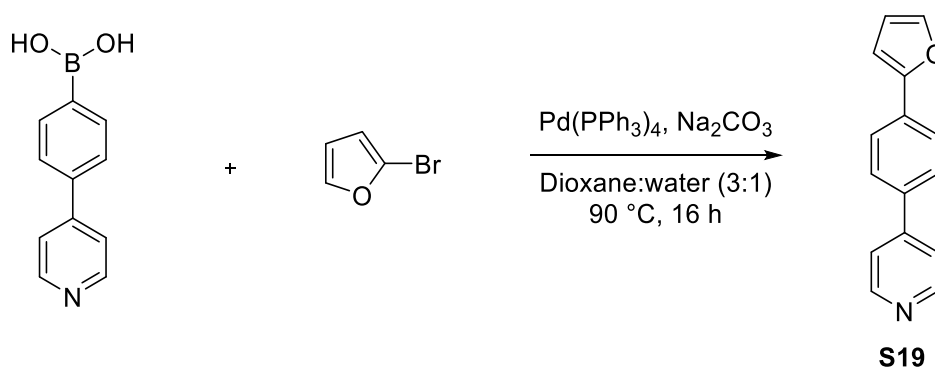

A solution of 4-(pyridin-4-yl)phenyl boronic acid (0.200 g, 2.04 mmol, 1.50 equiv) in dioxane (12.0 mL) and water (4.00 mL) was degassed for 15 mins. To the solution was added 2-bromofuran (0.200 g, 1.36 mmol, 1.00 equiv), Pd(PPh<sub>3</sub>)<sub>4</sub> (0.080 g, 0.060 mmol, 0.050 equiv) and Na<sub>2</sub>CO<sub>3</sub> (0.4300 g, 4.08 mmol, 3.00 equiv) and left to stir at 90 °C for 16 h. On completion, the reaction was quenched with water and extracted with EtOAc. The combined organic layers were dried with Na<sub>2</sub>SO<sub>4</sub> and evaporated under reduced pressure to afford **S19** as a light-yellow solid (0.250 g, 1.13 mmol, 83% yield)

**<sup>1</sup>H NMR** (400 MHz, CDCl<sub>3</sub>) δ 8.65 (dd, *J* = 4.5, 1.6 Hz, 2H), 7.78 – 7.74 (m, 2H), 7.67 – 7.63 (m, 2H), 7.51 – 7.49 (m, 3H), 6.72 (dd, *J* = 3.4, 0.5 Hz, 1H), 6.50 (dd, *J* = 3.4, 1.8 Hz, 1H).

**<sup>13</sup>C NMR** (126 MHz, CDCl<sub>3</sub>) δ 153.23, 150.32, 147.62, 142.63, 136.63, 131.56, 127.27, 124.39, 121.26, 111.91, 106.02

HRMS (ESI): Expected mass [M+H<sup>+</sup>]: 222.0913; found: 222.0913

Melting point = 167 °C

### Synthesis of S20

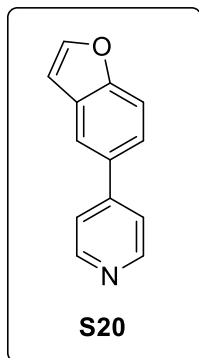

Following GP-1 the compound was synthesized using 4-pyridineboronic acid pinacol ester (1.26 g, 6.1 mmol), 5-bromo-benzofuran (1.00 g, 5.10 mmol), Cs<sub>2</sub>CO<sub>3</sub> (10.0 g, 30.6 mmol), Pd(PPh<sub>3</sub>)<sub>4</sub> (0.5900 g, 0.510 mmol) in toluene / DMF (60.0 mL) and purified using flash chromatography (30% EtOAc / hexanes) as eluent to afford **S20** as a white solid (0.770 g, 78%).

<sup>1</sup>H NMR (400 MHz, CDCl<sub>3</sub>) δ 8.66 (dd, *J* = 4.5, 1.6 Hz, 2H), 7.87 (dd, *J* = 1.8, 0.6 Hz, 1H), 7.69 (d, *J* = 2.2 Hz, 1H), 7.63 – 7.60 (m, 1H), 7.57 (dd, *J* = 8.6, 1.8 Hz, 1H), 7.54 (dd, *J* = 4.5, 1.7 Hz, 2H), 6.85 (dd, *J* = 2.2, 0.8 Hz, 1H).

<sup>13</sup>C NMR (126 MHz, CDCl<sub>3</sub>) δ 155.42, 150.25, 148.79, 146.07, 133.33, 128.27, 123.58, 121.93, 119.91, 112.03, 106.84

HRMS (ESI): Expected mass [M+H<sup>+</sup>]: 196.0757; found: 196.0757

Melting point = 83 – 85 °C

### Synthesis of S21

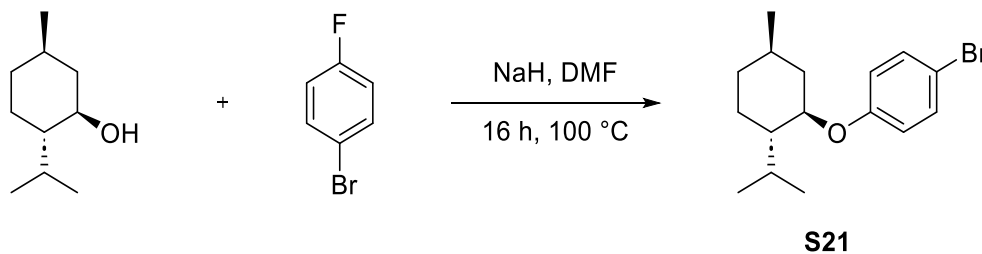

To a solution of (L)-menthol (0.200 g, 1.26 mmol, 1.10 equiv), in DMF (2.00 mL), was added NaH (0.110 g of a 60% w/w dispersion in mineral oil, 2.80 mmol, 2.00 equiv) and left to stir for 30 mins at rt. 1-bromo-4-fluorobenzene (0.130 mL, 1.40 mmol, 1.20 equiv) was added to the mixture and left to stir at 100 °C for 16 h. On completion, the reaction was quenched with saturated NH<sub>4</sub>Cl solution and extracted with EtOAc. The organic layers were combined and dried with Na<sub>2</sub>SO<sub>4</sub> and

evaporated under reduced pressure to get the crude product which was purified using flash chromatography (100% hexanes) to afford **S21** as a colourless oil (0.300 g, 76% yield).

Spectroscopic data was consistent with reported data<sup>2</sup>.

### Synthesis of S22

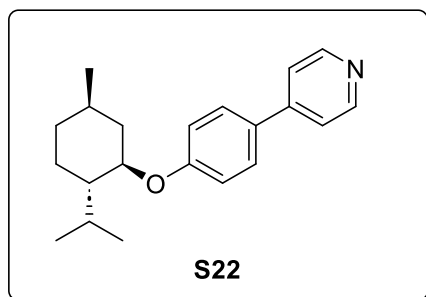

Following GP-1 the compound was synthesized using 4-pyridineboronic acid pinacol ester (0.99 g, 4.80 mmol), **S22** (1.00 g, 3.30 mmol), Cs<sub>2</sub>CO<sub>3</sub> (6.30 g, 19.3 mmol), Pd(PPh<sub>3</sub>)<sub>4</sub> (0.380 g, 0.330 mmol) in toluene / DMF (60.0 mL) and purified using flash chromatography (30% EtOAc / hexanes) to afford **S22** as a white solid (0.840 g, 85% yield).

<sup>1</sup>H NMR (600 MHz, CDCl<sub>3</sub>) δ 8.61 (dd, *J* = 4.5, 1.6 Hz, 2H), 7.63 – 7.49 (m, 2H), 7.46 (dd, *J* = 4.5, 1.7 Hz, 2H), 7.09 – 6.79 (m, 2H), 4.11 (m, 1H), 2.34 – 2.05 (m, 2H), 1.83 – 1.68 (m, 2H), 1.61 – 1.38 (m, 2H), 1.19 – 0.95 (m, 3H), 0.94 (dd, *J* = 6.8, 1.9 Hz, 6H), 0.79 (d, *J* = 7.0 Hz, 3H).

<sup>13</sup>C NMR (126 MHz, CDCl<sub>3</sub>) δ 159.44, 150.20, 147.89, 129.95, 128.21, 121.00, 116.13, 48.04, 40.24, 34.49, 31.46, 26.20, 23.81, 22.15, 20.74, 16.68

HRMS (ESI): Expected mass [M+H<sup>+</sup>]: 310.2165; found: 310.2163

Melting point = 139 – 140 °C

### Synthesis of S23

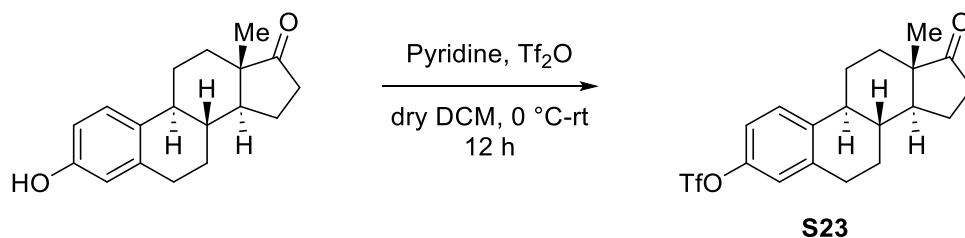

To a solution of estrone (1.00 g, 3.70 mmol, 1.00 equiv) in dry DCM, pyridine (0.900 mL, 11.1 mmol, 3.00 equiv) was added at 0 °C. The resulting solution was left to stir at 0 °C for 30 mins under argon atmosphere. Trifluoromethanesulfonic anhydride (0.740 mL, 4.400 mmol, 1.20 equiv) was

added dropwise into the solution and the solution was warmed to rt and left to stir for 12 h. Upon completion, as monitored by TLC, the reaction was quenched with water and extracted with Et<sub>2</sub>O. The organic layers were combined, dried with Na<sub>2</sub>SO<sub>4</sub>, filtered, and evaporated under reduced pressure to obtain the crude product which was purified using flash chromatography (10% EtOAc / hexanes) to afford **S23** as a white solid (0.980 g, 65% yield).

Spectroscopic data was consistent with reported data<sup>8</sup>.

### Synthesis of **S24**

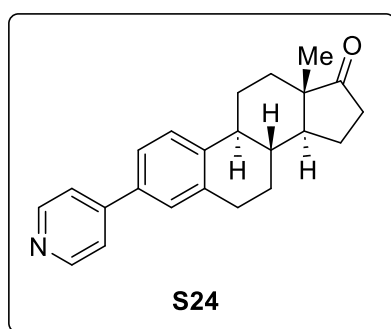

Following GP-1 the compound was synthesized using 4-pyridineboronic acid pinacol ester (0.920 g, 4.50 mmol), **S23** (1.50 g, 3.74 mmol), Cs<sub>2</sub>CO<sub>3</sub> (7.30 g, 22.4 mmol), Pd(PPh<sub>3</sub>)<sub>4</sub> (0.430 g, 0.374 mmol) in toluene / DMF (60.0 mL) and purified using flash chromatography (50% EtOAc / hexanes) to afford **S24** as a white solid (0.980 g, 66%).

<sup>1</sup>H NMR (400 MHz, CDCl<sub>3</sub>) δ 8.64 (d, *J* = 6.1 Hz, 2H), 7.57 – 7.33 (m, 5H), 3.09 – 2.92 (m, 2H), 2.62 – 2.29 (m, 3H), 2.25 – 1.93 (m, 4H), 1.78 – 1.38 (m, 6H), 0.93 (s, 3H).

<sup>13</sup>C NMR (126 MHz, CDCl<sub>3</sub>) δ 220.58, 150.23, 148.12, 141.02, 137.40, 135.65, 127.56, 126.23, 124.34, 121.45, 50.54, 47.97, 44.45, 38.11, 35.86, 31.62, 29.52, 26.45, 25.75, 21.63, 13.87

HRMS (ESI): Expected mass [M+H<sup>+</sup>]: 332.2009; found: 332.2008

Melting point = 201 – 203 °C

## Synthesis of S25

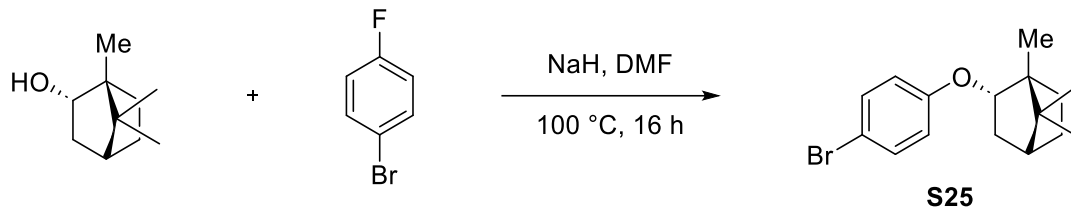

To a solution of (-)-borneol (1.00 g, 6.50 mmol, 1.10 equiv), in DMF (12.0 mL), was added NaH (0.660 g of a 60% w/w dispersion in mineral oil, 11.80 mmol, 2.00 equiv) and left to stir for 30 mins at rt. 1-bromo-4-fluorobenzene (0.640 mL, 5.90 mmol, 1.00 equiv) was added to the mixture and left to stir at 100 °C for 16 h. On completion, the reaction was quenched with saturated NH<sub>4</sub>Cl solution and extracted with EtOAc. The organic layers were combined and dried with Na<sub>2</sub>SO<sub>4</sub> and evaporated under reduced pressure to get the crude product which was purified using flash chromatography (100% hexanes) to get **S25** as a white solid (1.10 g, 62% yield).

Spectroscopic data was consistent with reported data<sup>8</sup>.

## Synthesis of S26

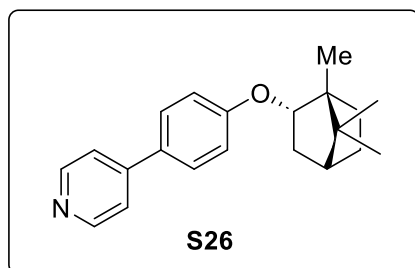

Following GP-1 the compound was synthesized using 4-pyridineboronic acid pinacol ester (0.770 g, 3.90 mmol), **S25** (1.00 g, 3.24 mmol), Cs<sub>2</sub>CO<sub>3</sub> (6.40 g, 19.4 mmol), Pd(PPh<sub>3</sub>)<sub>4</sub> (0.370 g, 0.320 mmol) in toluene / DMF (60.0 mL) and purified using flash chromatography (30% EtOAc / hexanes) as to afford **S26** as a white solid (0.650 g, 65% yield).

<sup>1</sup>H NMR (400 MHz, CDCl<sub>3</sub>) δ 8.60 (dd, *J* = 4.6, 1.5 Hz, 2H), 7.57 (d, *J* = 8.7 Hz, 2H), 7.45 (dd, *J* = 4.6, 1.5 Hz, 2H), 6.94 (d, *J* = 8.7 Hz, 2H), 4.43 – 4.33 (m, 1H), 2.52 – 2.16 (m, 2H), 1.86 – 1.69 (m, 2H), 1.44 – 1.07 (m, 3H), 1.02 – 0.87 (m, 9H)

<sup>13</sup>C NMR (126 MHz, CDCl<sub>3</sub>) δ 160.18, 150.20, 147.93, 129.80, 128.05, 121.00, 116.01, 83.11, 49.59, 47.67, 45.19, 36.83, 27.97, 26.80, 19.75, 19.00, 13.78.

HRMS (ESI): Expected mass [M+H<sup>+</sup>]: 308.2009; found: 308.2009



Melting point = 132 °C

### Synthesis of S27

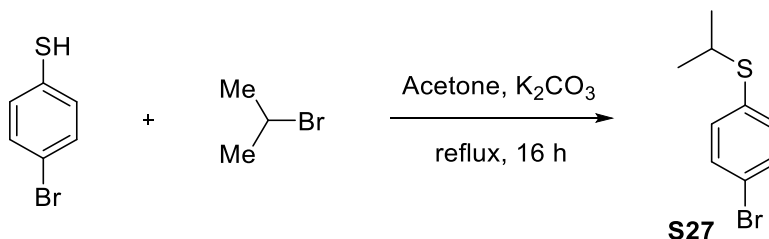

To a solution of 4-bromo-benzenethiol (1.50 g, 7.90 mmol, 1.00 equiv) in anhydrous acetone (24.0 mL) was added K<sub>2</sub>CO<sub>3</sub> (1.50 g, 11.0 mmol, 1.40 equiv) and 2-bromopropane (0.900 mL, 9.48 mmol, 1.20 equiv) under argon atmosphere. The reaction mixture was left under reflux for 16 h. After completion, the reaction mixture was cooled down and the acetone was evaporated under reduced pressure to afford crude **S27**. The crude product was dissolved in Et<sub>2</sub>O and washed with water. The combined organic layers were dried using Na<sub>2</sub>SO<sub>4</sub>, filtered, and evaporated to obtain **S27** as a colourless oil (1.63 g, 88% yield)

Spectroscopic data was consistent with reported data<sup>9</sup>.

### Synthesis of S28

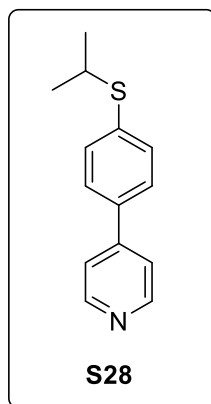

Following GP-1 the compound was synthesized using 4-pyridineboronic acid pinacol ester (1.10 g, 5.24 mmol), **S27** (1.00 g, 4.40 mmol), Cs<sub>2</sub>CO<sub>3</sub> (8.60 g, 26.2 mmol), Pd(PPh<sub>3</sub>)<sub>4</sub> (0.510 g, 0.440 mmol) in toluene / DMF (44.0 mL) and purified using flash chromatography (50% EtOAc / hexanes) to afford **S28** as a yellow solid (0.950 g, 95% yield).

<sup>1</sup>H NMR (400 MHz, CDCl<sub>3</sub>) δ 8.64 (dd, *J* = 4.5, 1.6 Hz, 2H), 7.62 – 7.51 (m, 2H), 7.53 – 7.39 (m, 4H), 3.53 – 3.38 (m, 1H), 1.34 (d, *J* = 6.7 Hz, 6H)

<sup>13</sup>C NMR (176 MHz, CDCl<sub>3</sub>) δ 150.28, 147.52, 137.60, 135.90, 131.32, 127.21, 121.24, 37.77, 23.06.

HRMS (ESI): Expected mass [M+H<sup>+</sup>]: 230.0995; found: 230.0998

Melting point = 55 °C

### Synthesis of S29

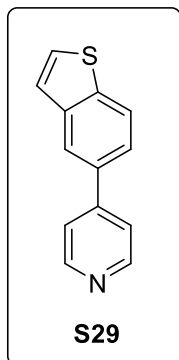

Following GP-1 the compound was synthesized using 4-pyridineboronic acid pinacol ester (1.20 g, 5.63 mmol), 5-bromo-benzo[b]thiophene (1.00 g, 4.70 mmol),  $\text{Cs}_2\text{CO}_3$  (9.20 g, 28.2 mmol),  $\text{Pd}(\text{PPh}_3)_4$  (0.540 g, 0.470 mmol) in toluene / DMF (48.0 mL) and purified using flash chromatography (50% EtOAc / hexanes) to afford **S29** as a white solid (0.940 g, 95% yield).

$^1\text{H NMR}$  (400 MHz,  $\text{CDCl}_3$ )  $\delta$  8.68 (dd,  $J = 4.5, 1.6$  Hz, 2H), 8.09 (d,  $J = 1.6$  Hz, 1H), 7.99 (d,  $J = 8.4$  Hz, 1H), 7.62 (dd,  $J = 8.4, 1.7$  Hz, 1H), 7.58 (dd,  $J = 4.5, 1.7$  Hz, 2H), 7.53 (d,  $J = 5.4$  Hz, 1H), 7.42 (dd,  $J = 5.4, 0.6$  Hz, 1H).

$^{13}\text{C NMR}$  (126 MHz,  $\text{CDCl}_3$ )  $\delta$  150.31, 148.55, 140.48, 140.28, 134.55, 127.72, 124.09, 123.20, 123.15, 122.09, 121.87.

HRMS (ESI): Expected mass  $[\text{M}+\text{H}^+]$ : 212.0527; found: 212.0528

Melting point = 123 – 127 °C

### Synthesis of S30

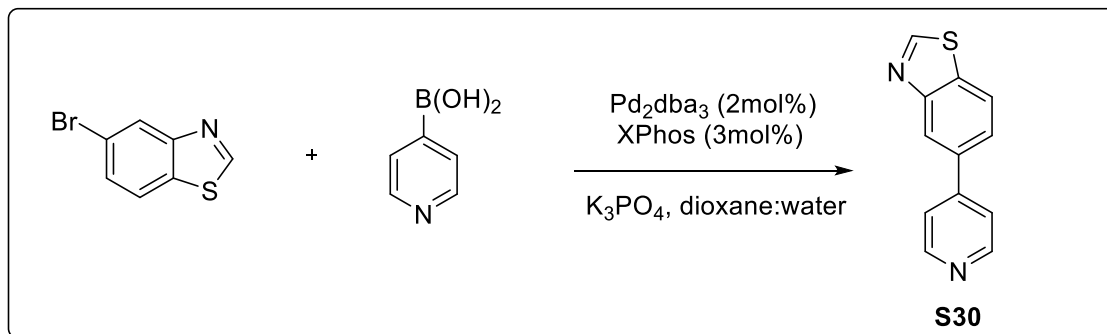

In a RB flask equipped with a stir bar was added dioxane (3.00 mL) and water (1.00 mL),  $\text{Pd}_2\text{dba}_3$  (0.090 g, 0.0093 mmol, 2 mol%) and XPhos (0.007 g, 0.0141 mmol, 3 mol%) was added to it and stir at RT for 1 h. After 1 h, 5-bromo-benzothiazole (0.100 g, 0.470 mmol, 1.00 equiv), 4-pyridineboronic acid pinacol ester (0.087 g, 0.705 mmol, 1.50 equiv), and  $\text{K}_3\text{PO}_4$  (0.200 g, 0.940

mmol, 2.00 equiv) was added to the solution and stirred at 100 °C for 12 h. After completion, reaction was cooled down, quenched with water, and extracted with EtOAc. The organic layers were combined and evaporated under vacuum to obtain crude **S30** which was purified using flash chromatography (70% EtOAc / hexanes) to afford **S30** as a white solid (0.090 g, 90% yield).

**<sup>1</sup>H NMR** (600 MHz, CDCl<sub>3</sub>) δ 9.04 (s, 1H), 8.68 (dd, *J* = 4.6, 1.4 Hz, 2H), 8.38 (d, *J* = 1.6 Hz, 1H), 8.03 (d, *J* = 8.3 Hz, 1H), 7.68 (dd, *J* = 8.3, 1.7 Hz, 1H), 7.56 (dd, *J* = 4.6, 1.6 Hz, 2H).

**<sup>13</sup>C NMR** (126 MHz, CDCl<sub>3</sub>) δ 155.18, 154.02, 150.44, 147.72, 136.67, 134.48, 124.44, 122.57, 122.01, 121.83.

HRMS (ESI): Expected mass [M+H<sup>+</sup>]: 213.0481; found: 213.0479

Melting point = 134 °C

### Preparation of **S31**

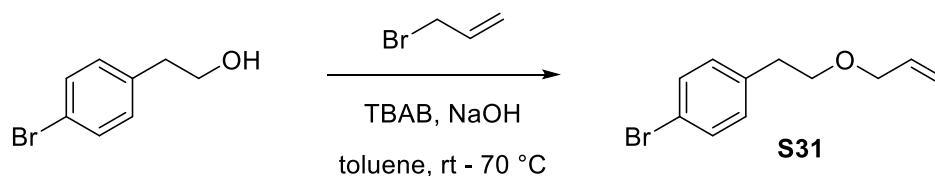

Compound was prepared by reported method<sup>10</sup>.

### Preparation of **S32**

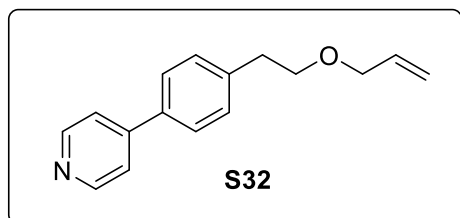

Following GP-1 the compound was synthesized using 4-pyridineboronic acid pinacol ester (1.10 g, 5.40 mmol), **S31** (1.00 g, 4.50 mmol), Cs<sub>2</sub>CO<sub>3</sub> (8.70 g, 26.7 mmol), Pd(PPh<sub>3</sub>)<sub>4</sub> (0.520 g, 0.450 mmol) in toluene / DMF (45.0 mL) and purified using flash chromatography (50% EtOAc

/ hexanes) to afford **S32** as a colourless oil (0.640 g, 65%).

**<sup>1</sup>H NMR** (400 MHz, CDCl<sub>3</sub>) δ 8.72 – 8.50 (m, 2H), 7.57 (d, *J* = 8.2 Hz, 2H), 7.49 (dd, *J* = 4.5, 1.6 Hz, 2H), 7.35 (d, *J* = 8.2 Hz, 2H), 6.03 – 5.76 (m, 1H), 5.35 – 5.08 (m, 2H), 4.01 (dt, *J* = 5.6, 1.3 Hz, 2H), 3.69 (t, *J* = 7.0 Hz, 2H), 2.96 (t, *J* = 7.0 Hz, 2H)

$^{13}\text{C}$  NMR (126 MHz,  $\text{CDCl}_3$ )  $\delta$  150.24, 148.15, 140.37, 136.03, 134.76, 129.71, 126.95, 121.47, 116.96, 71.95, 70.86, 36.07.

HRMS (ESI): Expected mass  $[\text{M}+\text{H}^+]$ : 240.1383; found: 240.138

### Preparation of S33

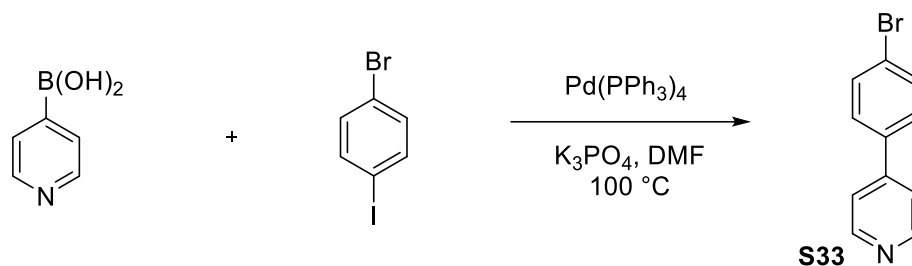

Compound was prepared by reported method<sup>11</sup>.

### Preparation of S34

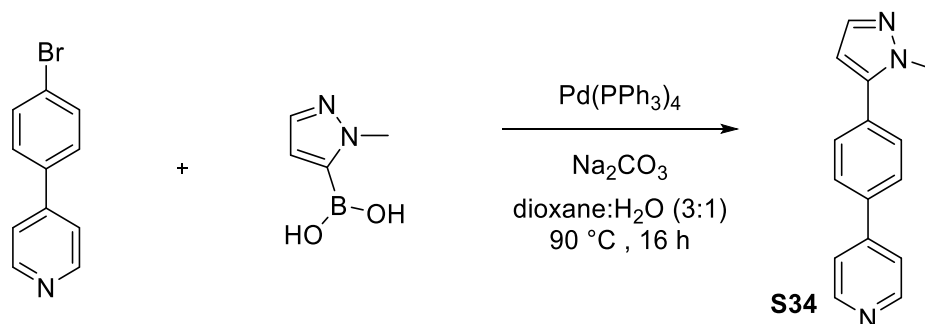

To a solution of **S33** (0.230 g, 1.00 mmol, 1.00 equiv) in dioxane:water (3:1) (8.00 mL), was added 1-Methyl-1H-pyrazole-5-boronic acid (0.190 g, 1.50 mmol, 1.50 equiv),  $\text{Na}_2\text{CO}_3$  (0.320 g, 3.00 mmol, 3.00 equiv). The reaction mixture was degassed with  $\text{N}_2$  for 15 mins and  $\text{Pd}(\text{PPh}_3)_4$  (0.060 g, 0.050 mmol, 5 mol%) was added. The reaction mixture was then heated to  $90\text{ }^\circ\text{C}$  for 16 h. Upon completion, the reaction mixture was cooled down, quenched with water, and extracted with EtOAc. The organic layers were combined, dried over  $\text{Na}_2\text{SO}_4$ , filtered, and evaporated under pressure to afford crude product **S34**. The crude product was purified using flash chromatography (20 – 30% EtOAc/DCM) to obtain **S34** as a light -yellow solid (0.157 g, 67% yield).

$^1\text{H}$  NMR (600 MHz,  $\text{CDCl}_3$ )  $\delta$  8.69 (s, 2H), 7.73 (d,  $J = 8.4$  Hz, 2H), 7.58 – 7.47 (m, 5H), 6.36 (d,  $J = 1.9$  Hz, 1H), 3.94 (s, 3H).

$^{13}\text{C}$  NMR (126 MHz,  $\text{CDCl}_3$ )  $\delta$  150.28, 147.57, 142.73, 138.70, 138.06, 131.54, 129.42, 127.33, 121.58, 106.37, 37.68.

HRMS (ESI): Expected mass  $[\text{M}+\text{H}^+]$ : 236.1182; found: 236.1183

Melting point = 135 °C

### General procedure 2: Synthesis of 4-aryl pyridine *N*-oxides

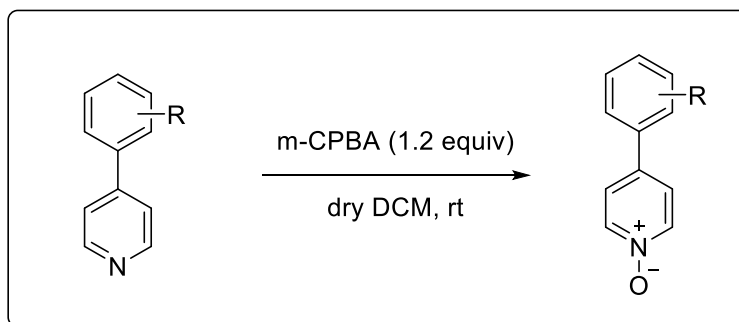

To a solution of 4-aryl pyridine in dry  $\text{CH}_2\text{Cl}_2$ , was added *m*CPBA (1.20 equiv) under argon atmosphere and stirred at rt for 24 h. Reaction was monitored using TLC and after completion DCM was evaporated under reduced pressure and purified using flash chromatography (5-10% MeOH/EtOAc) to obtain pure *N*-oxide.

### Preparation of S35

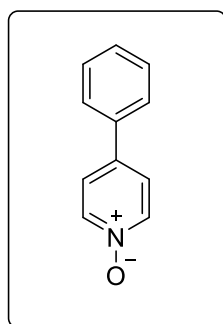

Following general procedure 2, 4-phenyl pyridine (0.780 g, 5.00 mmol, 1.00 equiv), dry  $\text{CH}_2\text{Cl}_2$  (5.00 mL), *m*CPBA (1.70 g, 6.00 mmol, 1.20 equiv) was used and crude was purified using flash chromatography (10% MeOH/EtOAc) as eluent to obtain **S35** as a white solid (0.800 g, 94% yield).

$^1\text{H}$  NMR (500 MHz,  $\text{CD}_3\text{OD}$ )  $\delta$  8.47 – 8.19 (m, 2H), 7.86 (d,  $J = 5.1$  Hz, 2H), 7.76 (d,  $J = 6.9$  Hz, 2H), 7.54 – 7.34 (m, 3H).

$^{13}\text{C}$  NMR (126 MHz,  $\text{CD}_3\text{OD}$ )  $\delta$  143.61, 140.51, 136.95, 130.82, 130.50, 127.83, 125.52.

HRMS (ESI): Expected mass  $[\text{M}+\text{H}^+]$ : 172.0757; found: 172.0757

Melting point = 114 – 116 °C

### Preparation of S36

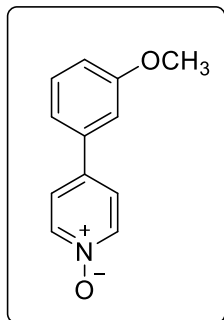

Following general procedure 2, 4-(3-Methoxy-phenyl)-pyridine (0.180 g, 1.00 mmol, 1.00 equiv), dry CH<sub>2</sub>Cl<sub>2</sub> (5.00 mL), *m*CPBA (0.340 g, 1.20 mmol, 1.20 equiv) was used and crude was purified using flash chromatography (10% MeOH/EtOAc ) to obtain **S36** as a yellow solid (0.180 g, 93% yield).

<sup>1</sup>H NMR (500 MHz, CD<sub>3</sub>OD) δ 8.35 – 8.30 (m, 2H), 7.80 (d, *J* = 7.2 Hz, 2H), 7.40 (t, *J* = 8.0 Hz, 1H), 7.31 – 7.20 (m, 2H), 7.02 (dd, *J* = 8.3, 2.4 Hz, 1H),

3.85 (s, 3H).

<sup>13</sup>C NMR (126 MHz, CD<sub>3</sub>OD) δ 161.96, 143.36, 140.42, 138.28, 131.59, 125.57, 120.08, 116.24, 113.40, 55.94.

HRMS (ESI): Expected mass [M+H<sup>+</sup>]: 202.0863; found: 202.0861

Melting point = 121 – 124 °C

### Preparation of S37

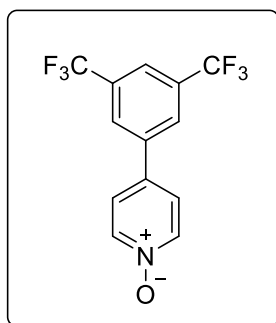

Following general procedure 2, 4-(3,5-bis-trifluoromethyl-phenyl)-pyridine (0.220 g, 0.770 mmol, 1.00 equiv), dry CH<sub>2</sub>Cl<sub>2</sub> (5.00 mL), *m*CPBA (0.260 g, 0.920 mmol, 1.20 equiv) was used and crude was purified using flash chromatography (5% MeOH/EtOAc) to obtain **S37** as a white solid (0.120 g, 52% yield)

<sup>1</sup>H NMR (500 MHz, CD<sub>3</sub>OD) δ 8.46 – 8.40 (m, 2H), 8.37 (s, 2H), 8.08 (s, 1H), 7.99 (d, *J* = 7.3 Hz, 2H).

<sup>13</sup>C NMR (126 MHz, CD<sub>3</sub>OD) δ 140.87, 139.89, 139.54, 133.81 (q, *J* = 33.57 Hz), 128.53, 126.30, 124.65 (q, *J* = 272.26 Hz), 123.83 (m)

HRMS (ESI): Expected mass [M+H<sup>+</sup>]: 308.0505; found: 308.0508

Melting point = 163 – 165 °C

## General Procedure A: Electrochemical Dearomative-Carboxylation of Pyridines

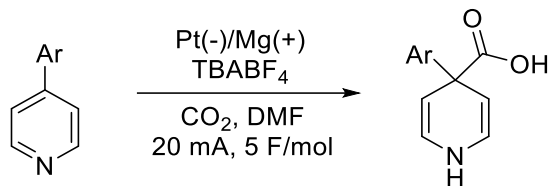

A 5.0 mL ElectraSyn vial was charged with 4-(hetero)arylpyridine and tetrabutylammonium tetrafluoroborate (0.25 mmol, 1.0 equiv.) in DMF (2.5 – 3.0 mL). The vial was then capped with an ElectraSyn vial cap equipped with a platinum cathode and a magnesium anode and the reaction mixture was stirred until it became homogenous. A balloon filled with CO<sub>2</sub> was used to bubble CO<sub>2</sub> into the reaction mixture prior to starting the reaction and then continued for the duration of the electrolysis (**Figure S1**). Electrolysis was performed at 20 mA current and 5 F/mol charge. Following electrolysis, the ElectraSyn vial cap was removed and 3M HCl was added dropwise with stirring into the reaction mixture until solution becomes transparent. The content of the vial was transferred to a separatory funnel and the electrodes were rinsed with ethyl acetate (ca. 2 mL) and the aqueous layer was extracted using ethyl acetate (10 mL). The organic layer was washed several times with ice cold water (~100 mL<sup>x</sup>5) to remove the existing DMF. The organic layers were dried over Na<sub>2</sub>SO<sub>4</sub>, filtered, concentrated under reduced pressure to obtain the crude product.

The crude product can be purified by making a suspension of it in DCM followed by adding hexane, which results in precipitation of the product. The precipitate is then filtered using filter paper and a Buchner funnel. The residue was washed thoroughly with DCM to obtain the pure product (**Figure S1.C**).

**Note:** The dihydropyridines are sensitive to light and air and in order to perform subsequent reactions the RB flask was wrapped in aluminium foil and the air inside the RB flask was evacuated and filled with argon. Further reactions were performed at quick succession to avoid re-aromatization.

### Graphical guide:

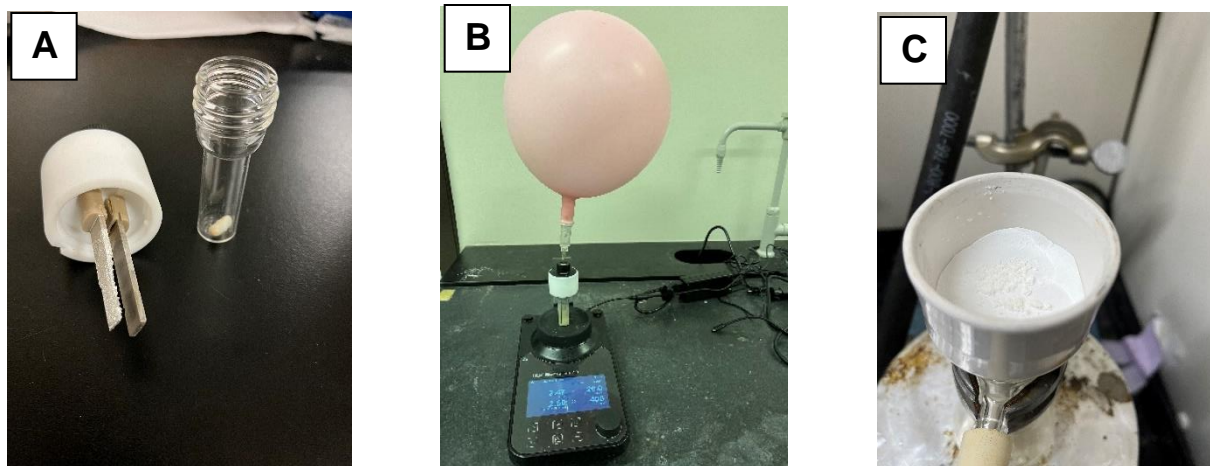

**Figure S1:** A) Electrodes (Mg anode and Pt cathode) and 5 mL vial with a stir bar; B) Electrochemical set up with CO<sub>2</sub> balloon; C) Product obtained after filtration

### General Procedure B: Reduction of 1,4-Dihydropyridine

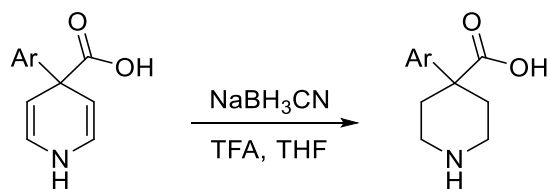

The dihydropyridines obtained in GP-A was dissolved in dry THF (4.0 mL) followed by addition of TFA (0.1 mL, 5.0 mmol) and NaBH<sub>3</sub>CN (0.043g, 2.7 mmol) under an argon atmosphere. The resulting reaction mixture was left to stir at RT for 2h. Upon completion of the reaction, the reaction mixture was evaporated under reduced pressure to obtain the crude product as a sticky solid. The crude product was used for next reaction without further purification.

**Note:** As the intermediate DHP was not isolated, the equivalence of NaBH<sub>3</sub>CN and TFA was calculated based on the 4-aryl pyridine weight.



### General Procedure C: Carboxylic Acid Reduction

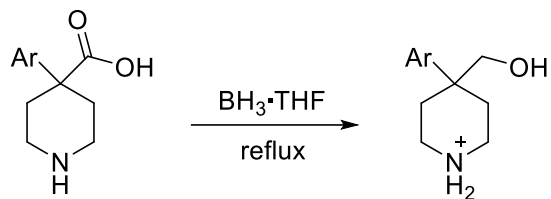

$\text{BH}_3 \cdot \text{THF}$  (1M in THF) (2.0 mL, 6.0 eq) was added to the crude obtained in GP-B under argon atmosphere and refluxed for 2h. The reaction mixture was allowed to cool and quenched with MeOH. The resulting mixture was evaporated and a 1:1 solution of 6N HCl (5 mL) and MeOH (5.0 mL) was added and refluxed for 1h. The reaction was allowed to cool down and MeOH was evaporated under reduced pressure. 6N NaOH was added to the reaction mixture until pH becomes ~14. This was then extracted three times with DCM. The combined organic layers were washed with water and brine, dried with  $\text{Na}_2\text{SO}_4$  and concentrated under reduced pressure to obtain the amino alcohol. A suspension of the amino alcohol was made in  $\text{Et}_2\text{O}$  (10.0 mL) after which HCl (2M in  $\text{Et}_2\text{O}$ ) was added and left to stir for 15 mins. After which the stirring was stopped and the precipitate was allowed to settle to the bottom of the flask. The supernatant liquid was removed using a syringe and then the solid was triturated with acetone to obtain the pure salt of amino alcohol.

**Note:** For some substrates  $\text{BH}_3 \cdot \text{THF}$  was required in 12.0 equiv and also reflux duration was 16 h. This is indicated in their respective procedures.

**Optimization table 1:**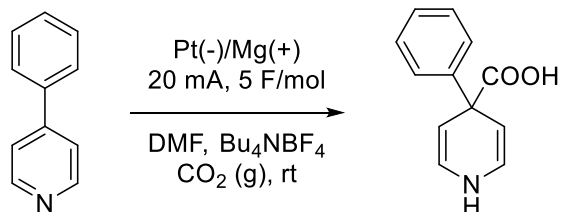

| Entry | Variation from above                                                         | Yield (%)   |
|-------|------------------------------------------------------------------------------|-------------|
| 1     | None                                                                         | 63          |
| 2     | Mg as anode and Sn as cathode                                                | trace       |
| 3     | Mg as anode and Ti as cathode                                                | 47          |
| 4     | Mg as anode and Ni as cathode                                                | trace       |
| 5     | Mg as anode and Cu as cathode                                                | 54          |
| 6     | Mg as anode and steel as cathode                                             | 44          |
| 7     | Mg as anode and Co as cathode                                                | 18          |
| 8     | Mg as anode and graphite as cathode                                          | 18          |
| 9     | Mg as anode and GC as cathode                                                | 34          |
| 10    | 60 °C instead of rt                                                          | 28          |
| 11    | 80 °C instead of rt                                                          | trace       |
| 12    | 0 °C instead of rt                                                           | 11          |
| 13    | 5 mA instead of 20 mA                                                        | trace       |
| 14    | 15 mA instead of 20 mA                                                       | 62          |
| 15    | 22 mA instead of 20 mA                                                       | 28          |
| 16    | DMA solvent instead of DMF                                                   | 24          |
| 17    | DMSO instead of DMF                                                          | no reaction |
| 18    | dry DMF instead of DMF                                                       | 50          |
| 19    | Bu <sub>4</sub> Ni instead of Bu <sub>4</sub> NBF <sub>4</sub>               | 10          |
| 20    | Me <sub>4</sub> NPF <sub>6</sub> instead of Bu <sub>4</sub> NBF <sub>4</sub> | no reaction |
| 21    | MeCN instead of DMF                                                          | no reaction |

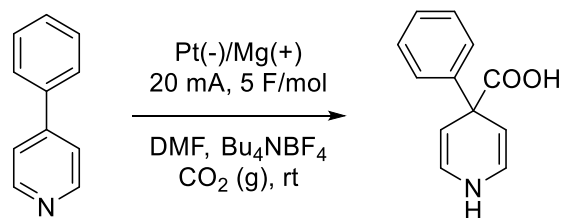

| Entry | Variation from above                                                          | Yield (%)   |
|-------|-------------------------------------------------------------------------------|-------------|
| 22    | Et <sub>4</sub> NBF <sub>4</sub> instead of Bu <sub>4</sub> NBF <sub>4</sub>  | 70          |
| 23    | Me <sub>4</sub> NBF <sub>4</sub> instead of Bu <sub>4</sub> NBF <sub>4</sub>  | no reaction |
| 24    | Bu <sub>4</sub> NOAc instead of Bu <sub>4</sub> NBF <sub>4</sub>              | no reaction |
| 25    | Et <sub>4</sub> NBF <sub>4</sub> + 20 μL H <sub>2</sub> O                     | trace       |
| 26    | Bu <sub>4</sub> NClO <sub>4</sub> instead of Bu <sub>4</sub> NBF <sub>4</sub> | trace       |
| 27    | Bu <sub>4</sub> NBr instead of Bu <sub>4</sub> NBF <sub>4</sub>               | 22          |
| 28    | NH <sub>4</sub> Cl instead of Bu <sub>4</sub> NBF <sub>4</sub>                | no reaction |

**Optimization table 2:**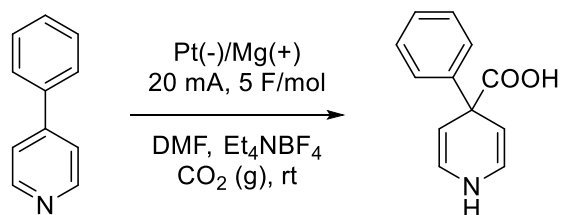

| Entry | Variation from above                | Yield (%)         |
|-------|-------------------------------------|-------------------|
| 1     | None                                | 70                |
| 2     | Mg as anode and Sn as cathode       | no reaction       |
| 3     | Mg as anode and Ti as cathode       | 25                |
| 4     | Mg as anode and Ni as cathode       | 54                |
| 5     | Mg as anode and Al as cathode       | no reaction       |
| 6     | Mg as anode and steel as cathode    | 7                 |
| 7     | Mg as anode and Co as cathode       | trace             |
| 8     | Mg as anode and graphite as cathode | 23                |
| 9     | Mg as anode and GC as cathode       | trace             |
| 10    | Mg as anode and Ni foam as cathode  | 70                |
| 11    | Zn as anode and Pt as cathode       | 55                |
| 12    | Zn as anode and Ni foam as cathode  | undesired product |
| 13    | 10 mA instead of 20 mA              | 34                |
| 14    | 15 mA instead of 20 mA              | 45                |
| 15    | 25 mA instead of 20 mA              | 18                |
| 16    | 30 mA instead of 20 mA              | trace             |
| 17    | 3 F/mol instead of 5 F/mol          | 64                |
| 18    | 4 F/mol instead of 5 F/mol          | 66                |
| 19    | 6 F/mol instead of 5 F/mol          | 13                |

## Preparation and Characterization of 1,4-Dihydropyridines and piperidines

*Note: Due to the instability of 1,4-dihydropyridines, HRMS, <sup>13</sup>C and melting point data could not be obtained.*

### *Preparation of 13*

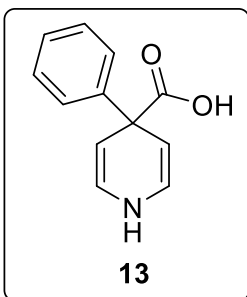

Following the General Procedure A with 4-phenyl-pyridine (0.038 g, 0.25 mmol) afforded **13** as a white solid. The <sup>1</sup>H NMR yield was determined to be 63% with dibromomethane as the internal standard.

Data for **13**: <sup>1</sup>H NMR (400 MHz, CD<sub>3</sub>OD) δ 7.37 – 7.27 (m, 4H), 7.25 – 7.17 (m, 1H), 7.02 (d, *J* = 8.6 Hz, 2H), 5.31 (d, *J* = 8.6 Hz, 2H).

### *Preparation of 49*

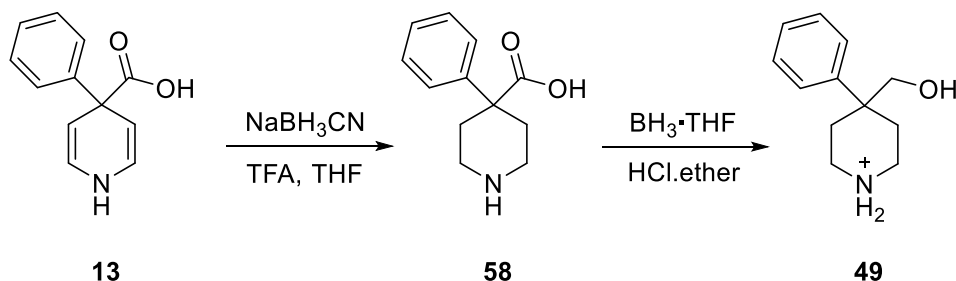

Following General Procedure B, the crude reaction mixture of **13** treated with NaBH<sub>3</sub>CN (0.043 g, 5.4 mmol) and TFA (0.10 mL, 10.0 mmol) in THF (4.0 mL) afforded crude product **58** as a sticky solid. Following General Procedure C, crude product **58** dissolved in BH<sub>3</sub>-THF (2.0 mL) afforded **49** as a white solid (5.0 mg, 11% over 3 steps).

Data for **49**: <sup>1</sup>H NMR (400 MHz, CD<sub>3</sub>OD) δ 7.58 – 7.27 (m, 4H), 7.24 (ddd, *J* = 7.1, 3.8, 1.8 Hz, 1H), 3.48 (s, 2H), 3.09 (dt, *J* = 13.0, 4.0 Hz, 2H), 2.76 (td, *J* = 12.9, 2.7 Hz, 2H), 2.30 (d, *J* = 14.5 Hz, 2H), 2.06 – 1.91 (m, 2H).

<sup>13</sup>C NMR (176 MHz, CD<sub>3</sub>OD) δ 143.46, 129.77, 128.35, 127.51, 72.51, 43.46, 42.59, 31.27.

HRMS (ESI): Expected mass [*M*<sup>+</sup>]: 192.1383; found: 192.1381

Melting point = 166 °C

### Preparation of **14**

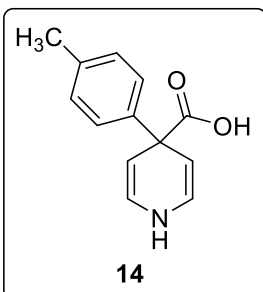

Following the General Procedure A with **S1** (0.042 g, 0.25 mmol) afforded **14** as a white solid. The <sup>1</sup>H NMR yield was determined to be 42% with dibromomethane as the internal standard.

Data for **14**: <sup>1</sup>H NMR (400 MHz, CD<sub>3</sub>OD) δ 7.20 – 7.12 (m, 4H), 7.03 – 6.98 (m, 2H), 5.28 (d, *J* = 8.7 Hz, 2H), 2.30 (s, 3H)

### Preparation of **14A**

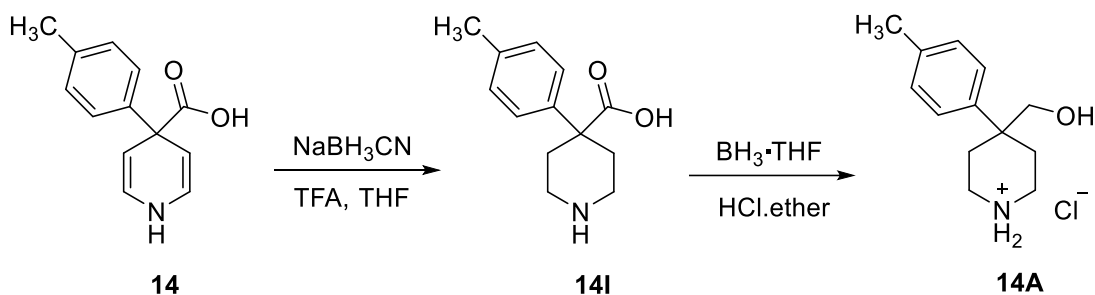

Following General Procedure B, the crude reaction mixture of **14** treated with NaBH<sub>3</sub>CN (0.043 g, 5.4 mmol) and TFA (0.10 mL, 10.0 mmol) in THF (4.0 mL) afforded crude product **14I** as a sticky solid. Following General Procedure C, crude product **14I** dissolved in BH<sub>3</sub>-THF (2.0 mL) afforded **14A** as a white solid (0.017 g, 28 % over 3 steps).

Data for **14A**: <sup>1</sup>H NMR (400 MHz, CD<sub>3</sub>OD) δ 7.26 (dd, *J* = 27.2, 8.2 Hz, 4H), 3.46 (s, 2H), 3.35-3.28 (2H)\*, 2.90 (td, *J* = 12.7, 2.5 Hz, 2H), 2.41 (d, *J* = 14.4 Hz, 2H), 2.32 (s, 3H), 2.18 – 2.07 (m, 2H).

<sup>13</sup>C NMR (126 MHz, CD<sub>3</sub>OD) δ 138.79, 137.71, 130.74, 128.09, 72.34, 42.82, 42.11, 29.25, 20.94.

\*2H peak merging with CD<sub>3</sub>OD peak confirmed by COSY

HRMS (ESI): Expected mass [M<sup>+</sup>]: 206.1539; found: 206.154.

Melting point = 232 °C

### Preparation of **15**

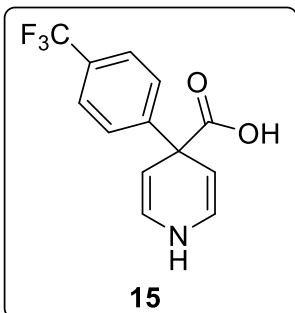

Following the General Procedure A with **S2** (0.055 g, 0.25 mmol) afforded **15** as a white solid. The  $^1\text{H}$  NMR yield was determined to be 75% with dibromomethane as the internal standard.

Data for **15**:  $^1\text{H}$  NMR (400 MHz, acetone- $d_6$ )  $\delta$  7.75 (d,  $J$  = 8.3 Hz, 2H), 7.59 (d,  $J$  = 8.2 Hz, 2H), 7.12 – 7.09 (m, 2H), 5.40 (d,  $J$  = 8.7 Hz, 2H)

$^{19}\text{F}$  NMR (376 MHz, acetone- $d_6$ )  $\delta$  -62.97

### Preparation of **46**

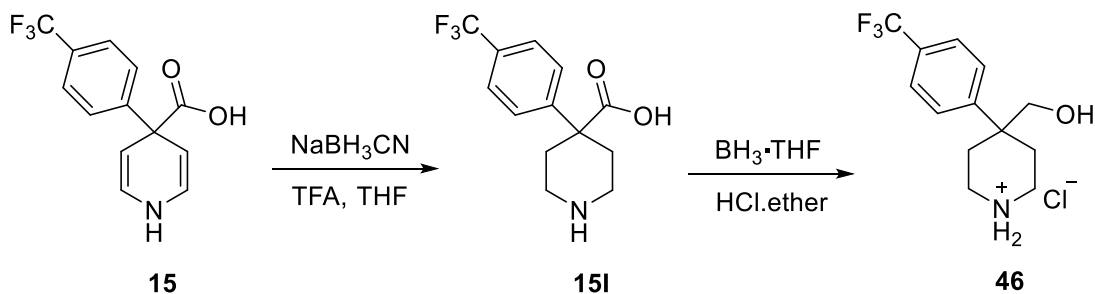

Following General Procedure B, the crude reaction mixture of **15** treated with  $\text{NaBH}_3\text{CN}$  (0.043 g, 2.7 mmol) and TFA (0.10 mL, 5.0 mmol) in THF (4.0 mL) afforded crude product **15I** as a sticky solid. Following General Procedure C, crude product **15I** dissolved in  $\text{BH}_3\text{-THF}$  (2.0 mL) afforded **46** as a white solid (0.016 g, 22 % over 3 steps).

Data for **46**:  $^1\text{H}$  NMR (400 MHz,  $\text{CD}_3\text{OD}$ )  $\delta$  7.68 (dd,  $J$  = 26.4, 8.5 Hz, 4H), 3.54 (s, 2H), 3.38-3.32 (2H)\*, 2.97 – 2.85 (m, 2H), 2.48 (d,  $J$  = 15.1 Hz, 2H), 2.17 (ddd,  $J$  = 11.7, 10.2, 3.9 Hz, 2H).

$^{13}\text{C}$  NMR (125 MHz,  $\text{CD}_3\text{OD}$ ):  $\delta$  142.27, 130.12 (q,  $J$  = 33.1 Hz), 129.14, 126.75 (q,  $J$  = 3.61 Hz), 124.62 (q,  $J$  = 270.94), 71.56, 43.37, 42.01, 29.35

\*2H peak merging with  $\text{CD}_3\text{OD}$  peak confirmed by COSY

HRMS (ESI): Expected mass  $[\text{M}+\text{H}^+]$ : 260.1257; found: 260.1254

Melting point = 145 °C

### Preparation of **16**

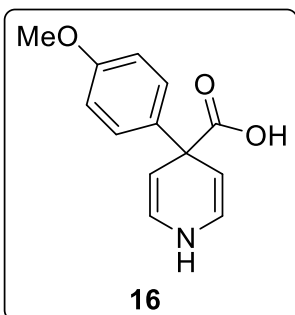

Following the General Procedure A with **S3** (0.046 g, 0.25 mmol) afforded **16** as a white solid. The <sup>1</sup>H NMR yield was determined to be 53% with dibromomethane as the internal standard.

Data for **16**: <sup>1</sup>H NMR (600 MHz, CD<sub>3</sub>OD): δ 7.20 (d, *J* = 8.7 Hz, 2H), 7.00 (d, *J* = 8.3 Hz, 2H), 6.88 (d, *J* = 8.7 Hz, 2H), 5.28 (d, *J* = 8.3 Hz, 2H), 3.77 (d, *J* = 6.4 Hz, 3H);

### Preparation of **16A**

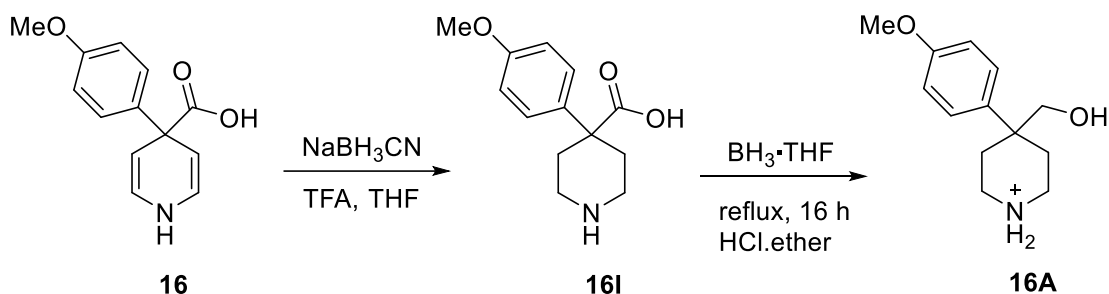

Following General Procedure B, the crude reaction mixture of **16** treated with NaBH<sub>3</sub>CN (0.043 g, 2.7 mmol) and TFA (0.10 mL, 5.0 mmol) in THF (4.0 mL) afforded crude product **16I** as a sticky solid. Following General Procedure C, crude product **16I** dissolved in BH<sub>3</sub>-THF (4.0 mL) afforded **16A** as a white solid (5.0 mg, 8 % over 3 steps).

Data for **16A**: <sup>1</sup>H NMR (400 MHz, CD<sub>3</sub>OD) δ 7.31 (d, *J* = 8.8 Hz, 2H), 6.95 (d, *J* = 8.8 Hz, 2H), 3.79 (s, 3H), 3.44 (s, 2H), 3.23 – 3.09 (m, 2H), 2.82 (t, *J* = 12.3 Hz, 2H), 2.30 (d, *J* = 14.6 Hz, 2H), 2.07 – 1.95 (m, 2H).

<sup>13</sup>C NMR (126 MHz, CD<sub>3</sub>OD) δ 159.84, 134.34, 129.38, 115.30, 72.58, 55.73, 42.71, 42.36, 30.43.



HRMS (ESI): Expected mass [ $M^+$ ]: 222.1489; found: 222.1489.

Melting point = 212 – 215 °C

### Preparation of **17**

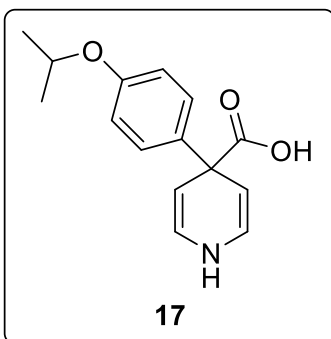

Following the General Procedure A with **S5** (0.053 g, 0.25 mmol) afforded **17** as a white solid. The  $^1\text{H}$  NMR yield was determined to be 48% with dibromomethane as the internal standard.

Data for **17**:  $^1\text{H}$  NMR (400 MHz,  $\text{CD}_3\text{OD}$ ):  $\delta$  7.18 (d,  $J$  = 8.8 Hz, 2H), 7.00 (d,  $J$  = 8.6 Hz, 2H), 6.86 (d,  $J$  = 8.8 Hz, 2H), 5.29 (d,  $J$  = 8.6 Hz, 2H), 4.56 (dt,  $J$  = 12.1, 6.0 Hz, 1H), 1.28 (d,  $J$  = 6.0 Hz, 6H);

### Preparation of **17A**

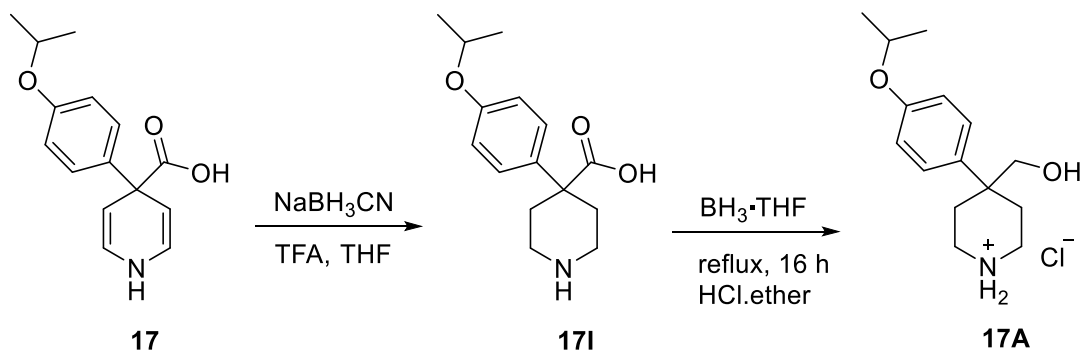

Following General Procedure B, the crude reaction mixture of **17** treated with  $\text{NaBH}_3\text{CN}$  (0.043 g, 2.7 mmol) and TFA (0.10 mL, 5.0 mmol) in THF (4.0 mL) afforded crude product **17I** as a sticky solid. Following General Procedure C, crude product **17I** dissolved in  $\text{BH}_3\text{-THF}$  (4.0 mL) afforded **17A** as a white solid (8.5 mg, 12 % over 3 steps).

Data for **17A**:  $^1\text{H}$  NMR (600 MHz,  $\text{CD}_3\text{OD}$ ):  $\delta$  7.32-7.28 (m, 2H), 6.96-6.91 (m, 2H), 4.59 (dt,  $J$  = 12.1, 6.0 Hz, 1H), 3.44 (s, 2H), 3.42 (m, 2H), 2.91 (td,  $J$  = 12.7, 2.2 Hz, 2H), 2.38 (d,  $J$  = 14.6, 2H), 2.21-2.0 (m, 2H), 1.30 (d,  $J$  = 6.0 Hz, 6H).

$^{13}\text{C}$  NMR (126 MHz,  $\text{CD}_3\text{OD}$ )  $\delta$  158.15, 133.38, 129.33, 117.37, 72.39, 70.94, 42.51, 42.10, 29.31, 22.37

HRMS (ESI): Expected mass  $[M+H^+]$ : 250.1802; found: 250.18.

Melting point = 230 – 232 °C

### Preparation of 18

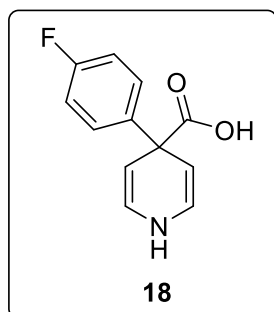

Following the General Procedure A with **S8** (0.043 g, 0.25 mmol) afforded **18** as a white solid. The  $^1\text{H}$  NMR yield was determined to be 55% with dibromomethane as the internal standard.

Data for **18**:  $^1\text{H}$  NMR (400 MHz,  $\text{CD}_3\text{OD}$ )  $\delta$  7.35 – 7.27 (m, 2H), 7.10 – 6.99 (m, 4H), 5.32 – 5.26 (m, 2H).

$^{19}\text{F}$  NMR (376 MHz,  $\text{CD}_3\text{OD}$ )  $\delta$  -118.31

### Preparation of 51

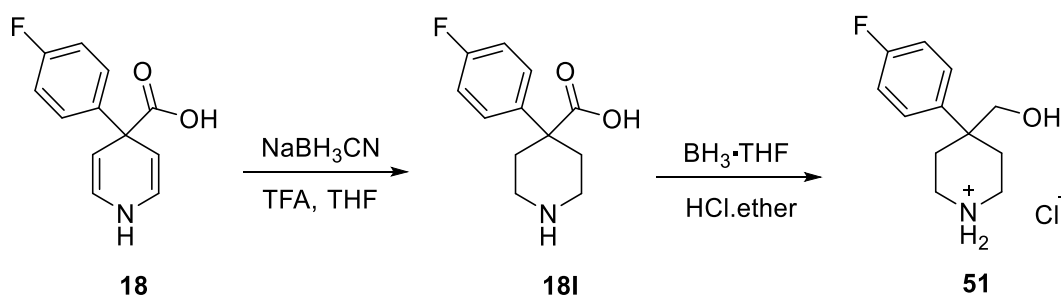

Following General Procedure B, the crude reaction mixture of **18** treated with  $\text{NaBH}_3\text{CN}$  (0.043 g, 2.7 mmol) and TFA (0.10 mL, 5.0 mmol) in THF (4.0 mL) afforded crude product **18I** as a sticky solid. Following General Procedure C, crude product **18I** dissolved in  $\text{BH}_3\text{-THF}$  (2.0 mL) afforded **51** as a white solid (8.0 mg, 28 % over 3 steps).

Data for **51**:  $^1\text{H}$  NMR (600 MHz,  $\text{CD}_3\text{OD}$ )  $\delta$  7.45 (dd,  $J = 8.9, 5.2$  Hz, 2H), 7.14 (t,  $J = 8.8$  Hz, 2H), 3.48 (s, 2H), 3.33 (2H)\*, 2.90 (td,  $J = 12.8, 2.7$  Hz, 2H), 2.40 (d,  $J = 15.0$  Hz, 2H), 2.18 – 2.05 (m, 2H).

$^{13}\text{C}$  NMR (126 MHz,  $\text{CD}_3\text{OD}$ )  $\delta$  163.10 (d,  $J = 244.68$  Hz), 138.22, 130.23 (d,  $J = 7.92$  Hz), 116.57 (d,  $J = 21.19$  Hz), 72.01, 42.77, 42.06, 29.61.

\* 2H peak merging with CD<sub>3</sub>OD peak confirmed by COSY

HRMS (ESI): Expected mass [M<sup>+</sup>]: 210.1289; found: 210.129.

Melting point = 208 – 210 °C

### Preparation of **19**

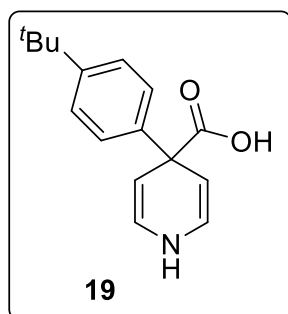

Following the General Procedure A with 4-(4-*tert*-Butyl-phenyl)-pyridine (0.052 g, 0.25 mmol) afforded **19** as a white solid. The <sup>1</sup>H NMR yield was determined to be 60% with dibromomethane as the internal standard.

Data for **19**: <sup>1</sup>H NMR (600 MHz, CD<sub>3</sub>OD): δ 7.37 (d, *J* = 8.5 Hz, 2H), 7.21 (d, *J* = 8.5 Hz, 2H), 7.02 (d, *J* = 8.5 Hz, 2H), 5.27 (d, *J* = 8.5 Hz,

2H), 1.30 (s, 9H);

### Preparation of **19A**

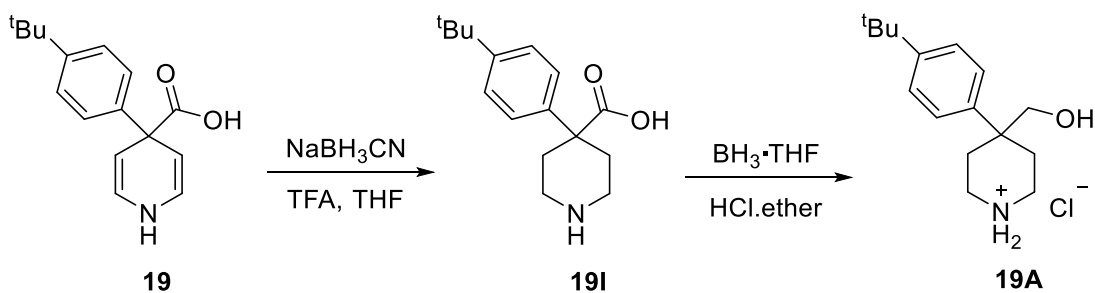

Following General Procedure B, the crude reaction mixture of **19** treated with NaBH<sub>3</sub>CN (0.043 g, 2.7 mmol) and TFA (0.10 mL, 5.0 mmol) in THF (4.0 mL) afforded crude product **19I** as a sticky solid. Following General Procedure C, crude product **19I** dissolved in BH<sub>3</sub>-THF (2.0 mL) afforded **19A** as a white solid (0.010 g, 14 % over 3 steps).

Data for **19A**: <sup>1</sup>H NMR (400 MHz, CD<sub>3</sub>OD): δ 7.41 (d, *J* = 8.5 Hz, 2H), 7.31 (d, *J* = 8.5 Hz, 2H), 3.44 (s, 2H), 3.04 (d, *J* = 12.9 Hz, 2H), 2.74 (t, *J* = 11.2 Hz, 2H), 2.26 (d, *J* = 14.1 Hz, 2H), 2.01-1.77 (m, 2H), 1.31 (s, 9H).

$^{13}\text{C}$  NMR (126 MHz,  $\text{CD}_3\text{OD}$ )  $\delta$  150.27, 140.49, 128.12, 126.63, 72.78, 43.20, 42.70, 35.17, 31.78, 31.63

HRMS (ESI): Expected mass  $[\text{M}+\text{H}^+]$ : 248.2009; found: 248.2007.

Melting point = 255  $^\circ\text{C}$

### Preparation of **20**

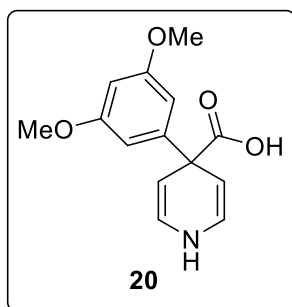

Following the General Procedure A with **S12** (0.053 g, 0.25 mmol) afforded **20** as a white solid. The  $^1\text{H}$  NMR yield was determined to be 57% with dibromomethane as the internal standard.

Data for **20**:  $^1\text{H}$  NMR (400 MHz,  $\text{CD}_3\text{OD}$ )  $\delta$  7.03 (d,  $J = 8.6$  Hz, 2H), 6.45 (d,  $J = 2.2$  Hz, 2H), 6.36 (t,  $J = 2.2$  Hz, 1H), 5.27 (d,  $J = 8.6$  Hz, 2H), 3.75 (s, 6H)

### Preparation of **20A**

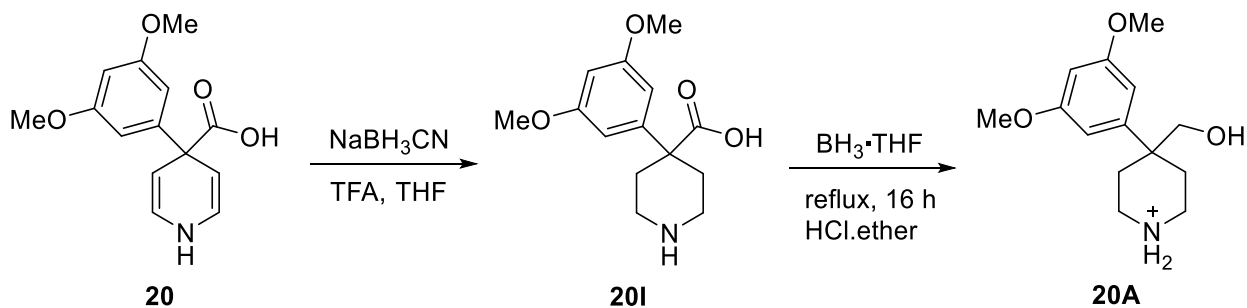

Following General Procedure B, the crude reaction mixture of **20** treated with  $\text{NaBH}_3\text{CN}$  (0.043 g, 2.7 mmol) and TFA (0.10 mL, 5.0 mmol) in THF (4.0 mL) afforded crude product **20I** as a sticky solid. Following General Procedure C, crude product **20I** dissolved in  $\text{BH}_3\text{-THF}$  (4.0 mL) afforded **20A** as a white solid (9.0 mg, 12 % over 3 steps).

Data for **20A**:  $^1\text{H}$  NMR (600 MHz,  $\text{CD}_3\text{OD}$ )  $\delta$  6.53 (d,  $J = 2.1$  Hz, 2H), 6.44 (t,  $J = 2.0$  Hz, 1H), 3.79 (s, 6H), 3.47 (s, 2H), 3.33 (2H)\*, 2.94 (dd,  $J = 12.3, 11.0$  Hz, 2H), 2.37 (d,  $J = 14.7$  Hz, 2H), 2.13 – 2.05 (m, 2H).

$^{13}\text{C}$  NMR (126 MHz,  $\text{CD}_3\text{OD}$ )  $\delta$  163.01, 144.44, 106.75, 99.19, 72.10, 55.84, 43.39, 42.20, 29.41

\* $^2\text{H}$  peak merging with  $\text{CD}_3\text{OD}$  peak confirmed by COSY

HRMS (ESI): Expected mass [ $\text{M}^+$ ]: 252.1594; found: 252.1593.

Melting point = 227 °C

### Preparation of **21**

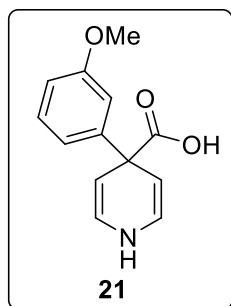

Following the General Procedure A with **S13** (0.046 g, 0.25 mmol) afforded **21** as a white solid. The  $^1\text{H}$  NMR yield was determined to be 43% with dibromomethane as the internal standard.

Data for **21**:  $^1\text{H}$  NMR (400 MHz,  $\text{CD}_3\text{OD}$ ):  $\delta$  7.25 (t,  $J$  = 8.0 Hz, 1H), 7.04 – 7.00 (m, 2H), 6.89 – 6.77 (m, 3H), 5.32 – 5.29 (m, 2H), 3.77 (s, 3H);

### Preparation of **50**

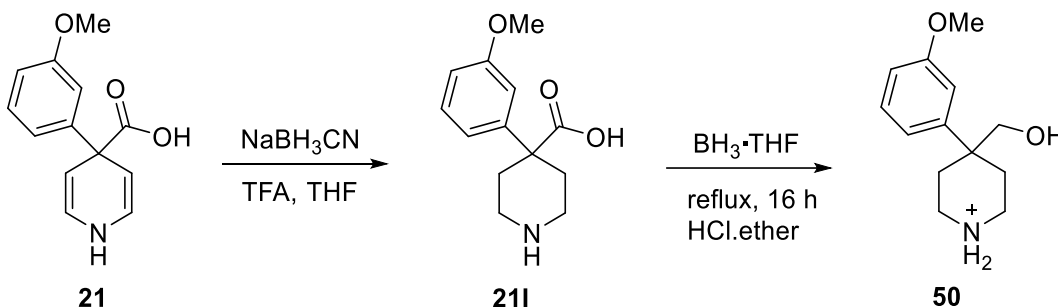

Following General Procedure B, the crude reaction mixture of **21** treated with  $\text{NaBH}_3\text{CN}$  (0.043 g, 2.7 mmol) and TFA (0.10 mL, 5.0 mmol) in THF (4.0 mL) afforded crude product **21I** as a sticky solid. Following General Procedure C, crude product **21I** dissolved in  $\text{BH}_3\text{-THF}$  (4.0 mL) afforded **50** as a white solid (21.0 mg, 32% over 3 steps).

Data for **50**:  $^1\text{H}$  NMR (400 MHz,  $\text{CD}_3\text{OD}$ )  $\delta$  7.34 (t,  $J$  = 8.0 Hz, 1H), 7.04 – 6.96 (m, 1H), 6.95 (t,  $J$  = 2.1 Hz, 1H), 6.87 (dd,  $J$  = 8.2, 1.9 Hz, 1H), 3.81 (s, 3H), 3.48 (s, 2H), 3.34 (m, 2H), 2.93 (td,  $J$  = 12.7, 2.4 Hz, 2H), 2.41 (d,  $J$  = 14.5 Hz, 2H), 2.19 – 2.04 (m, 2H).

$^{13}\text{C}$  NMR (126 MHz,  $\text{CD}_3\text{OD}$ )  $\delta$  161.84, 143.63, 131.17, 120.29, 114.79, 112.77, 72.16, 55.74, 43.20, 42.17, 29.34

HRMS (ESI): Expected mass [ $\text{M}^+$ ]: 222.1489; found: 222.1486.

Melting point = 215  $^\circ\text{C}$

### Preparation of **22**

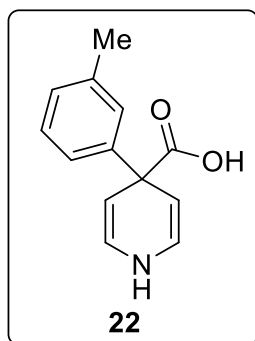

Following the General Procedure A with **S14** (0.042 g, 0.25 mmol) afforded **22** as a white solid. The  $^1\text{H}$  NMR yield was determined to be 35% with dibromomethane as the internal standard.

Data for **22**:  $^1\text{H}$  NMR (400 MHz,  $\text{CD}_3\text{OD}$ ):  $\delta$  7.21 (t,  $J = 7.6$  Hz, 1H), 7.13 – 6.97 (m, 5H), 5.30 (d,  $J = 8.6$  Hz, 2H), 2.32 (s, 3H);

### Preparation of **30A**

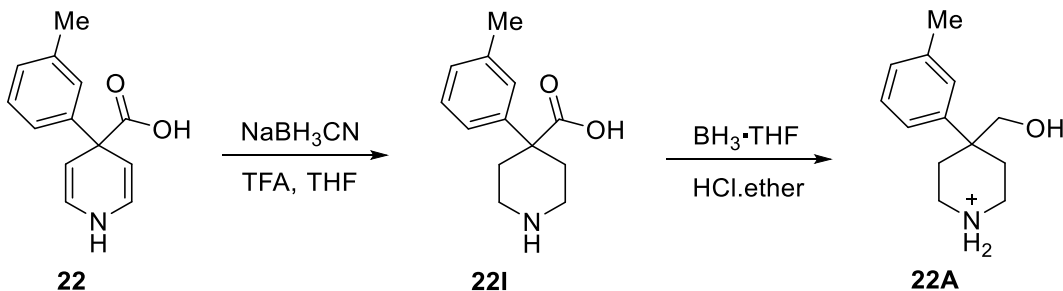

Following General Procedure B, the crude reaction mixture of **22** treated with  $\text{NaBH}_3\text{CN}$  (0.043 g, 2.7 mmol) and TFA (0.10 mL, 5.0 mmol) in THF (4.0 mL) afforded crude product **22I** as a sticky solid. Following General Procedure C, crude product **22I** dissolved in  $\text{BH}_3\text{-THF}$  (2.0 mL) afforded **22A** as a white solid (8.5 mg, 14 % over 3 steps).

Data for **22A**:  $^1\text{H}$  NMR (600 MHz,  $\text{CD}_3\text{OD}$ )  $\delta$  7.30 (t,  $J = 7.7$  Hz, 1H), 7.26 – 7.18 (m, 2H), 7.11 (d,  $J = 7.4$  Hz, 1H), 3.46 (s, 2H), 3.33 – 3.27 (2H)\*, 2.91 (td,  $J = 12.7, 2.6$  Hz, 2H), 2.42 (d,  $J = 14.1$  Hz, 2H), 2.37 (s, 3H), 2.15 – 2.04 (m, 2H).

$^{13}\text{C}$  NMR (176 MHz,  $\text{CD}_3\text{OD}$ )  $\delta$  141.90, 139.82, 129.98, 128.74, 128.64, 125.15, 72.28, 43.04, 42.18, 30.15, 29.38.

\* $^2\text{H}$  merged with  $\text{CD}_3\text{OD}$  confirmed by COSY NMR

HRMS (ESI): Expected mass [ $\text{M}^+$ ]: 206.1539; found: 206.1539.

Melting point = 236 – 238  $^\circ\text{C}$

### Preparation of **23**

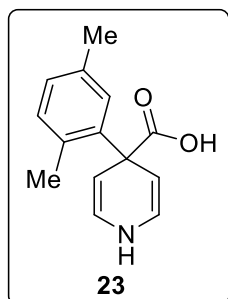

Following the General Procedure A with **S15** (0.045 g, 0.25 mmol) afforded **23** as a yellow solid. The  $^1\text{H}$  NMR yield was determined to be 50% with dibromomethane as the internal standard.

Data for **23**:  $^1\text{H}$  NMR (400 MHz,  $\text{CD}_3\text{OD}$ )  $\delta$  7.20 (d,  $J$  = 8.0 Hz, 1H), 7.17 – 7.11 (m, 2H), 7.06 (d,  $J$  = 8.4 Hz, 2H), 5.15 (d,  $J$  = 8.4 Hz, 2H), 2.29 (s, 3H), 2.27 (s, 3H).

### Preparation of **23A**

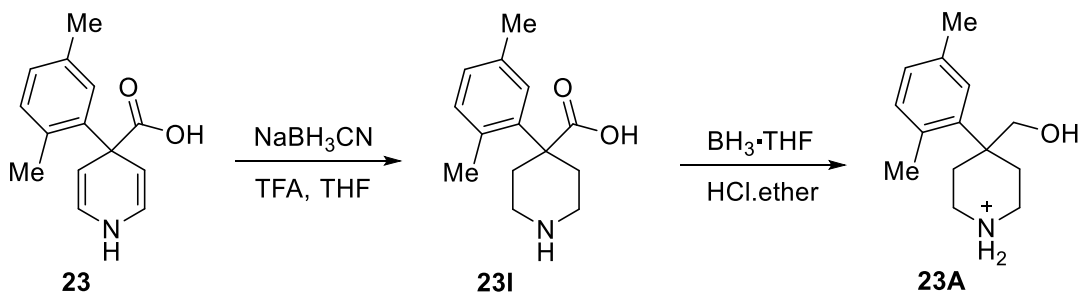

Following General Procedure B, the crude reaction mixture of **23** treated with  $\text{NaBH}_3\text{CN}$  (0.043 g, 2.7 mmol) and TFA (0.10 mL, 5.0 mmol) in THF (4.0 mL) afforded crude product **23I** as a sticky solid. Following General Procedure C, crude product **23I** dissolved in  $\text{BH}_3\text{-THF}$  (2.0 mL) afforded **23A** as a white solid (7.6 mg, 12 % over 3 steps).

Data for **23A**:  $^1\text{H}$  NMR (400 MHz,  $\text{CD}_3\text{OD}$ )  $\delta$  7.13 (s, 1H), 7.09 (d,  $J$  = 7.8 Hz, 1H), 7.00 (d,  $J$  = 7.7 Hz, 1H), 3.64 (s, 2H), 3.35 (s, 2H), 2.94 (t,  $J$  = 12.6 Hz, 2H), 2.66 (d,  $J$  = 14.8 Hz, 2H), 2.45 (s, 3H), 2.32 (s, 3H), 2.20 – 2.05 (m, 2H).

$^{13}\text{C}$  NMR (126 MHz,  $\text{CD}_3\text{OD}$ )  $\delta$  138.53, 137.17, 135.24, 134.84, 131.00, 128.97, 69.27, 45.20, 42.27, 30.22, 24.23, 21.21.

HRMS (ESI): Expected mass [ $\text{M}^+$ ]: 220.1696; found: 220.1695.

Melting point = 251  $^\circ\text{C}$

### Preparation of **24**

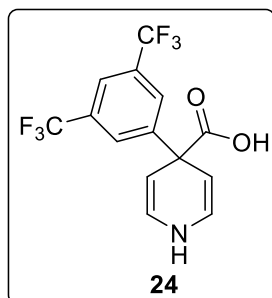

Following the General Procedure A with **S16** (0.072 g, 0.25 mmol) afforded **24** as a orange solid. The  $^1\text{H}$  NMR yield was determined to be 36% with dibromomethane as the internal standard.

Data for **24**:  $^1\text{H}$  NMR (400 MHz,  $\text{CD}_3\text{OD}$ ):  $\delta$  7.87 (s, 3H), 7.15 (d,  $J$  = 8.6 Hz, 2H), 5.35 (d,  $J$  = 8.6 Hz, 2H).

$^{19}\text{F}$  NMR (376 MHz,  $\text{CD}_3\text{OD}$ )  $\delta$  -64.33

### Preparation of **48**

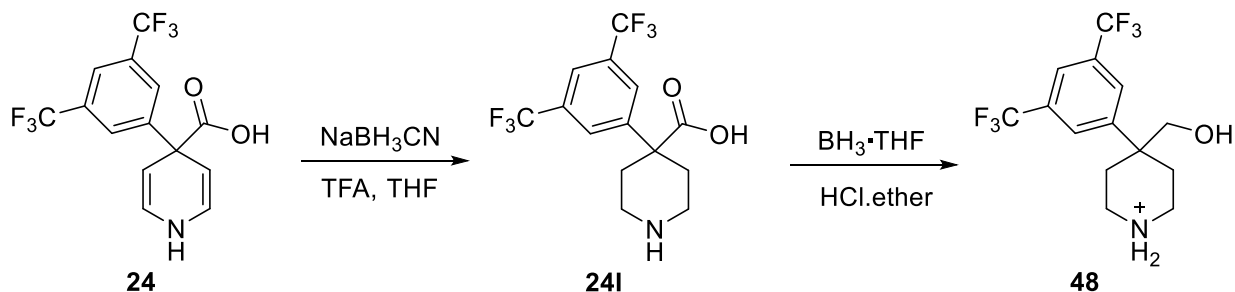

Following General Procedure B, the crude reaction mixture of **24** treated with  $\text{NaBH}_3\text{CN}$  (0.043 g, 2.7 mmol) and TFA (0.10 mL, 5.0 mmol) in THF (4.0 mL) afforded crude product **24I** as a sticky solid. Following General Procedure C, crude product **24I** dissolved in  $\text{BH}_3\text{-THF}$  (2.0 mL) afforded **48** as a white solid (0.020 g, 22 % over 3 steps).

Data for **48**:  $^1\text{H}$  NMR (400 MHz,  $\text{CD}_3\text{OD}$ )  $\delta$  8.00 (s, 2H), 7.90 (s, 1H), 3.64 (s, 2H), 3.43 – 3.36 (m, 2H), 3.05 – 2.95 (m, 2H), 2.46 (d,  $J$  = 16.1 Hz, 2H), 2.30 – 2.15 (m, 2H).



$^{13}\text{C}$  NMR (125 MHz,  $\text{CD}_3\text{OD}$ ):  $\delta$  147.25, 133.08 (q,  $J = 33.07$  Hz), 128.93, 124.95 (q,  $J = 272.01$  Hz), 121.85 (m), 70.05, 43.18, 41.78, 29.39

HRMS (ESI): Expected mass [ $\text{M}^+$ ]: 328.1131; found: 328.1130.

### Preparation of **25**

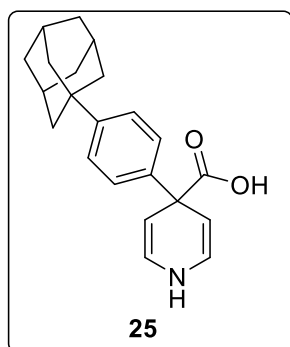

Following the General Procedure A with **S11** (0.072 g, 0.25 mmol) afforded **25** as a white solid. The  $^1\text{H}$  NMR yield was determined to be 30% with dibromomethane as the internal standard.

Data for **25**:  $^1\text{H}$  NMR (400 MHz,  $\text{CD}_3\text{OD}$ ):  $\delta$  7.45 – 7.28 (m, 2H), 7.27 – 7.14 (m, 2H), 7.01 (d,  $J = 8.6$  Hz, 2H), 5.27 (d,  $J = 8.6$  Hz, 2H), 2.07 (s, 3H), 1.92 (d,  $J = 2.6$  Hz, 6H), 1.81 (s, 6H);

### Preparation of **25A**

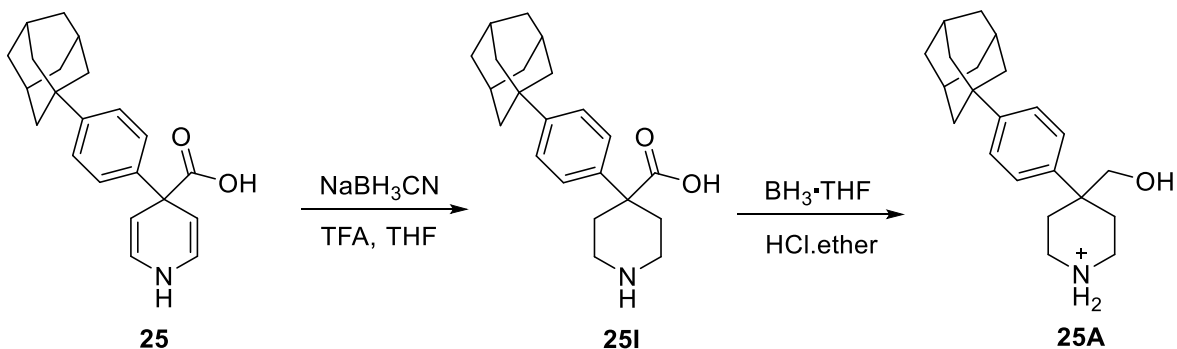

Following General Procedure B, the crude reaction mixture of **25** treated with  $\text{NaBH}_3\text{CN}$  (0.043 g, 2.7 mmol) and TFA (0.10 mL, 5.0 mmol) in THF (4.0 mL) afforded crude product **25I** as a sticky solid. Following General Procedure C, crude product **25I** dissolved in  $\text{BH}_3\text{-THF}$  (2.0 mL) afforded **25A** as a white solid (9.0 mg, 10% over 3 steps).

Data for **25A**:  $^1\text{H}$  NMR (400 MHz,  $\text{CD}_3\text{OD}$ )  $\delta$  7.39 (dd,  $J = 29.9, 8.6$  Hz, 4H), 3.45 (s, 2H), 3.35-3.26 (2H)\*, 3.00 – 2.83 (m, 2H), 2.43 (d,  $J = 14.4$  Hz, 2H), 2.12 (dd,  $J = 19.8, 7.5$  Hz, 5H), 1.94 (d,  $J = 2.6$  Hz, 6H), 1.82 (q,  $J = 12.2$  Hz, 6H).

$^{13}\text{C}$  NMR (126 MHz,  $\text{CD}_3\text{OD}$ )  $\delta$  151.25, 138.77, 127.92, 126.63, 72.38, 44.37, 42.82, 42.15, 37.88, 37.06, 30.46, 29.23

\*2H peak merging with CD<sub>3</sub>OD peak confirmed by COSY

HRMS (ESI): Expected mass [M<sup>+</sup>]: 326.2478; found: 326.2479.

Melting point = 256 °C

### Preparation of 26

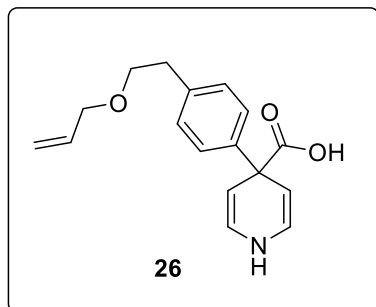

Following the General Procedure A with S31 (0.059 g, 0.25 mmol) afforded **26** as a white solid. The <sup>1</sup>H NMR yield was determined to be 45% with dibromomethane as the internal standard.

Data for **26**: <sup>1</sup>H NMR (600 MHz, CD<sub>3</sub>OD) δ 7.20 (d, *J* = 2.2 Hz, 4H), 7.01 (d, *J* = 8.6 Hz, 2H), 5.86 (ddd, *J* = 16.0, 10.6, 5.4 Hz, 1H), 5.30 (d, *J* = 8.6 Hz, 2H), 5.22 (dd, *J* = 17.25, 1.65 Hz, 1H), 5.12 (dd, *J* = 10.45, 1.33, 1H), 3.95 (d, *J* = 5.6 Hz, 2H), 3.62 (t, *J* = 6.9 Hz, 2H), 2.83 (t, *J* = 6.9 Hz, 2H).

<sup>13</sup>C NMR (126 MHz, CD<sub>3</sub>OD) δ 177.02, 154.03, 144.48, 139.05, 136.09, 130.29, 127.27, 117.18, 108.97, 72.78, 72.22, 51.19, 36.72.

### Preparation of 27

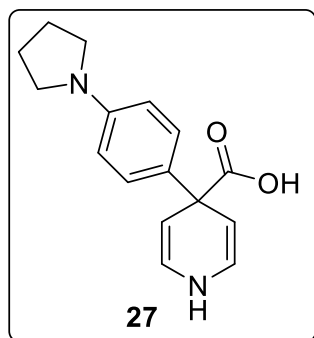

Following the General Procedure A with S18 (0.056 g, 0.25 mmol) afforded **27** as a yellow solid. The <sup>1</sup>H NMR yield was determined to be 35% with dibromomethane as the internal standard.

<sup>1</sup>H NMR (700 MHz, CD<sub>3</sub>OD) δ 7.08 (d, *J* = 8.8 Hz, 2H), 6.97 (d, *J* = 8.7 Hz, 2H), 6.54 (d, *J* = 8.8 Hz, 2H), 5.25 (d, *J* = 8.7 Hz, 2H), 3.26 – 3.23 (m, 4H), 2.01 – 1.99 (m, 4H).

**Note:** <sup>13</sup>C NMR and HRMS data of **27** could not be collected due to rapid re-aromatization.

### Preparation of 28

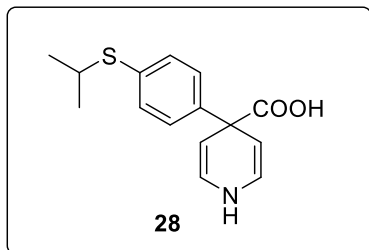

Following the General Procedure A with **S28** (0.057 g, 0.25 mmol) afforded **28** as a white solid. The  $^1\text{H}$  NMR yield was determined to be 41% with dibromomethane as the internal standard.

Data for **28**:  $^1\text{H}$  NMR (400 MHz,  $\text{CD}_3\text{OD}$ )  $\delta$  7.36 (d,  $J = 8.5$  Hz, 2H), 7.25 (d,  $J = 8.4$  Hz, 2H), 7.04 (d,  $J = 8.6$  Hz, 2H), 5.27 (d,  $J = 8.6$  Hz, 2H), 3.37 (dt,  $J = 13.4, 6.7$  Hz, 1H), 1.25 (d,  $J = 6.7$  Hz, 6H)

### Preparation of 28A

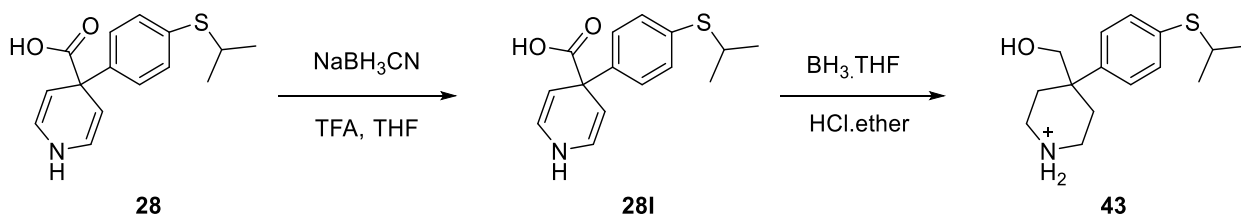

Following General Procedure B, the crude reaction mixture of **28** treated with  $\text{NaBH}_3\text{CN}$  (0.043 g, 2.7 mmol) and TFA (0.10 mL, 5.0 mmol) in THF (4.0 mL) afforded crude product **28I** as a sticky solid. Following General Procedure C, crude product **28I** dissolved in  $\text{BH}_3\text{-THF}$  (2.0 mL) afforded **43** as a white solid (0.025 g, 34% over 3 steps).

Data for **43**:  $^1\text{H}$  NMR (400 MHz,  $\text{CD}_3\text{OD}$ )  $\delta$  7.49 – 7.26 (m, 4H), 3.48 (s, 2H), 3.41 (dt,  $J = 13.3, 6.7$  Hz, 1H), 3.33 (2H)\*, 2.91 (td,  $J = 12.7, 2.7$  Hz, 2H), 2.41 (d,  $J = 14.9$  Hz, 2H), 2.13 (ddd,  $J = 15.4, 10.0, 3.8$  Hz, 2H), 1.28 (d,  $J = 6.7$  Hz, 6H).

$^{13}\text{C}$  NMR (176 MHz,  $\text{CD}_3\text{OD}$ )  $\delta$  140.63, 135.80, 132.95, 128.80, 71.95, 42.88, 42.05, 38.85, 29.24, 23.50.

\*2H peak merging with  $\text{CD}_3\text{OD}$  peak confirmed by COSY

HRMS (DART-MS): Expected mass  $[\text{M}+\text{H}^+]$ : 266.1573; found: 266.1571

Melting point = 161 °C

### Preparation of 29

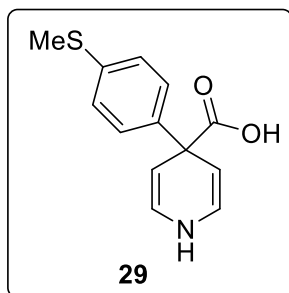

Following the General Procedure A with S7 (0.050 g, 0.25 mmol) afforded **29** as a white solid. The <sup>1</sup>H NMR yield was determined to be 57% with dibromomethane as the internal standard.

Data for **29**: <sup>1</sup>H NMR (600 MHz, CD<sub>3</sub>OD): δ 7.27 – 7.20 (m, 4H), 7.02 (d, *J* = 8.6 Hz, 2H), 5.27 (d, *J* = 8.6 Hz, 2H), 2.45 (s, 3H);

### Preparation of 47

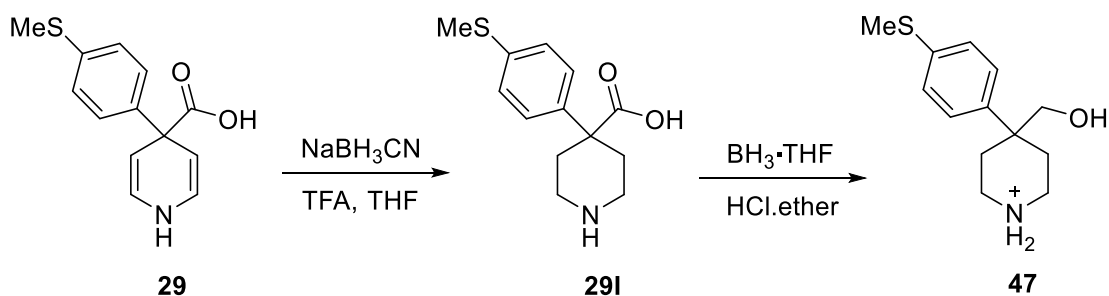

Following General Procedure B, the crude reaction mixture of **29** treated with NaBH<sub>3</sub>CN (0.043 g, 2.7 mmol) and TFA (0.10 mL, 5.0 mmol) in THF (4.0 mL) afforded crude product **29I** as a sticky solid. Following General Procedure C, crude product **29I** dissolved in BH<sub>3</sub>-THF (2.0 mL) afforded **47** as a white solid (0.011 g, 17 % over 3 steps).

Data for **47**: <sup>1</sup>H NMR (400 MHz, CD<sub>3</sub>OD): δ 7.33 (q, *J* = 8.8 Hz, 4H), 3.45 (s, 2H), 3.26 (m, 2H), 2.97-2.81 (m, 2H), 2.47 (s, 3H), 2.38 (d, *J* = 14.8 Hz, 2H), 2.17-1.97 (m, 2H).

<sup>13</sup>C NMR (126 MHz, CD<sub>3</sub>OD) δ 138.83, 138.76, 128.81, 128.12, 72.20, 42.88, 42.17, 29.53, 15.63.

HRMS (ESI): Expected mass [*M*<sup>+</sup>]: 238.126; found: 238.126.

Melting point = 219 °C

### Preparation of 30

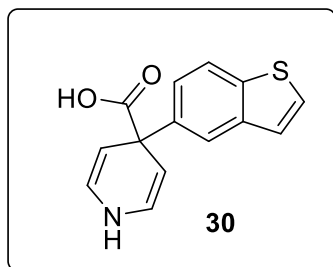

Following the General Procedure A with **S29** (0.052 g, 0.25 mmol) afforded **30** as a white solid. The  $^1\text{H}$  NMR yield was determined to be 41% with dibromomethane as the internal standard.

Data for **30**:  $^1\text{H}$  NMR (600 MHz,  $\text{CD}_3\text{OD}$ )  $\delta$  7.86 (d,  $J = 8.5$  Hz, 1H), 7.75 (d,  $J = 1.4$  Hz, 1H), 7.56 (d,  $J = 5.4$  Hz, 1H), 7.35 (d,  $J = 5.4$  Hz, 1H), 7.32 (dd,  $J = 8.5, 1.6$  Hz, 1H), 7.06 (d,  $J = 8.5$  Hz, 2H), 5.38 (d,  $J = 8.6$  Hz, 2H).

### Preparation of 41

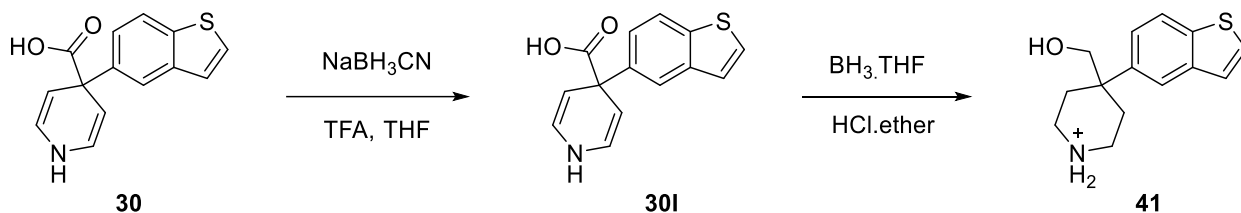

Following General Procedure B, the crude reaction mixture of **30** treated with  $\text{NaBH}_3\text{CN}$  (0.043 g, 2.7 mmol) and TFA (0.10 mL, 5.0 mmol) in THF (4.0 mL) afforded crude product **30I** as a sticky solid. Following General Procedure C, crude product **30I** dissolved in  $\text{BH}_3\text{-THF}$  (2.0 mL) afforded **41** as a white solid (0.027 g, 39 % over 3 steps).

Data for **41**:  $^1\text{H}$  NMR (600 MHz,  $\text{CD}_3\text{OD}$ )  $\delta$  7.93 (dd,  $J = 9.6, 5.0$  Hz, 2H), 7.58 (d,  $J = 5.4$  Hz, 1H), 7.45 – 7.32 (m, 2H), 3.54 (s, 2H), 3.33 (2H)\*, 2.93 (td,  $J = 12.7, 2.3$  Hz, 2H), 2.51 (d,  $J = 14.8$  Hz, 2H), 2.24 – 2.09 (m, 2H).

$^{13}\text{C}$  NMR (126 MHz,  $\text{CD}_3\text{OD}$ )  $\delta$  141.94, 139.69, 138.32, 128.18, 125.14, 124.36, 123.97, 123.59, 72.44, 43.23, 42.22, 29.87

\*2H peak merging with  $\text{CD}_3\text{OD}$  peak confirmed by COSY

HRMS (ESI): Expected mass [ $\text{M}^+$ ]: 248.1104; found: 248.1105.

Melting point = 245 – 148 °C

### Preparation of 31

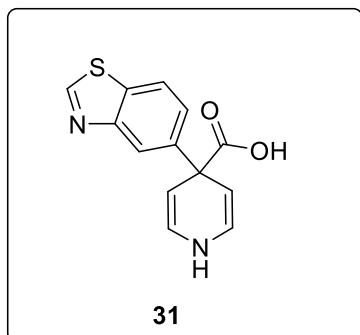

Following the General Procedure A with **S30** (0.053 g, 0.25 mmol) afforded **31** as a yellow solid. The  $^1\text{H}$  NMR yield was determined to be 45% with dibromomethane as the internal standard.

Data for **31**:  $^1\text{H}$  NMR (600 MHz,  $\text{CD}_3\text{OD}$ )  $\delta$  9.23 (s, 1H), 8.01 (dd,  $J = 15.2, 5.1$  Hz, 2H), 7.48 (dd,  $J = 8.5, 1.8$  Hz, 1H), 7.15 – 6.96 (m, 2H), 5.43 – 5.34 (m, 2H).

$^{13}\text{C}$  NMR (126 MHz,  $\text{CD}_3\text{OD}$ )  $\delta$  176.56, 154.44, 153.84, 145.64, 133.47, 125.42, 123.64, 123.46, 121.60, 108.65.

### Preparation of 32

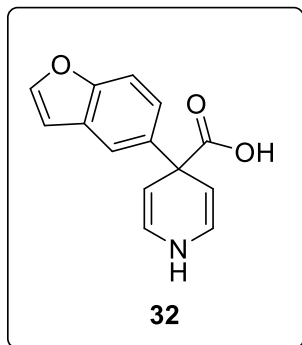

Following the General Procedure A with **S20** (0.048 g, 0.25 mmol) afforded **32** as a white solid. The  $^1\text{H}$  NMR yield was determined to be 57% with dibromomethane as the internal standard.

Data for **32**:  $^1\text{H}$  NMR (600 MHz,  $\text{CD}_3\text{OD}$ ):  $\delta$  7.73 (s, 1H), 7.54 (s, 1H), 7.46 (d,  $J = 8.7$  Hz, 1H), 7.26 (d,  $J = 8.7$  Hz, 1H), 7.04 (d,  $J = 8.3$  Hz, 2H), 6.82 (s, 1H), 5.37 (d,  $J = 8.3$  Hz, 2H);

### Preparation of 42

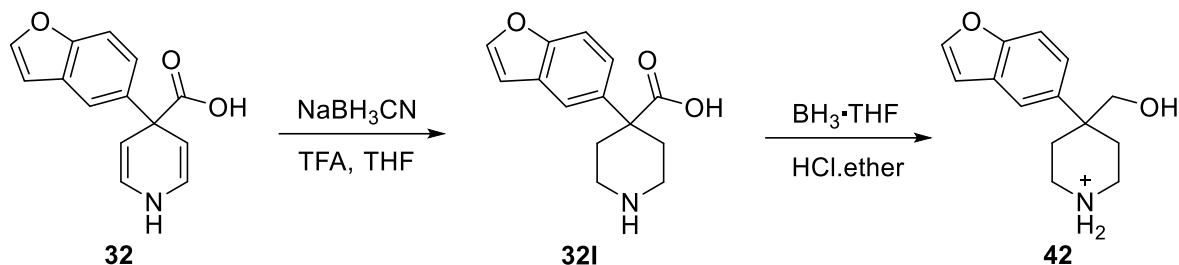

Following General Procedure B, the crude reaction mixture of **32** treated with  $\text{NaBH}_3\text{CN}$  (0.043 g, 2.7 mmol) and TFA (0.10 mL, 5.0 mmol) in THF (4.0 mL) afforded crude product **32I** as a sticky solid. Following General Procedure C, crude product **32I** dissolved in  $\text{BH}_3\cdot\text{THF}$  (2.0 mL) afforded **42** as a white solid (0.012 g, 18% over 3 steps).

Data for **42**:  $^1\text{H NMR}$  (400 MHz,  $\text{CD}_3\text{OD}$ )  $\delta$  7.76 (d,  $J = 2.0$  Hz, 1H), 7.70 (d,  $J = 1.7$  Hz, 1H), 7.54 (d,  $J = 8.7$  Hz, 1H), 7.37 (dd,  $J = 8.7, 1.7$  Hz, 1H), 6.86 (d,  $J = 2.0$  Hz, 1H), 3.36 (m, 2H), 3.52 (s, 2H), 2.96 (t,  $J = 11.7$  Hz, 2H), 2.51 (d,  $J = 14.7$  Hz, 2H), 2.24 – 2.13 (m, 2H).

$^{13}\text{C NMR}$  (176 MHz,  $\text{CD}_3\text{OD}$ )  $\delta$  155.27, 147.10, 136.32, 129.57, 124.29, 121.14, 112.53, 107.74, 72.51, 43.12, 42.10, 29.69.

HRMS (ESI): Expected mass [ $\text{M}^+$ ]: 232.1332; found: 232.1332.

Melting point = 227°C

### Preparation of 33

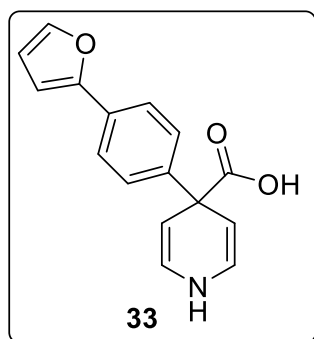

Following the General Procedure A with **S19** (0.055 g, 0.25 mmol) afforded **33** as a white solid. The  $^1\text{H NMR}$  yield was determined to be 80% with dibromomethane as the internal standard.

Data for **33**:  $^1\text{H NMR}$  (400 MHz,  $\text{CD}_3\text{OD}$ ):  $\delta$  7.65 (d,  $J = 8.5$  Hz, 2H), 7.52 (d,  $J = 1.4$  Hz, 1H), 7.35 – 7.29 (m, 2H), 7.05 (d,  $J = 8.6$  Hz, 2H), 6.72 (d,  $J = 3.3$  Hz, 1H), 6.48 (dd,  $J = 3.3, 1.8$  Hz, 1H), 5.29 (d,  $J = 8.6$

Hz, 2H).

### Preparation of 33A

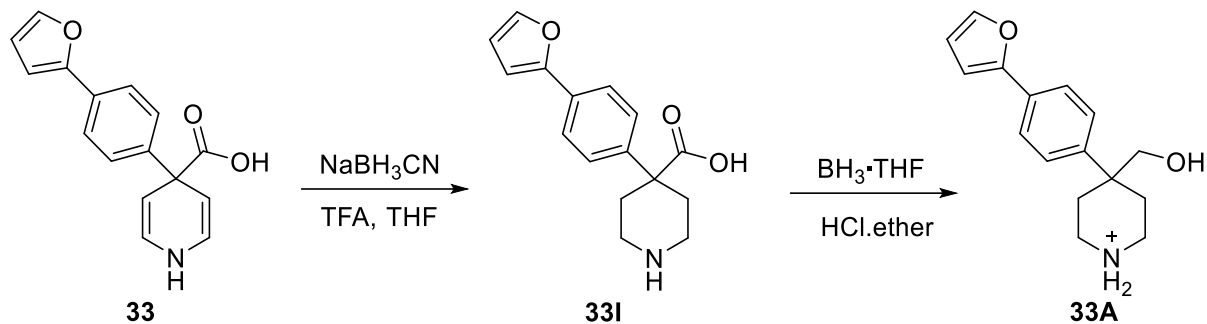

Following General Procedure B, the crude reaction mixture of **33** treated with  $\text{NaBH}_3\text{CN}$  (0.043 g, 2.7 mmol) and TFA (0.10 mL, 5.0 mmol) in THF (4.0 mL) afforded crude product **33I** as a sticky solid. Following General Procedure C, crude product **33I** dissolved in  $\text{BH}_3\text{-THF}$  (2.0 mL) afforded **33A** as a white solid (8.0 mg, 11% over 3 steps).

Data for **33A**:  $^1\text{H NMR}$  (400 MHz,  $\text{CD}_3\text{OD}$ )  $\delta$  7.74 (d,  $J = 8.5$  Hz, 2H), 7.55 (d,  $J = 1.3$  Hz, 1H), 7.46 (d,  $J = 8.5$  Hz, 2H), 6.77 (d,  $J = 3.3$  Hz, 1H), 6.51 (dd,  $J = 3.4, 1.8$  Hz, 1H), 3.51 (s, 2H), 3.36 (2H)\*, 2.94 (t,  $J = 11.5$  Hz, 2H), 2.45 (d,  $J = 14.7$  Hz, 2H), 2.21 – 2.05 (m, 2H).

$^{13}\text{C NMR}$  (126 MHz,  $\text{CD}_3\text{OD}$ )  $\delta$  154.86, 143.54, 141.12, 131.01, 128.68, 125.30, 112.78, 106.30, 72.08, 43.08, 42.14, 29.28.

\*2H peak merging with  $\text{CD}_3\text{OD}$  peak confirmed by COSY

HRMS (ESI): Expected mass [ $\text{M}^+$ ]: 258.1489; found: 258.1489.

Melting point = 236 °C



### Preparation of 34

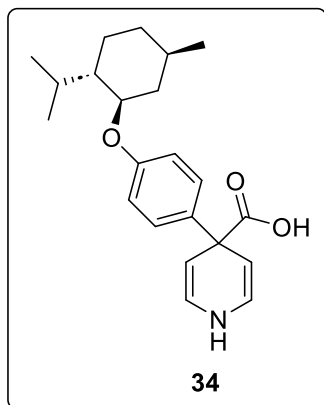

Following the General Procedure A with **S21** (0.077 g, 0.25 mmol) afforded **34** as a yellow solid. The  $^1\text{H}$  NMR yield was determined to be 35% with dibromomethane as the internal standard.

Data for **34**:  $^1\text{H}$  NMR (400 MHz,  $\text{CD}_3\text{OD}$ ):  $\delta$  7.19 (t,  $J = 11.0$  Hz, 2H), 7.10 – 6.94 (m, 2H), 6.92 – 6.75 (m, 2H), 5.52 – 5.08 (m, 2H), 4.28 – 3.94 (m, 1H), 2.37 – 2.04 (m, 2H), 1.94 – 1.58 (m, 2H), 1.62 – 1.34 (m, 2H), 1.30 – 1.05 (m, 1H), 1.06 – 0.84 (m, 8H), 0.78 (t,  $J = 8.4$  Hz, 3H)

### Preparation of 34A

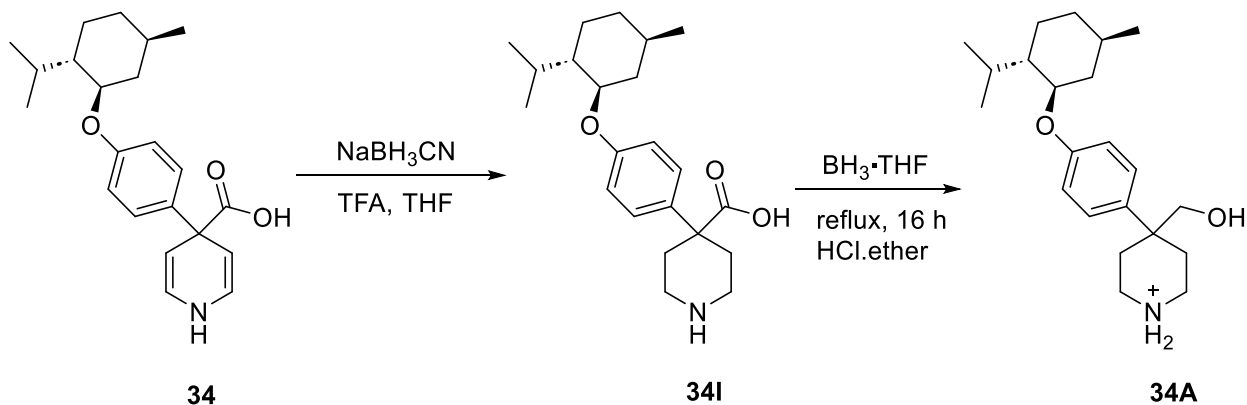

Following General Procedure B, the crude reaction mixture of **34** treated with  $\text{NaBH}_3\text{CN}$  (0.043 g, 2.7 mmol) and TFA (0.10 mL, 5.0 mmol) in THF (4.0 mL) afforded crude product **34I** as a sticky solid. Following General Procedure C, crude product **34I** dissolved in  $\text{BH}_3\cdot\text{THF}$  (4.0 mL) afforded **34A** as a white solid (0.010 g, 12% over 3 steps).

Data for **34A**:  $^1\text{H}$  NMR (400 MHz,  $\text{CD}_3\text{OD}$ )  $\delta$  7.30 (d,  $J = 8.8$  Hz, 2H), 6.95 (d,  $J = 8.7$  Hz, 2H), 4.11 (td,  $J = 10.5, 4.1$  Hz, 1H), 3.44 (s, 2H), 3.35-3.27 (2H)\*, 2.92 (t,  $J = 12.7$  Hz, 2H), 2.39 (d,  $J = 14.8$  Hz, 2H), 2.22 – 2.02 (m, 4H), 1.80 – 1.65 (m, 2H), 1.60 – 1.38 (m, 3H), 1.16 (ddd,  $J = 16.1, 13.5, 3.7$  Hz, 1H), 0.97 (dd,  $J = 12.4, 3.1$  Hz, 1H), 0.92 (dd,  $J = 6.8, 2.9$  Hz, 6H), 0.78 (d,  $J = 7.0$  Hz, 3H).

$^{13}\text{C}$  NMR (126 MHz,  $\text{CD}_3\text{OD}$ )  $\delta$  158.49, 133.28, 129.44, 117.03, 78.25, 72.45, 42.52, 42.10, 41.54, 35.73, 32.47, 29.33, 27.50, 24.94, 22.58, 21.09, 17.14

\* $^2\text{H}$  peak merging with  $\text{CD}_3\text{OD}$  peak confirmed by COSY

HRMS (ESI): Expected mass [ $\text{M}^+$ ]: 346.2741; found: 346.2742.

Melting point = 245 – 248  $^\circ\text{C}$

### Preparation of **35**

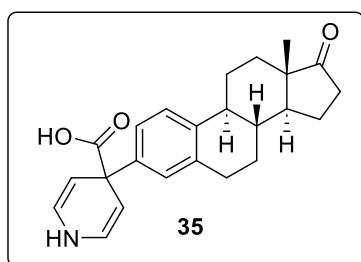

Following the General Procedure A with **S22** (0.082 g, 0.25 mmol) afforded **35** as a yellow solid. The  $^1\text{H}$  NMR yield was determined to be 44% with dibromomethane as the internal standard.

Data for **35**:  $^1\text{H}$  NMR (600 MHz,  $\text{CD}_3\text{OD}$ )  $\delta$  7.23 (d,  $J$  = 8.2 Hz, 2H), 7.03 (d,  $J$  = 8.2 Hz, 1H), 7.00 – 6.97 (m, 2H), 5.25 (d,  $J$  = 8.5 Hz, 2H), 3.05 – 2.95 (m, 1H), 2.95 – 2.81 (m, 2H), 2.52 – 2.36 (m, 2H), 2.24 (dd,  $J$  = 13.8, 7.0 Hz, 1H), 2.18 – 1.98 (m, 3H), 1.93 – 1.83 (m, 1H), 1.70 – 1.37 (m, 1H), 0.98 – 0.83 (m, 3H).

### Preparation of **45**

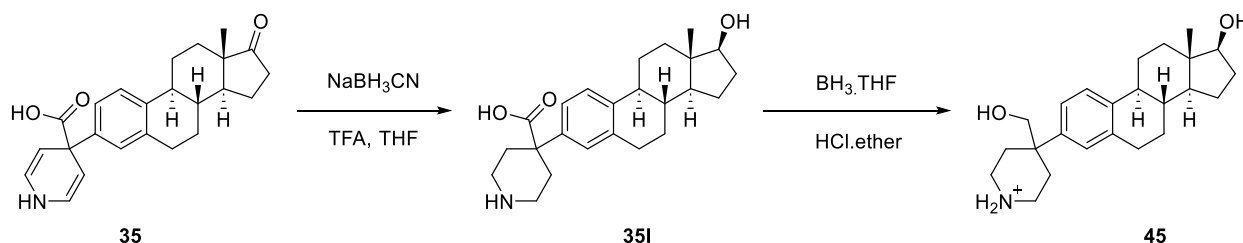

Following General Procedure B, the crude reaction mixture of **35** treated with  $\text{NaBH}_3\text{CN}$  (0.043 g, 2.7 mmol) and TFA (0.10 mL, 5.0 mmol) in THF (4.0 mL) afforded crude product **35I** as a sticky solid. Following General Procedure C, crude product **35I** dissolved in  $\text{BH}_3\text{-THF}$  (2.0 mL) afforded **45** as a white solid (0.031 g, 31% over 3 steps).

Data for **45**:  $^1\text{H NMR}$  (400 MHz,  $\text{CD}_3\text{OD}$ )  $\delta$  7.30 (d,  $J = 8.2$  Hz, 1H), 7.13 (d,  $J = 8.3$  Hz, 1H), 7.08 (s, 1H), 3.66 (t,  $J = 8.5$  Hz, 1H), 3.43 (s, 2H), 3.12 (d,  $J = 12.9$  Hz, 2H), 2.90 – 2.73 (m, 4H), 2.34 (ddd,  $J = 25.5, 14.7, 8.9$  Hz, 3H), 2.21 (td,  $J = 11.3, 4.0$  Hz, 1H), 2.10 – 1.87 (m, 4H), 1.71 (ddd,  $J = 11.9, 10.8, 3.1$  Hz, 1H), 1.59 – 1.13 (m, 8H), 0.77 (s, 3H).

$^{13}\text{C NMR}$  (126 MHz,  $\text{CD}_3\text{OD}$ )  $\delta$  139.89, 138.14, 128.81, 126.89, 125.53, 82.47, 72.71, 66.93, 51.42, 45.65, 44.40, 43.02, 42.55, 40.31, 38.06, 30.84, 30.76, 28.55, 27.42, 24.10, 15.51, 11.75.

HRMS (ESI): Expected mass [ $\text{M}^+$ ]: 370.2741; found: 370.2741.

Melting point = 258 – 260  $^\circ\text{C}$

### *Stereochemical assignment for 45*

Analysis of 2D ROESY of **45** supported the indicated stereochemistry.

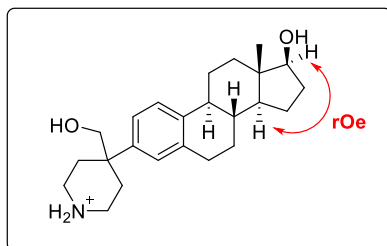

### *Preparation of 36*

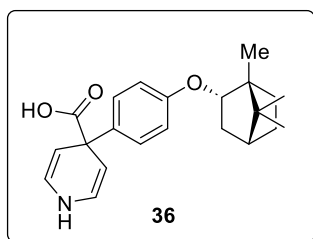

Following the General Procedure A with **S23** (0.076 g, 0.25 mmol) afforded **36** as a yellow solid. The  $^1\text{H NMR}$  yield was determined to be 38% with dibromomethane as the internal standard.

Data for **36**:  $^1\text{H NMR}$  (400 MHz,  $\text{CD}_3\text{OD}$ )  $\delta$  7.16 (d,  $J = 8.5$  Hz, 2H), 6.99 (d,  $J = 8.1$  Hz, 2H), 6.80 (d,  $J = 8.5$  Hz, 2H), 5.27 (d,  $J = 8.0$  Hz, 2H), 4.35 (d,  $J = 8.2$  Hz, 1H), 2.46 – 2.36 (m, 1H), 2.27 – 2.18 (m, 1H), 1.75 (ddd,  $J = 23.4, 11.8, 8.0$  Hz, 2H), 1.40 – 1.18 (m, 3H), 1.06 – 0.96 (m, 3H), 0.96 – 0.89 (m, 6H).

### Preparation of 44

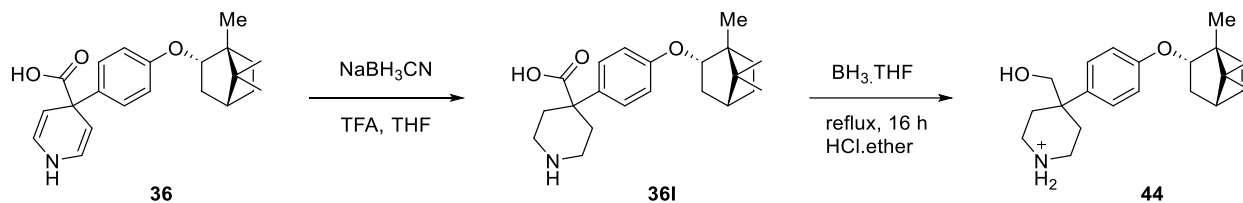

Following General Procedure B, the crude reaction mixture of **36** treated with  $\text{NaBH}_3\text{CN}$  (0.043 g, 2.7 mmol) and TFA (0.10 mL, 5.0 mmol) in THF (4.0 mL) afforded crude product **36I** as a sticky solid. Following General Procedure C, crude product **36I** dissolved in  $\text{BH}_3$ -THF (4.0 mL) afforded **44** as a white solid (0.017 g, 19 % over 3 steps).

Data for **44**:  $^1\text{H NMR}$  (400 MHz,  $\text{CD}_3\text{OD}$ )  $\delta$  7.30 (d,  $J = 8.8$  Hz, 2H), 6.90 (d,  $J = 8.8$  Hz, 2H), 4.43 – 4.28 (m, 1H), 3.44 (s, 2H), 3.35-3.26 (2H)\*, 2.92 (t,  $J = 11.9$  Hz, 2H), 2.44 (ddd,  $J = 27.8, 15.3, 9.5$  Hz, 3H), 2.30 – 2.20 (m, 1H), 2.17 – 2.04 (m, 2H), 1.81 (ddd,  $J = 12.0, 7.8, 3.5$  Hz, 1H), 1.73 (t,  $J = 4.5$  Hz, 1H), 1.37 (td,  $J = 12.0, 2.7$  Hz, 1H), 1.31 – 1.16 (m, 1H), 1.04 (dd,  $J = 13.3, 3.3$  Hz, 1H), 0.99 (s, 3H), 0.94 (d,  $J = 7.9$  Hz, 6H).

$^{13}\text{C NMR}$  (126 MHz,  $\text{CD}_3\text{OD}$ )  $\delta$  159.31, 133.05, 129.28, 116.91, 84.03, 72.46, 50.48, 46.59, 42.52, 42.10, 37.93, 29.31, 28.95, 27.80, 20.15, 19.35, 14.10.

\* 2H peaks are merged with  $\text{CD}_3\text{OD}$  peak confirmed by COSY

HRMS (ESI): Expected mass [ $\text{M}^+$ ]: 344.2584; found: 344.2584.

Melting point = 223 °C

### Preparation of 37

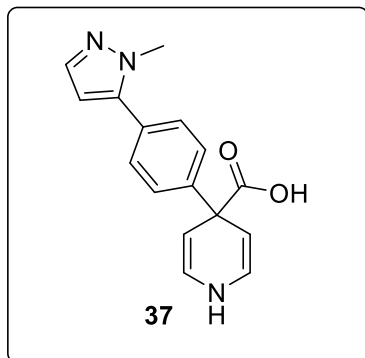

Following the General Procedure A with S34 (0.058 g, 0.25 mmol) afforded **37** as a white solid. The  $^1\text{H}$  NMR yield was determined to be 15% with dibromomethane as the internal standard.

Data for **37**:  $^1\text{H}$  NMR (500 MHz,  $\text{CD}_3\text{OD}$ )  $\delta$  7.45 (m, 5H), 7.07 (d,  $J = 8.1$  Hz, 2H), 6.34 (s, 1H), 5.32 (d,  $J = 8.1$  Hz, 2H), 3.84 (s, 3H).

Note:  $^{13}\text{C}$  NMR and HRMS data of 45 could not be collected due to rapid re-aromatization.

### Preparation of 59

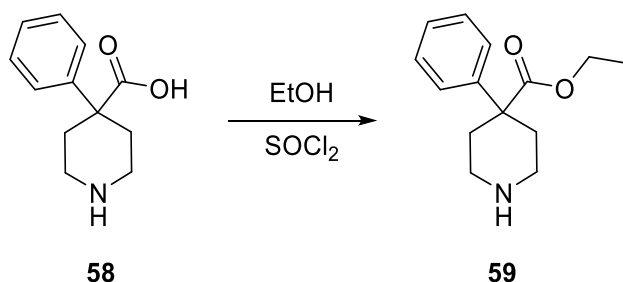

To a solution of crude **58** (0.18 g, 0.90 mmol, 1.0 equiv.) in EtOH (1.5 mL) thionyl chloride (0.26 mL, 3.6 mmol, 4.0 equiv) was added at  $0^\circ\text{C}$ . The reaction mixture was refluxed for 7 h, followed by concentration of the reaction mixture in vacuo. The resulting mixture was washed with 10% NaOH and extracted with DCM three times. The organic layers were combined and evaporated to obtain the product as a crude mixture which was purified using flash chromatography by priming the column using 10%  $\text{Et}_3\text{N}$  in hexane and using 10% MeOH/DCM as eluent (0.11 g, 52% yield) to afford **59** as light yellow oil.

Data for **59**:  $^1\text{H}$  NMR (400 MHz,  $\text{CD}_3\text{OD}$ )  $\delta$  7.42 – 7.30 (m, 4H), 7.25 (ddd,  $J = 7.1, 3.9, 1.3$  Hz, 1H), 4.13 (q,  $J = 7.1$  Hz, 2H), 3.05 (dt,  $J = 13.4, 3.7$  Hz, 2H), 2.85 – 2.73 (m, 2H), 2.55 (d,  $J = 13.4$  Hz, 2H), 1.17 (t,  $J = 7.1$  Hz, 3H).

$^{13}\text{C}$  NMR (126 MHz,  $\text{CD}_3\text{OD}$ )  $\delta$  175.69, 143.99, 129.71, 128.28, 126.76, 62.20, 50.46, 44.39, 34.84, 14.31

HRMS (ESI): Expected mass  $[M+H^+]$ : 234.1489; found: 234.1487

**Preparation of 56**

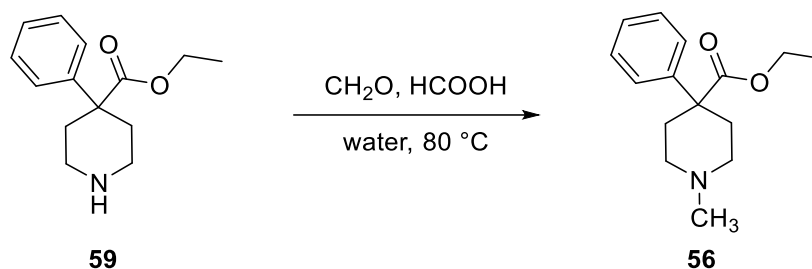

To a solution of amine **59** (0.042 g, 0.18 mmol) in water (0.50 mL) was added formic acid (24  $\mu\text{L}$ , 3.6 equiv) and 37% aqueous  $\text{CH}_2\text{O}$  (32  $\mu\text{L}$ , 2.2 equiv). The mixture was heated at  $80\text{ }^\circ\text{C}$  for 18 h. After completion, reaction was cooled down and 1M HCl was added and extracted with DCM. The aqueous phase was basified to pH 11 using 3N NaOH and again extracted with DCM. This organic layer was evaporated under reduced pressure to obtain the crude product which was purified using flash chromatography to obtain the pure compound (0.022 g, 50% yield) as colourless oil.

Data for **56**:  $^1\text{H NMR}$  (400 MHz,  $\text{CDCl}_3$ )  $\delta$  7.42 – 7.36 (m, 2H), 7.35 – 7.29 (m, 2H), 7.27 – 7.19 (m, 1H), 4.13 (q,  $J = 7.1$  Hz, 2H), 2.76 (t,  $J = 21.3$  Hz, 2H), 2.58 (d,  $J = 12.8$  Hz, 2H), 2.27 (s, 3H), 2.15 (dd,  $J = 22.1, 10.6$  Hz, 2H), 1.98 (t,  $J = 11.1$  Hz, 2H), 1.18 (t,  $J = 7.1$  Hz, 3H).

$^{13}\text{C NMR}$  (126 MHz,  $\text{CDCl}_3$ )  $\delta$  174.40, 143.01, 128.51, 126.95, 125.82, 60.81, 53.61, 48.79, 46.34, 34.04, 14.09.

HRMS (ESI): Expected mass  $[M+H^+]$ : 248.1645; found: 248.1643

### Deuterium labelling experiment

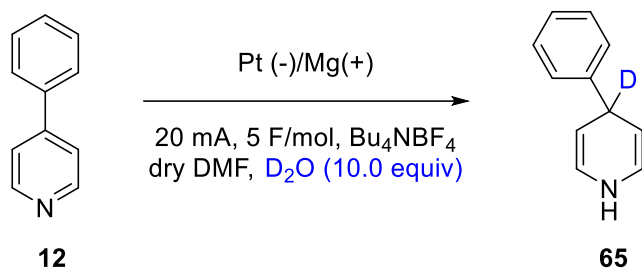

A 5 mL dry ElectraSyn vial was charged with 4-phenylpyridine **12** and tetrabutylammonium tetrafluoroborate (0.25 mmol, 1.0 equiv.) in dry DMF (2.5 – 3.0 mL). Added to this solution was D<sub>2</sub>O (45 μL, 10.0 equiv) and mixed well. The vial was then capped with an ElectraSyn vial cap equipped with a platinum cathode and a magnesium anode and the reaction mixture was stirred until it became homogenous. Electrolysis was performed at 20 mA current and 5 F/mol charge. After completion of the electrolysis, the contents of the vial were transferred to a separatory funnel and the electrodes were rinsed with ethyl acetate (ca. 2 mL) and the aqueous layer was extracted using ethyl acetate (10 mL). The organic layer was washed several times with ice cold water (~100 mL×5) to remove the existing DMF. The organic layers were dried over Na<sub>2</sub>SO<sub>4</sub>, filtered, concentrated under reduced pressure to obtain the crude product of **65** with 75% D incorporation. Due to instability of the compound, purification was not performed and <sup>1</sup>H NMR of crude was obtained (**Figure S2**).

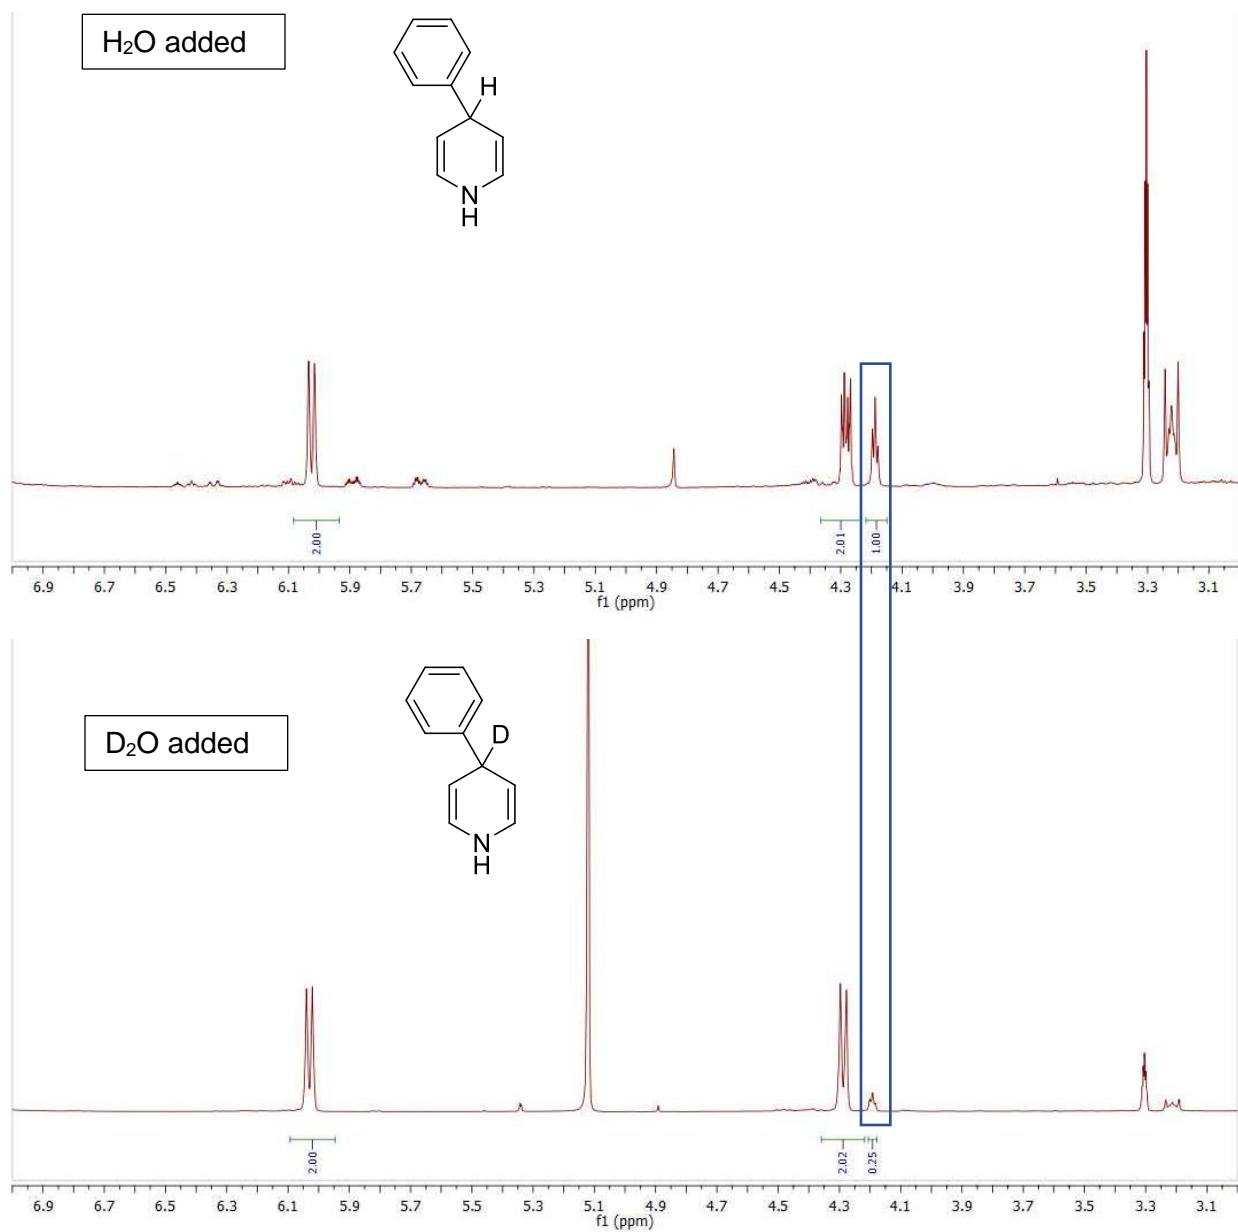

**Figure S2:** Crude <sup>1</sup>H NMR of D labelling experiment when H<sub>2</sub>O and D<sub>2</sub>O are added to the reaction (Crude NMR's taken in CD<sub>3</sub>OD solvent and 400 MHz instrument)



## Cyclic Voltammetry (CV) studies

The cyclic voltammogram were recorded on Pine Instruments model AFCBP1 potentiostat. The measurement cell equipped with a 3 mm glassy carbon disk as the working electrode, a platinum coated plate as the counter electrode, and an Ag/AgCl reference electrode was used. The results were recorded using DMF (6.0 mL) as solvent,  $\text{Bu}_4\text{NBF}_4$  (0.08 M) as the supporting electrolyte. The results were recorded under ambient air conditions at room temperature, sweeping reductively from the initial potential of -1 V to the final potential of -1 V in the scan rate of  $120 \text{ mVs}^{-1}$ . Prior to use, the solvent DMF was deoxygenated by nitrogen bubbling for 0.5 h. And the glassy carbon working electrode was polished with alumina powder before every use.

### CV Specifications:

Segments: 3

Initial potential: -1 V

Upper potential: -0.9 V

Lower potential: -2.7 V

Final potential: -1 V

Sweep rate:  $120 \text{ mV/s}$

Current: 1 mA

### Figure S3:

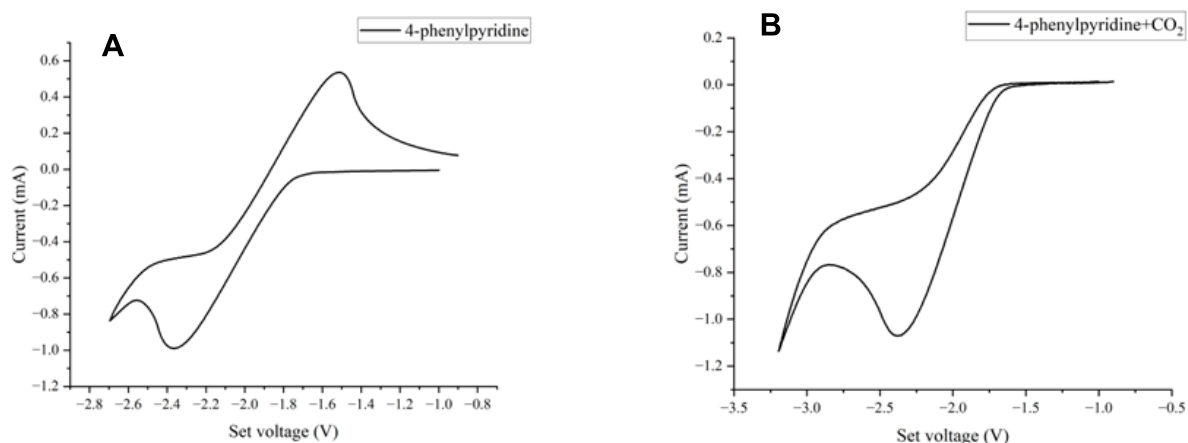

**A)** Cyclic voltammetry of 4-phenylpyridine (0.08 M) in DMF as solvent and  $\text{Bu}_4\text{NBF}_4$  (0.08 M) as electrolyte **B)** Cyclic voltammetry of 4-phenylpyridine (0.08 M) in DMF as solvent and

Bu<sub>4</sub>NBF<sub>4</sub> (0.08 M) as electrolyte and CO<sub>2</sub> gas was purged into it for 20 minutes prior to CV measurements.

**General procedure (GP- D) for electrochemical dearomative - carboxylation of 4-aryl pyridine N-oxides**

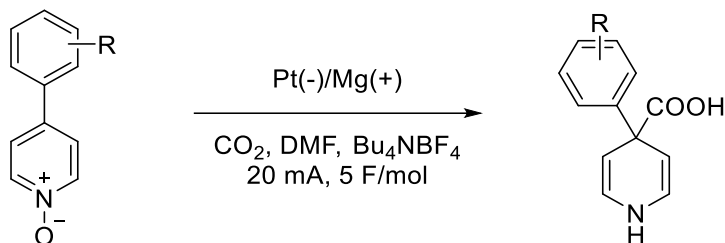

A 5 mL ElectraSyn vial was charged with 4-(hetero)arylpyridine N-oxide and tetrabutylammonium tetrafluoroborate (0.25 mmol, 1.0 equiv.) in DMF (2.5 – 3.0 mL). The vial was then capped with an ElectraSyn vial cap equipped with a platinum cathode and a magnesium anode and the reaction mixture was stirred until it became homogenous. A balloon filled with CO<sub>2</sub> was used to bubble CO<sub>2</sub> into the reaction mixture prior to starting the reaction and then continued for the duration of the electrolysis. Electrolysis was performed at 20 mA current and 5 F/mol charge. Following electrolysis, the ElectraSyn vial cap was removed and 3M HCl was added dropwise with stirring into the reaction mixture until solution becomes transparent. The content of the vial was transferred to a separatory funnel and the electrodes were rinsed with ethyl acetate (ca. 2 mL) and the aqueous layer was extracted using ethyl acetate (10 mL). The organic layer was washed several times with ice cold water (~100 mL x 5) to remove the existing DMF. The organic layers were dried over Na<sub>2</sub>SO<sub>4</sub>, filtered, concentrated under reduced pressure to obtain the crude product.

*Preparation of 21 from N-oxide of 4-phenyl pyridine*

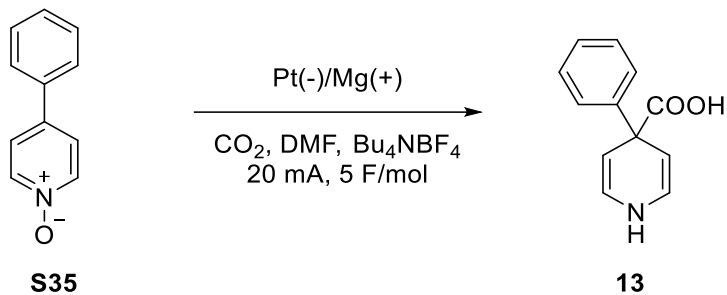

Following GP-D, using *N*-oxide **S35** (0.042 g, 0.25 mmol, 1.0 equiv), Bu<sub>4</sub>NBF<sub>4</sub> (0.082 g, 0.25 mmol, 1.0 equiv) was subjected to electrochemical conditions to afford the product **13** in 47% NMR yield.

*Preparation of 29 from S36*

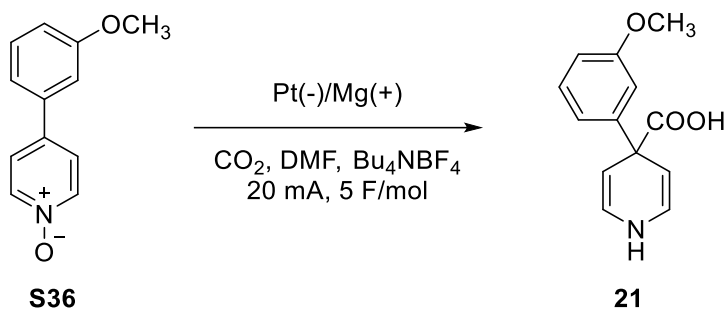

Following GP-D, using *N*-oxide **S36** (0.050 g, 0.25 mmol, 1.0 equiv), Bu<sub>4</sub>NBF<sub>4</sub> (0.082 g, 0.25 mmol, 1.0 equiv) was subjected to electrochemical conditions to afford the product **21** in 48% NMR yield.

*Preparation of 32 from S37*

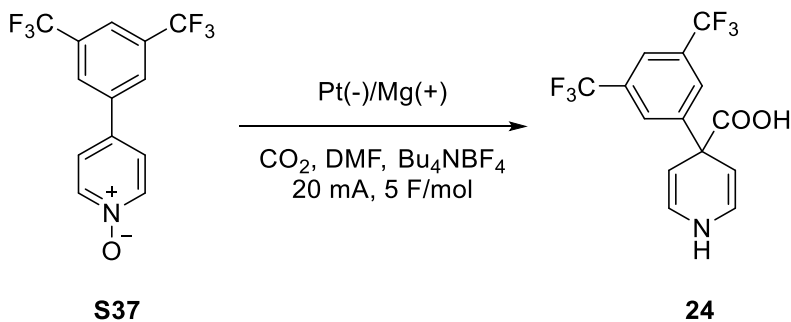

Following GP-D, using *N*-oxide **S37** (0.076 g, 0.25 mmol, 1.0 equiv), Bu<sub>4</sub>NBF<sub>4</sub> (0.082 g, 0.25 mmol, 1.0 equiv) was subjected to electrochemical conditions to afford the product **24** in 52% NMR yield.

### Scale-up of reductive electrochemical carboxylation

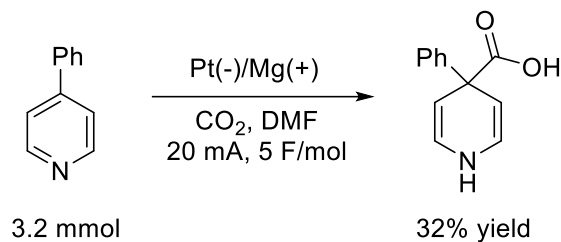

A 20 mL ElectraSyn vial was charged with 4-phenylpyridine (0.5 g, 3.2 mmol, 1.0 equiv.) and tetrabutylammonium tetrafluoroborate (1.05 g, 3.2 mmol, 1.0 equiv.) in DMF (18.0 mL). The vial was then capped with an ElectraSyn vial cap equipped with a platinum cathode and a magnesium anode and the reaction mixture was stirred until it became homogenous. A CO<sub>2</sub> cylinder was connected using a tubing attached to a needle which was dipped into the reaction mixture and CO<sub>2</sub> was bubbled at moderate rate (**Figure S4.B**). Electrolysis was performed at 20 mA current and 5 F/mol charge. Following electrolysis, the ElectraSyn vial cap was removed and 3M HCl was added dropwise with stirring into the reaction mixture until solution becomes transparent. The content of the vial was transferred to a separatory funnel and the electrodes were rinsed with ethyl acetate (ca. 2 mL) and the aqueous layer was extracted using ethyl acetate. The organic layer was washed several times with ice cold water (~100 mL<sup>x</sup>5) to remove the existing DMF. The organic layers were dried over Na<sub>2</sub>SO<sub>4</sub>, filtered, concentrated under reduced pressure to obtain the crude product.

The crude product was purified by making a suspension of it in DCM followed by adding hexane, which results in precipitation of the product. The precipitate is then filtered using a Buchner funnel and the residue was washed thoroughly with DCM to obtain the pure product (0.21 g, 32%).

### Graphical guide:

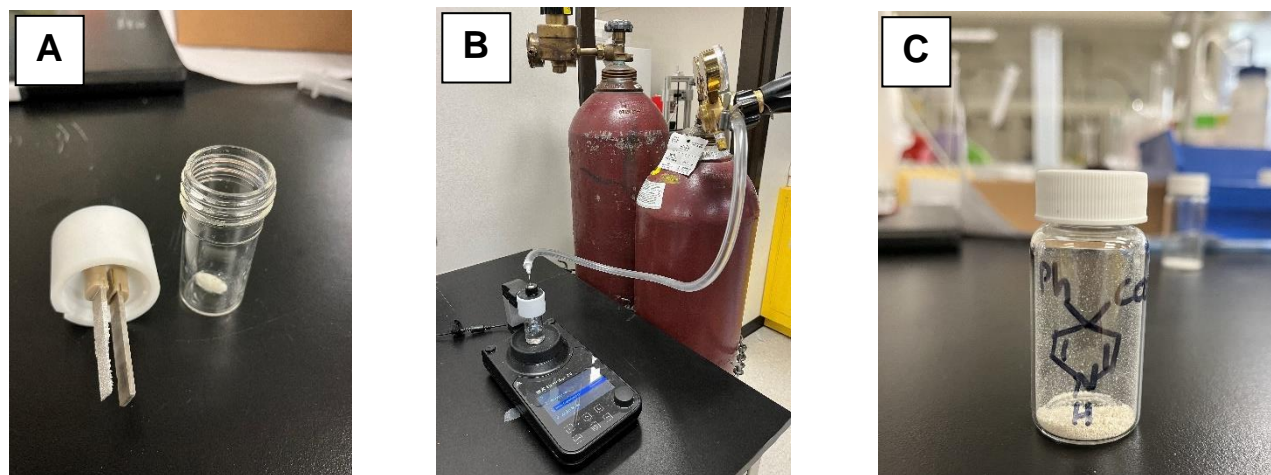

**Figure S4:** A) Electrodes (Mg as anode and Pt as cathode) and 20 mL vial with a stir bar; B) Large scale electrochemical set up; C) Product obtained after reaction

### References:

1. R.K. Neff, Y-L. Su, S. Liu, M. Rosado, X. Zhang, M.P. Doyle *J. Org. Chem.* 2022, **87**, 7975–7988
2. L.R. Mills, J.M. Graham, P. Patel, S.A.L. Rousseaux *J. Am. Chem. Soc.* 2019, **141**, 19257–19262
3. H. Okada, Y. Sasano, E. Kwon, Y. Matsuo, Y. Iwabuchi *Chem. Commun.*, 2023, **59**, 1237-1240
4. H. Yu, J. Li, S. Li, Y. Liu, N.E. Jackson, J.S. Moore, C.M. Schroeder *J. Am. Chem. Soc.* 2023, **145**, 18800–18811
5. M. Feuerstein, H. Doucet, M. Santelli *J. Organomet. Chem.*, 2003, **687**, 327 – 336
6. K. Ueda, H. Umihara, S. Yokoshima, T. Fukuyama *Org. Lett.* 2015, **17**, 3191–3193
7. A. Noble, D.W.C. MacMillan *J. Am. Chem. Soc.* 2014, **136**, 11602–11605
8. S. Das, A.W. Ehlers, S. Patra, B. de Bruin, B. Chattopadhyay *J. Am. Chem. Soc.* 2023, **145**, 14599-14607
9. J. Yan, J-F. Poon, V.P. Singh, P. Gates, L. Engman *Org. Lett.* 2015, **17**, 6162–6165
10. P. Xu, F. Wang, G. Fan, X. Xu, P. Tang *Angew. Chem. Int. Ed*, 2017, **129**, 1121-1124
11. H. L. Ozores, M. Amorín, J. R. Granja. *J. Am. Chem. Soc.* 2017, **139**, 776-784

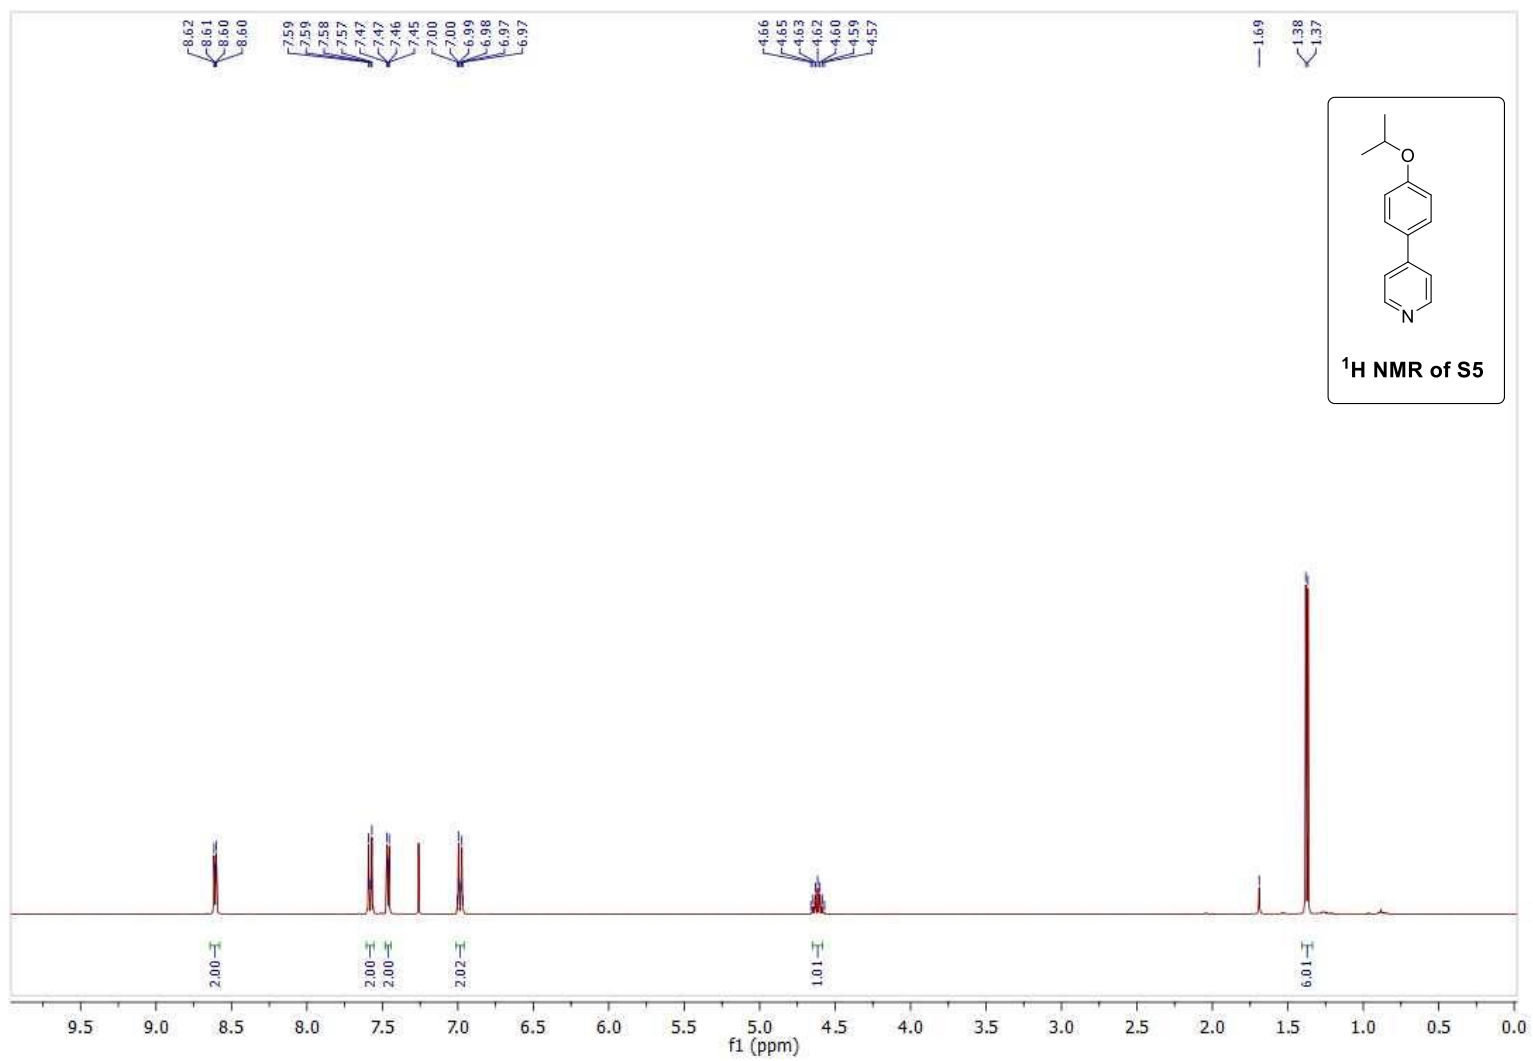

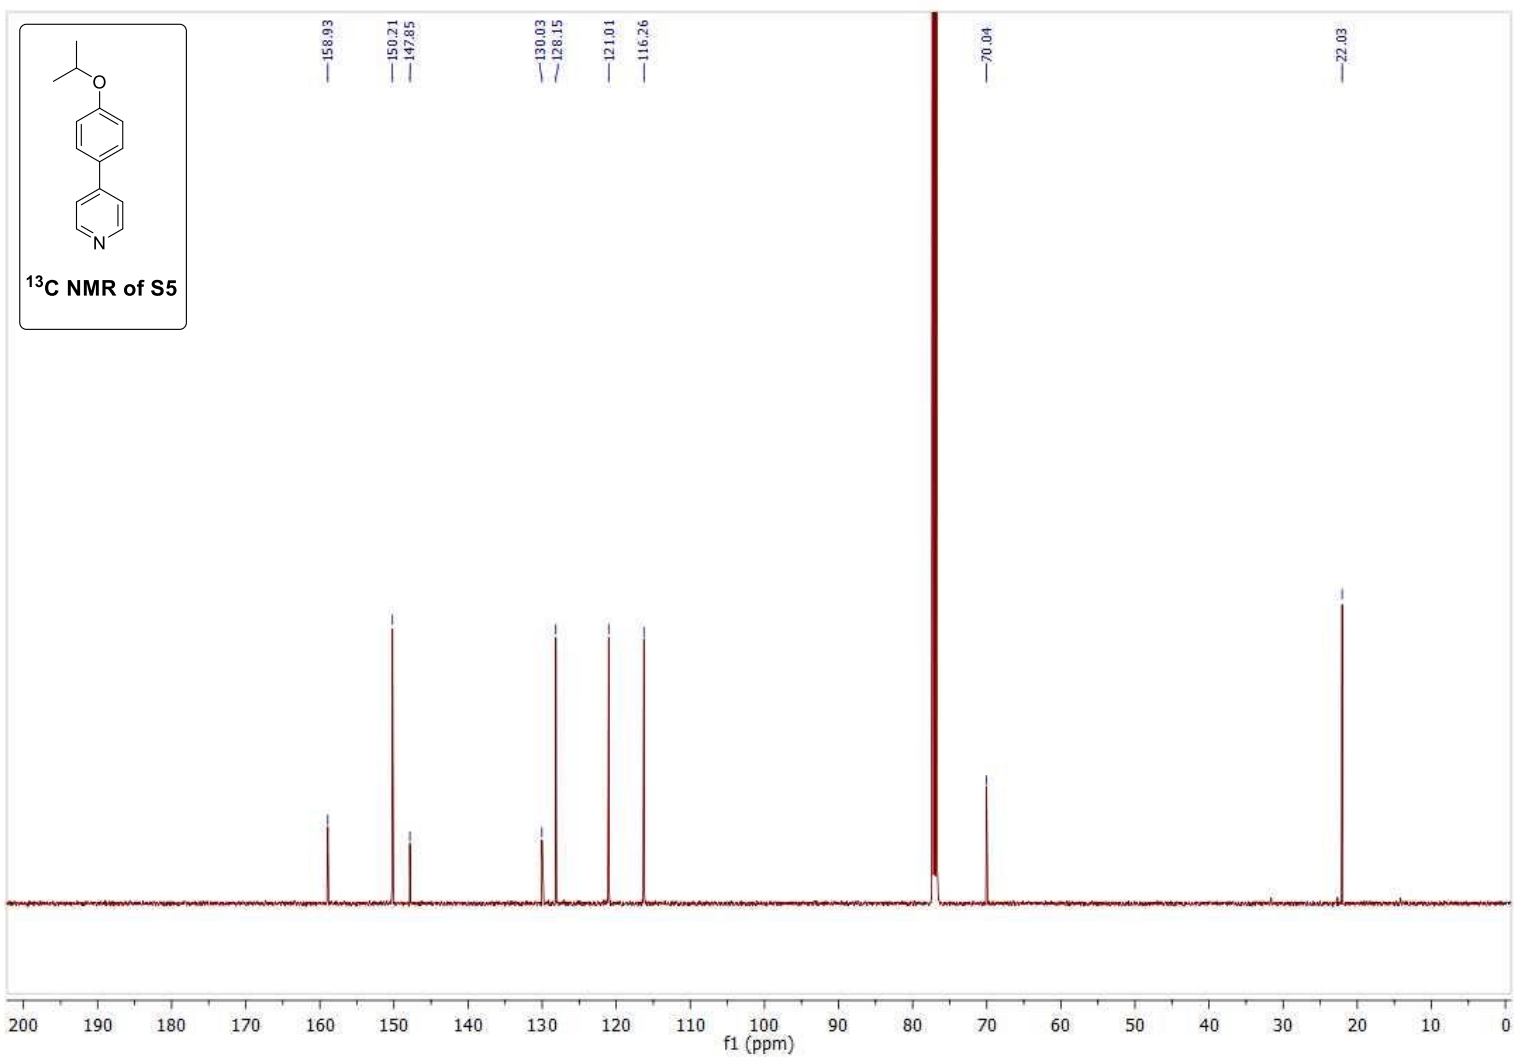

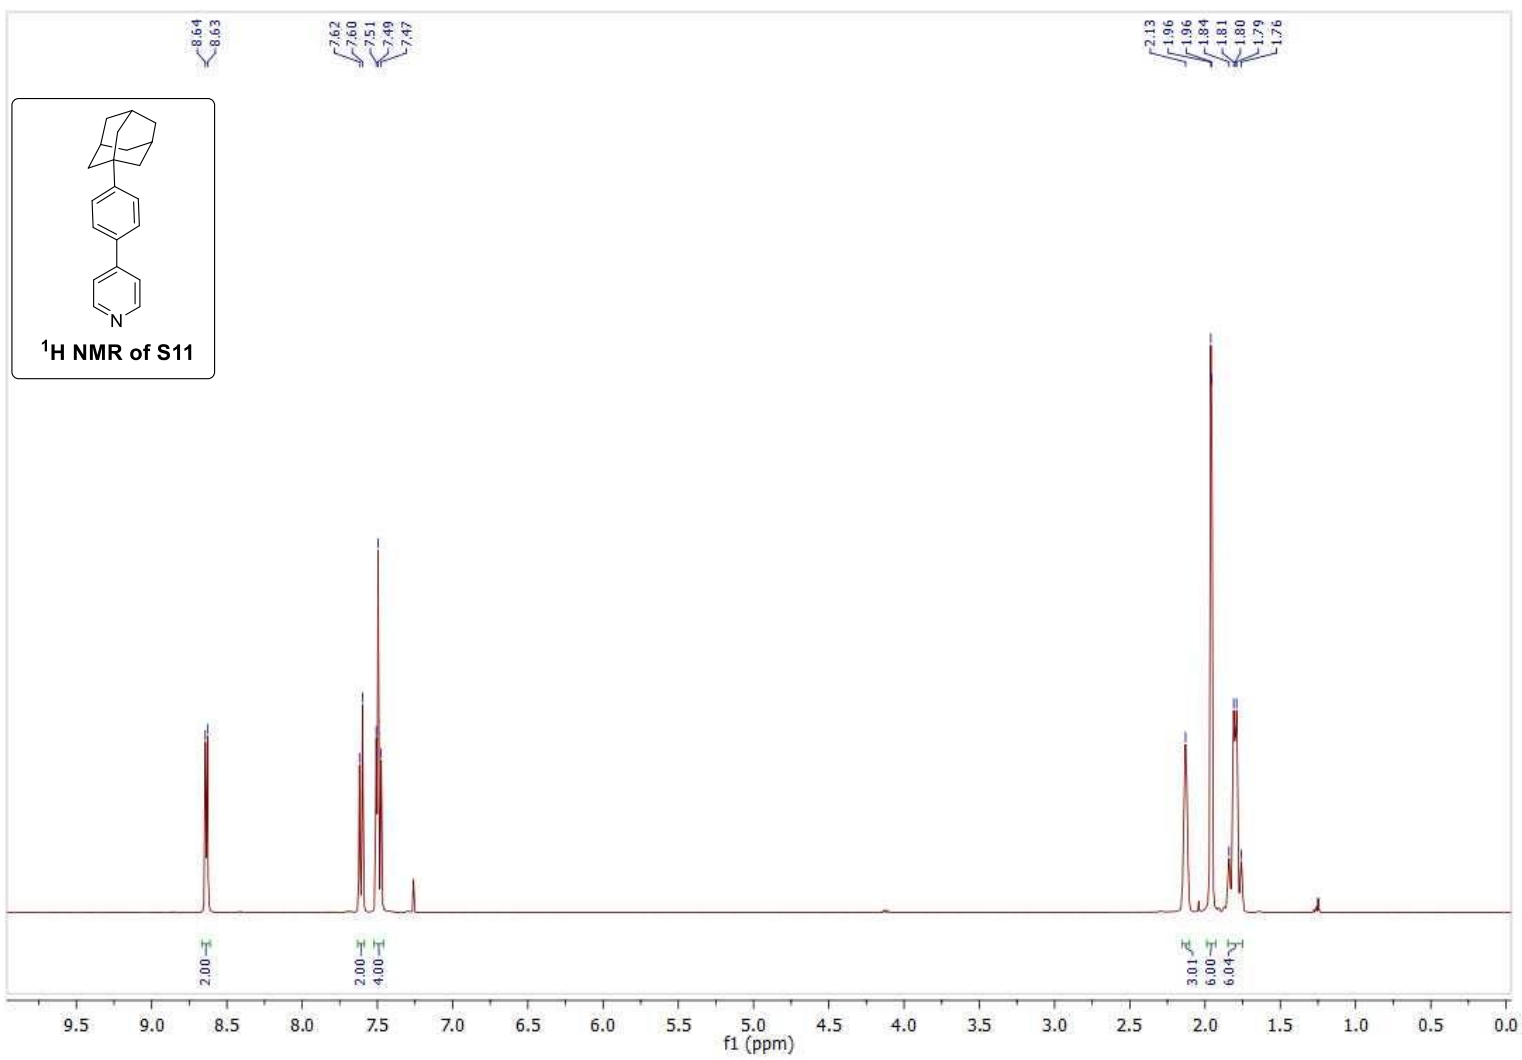



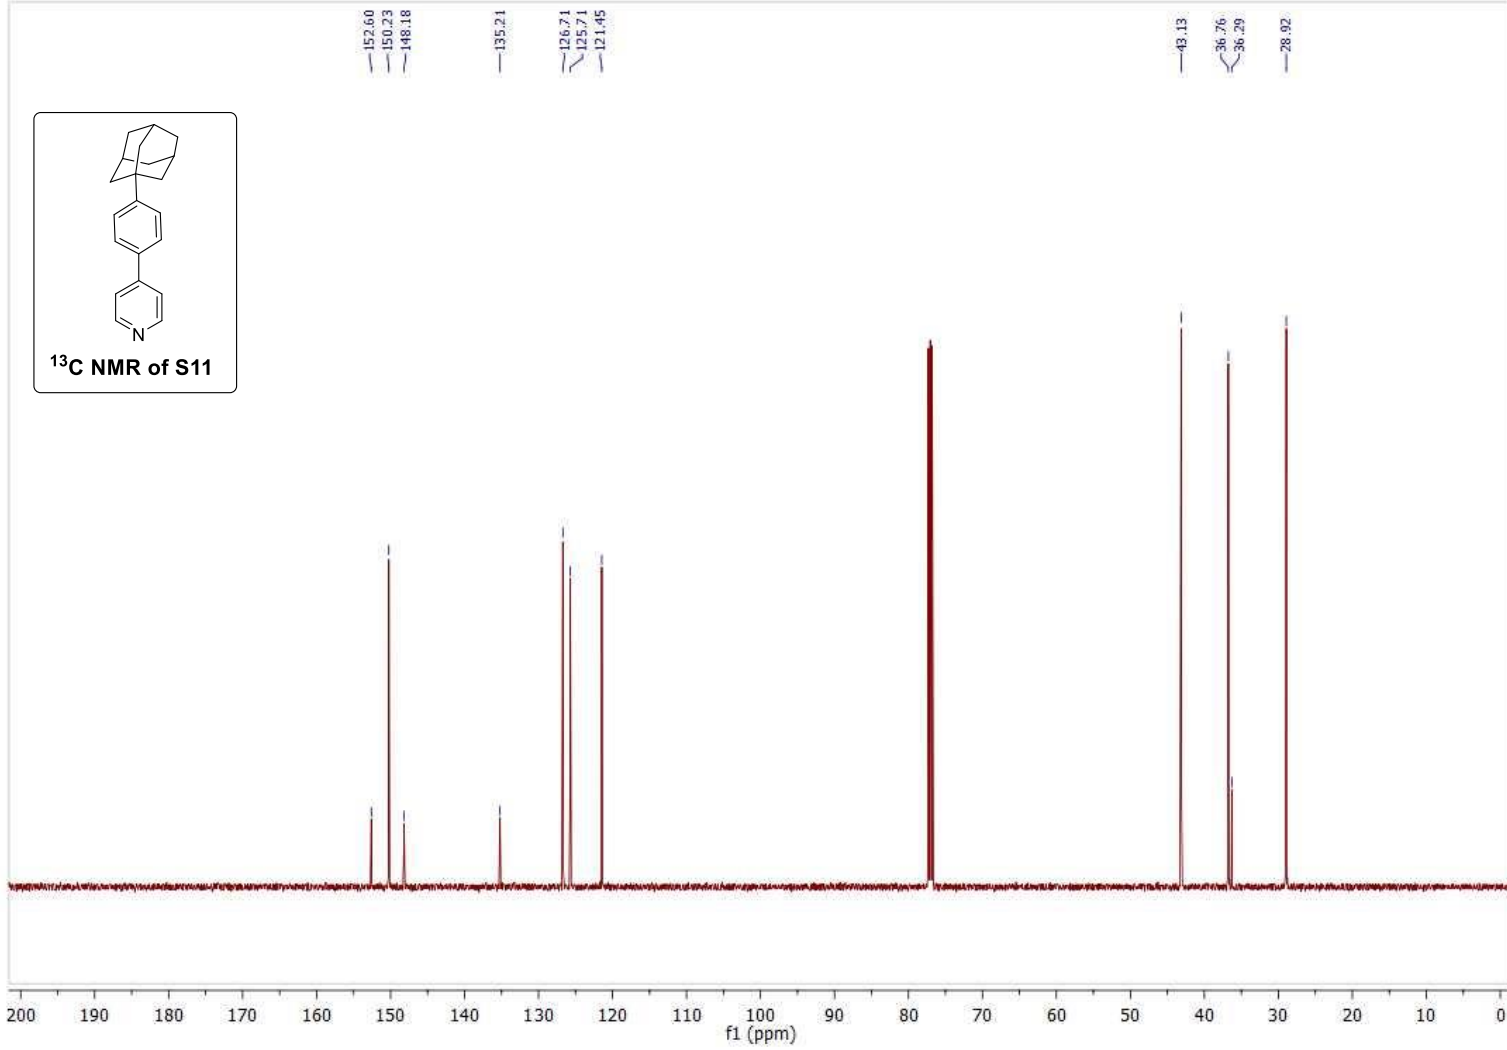

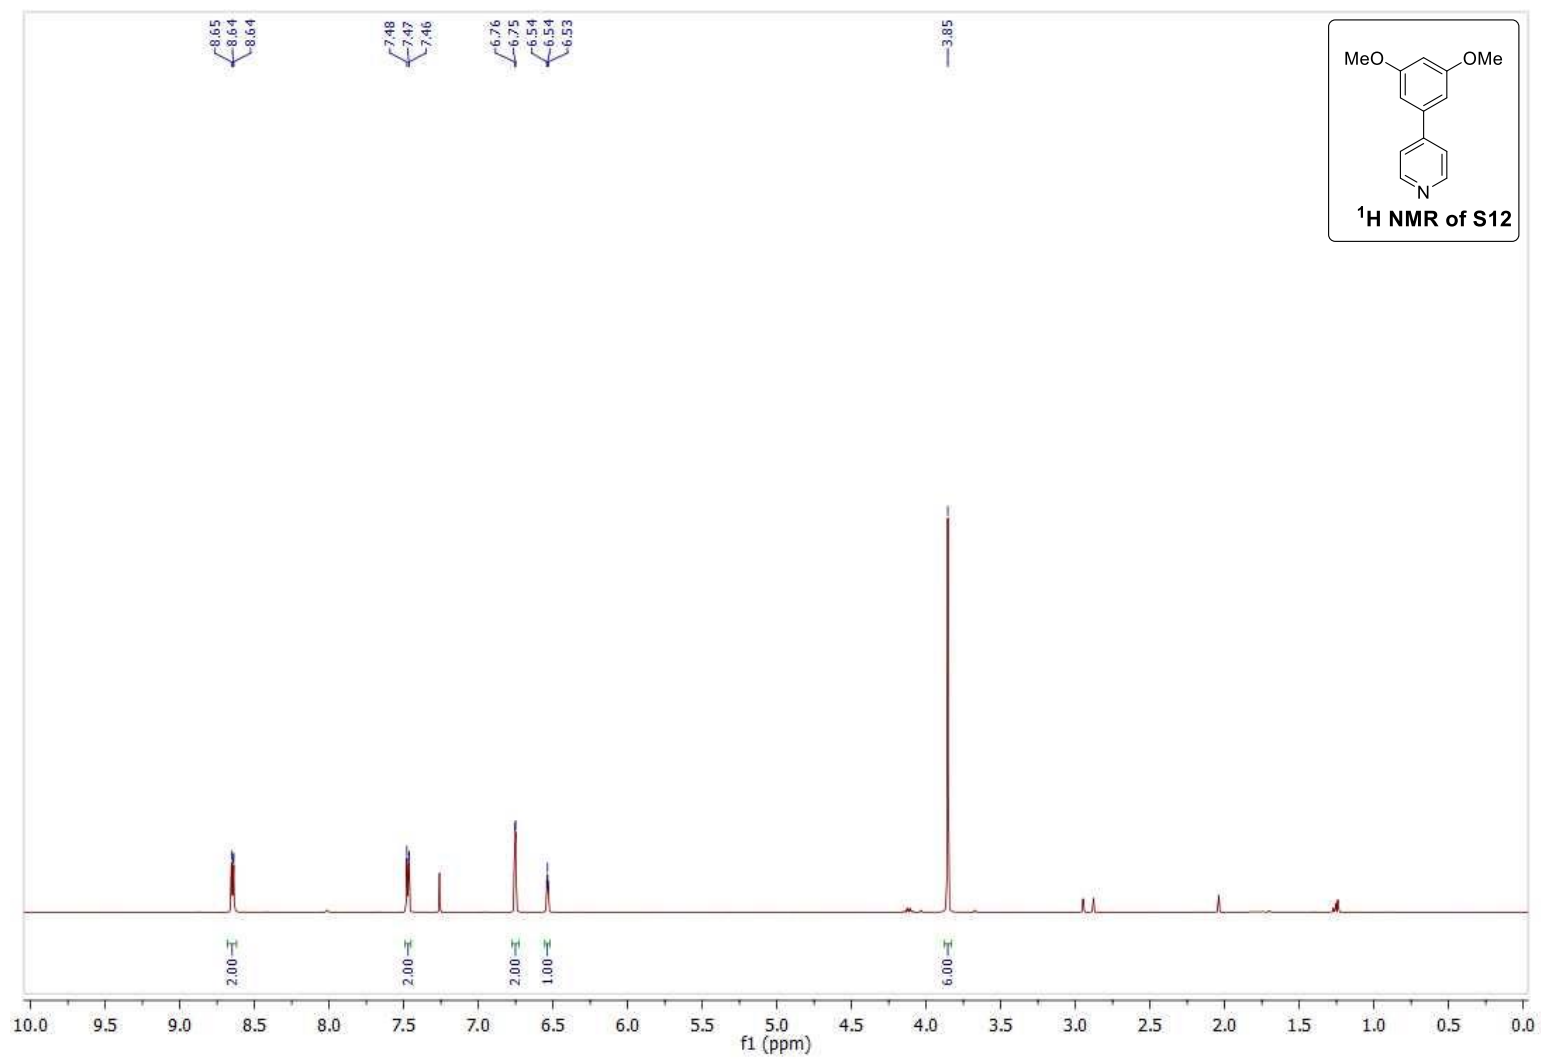

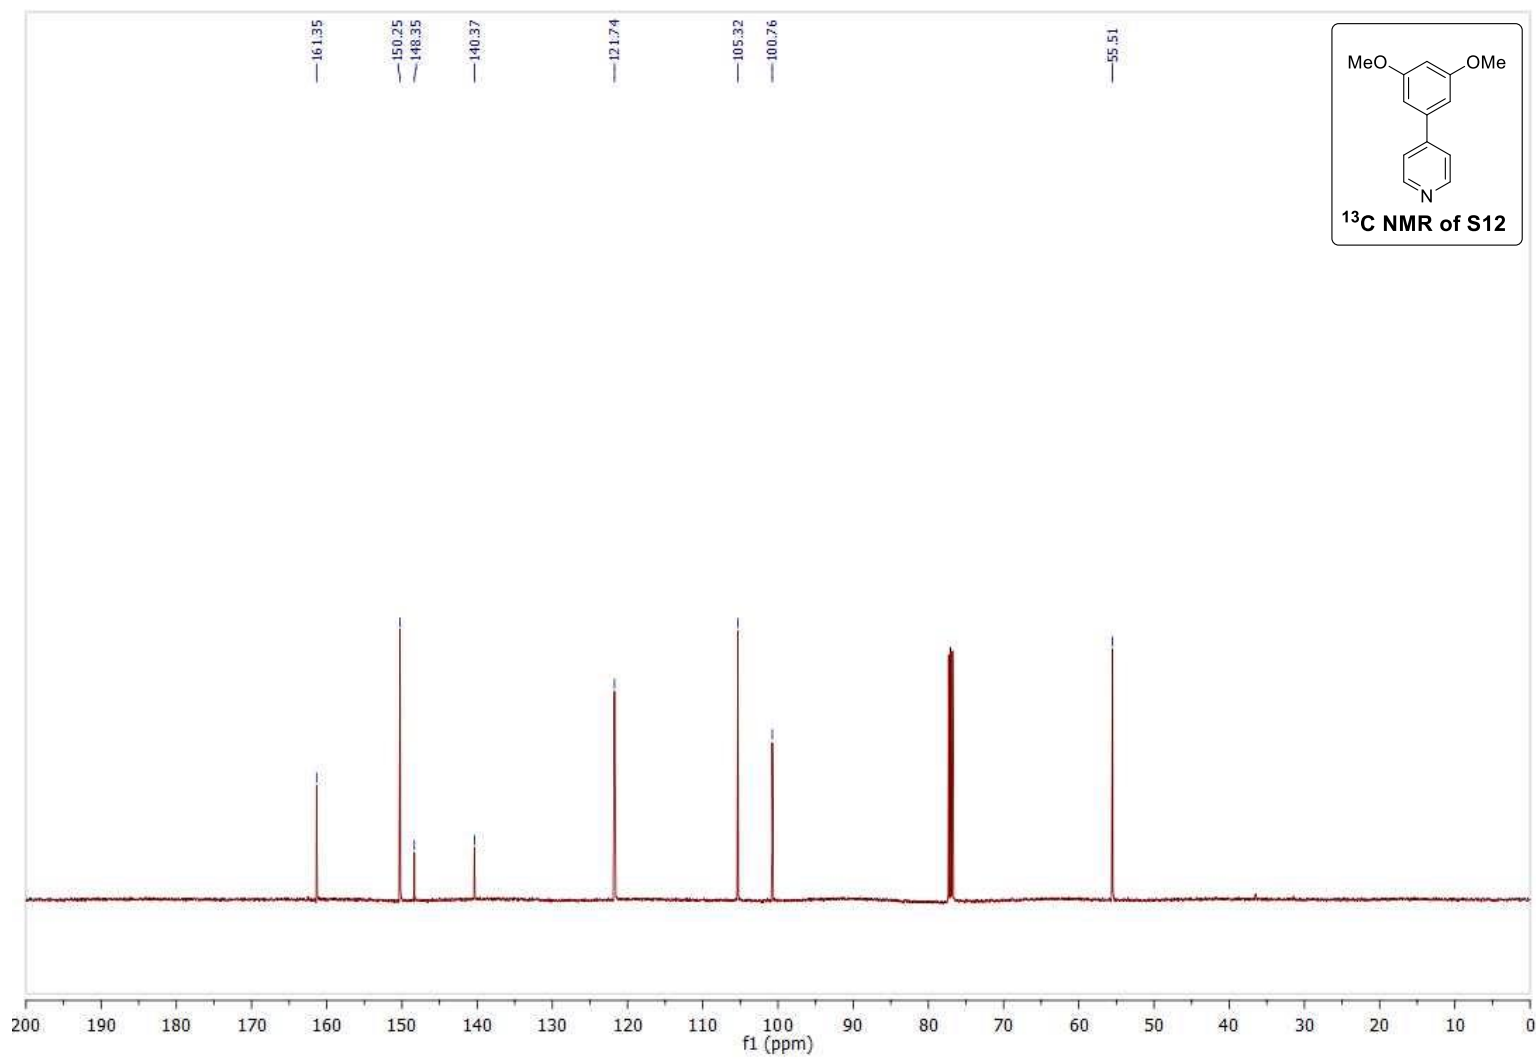

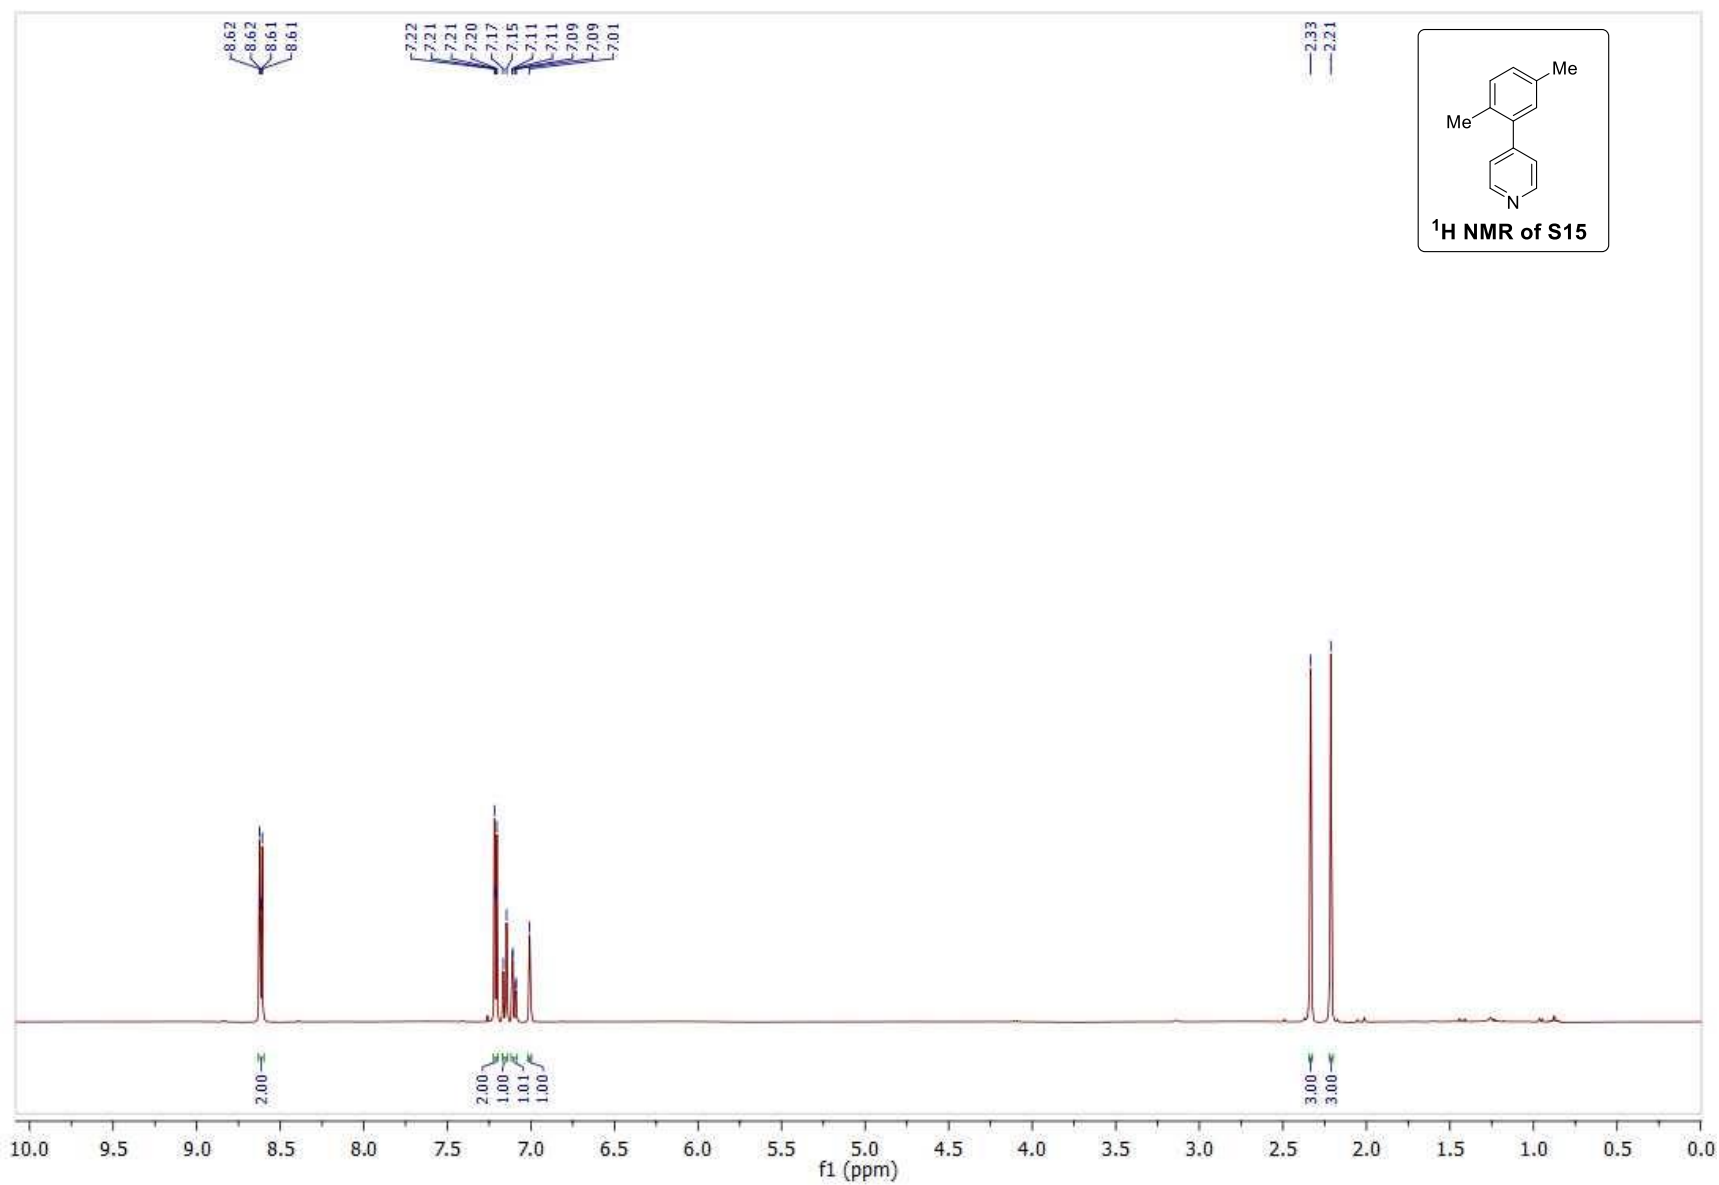

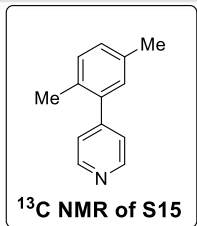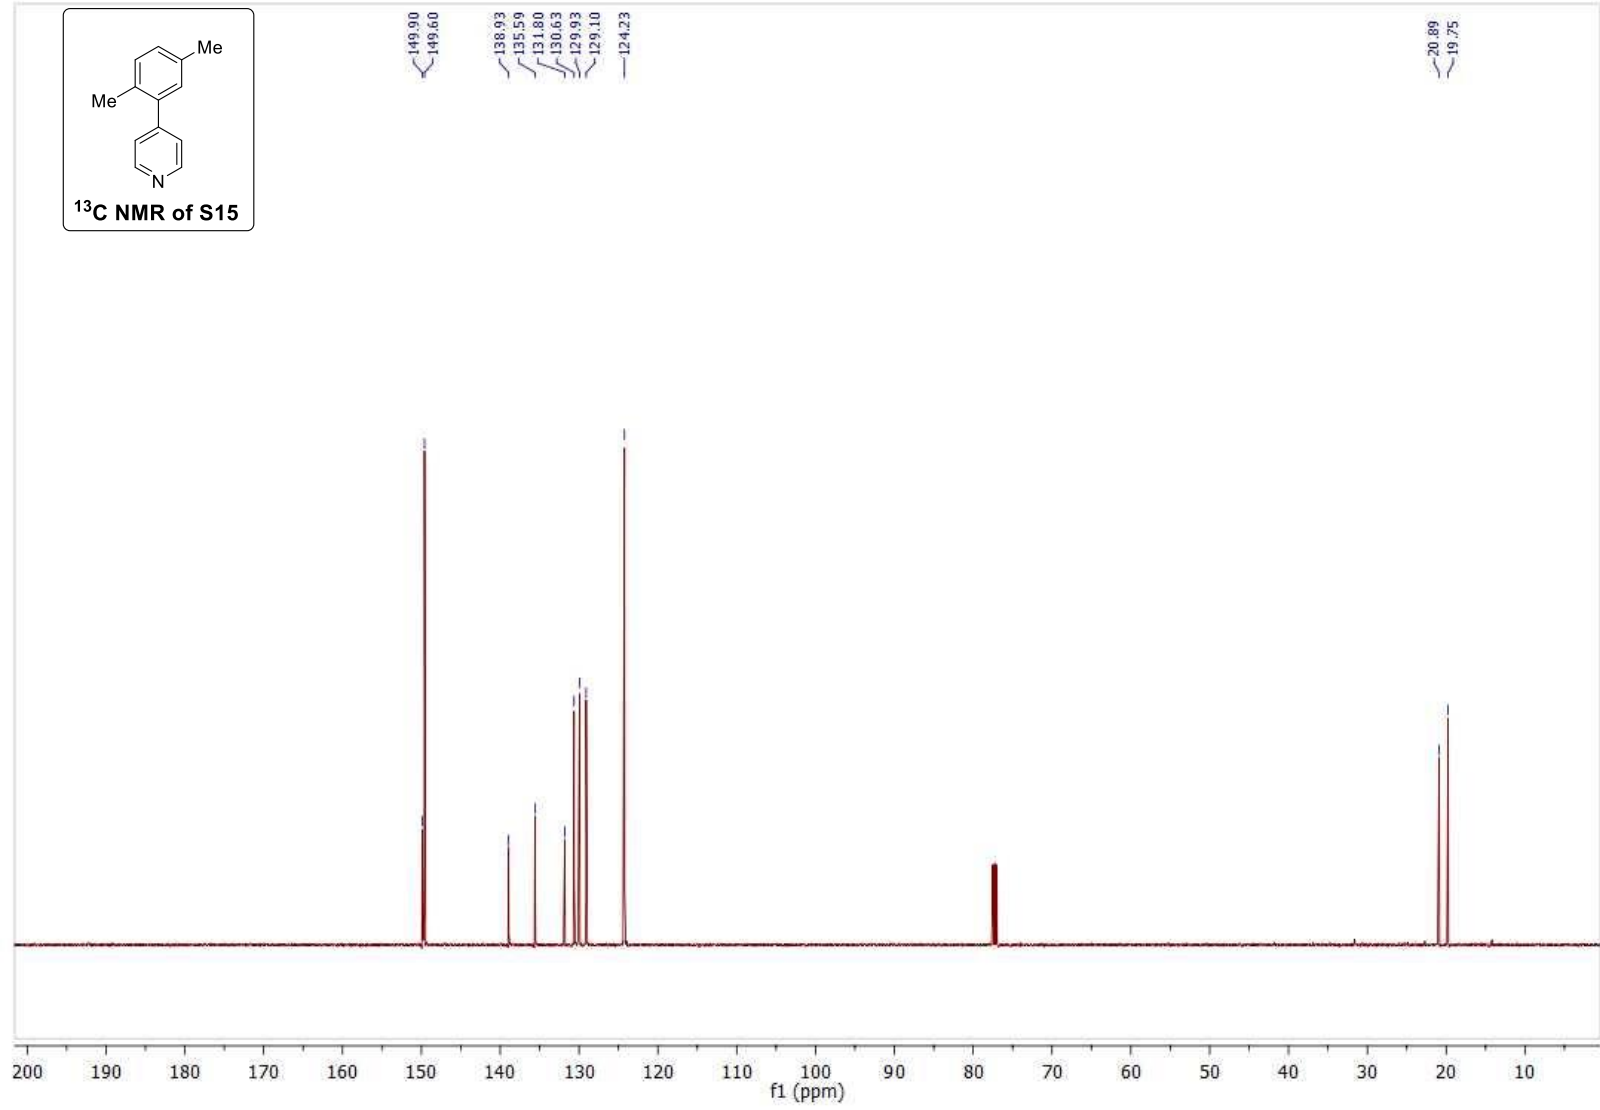

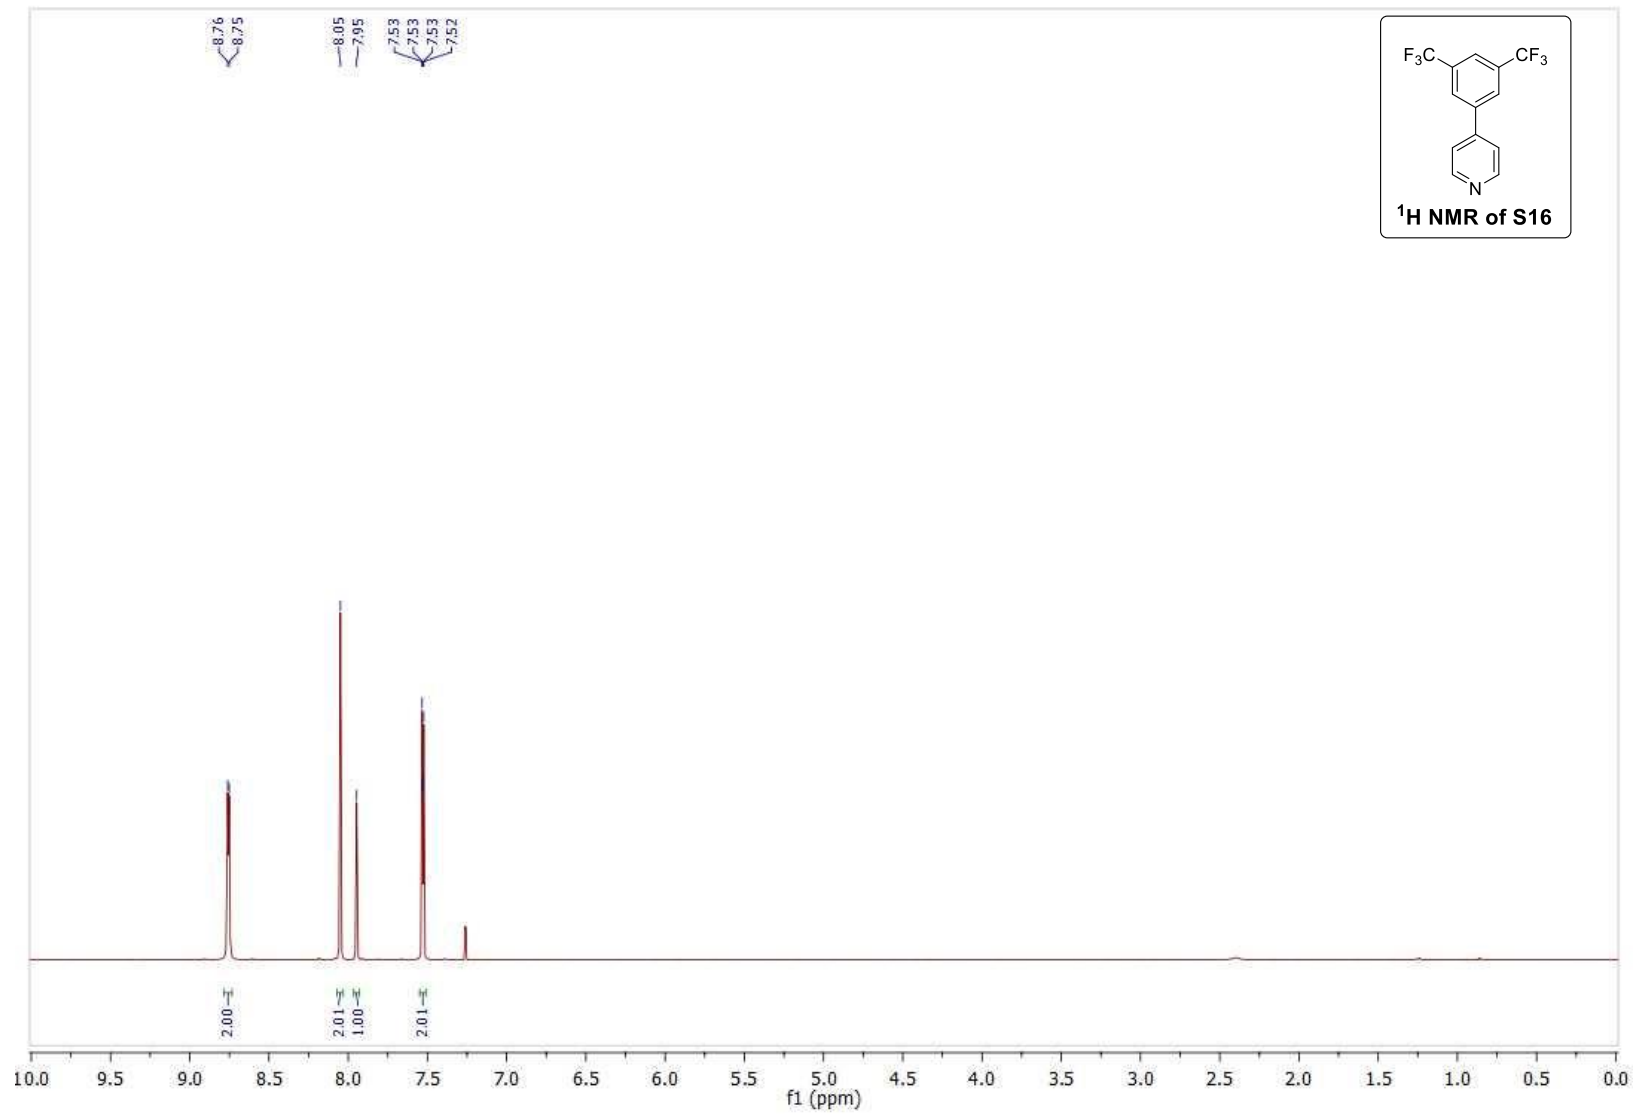

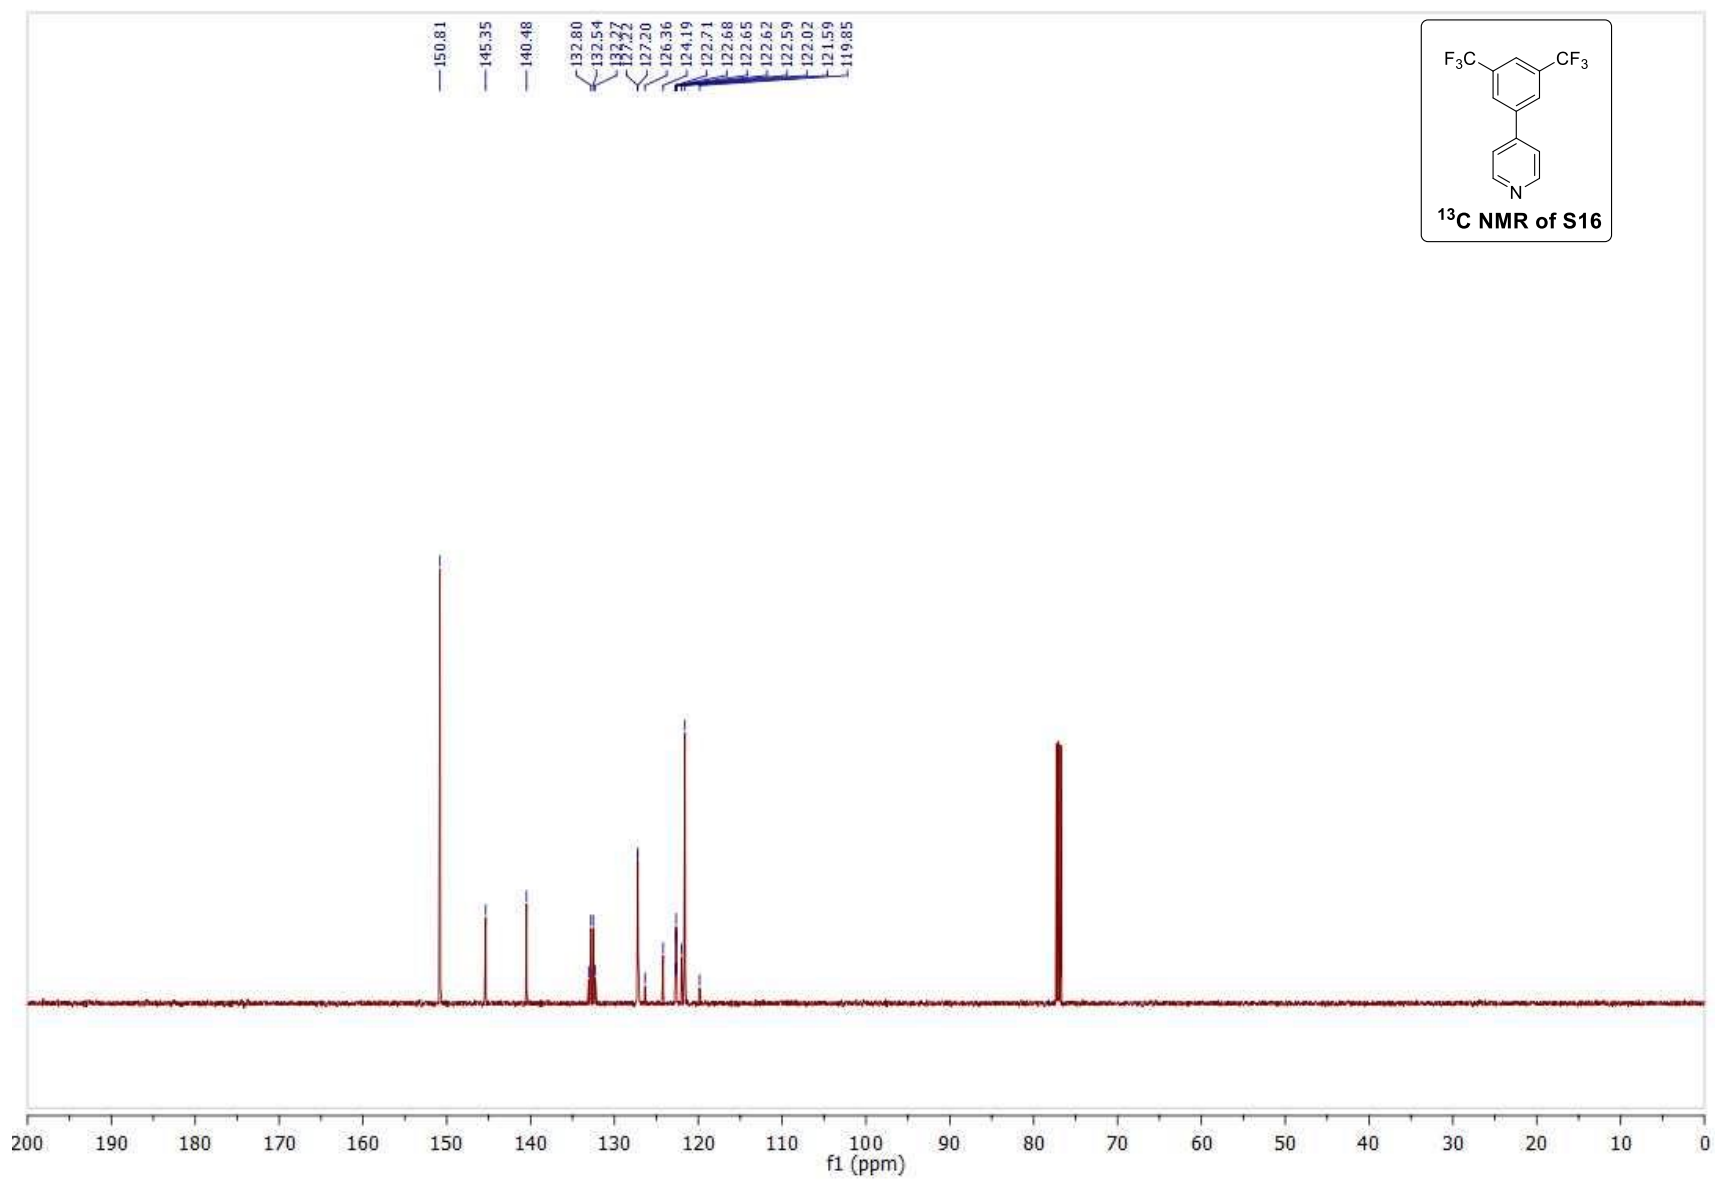

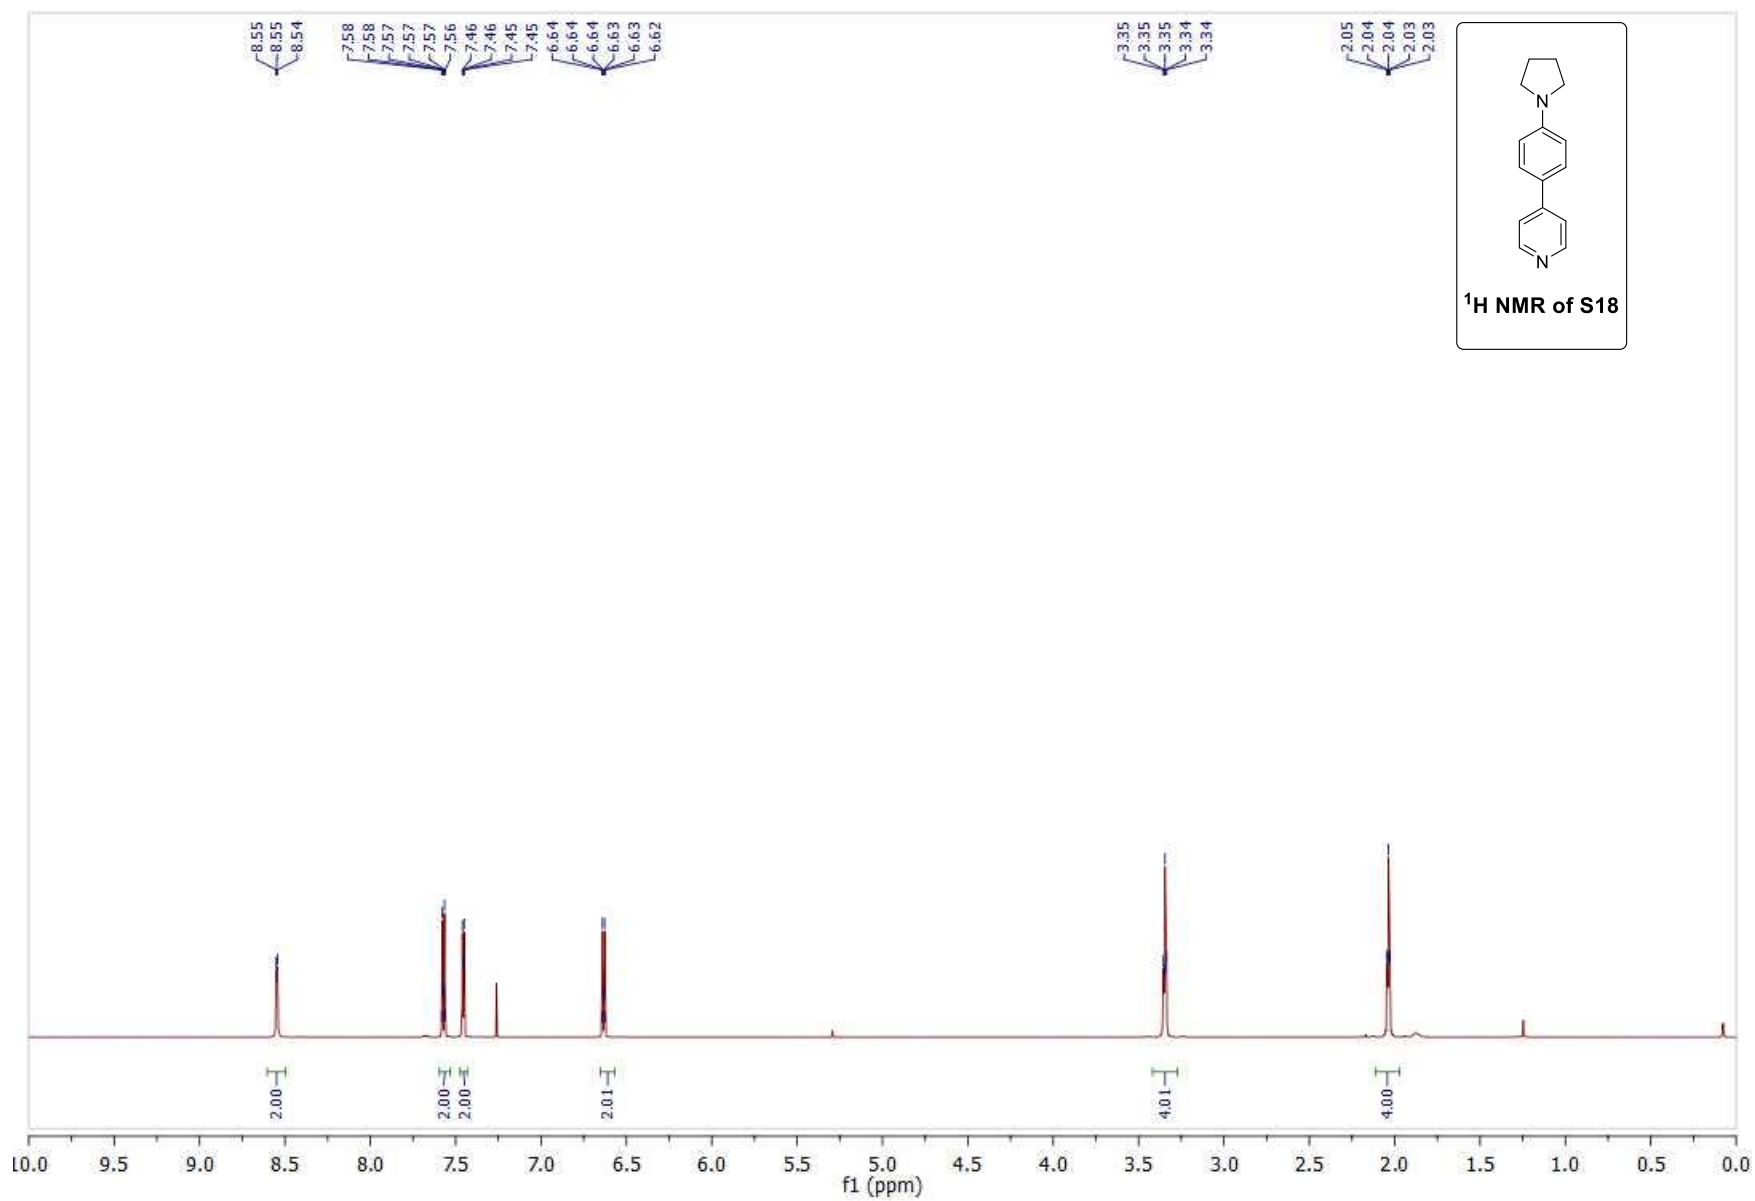



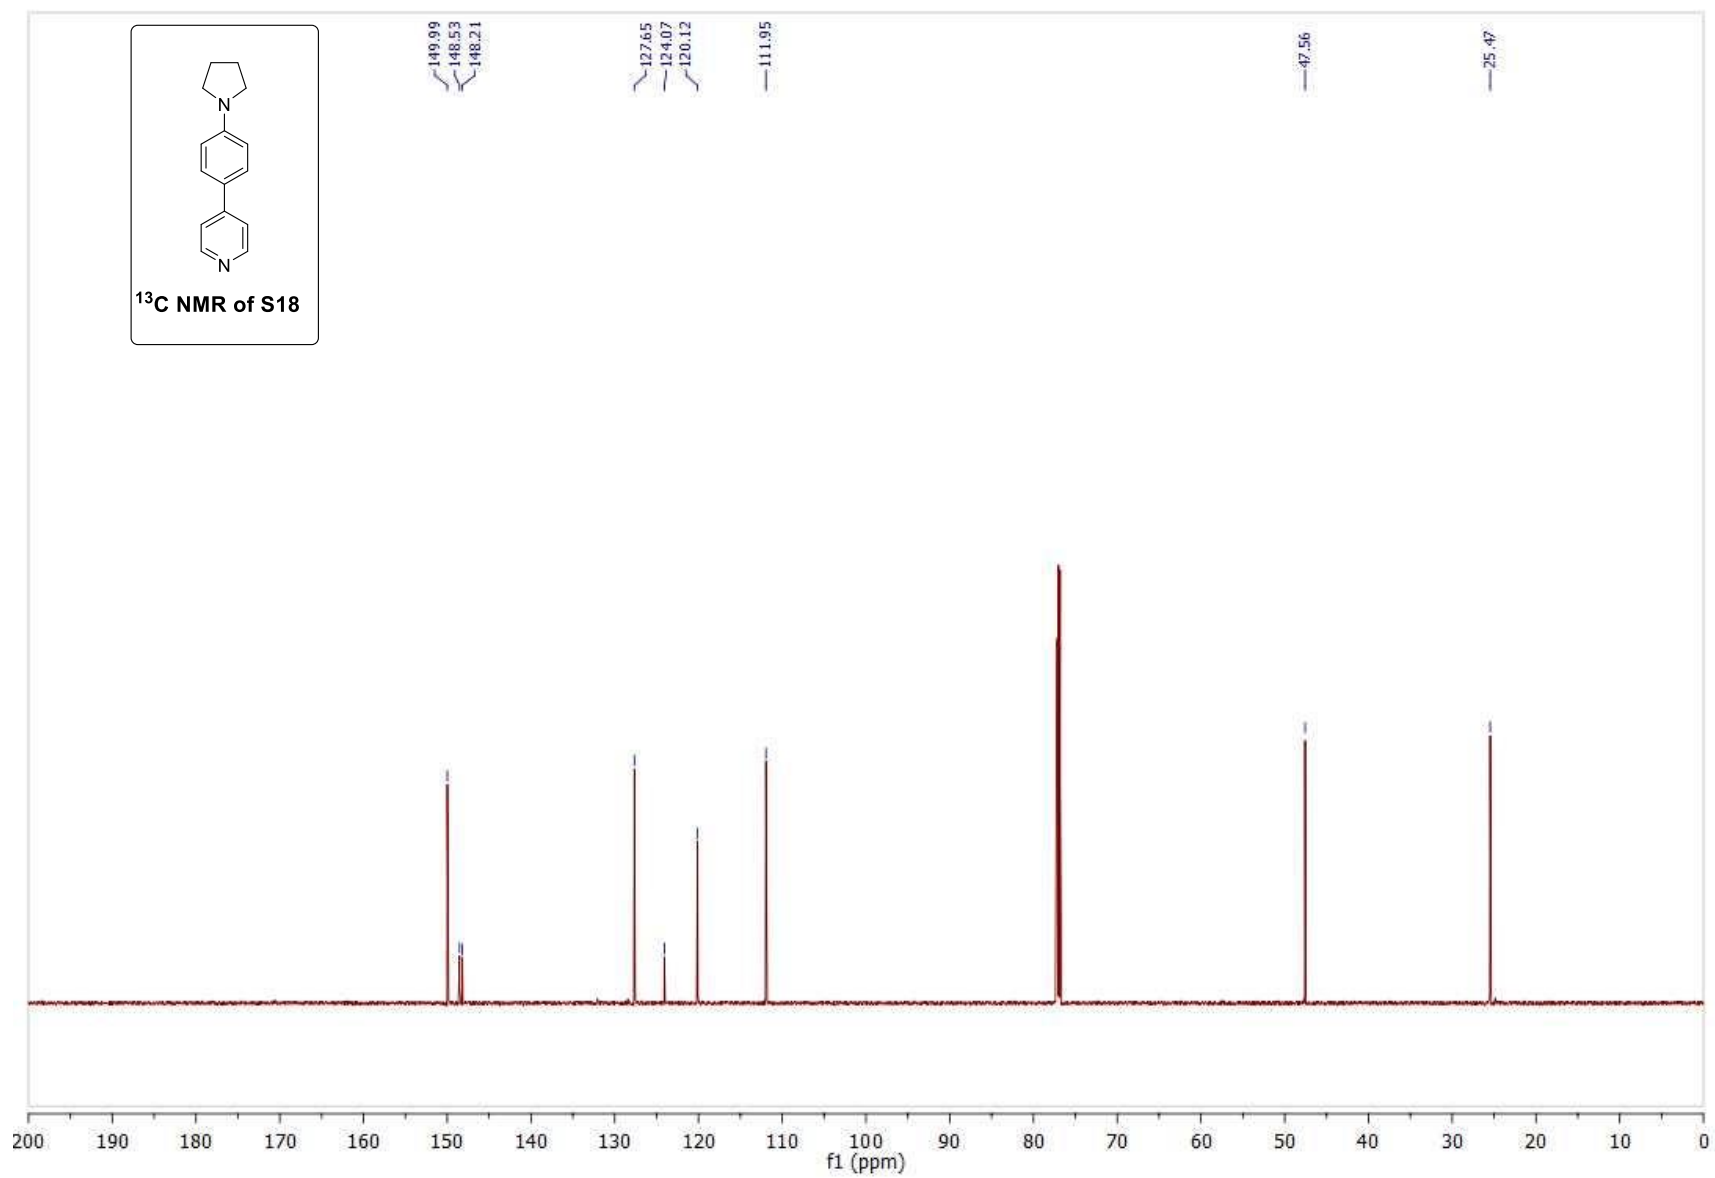

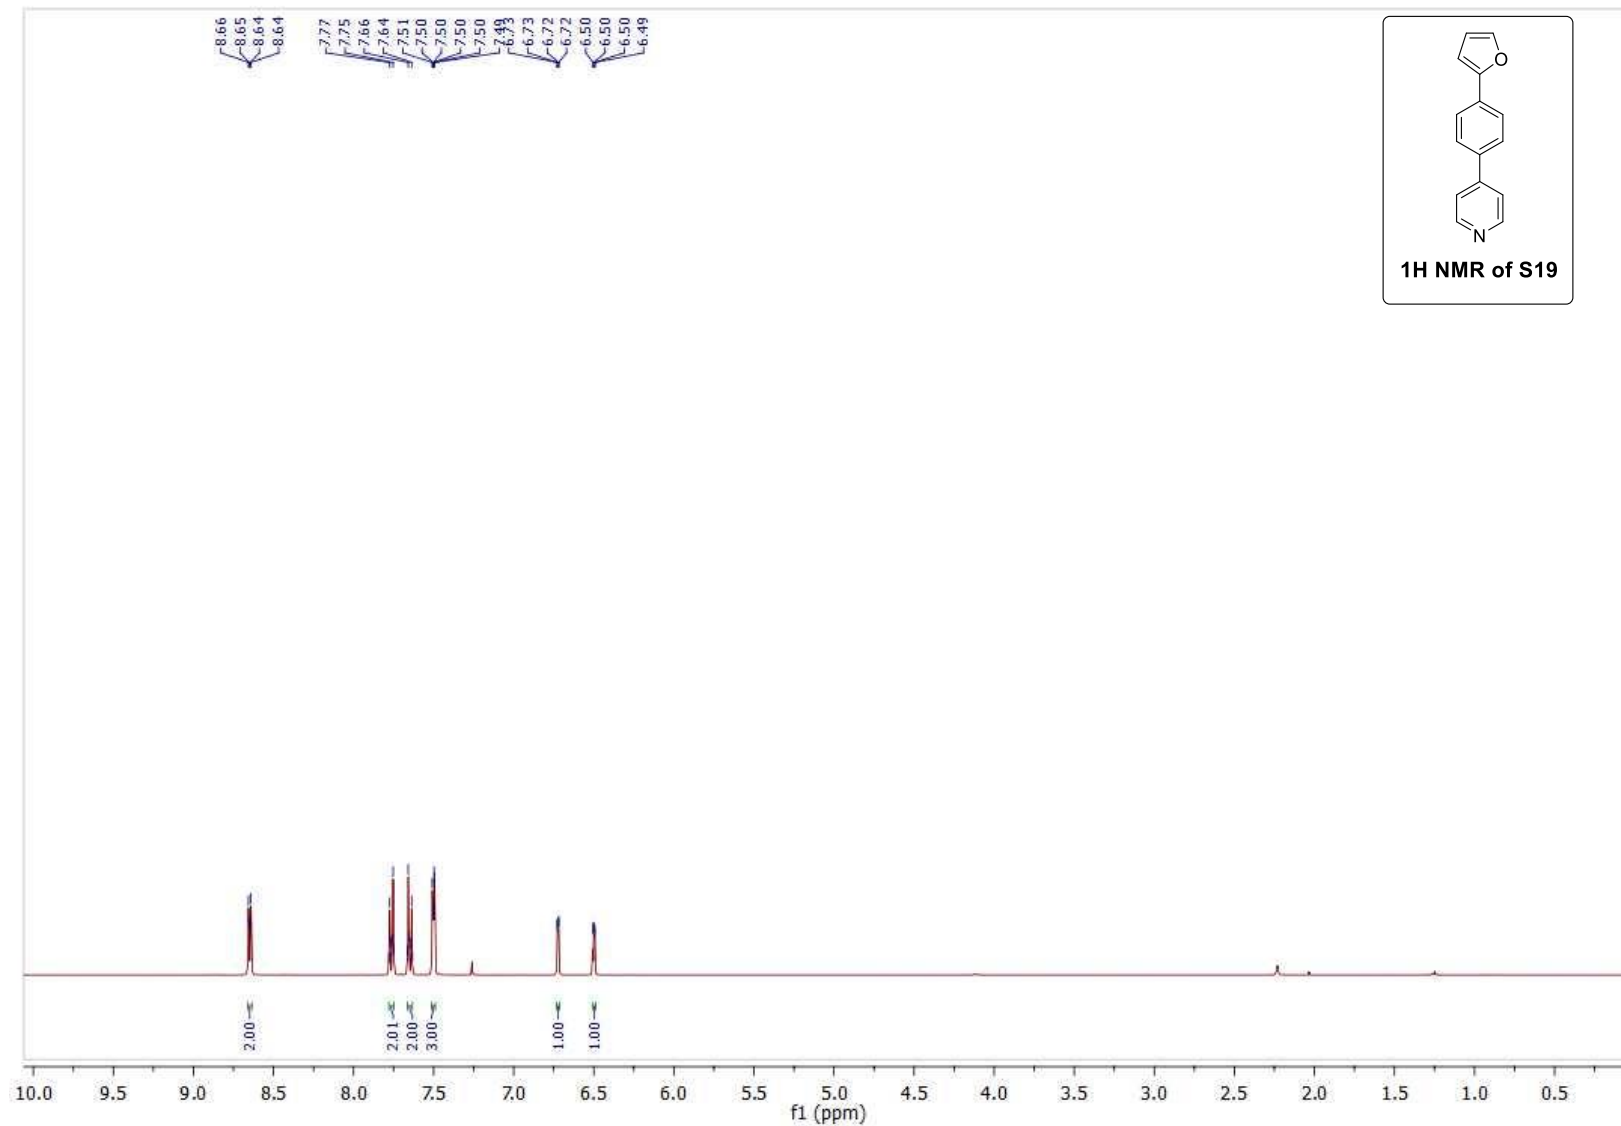

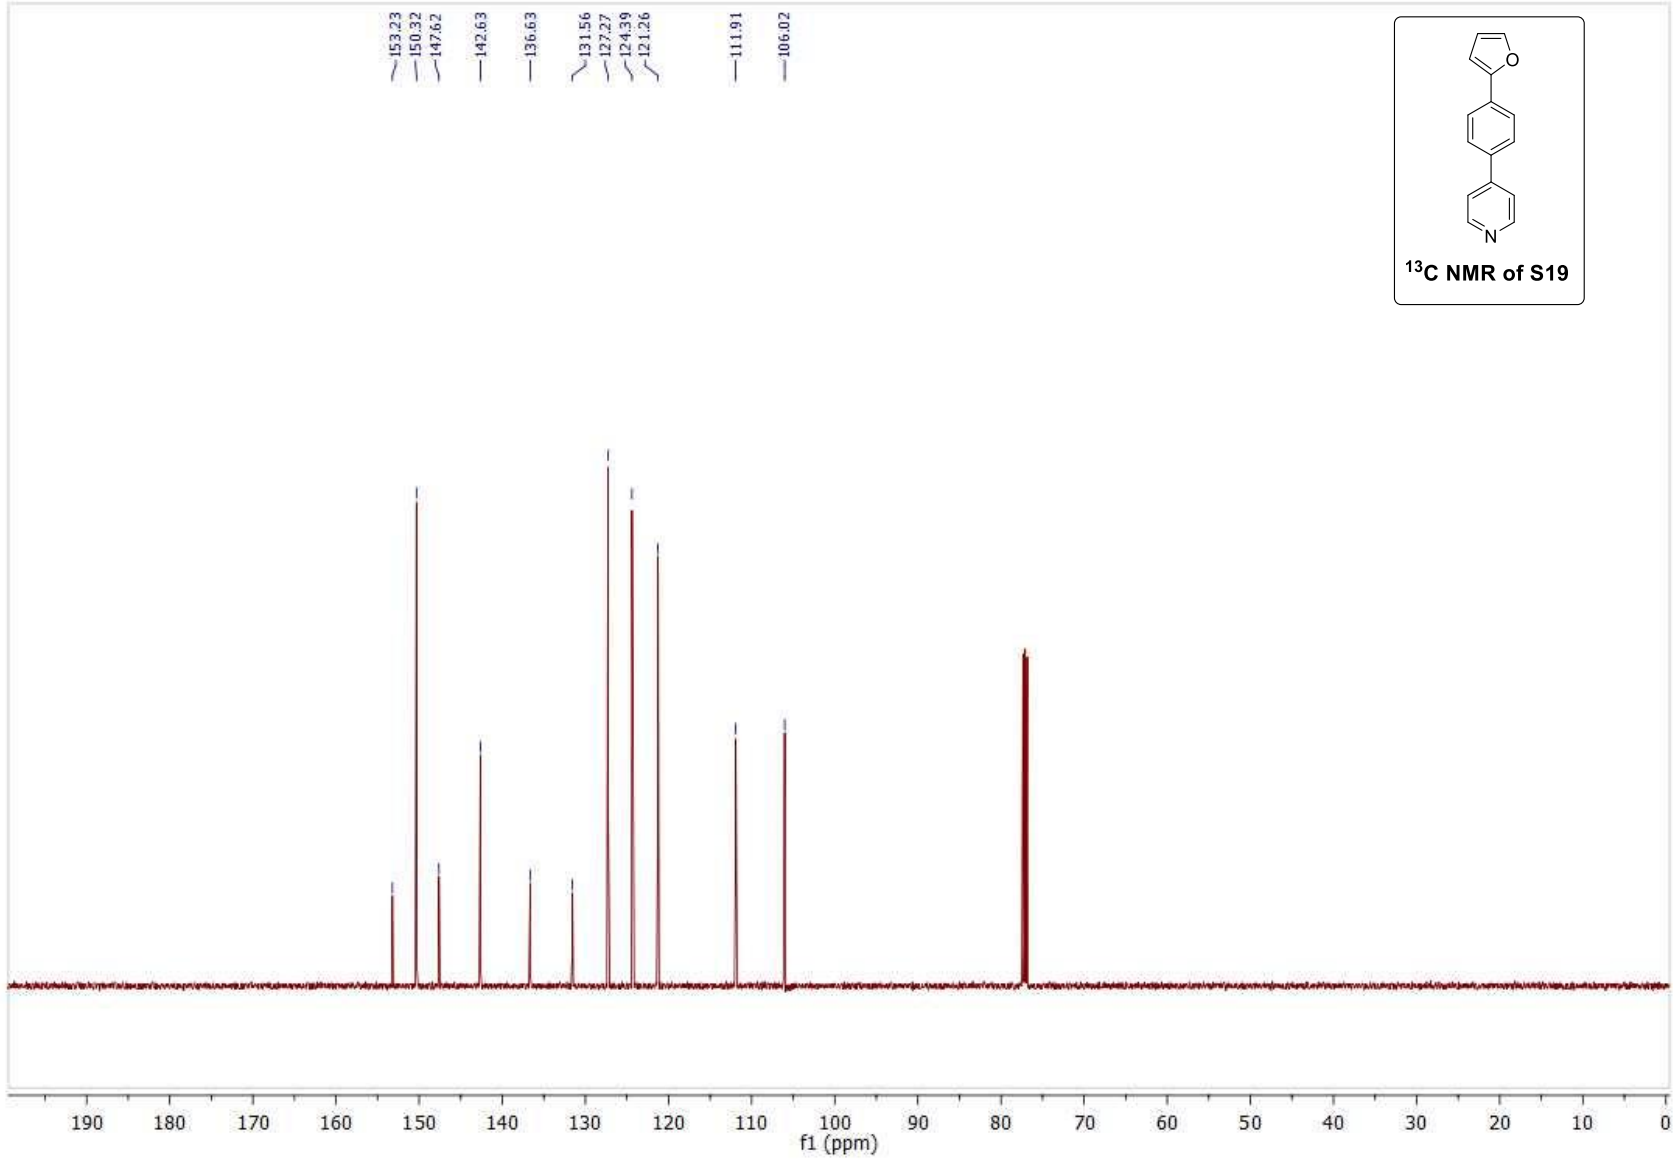

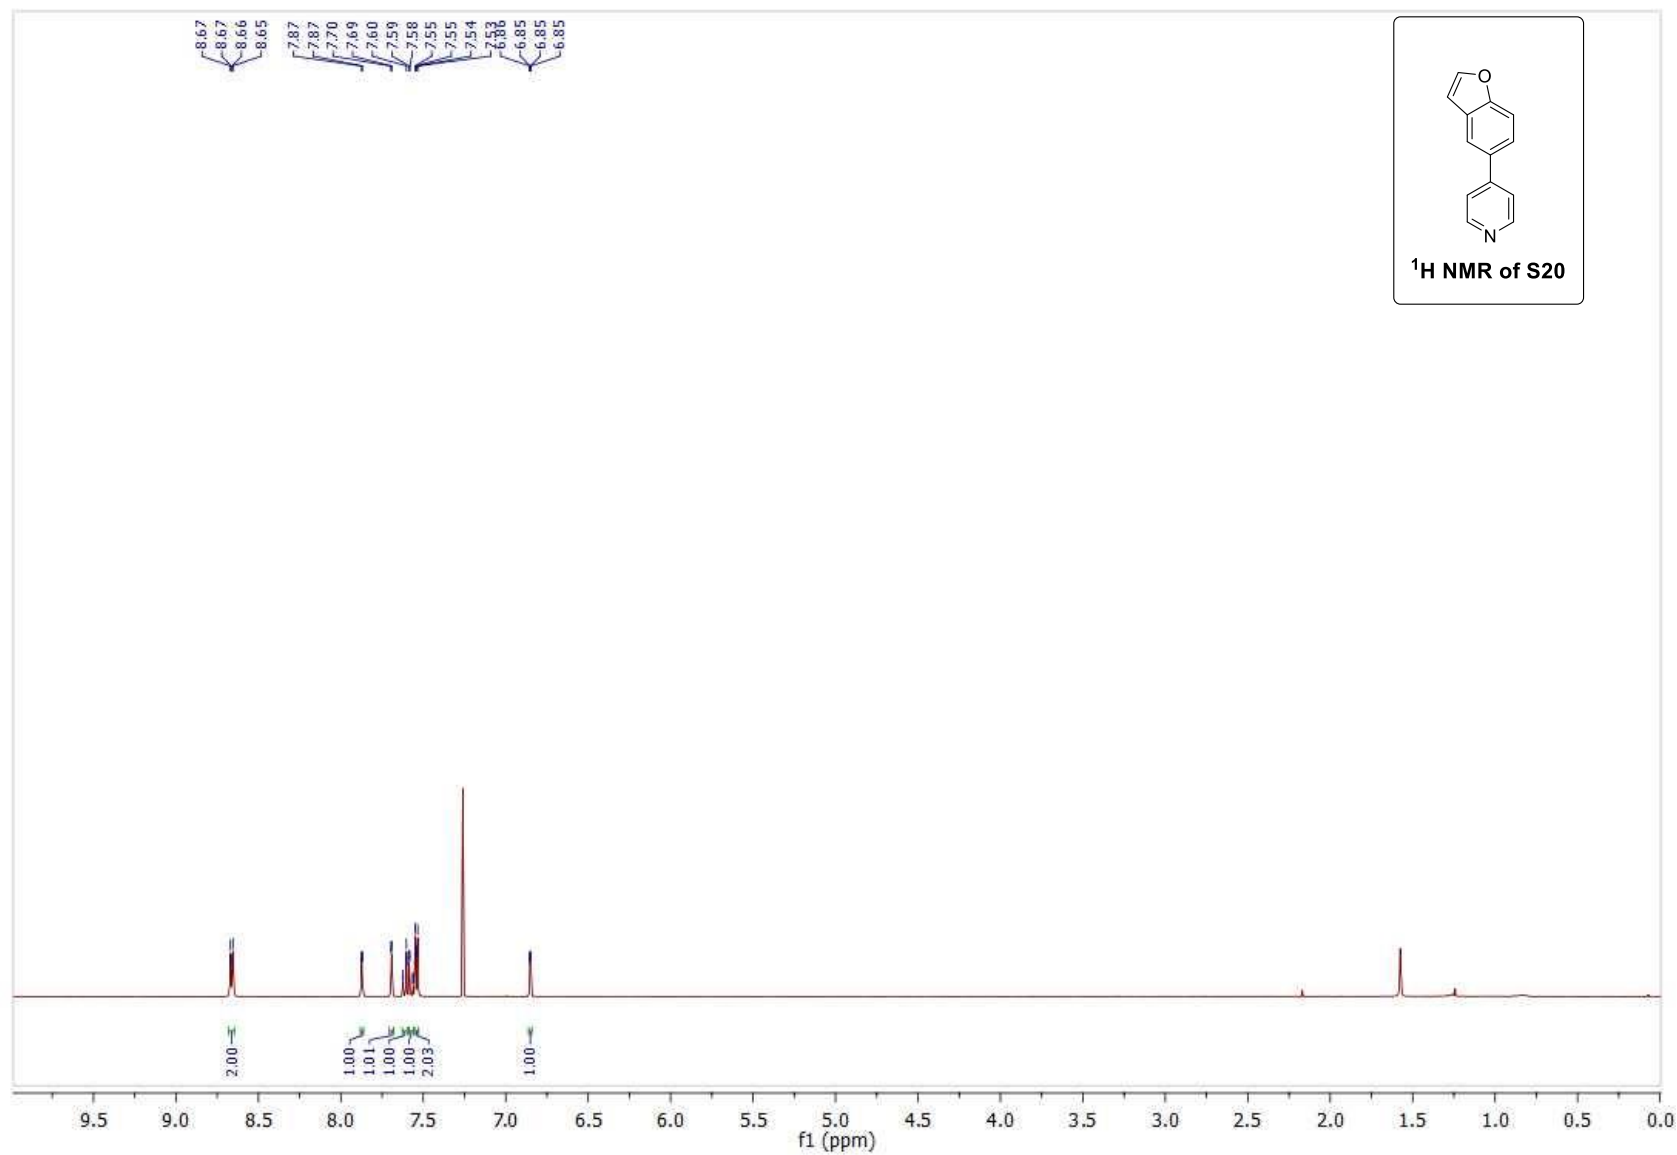

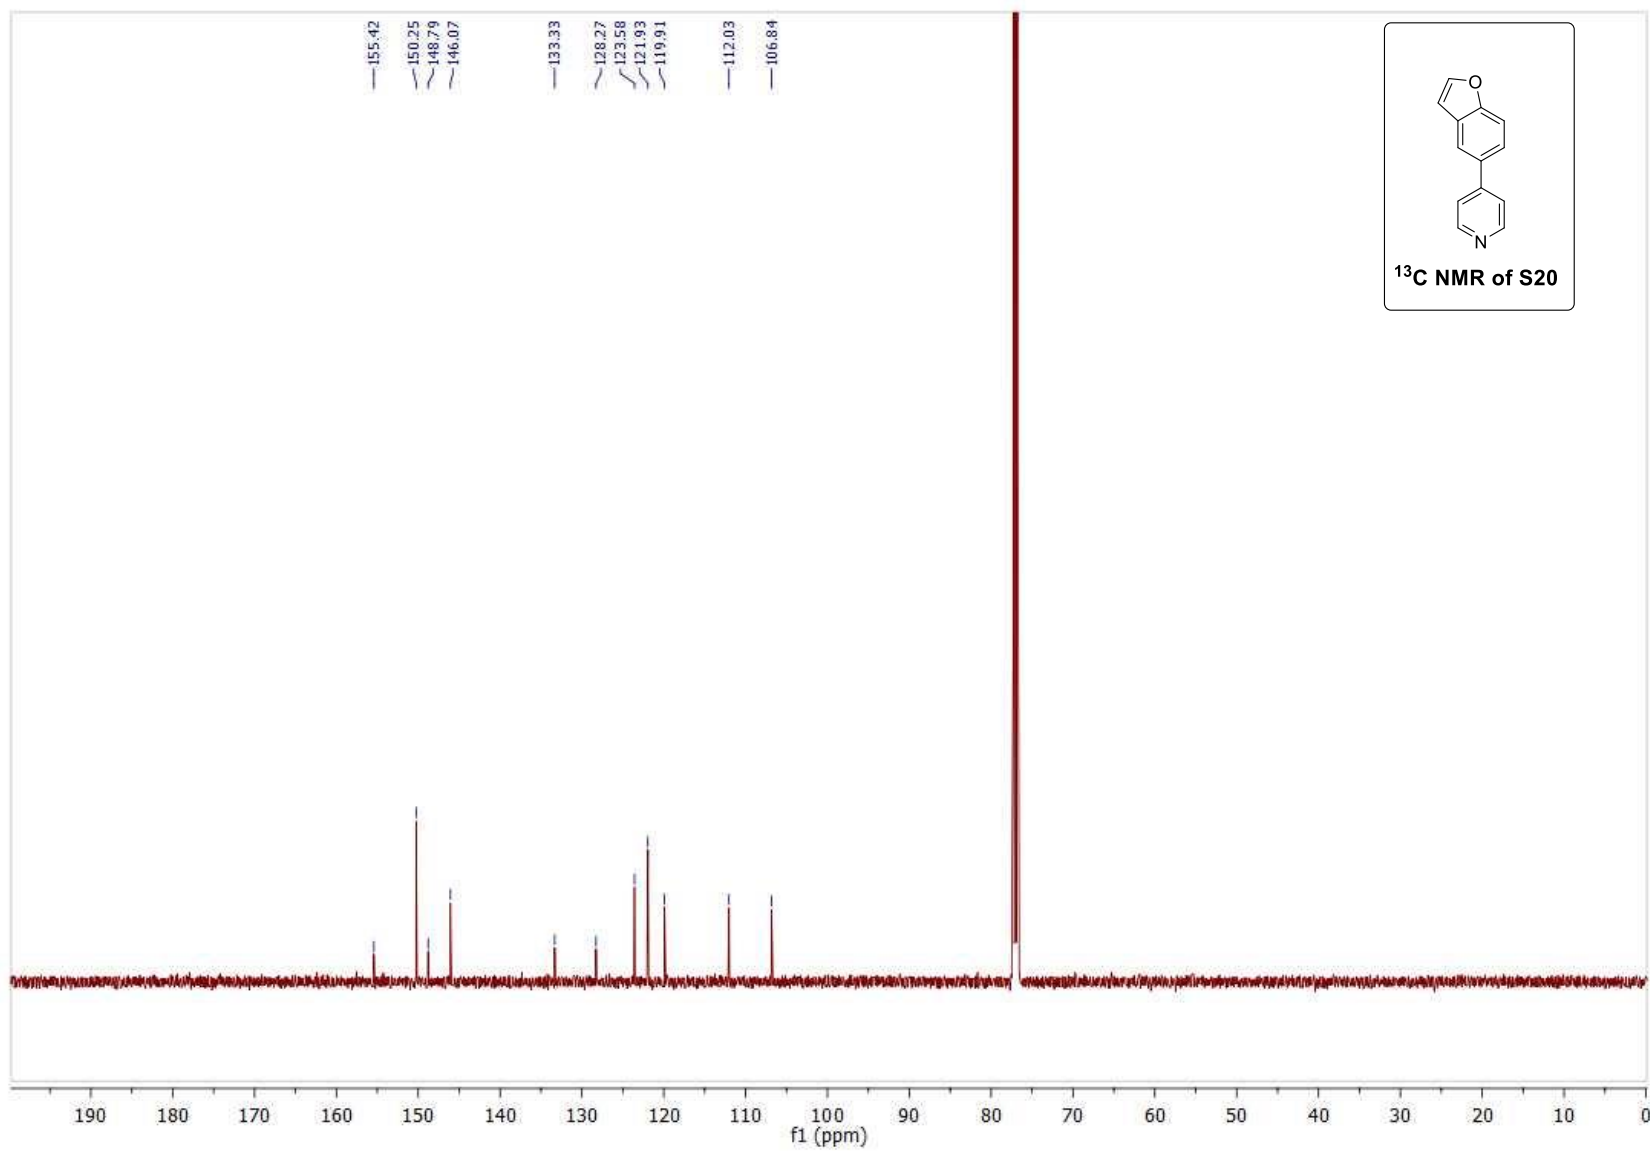

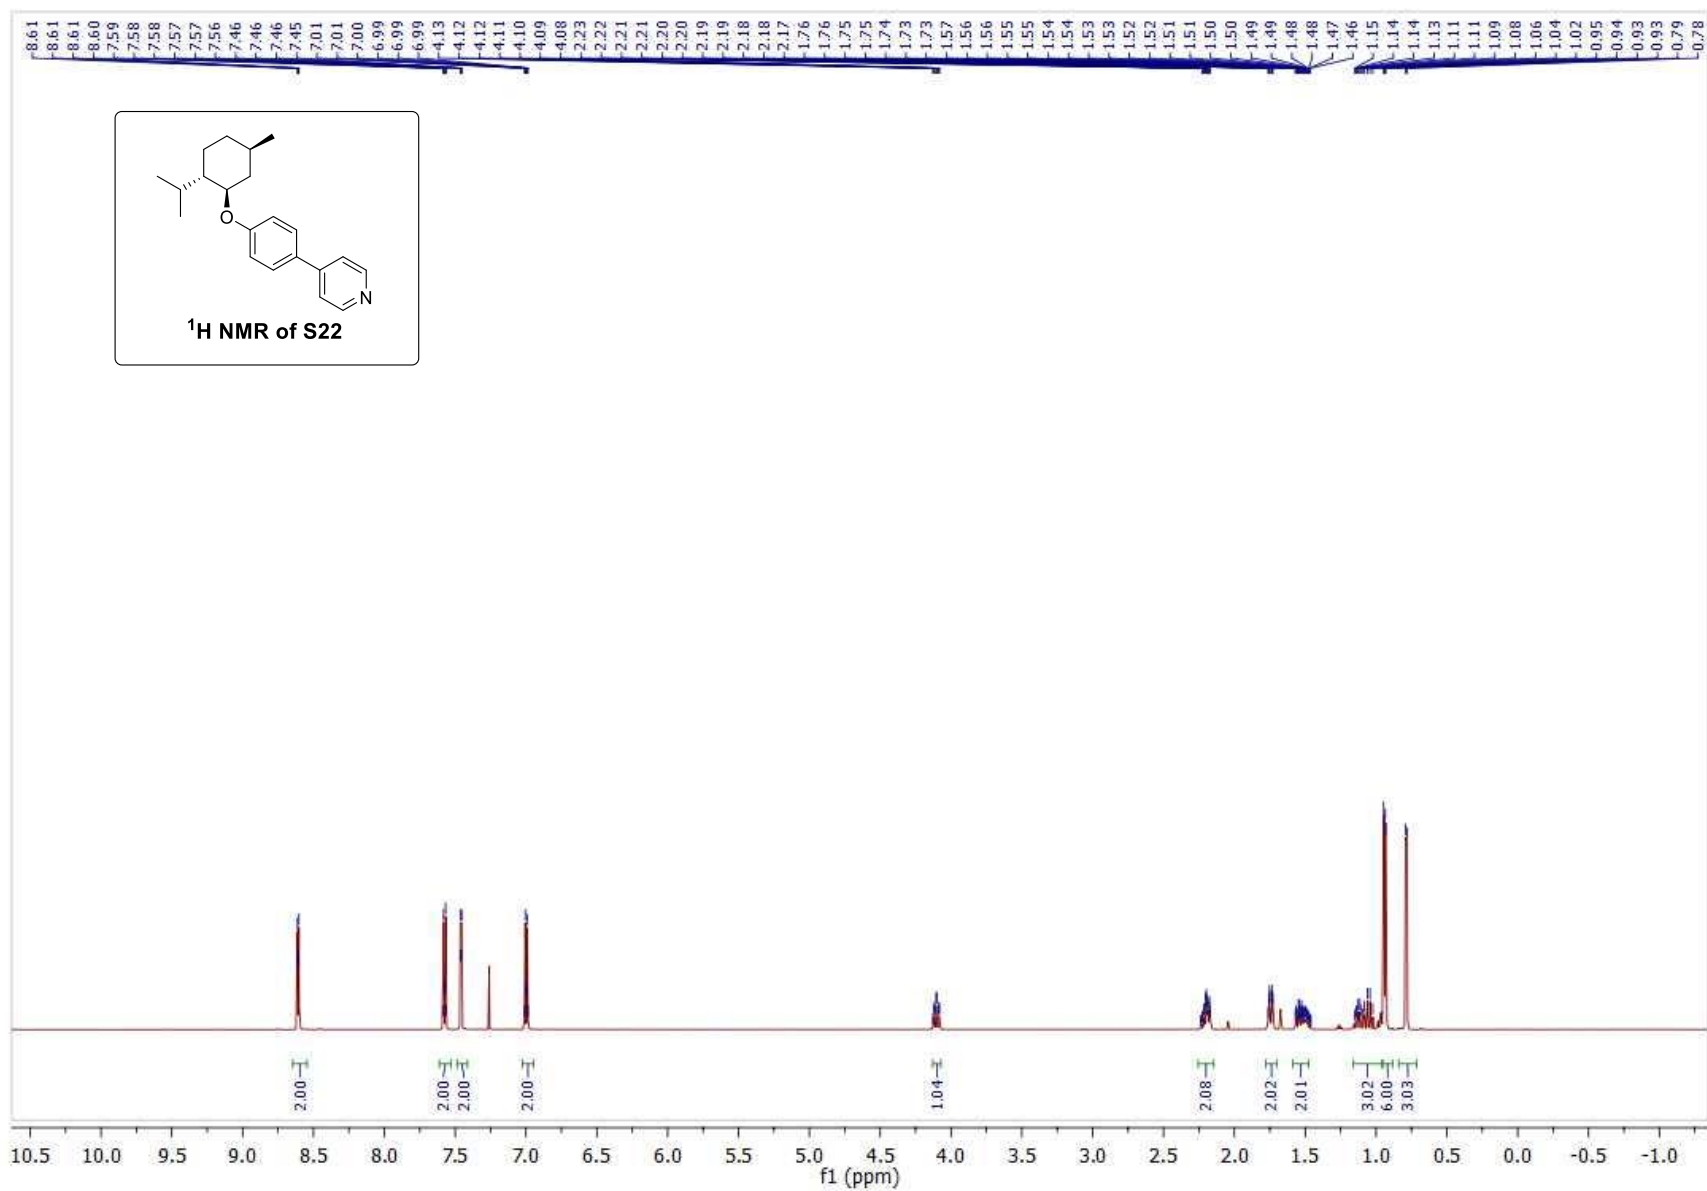

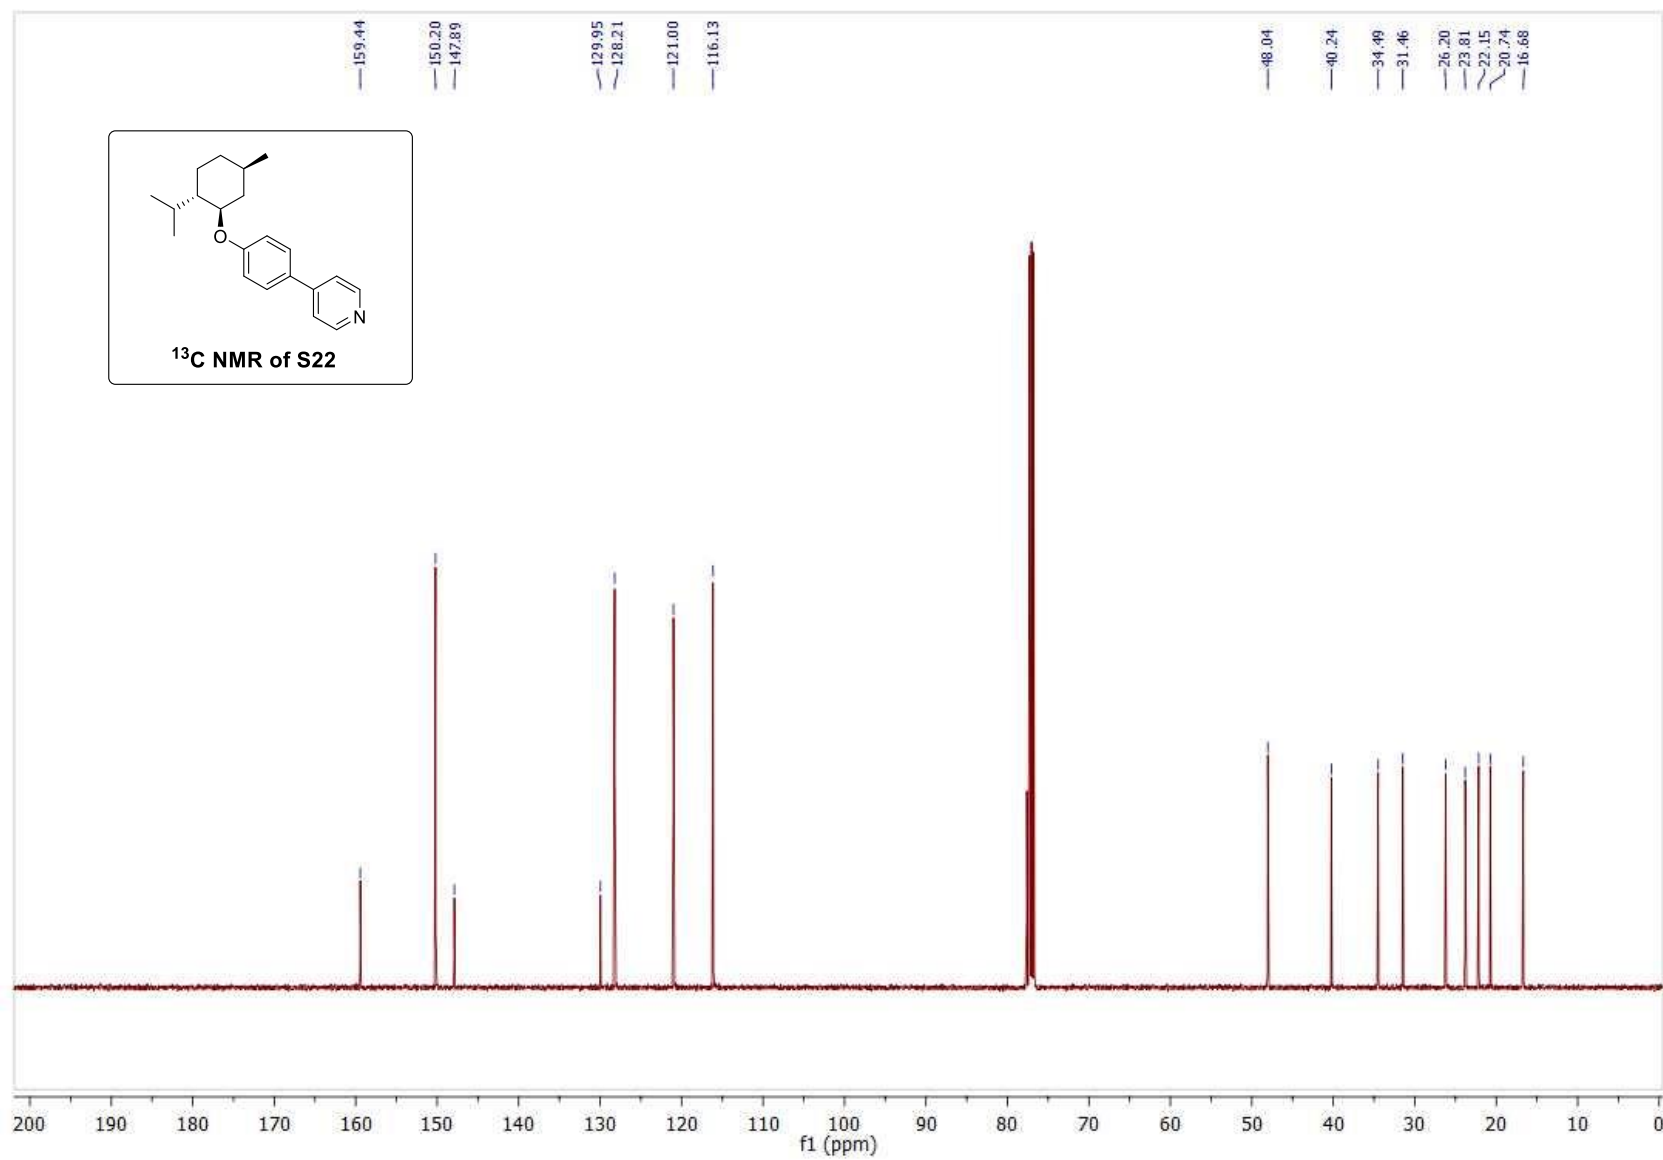

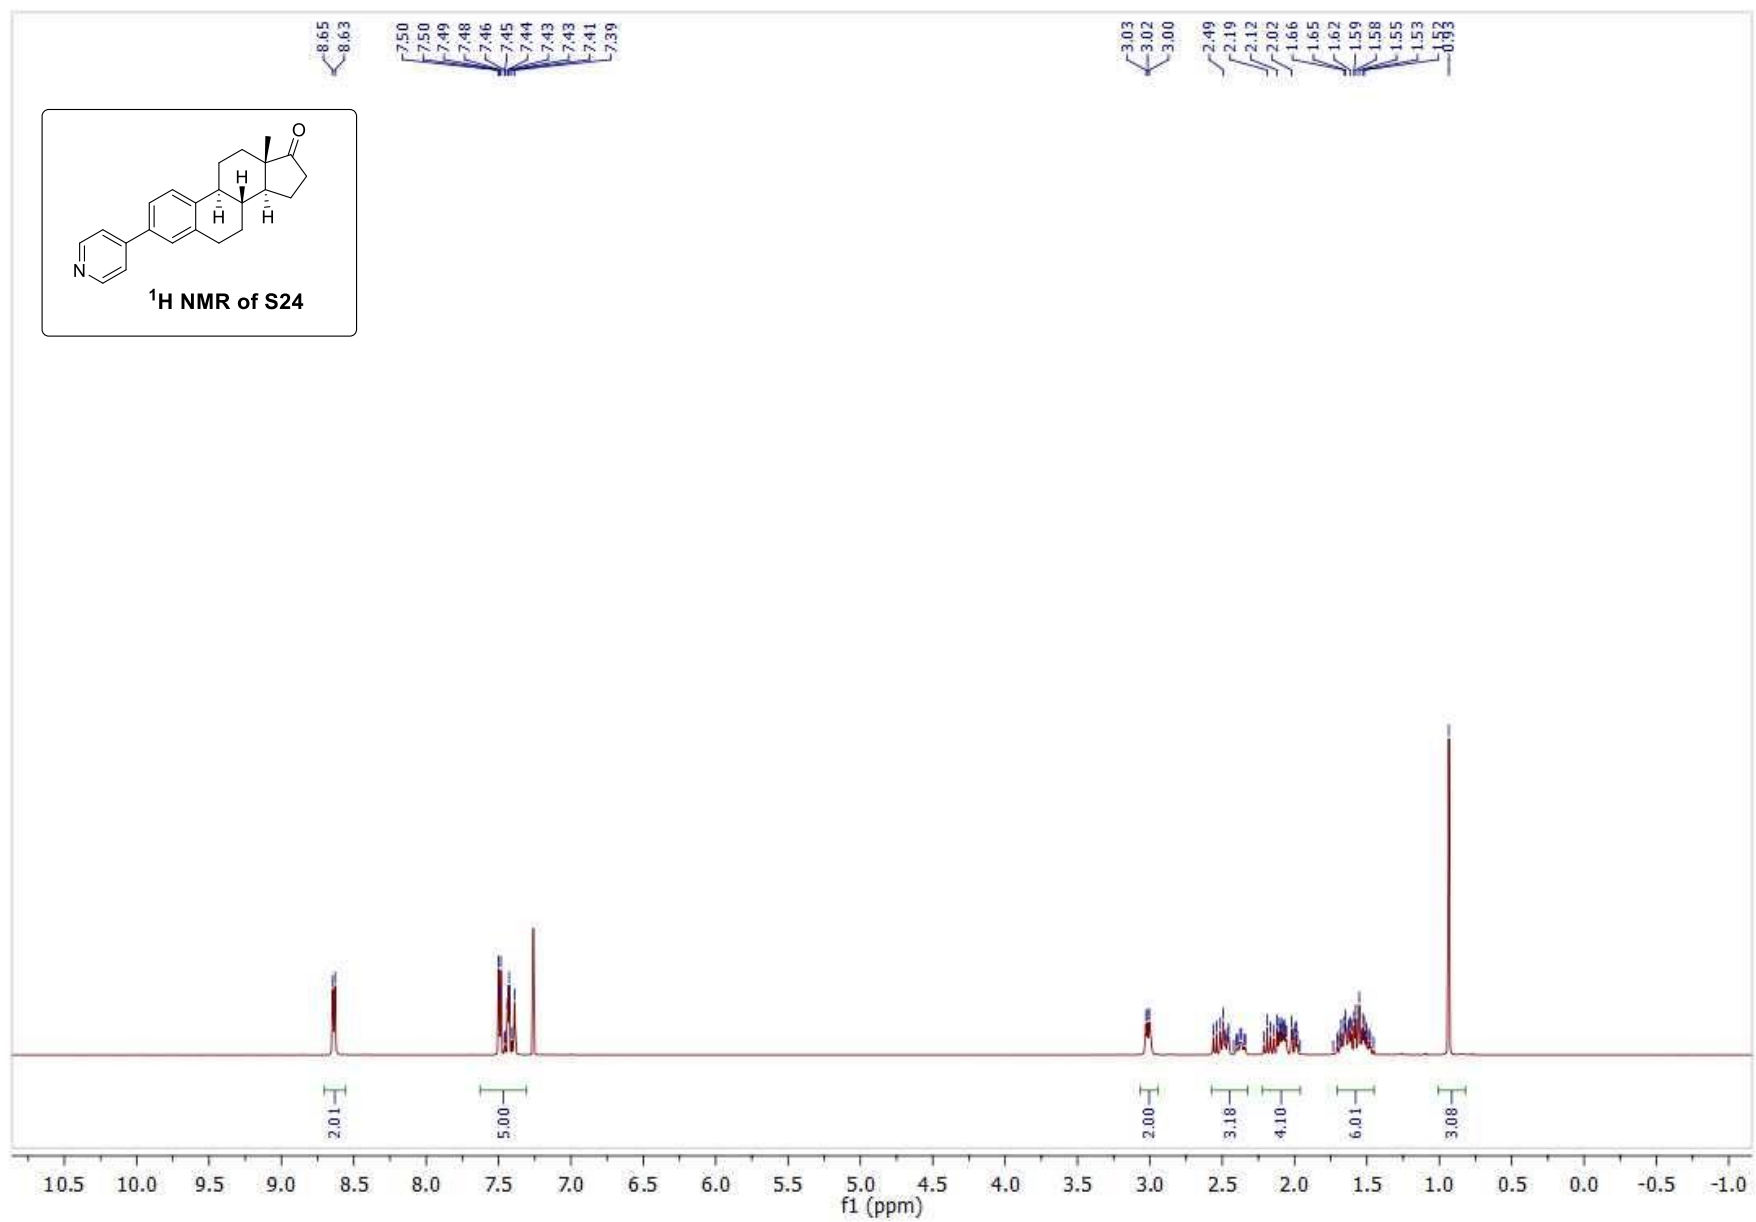



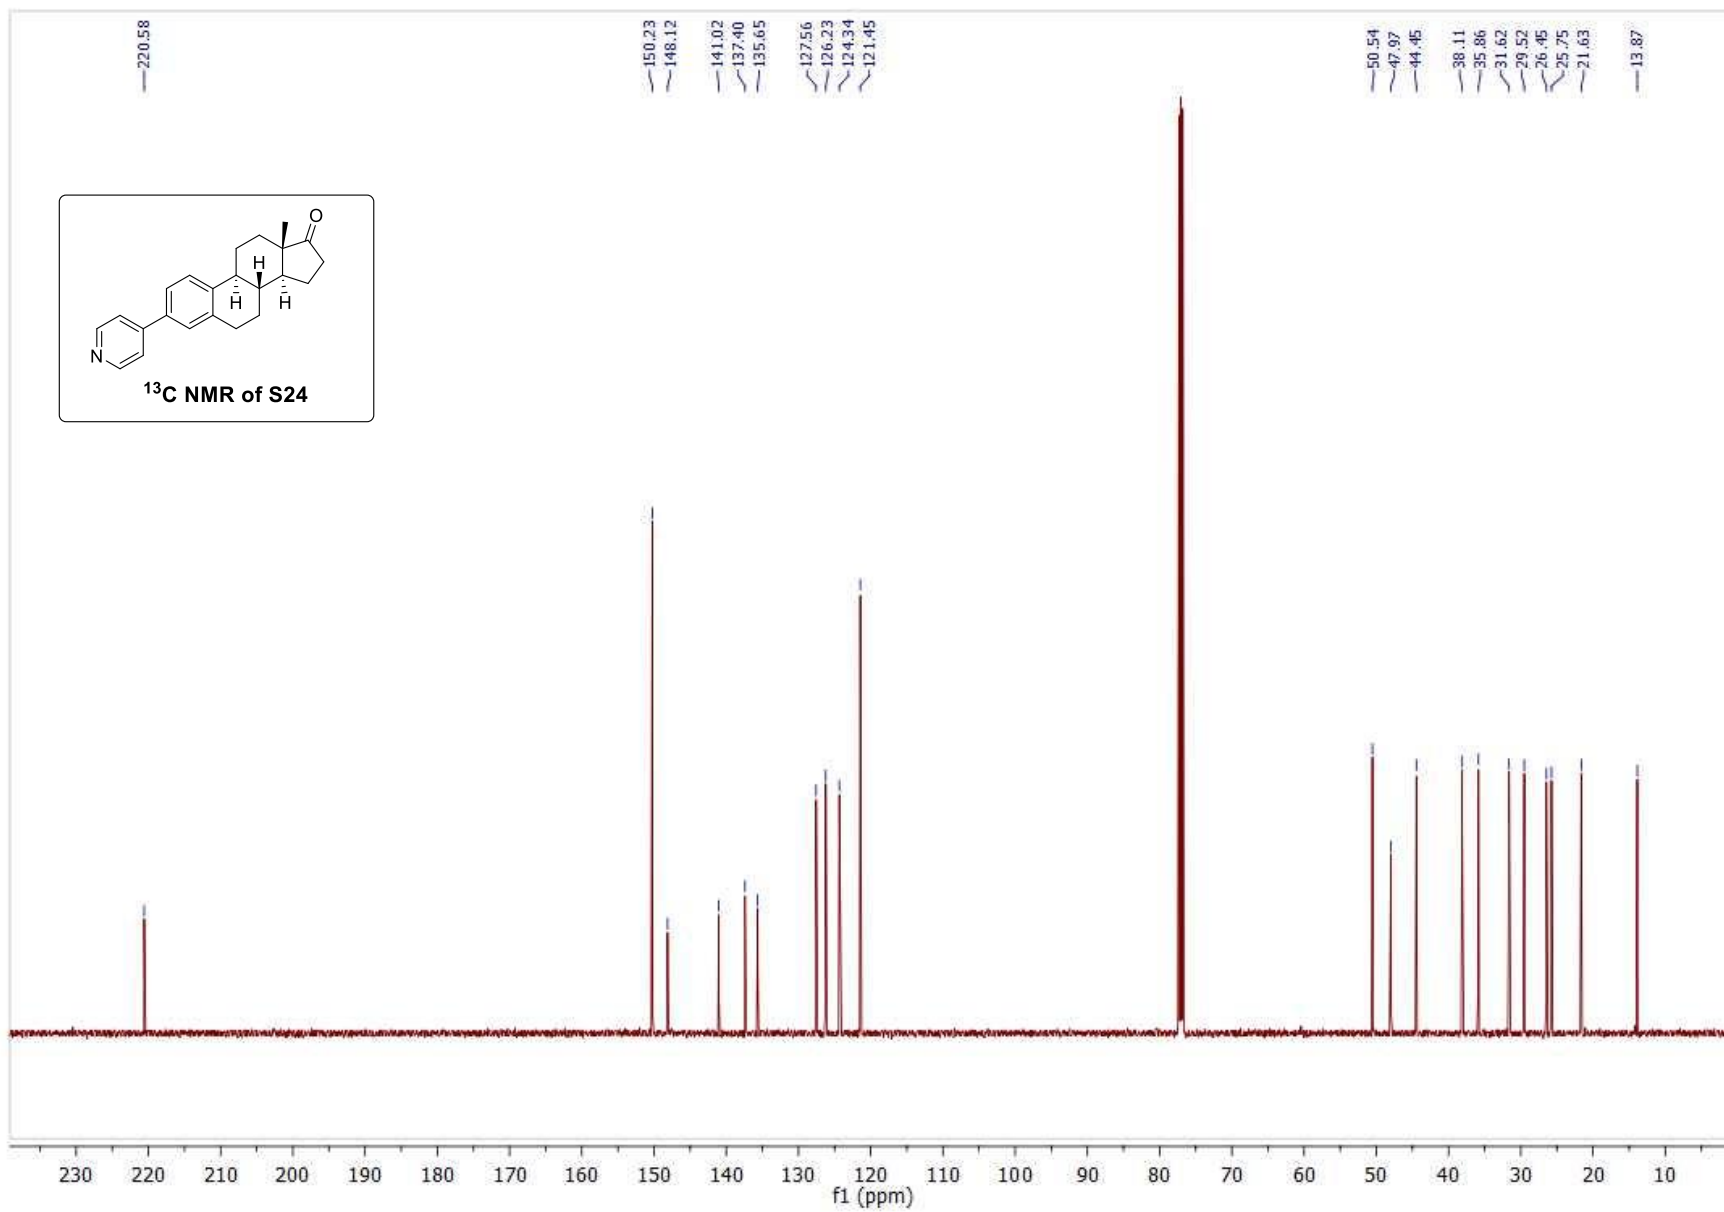

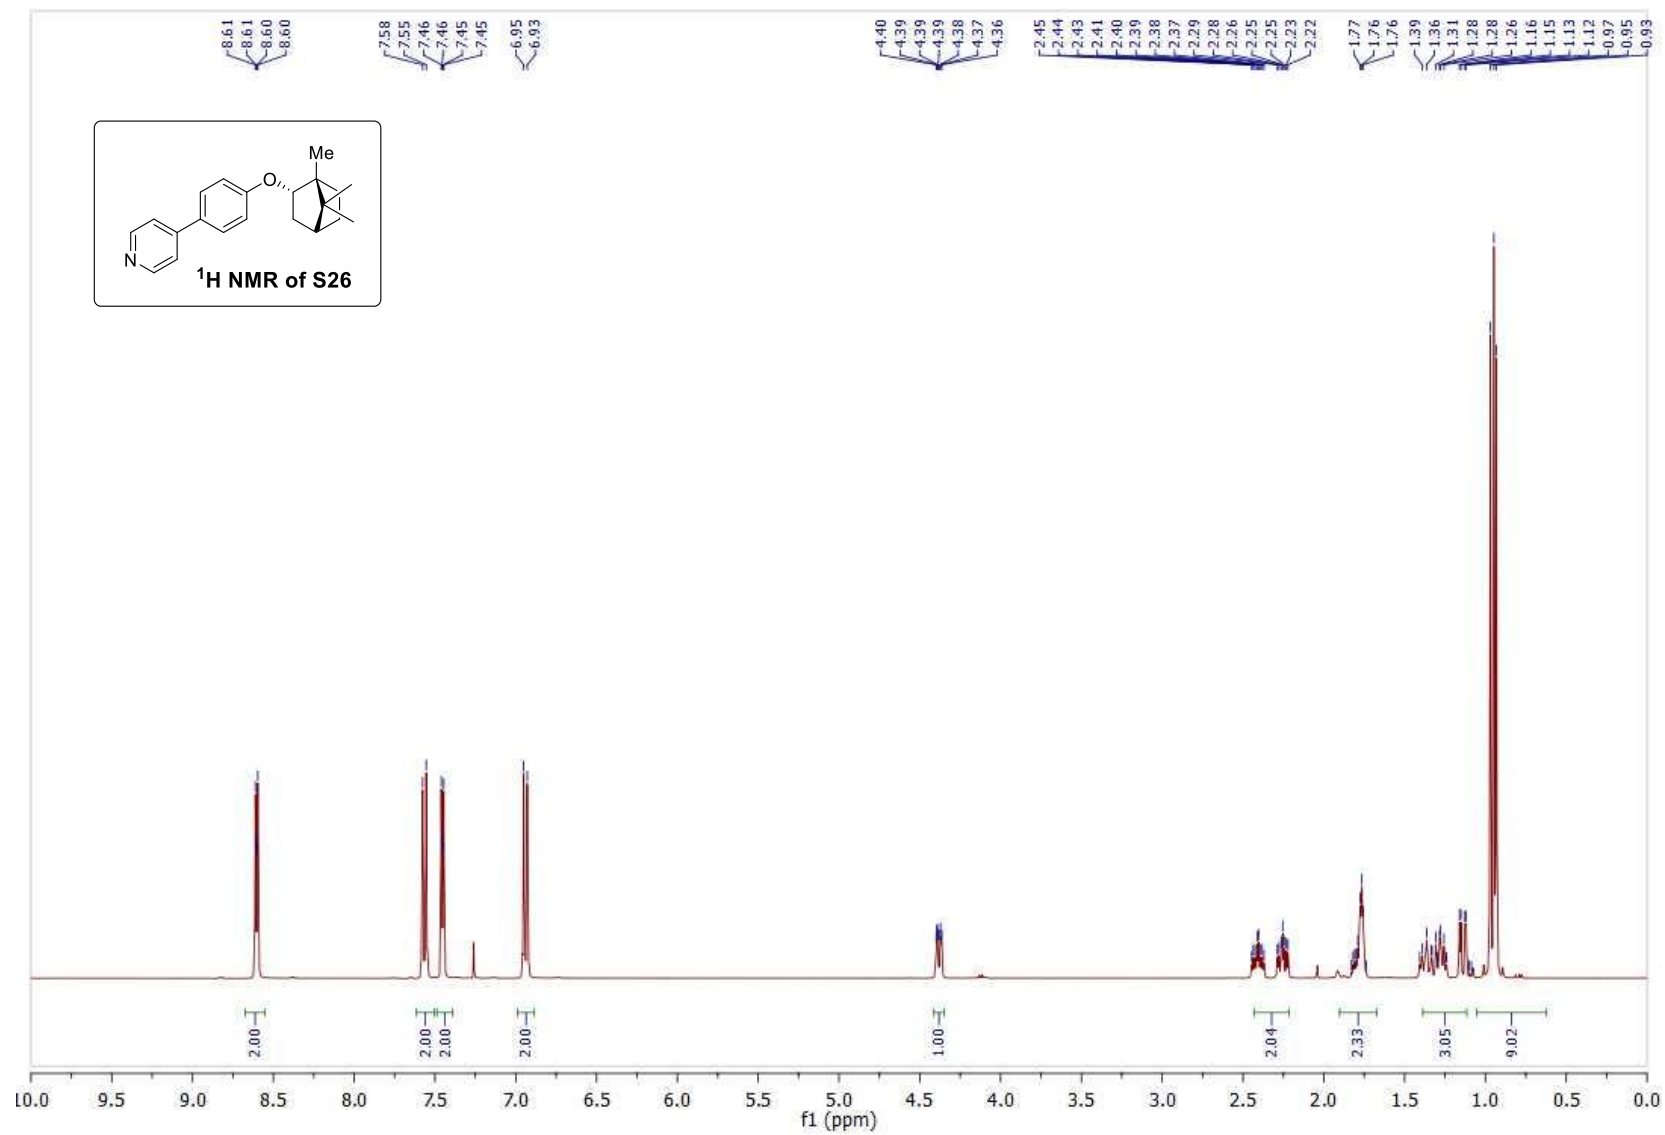

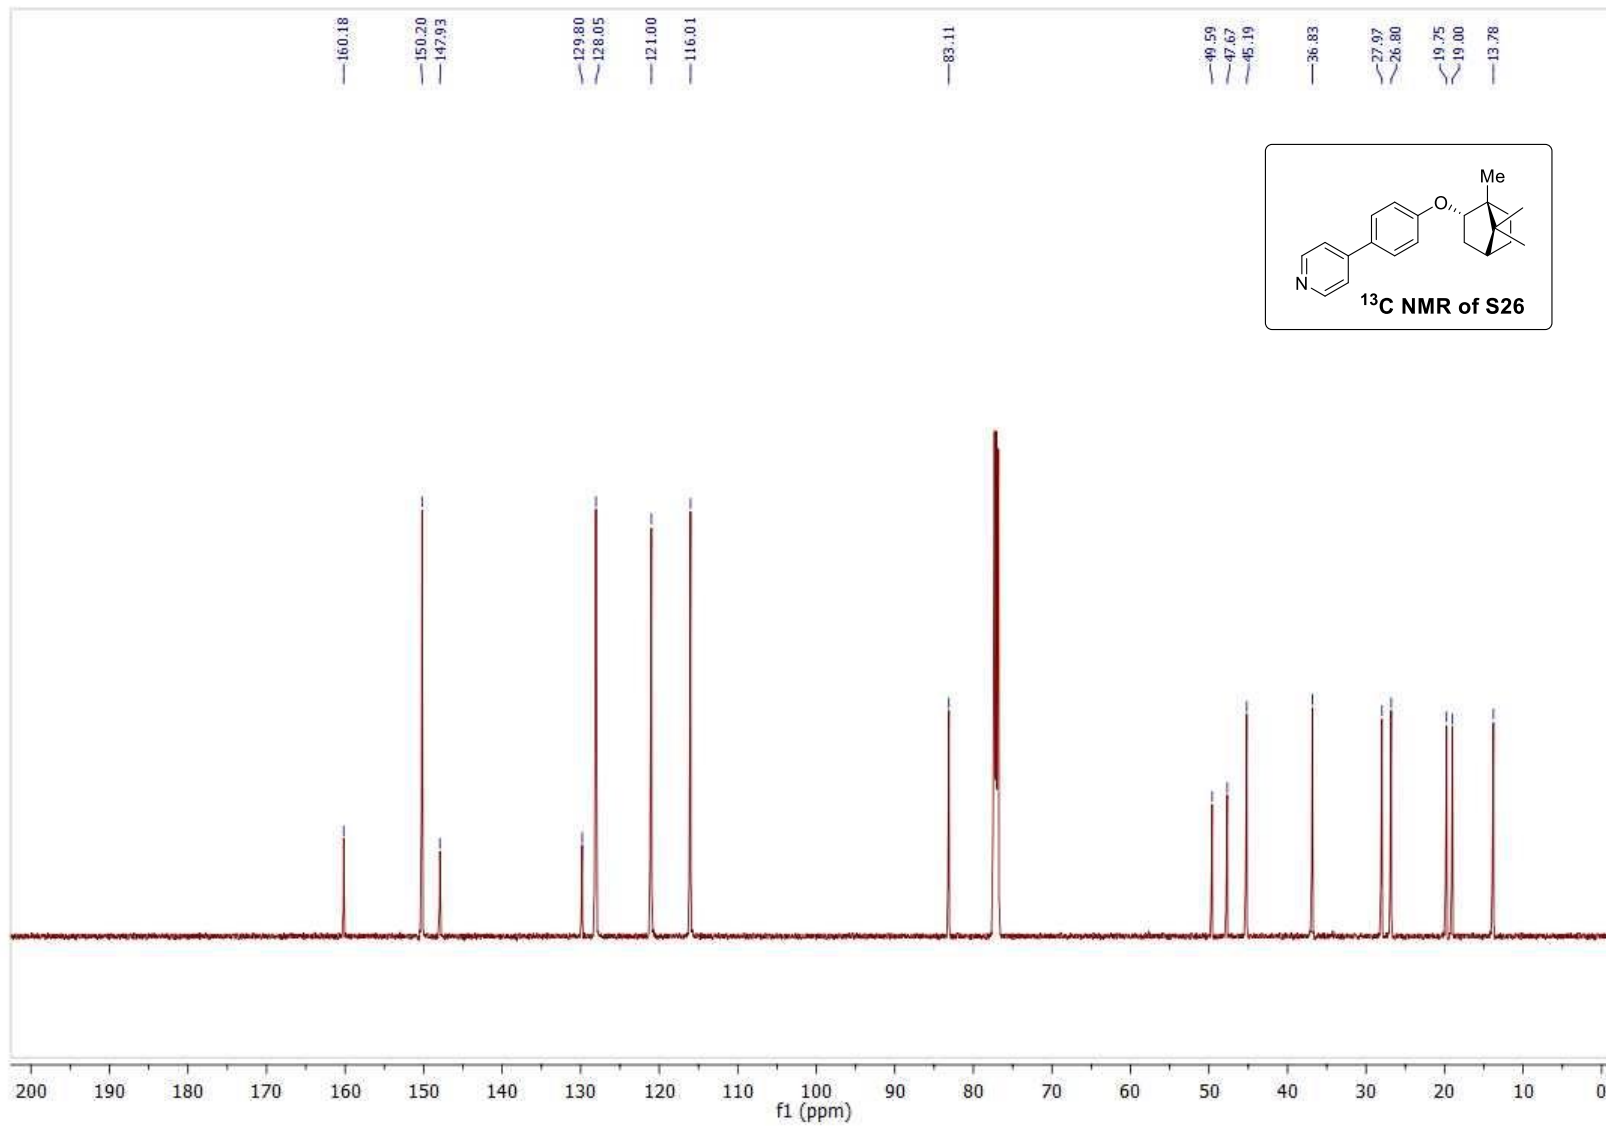

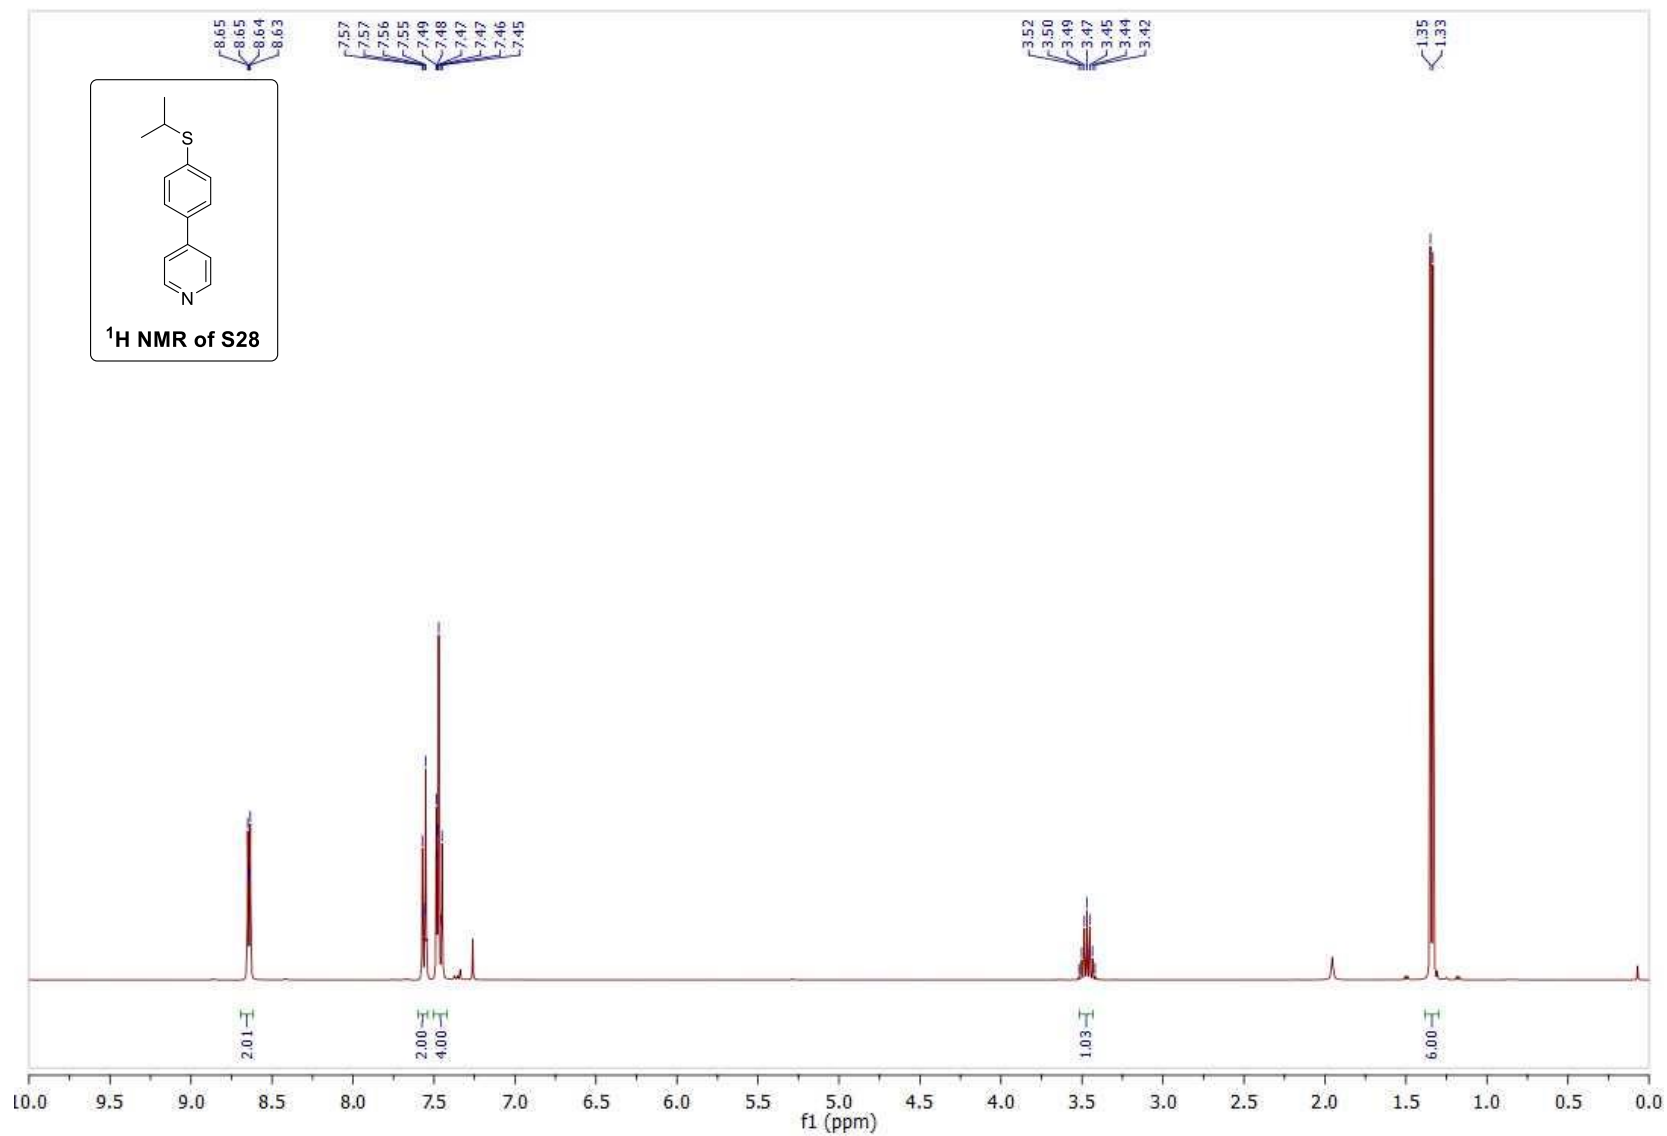

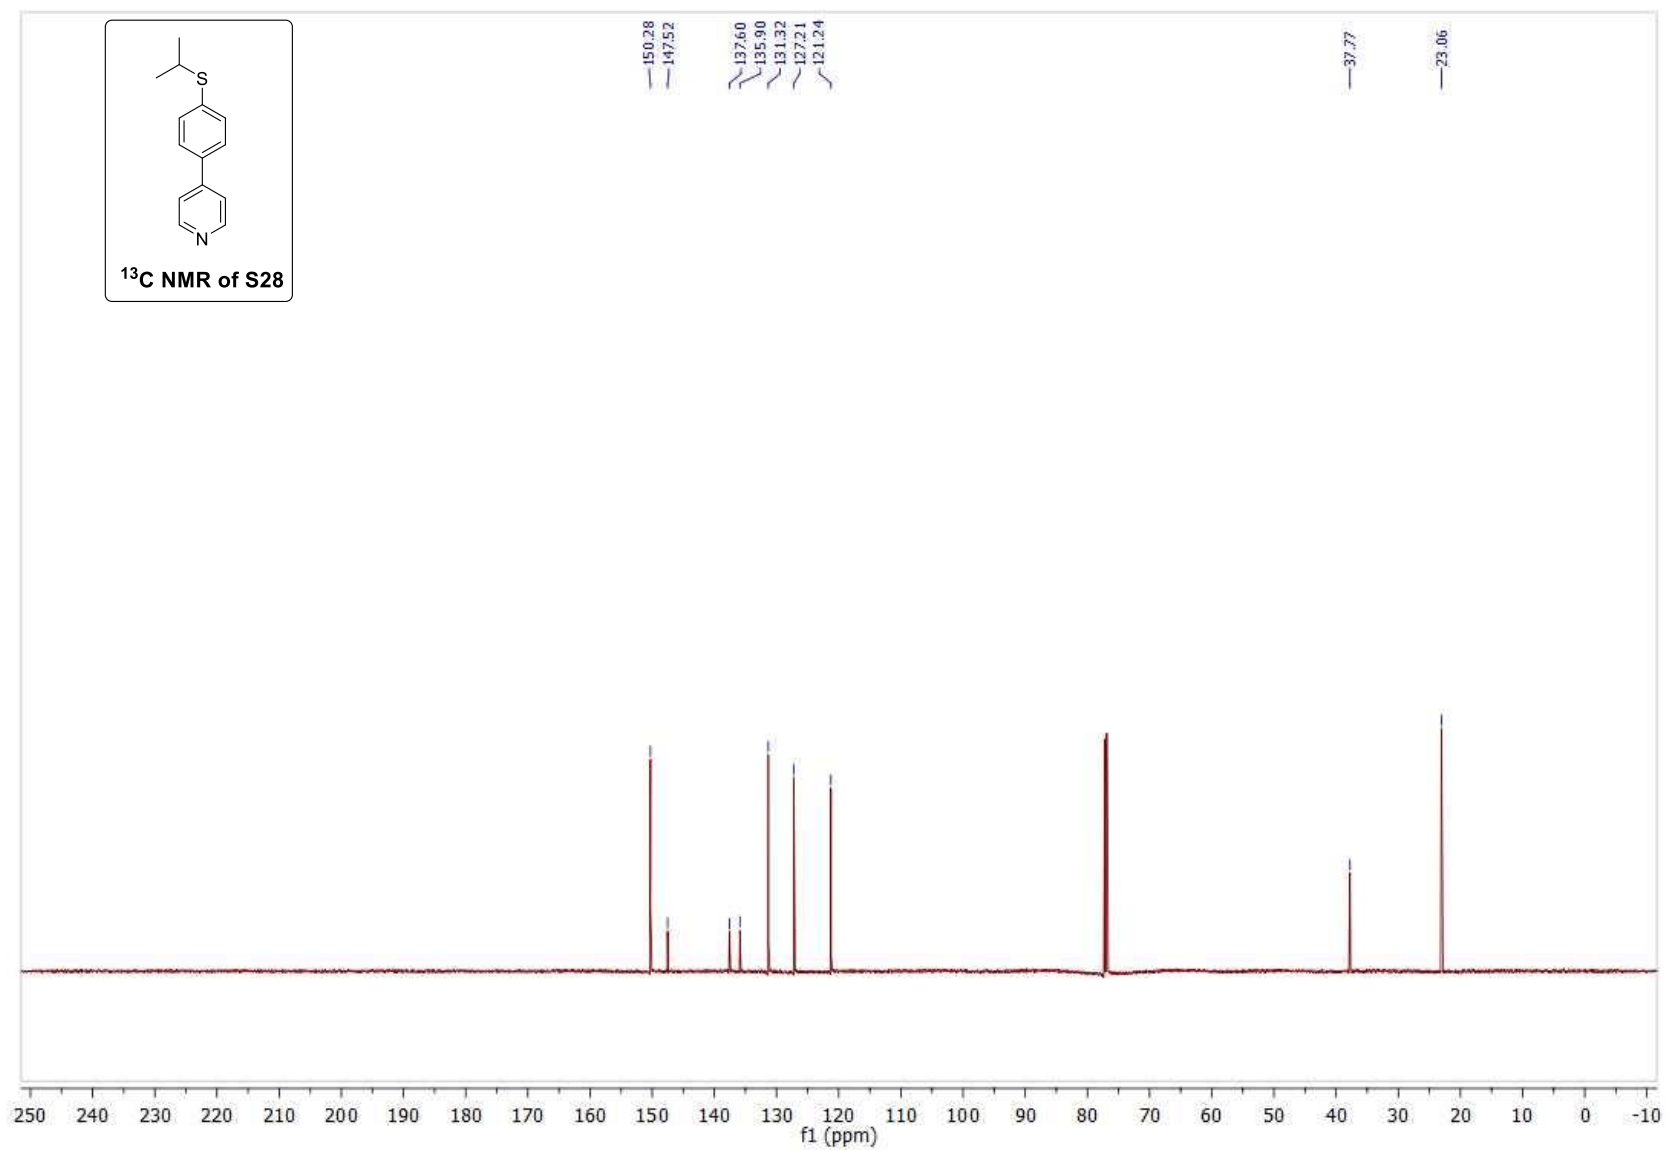

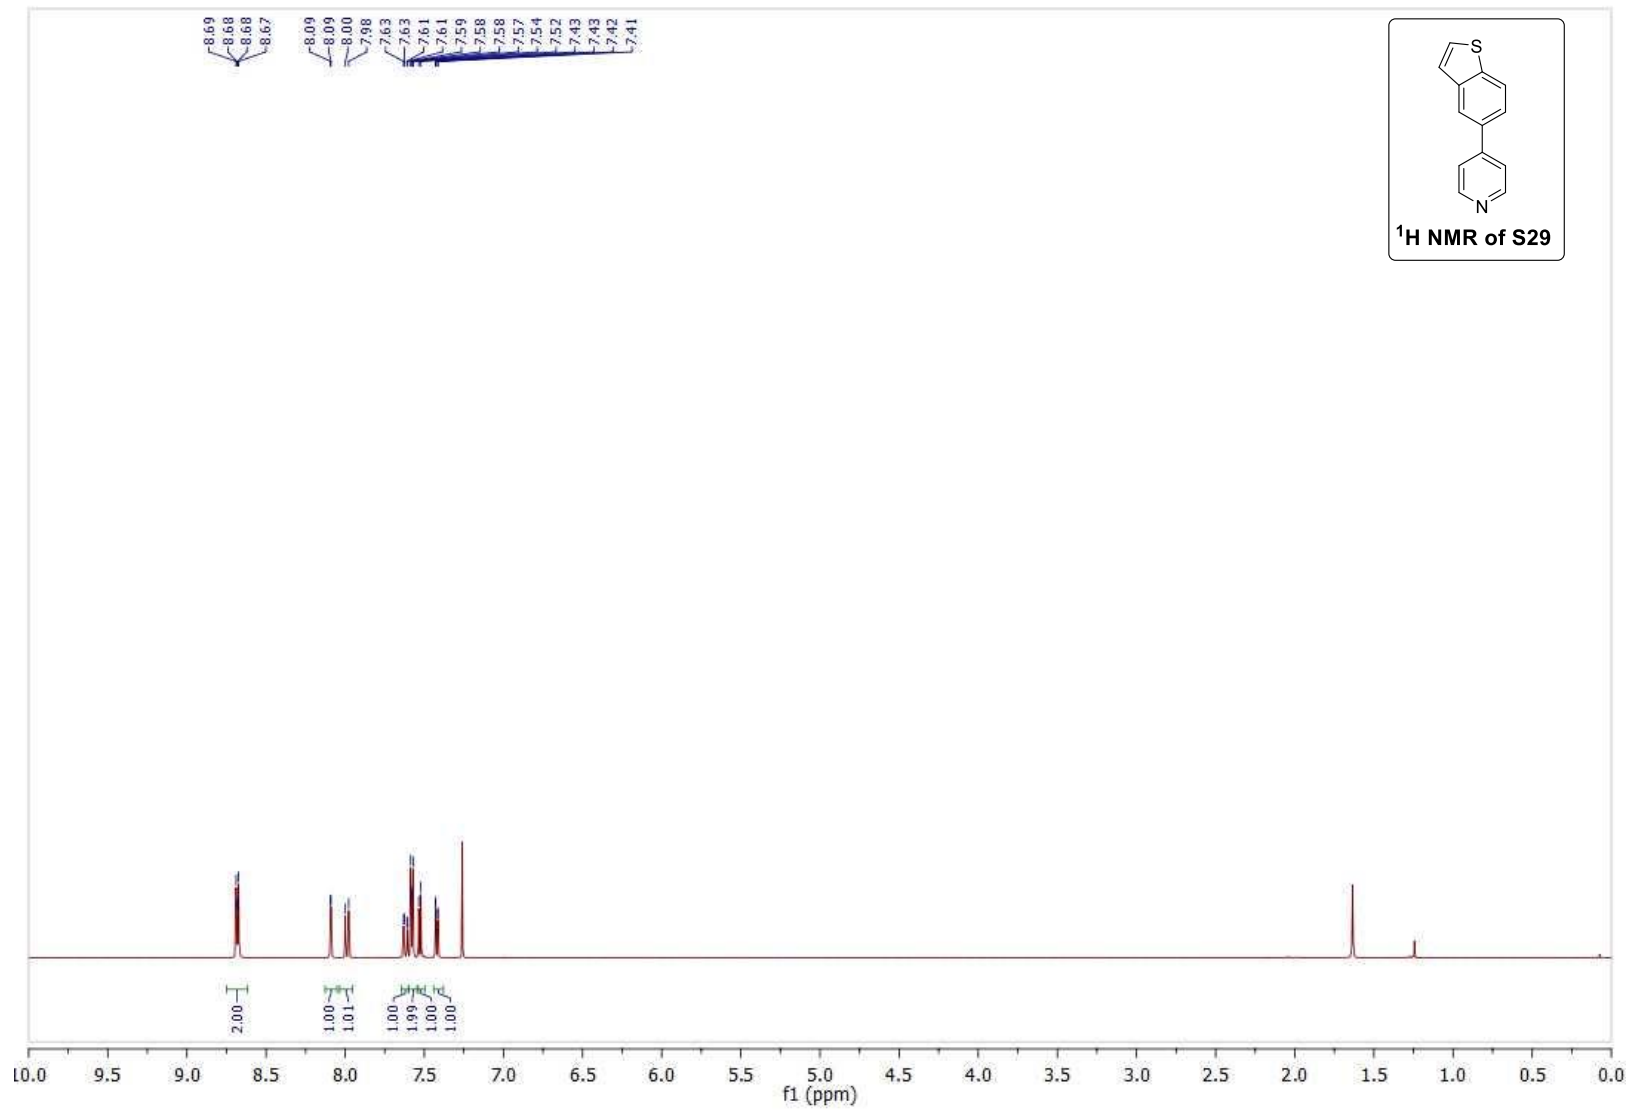

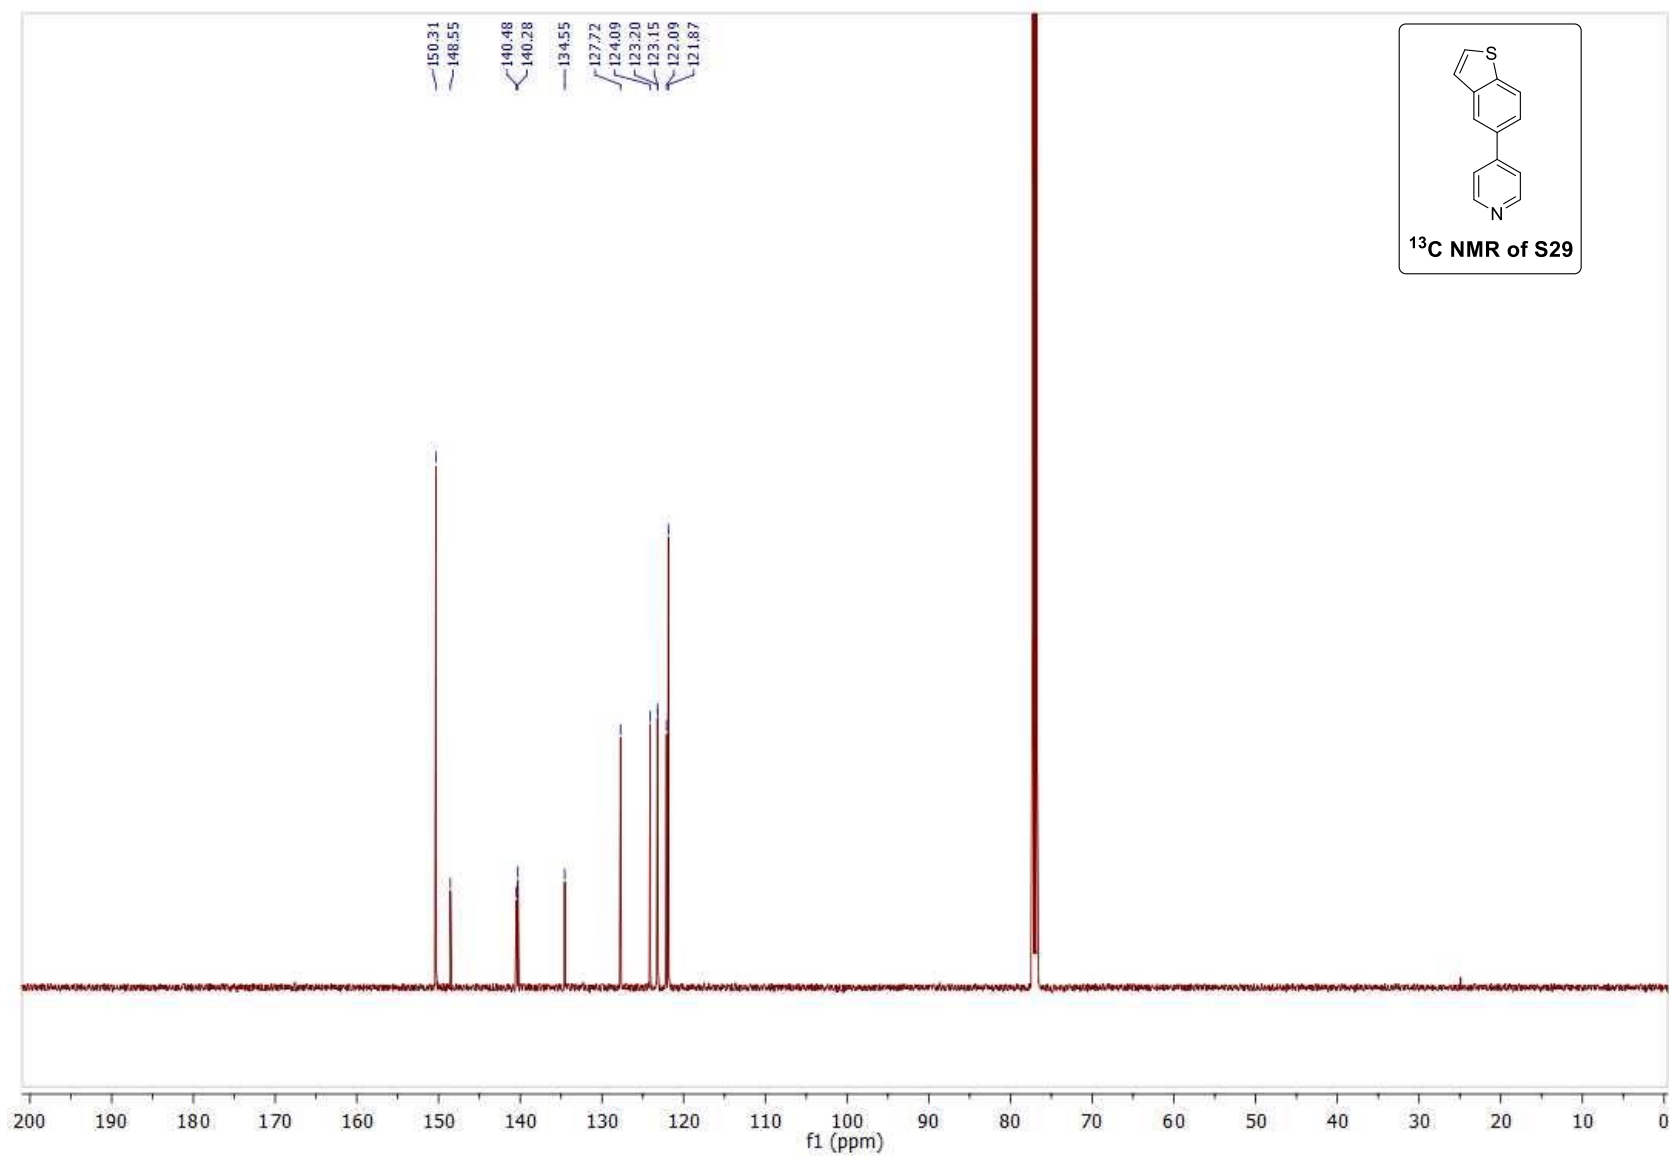

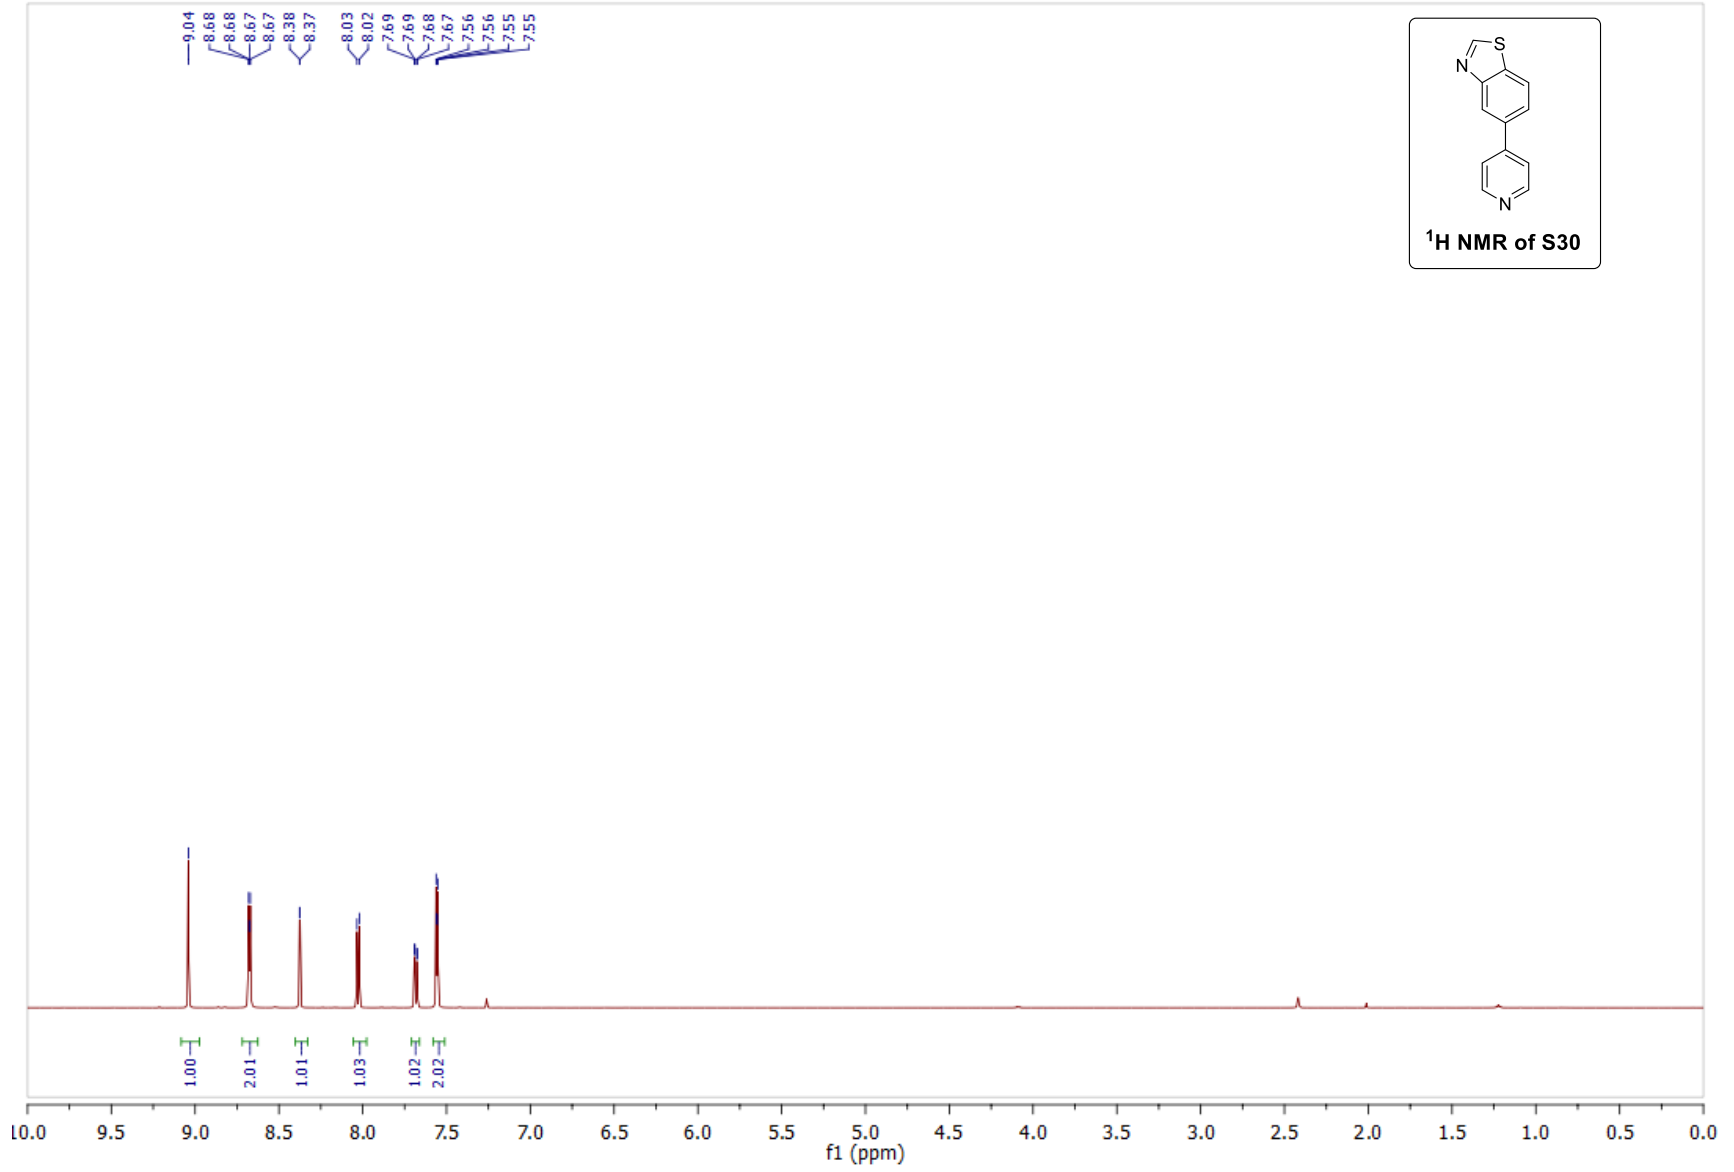



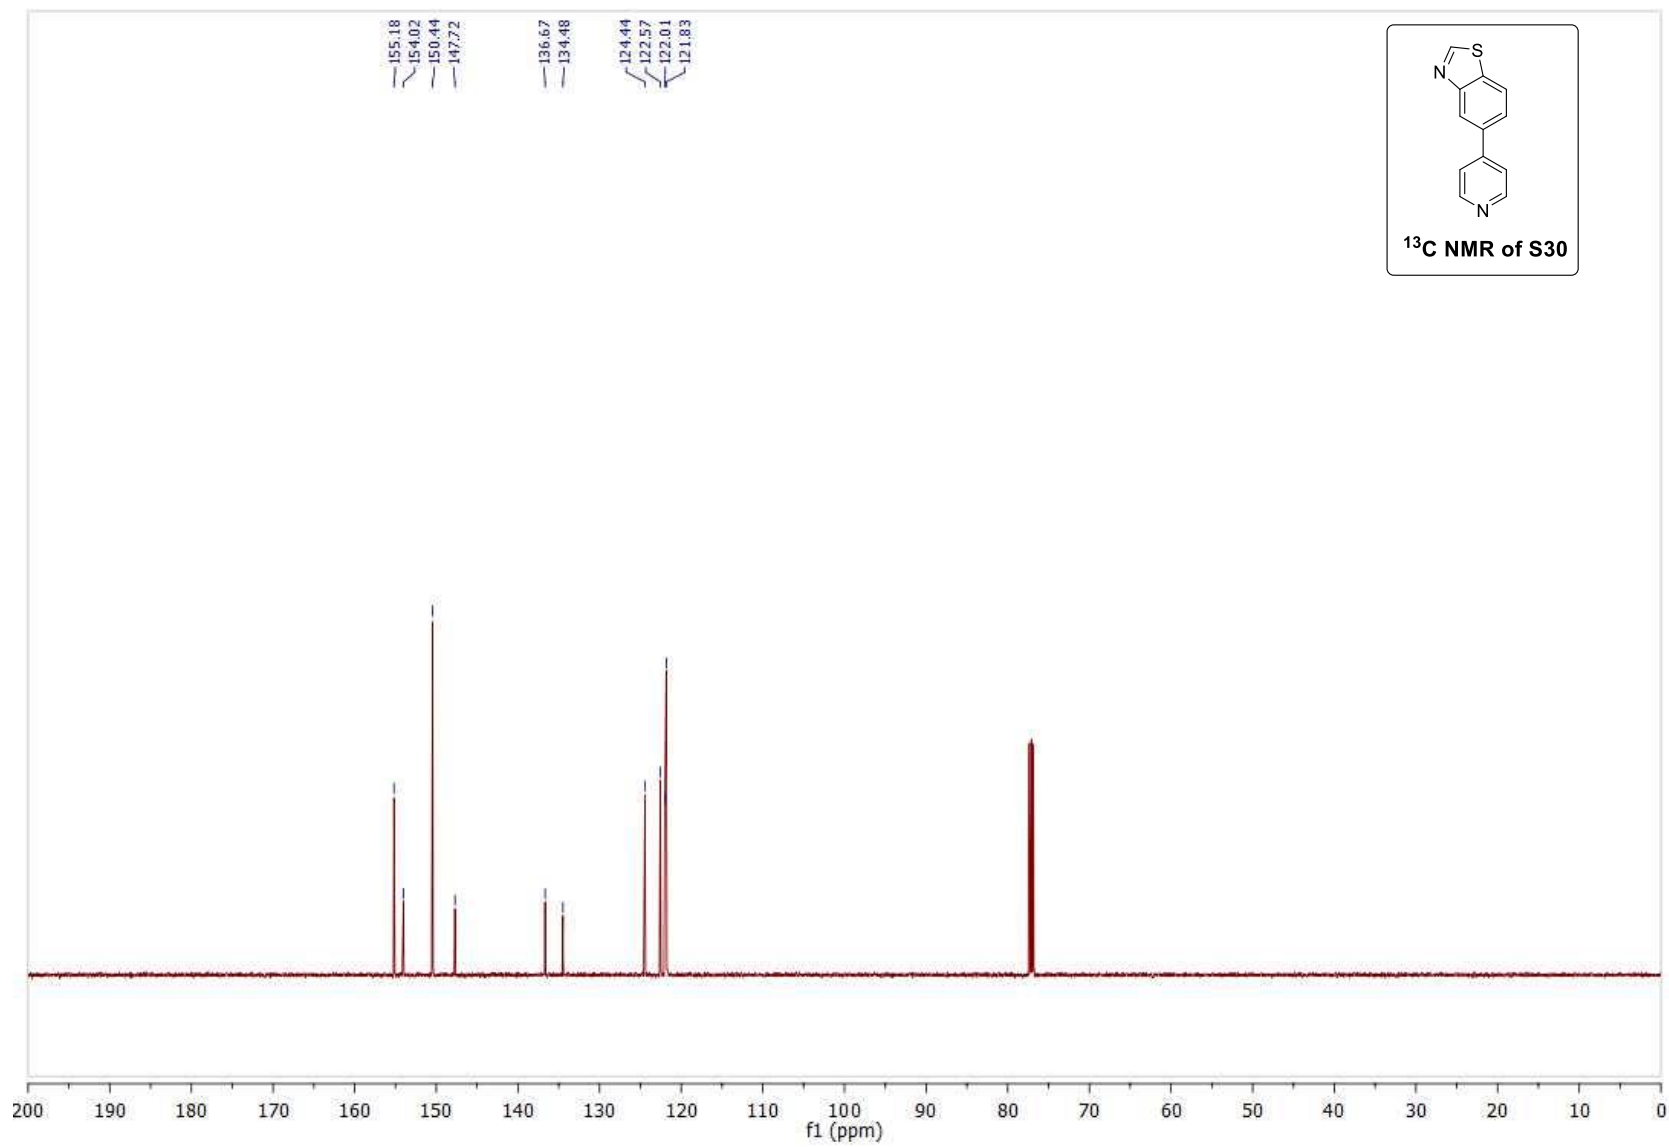

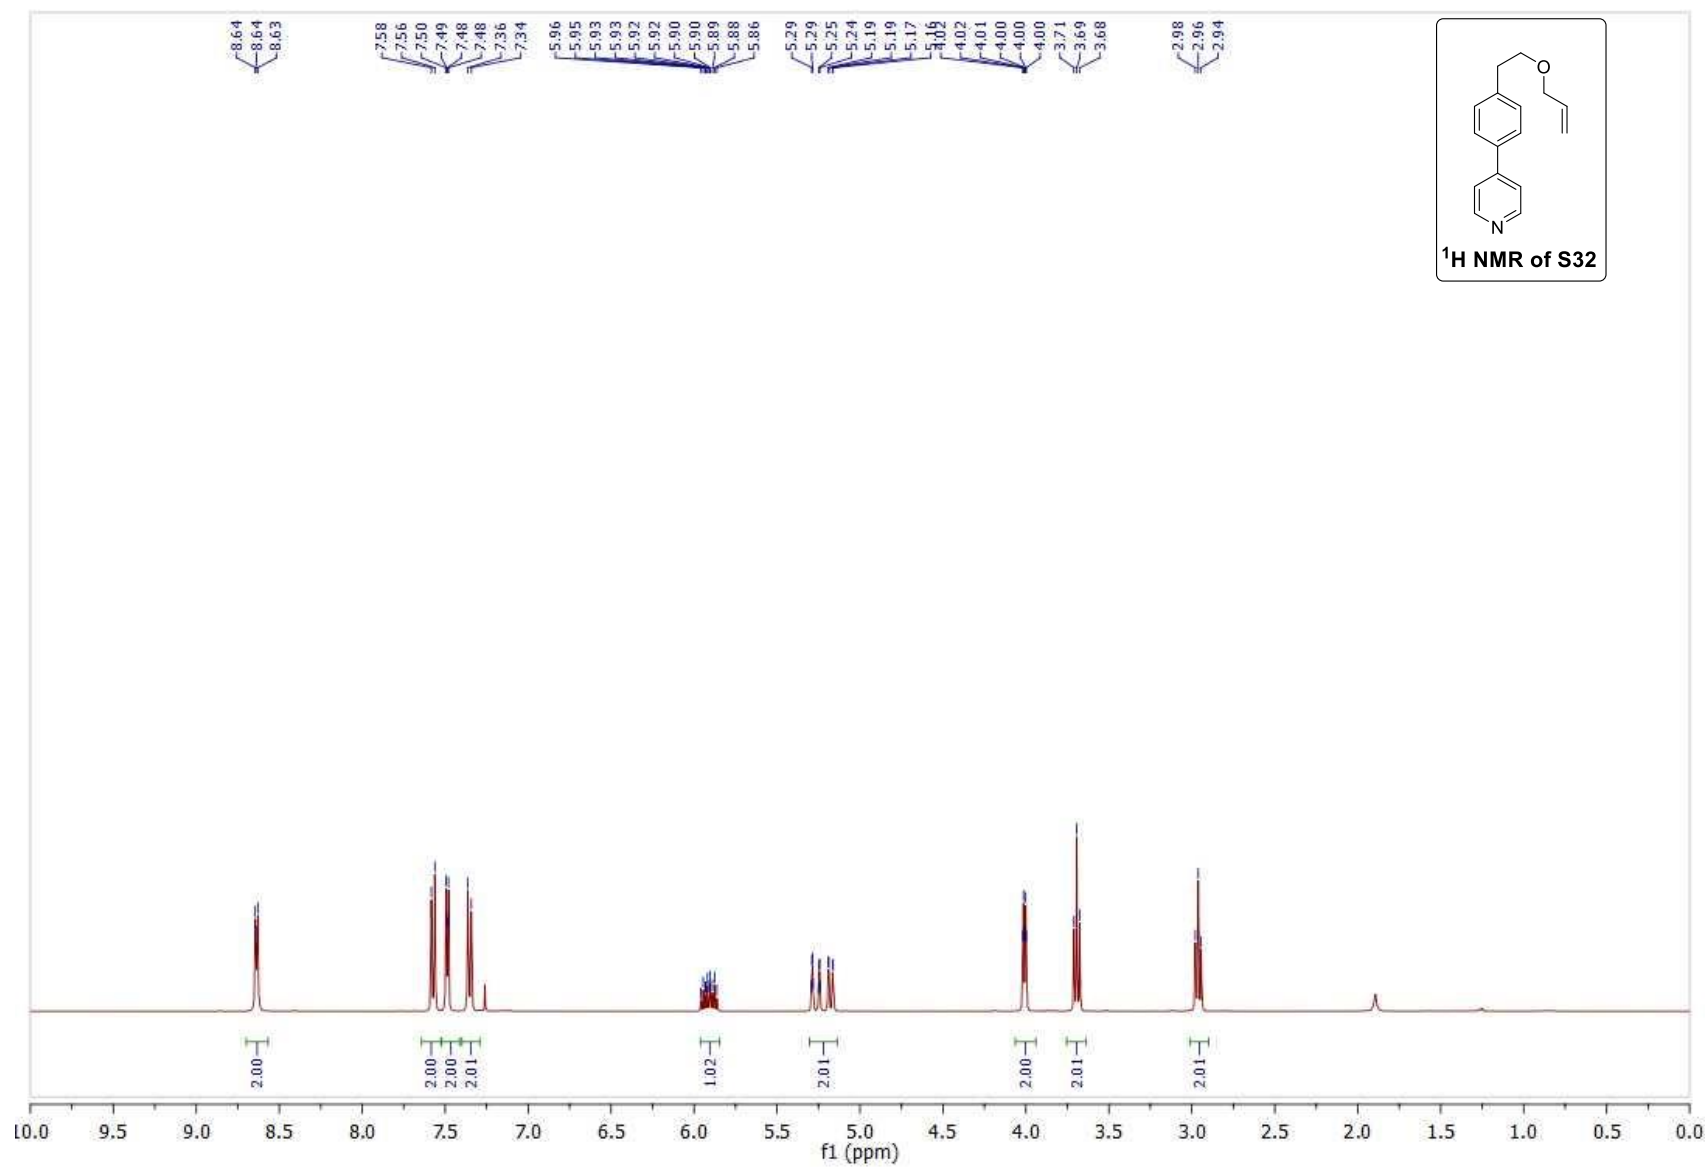

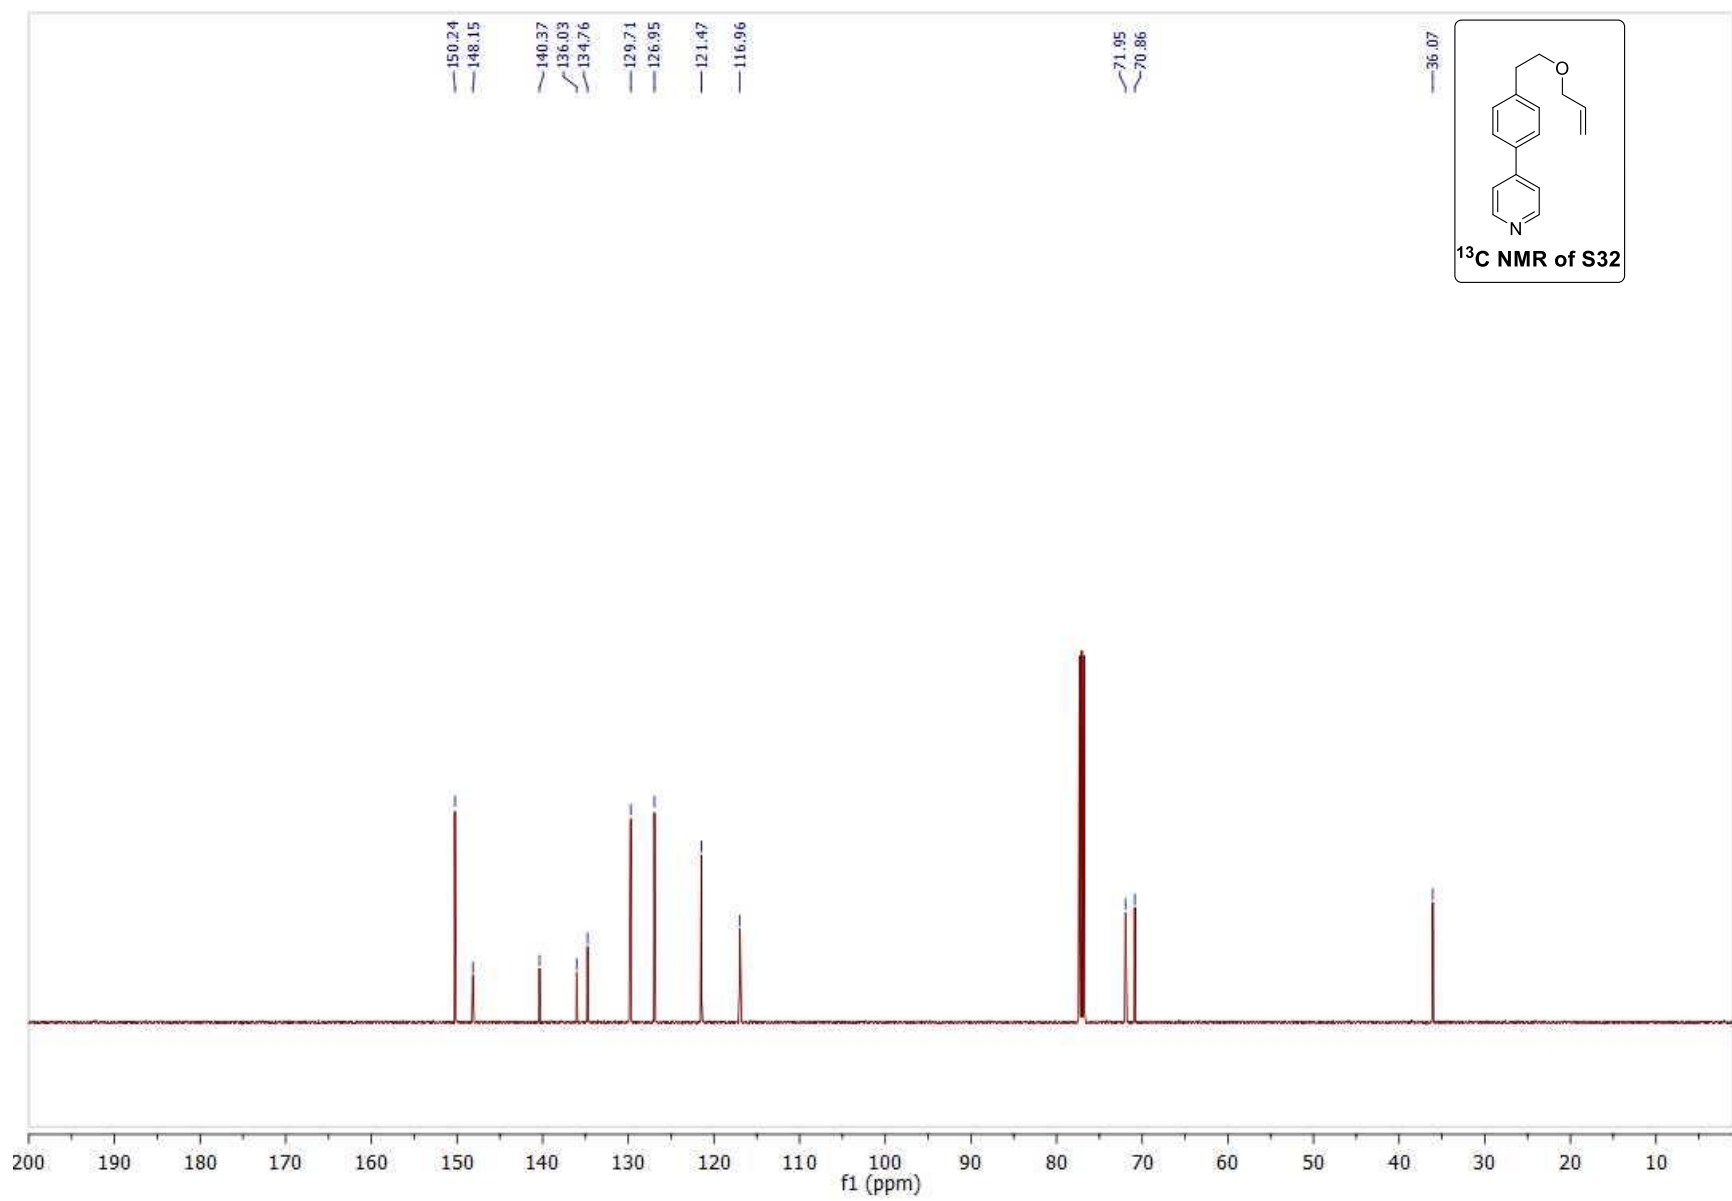

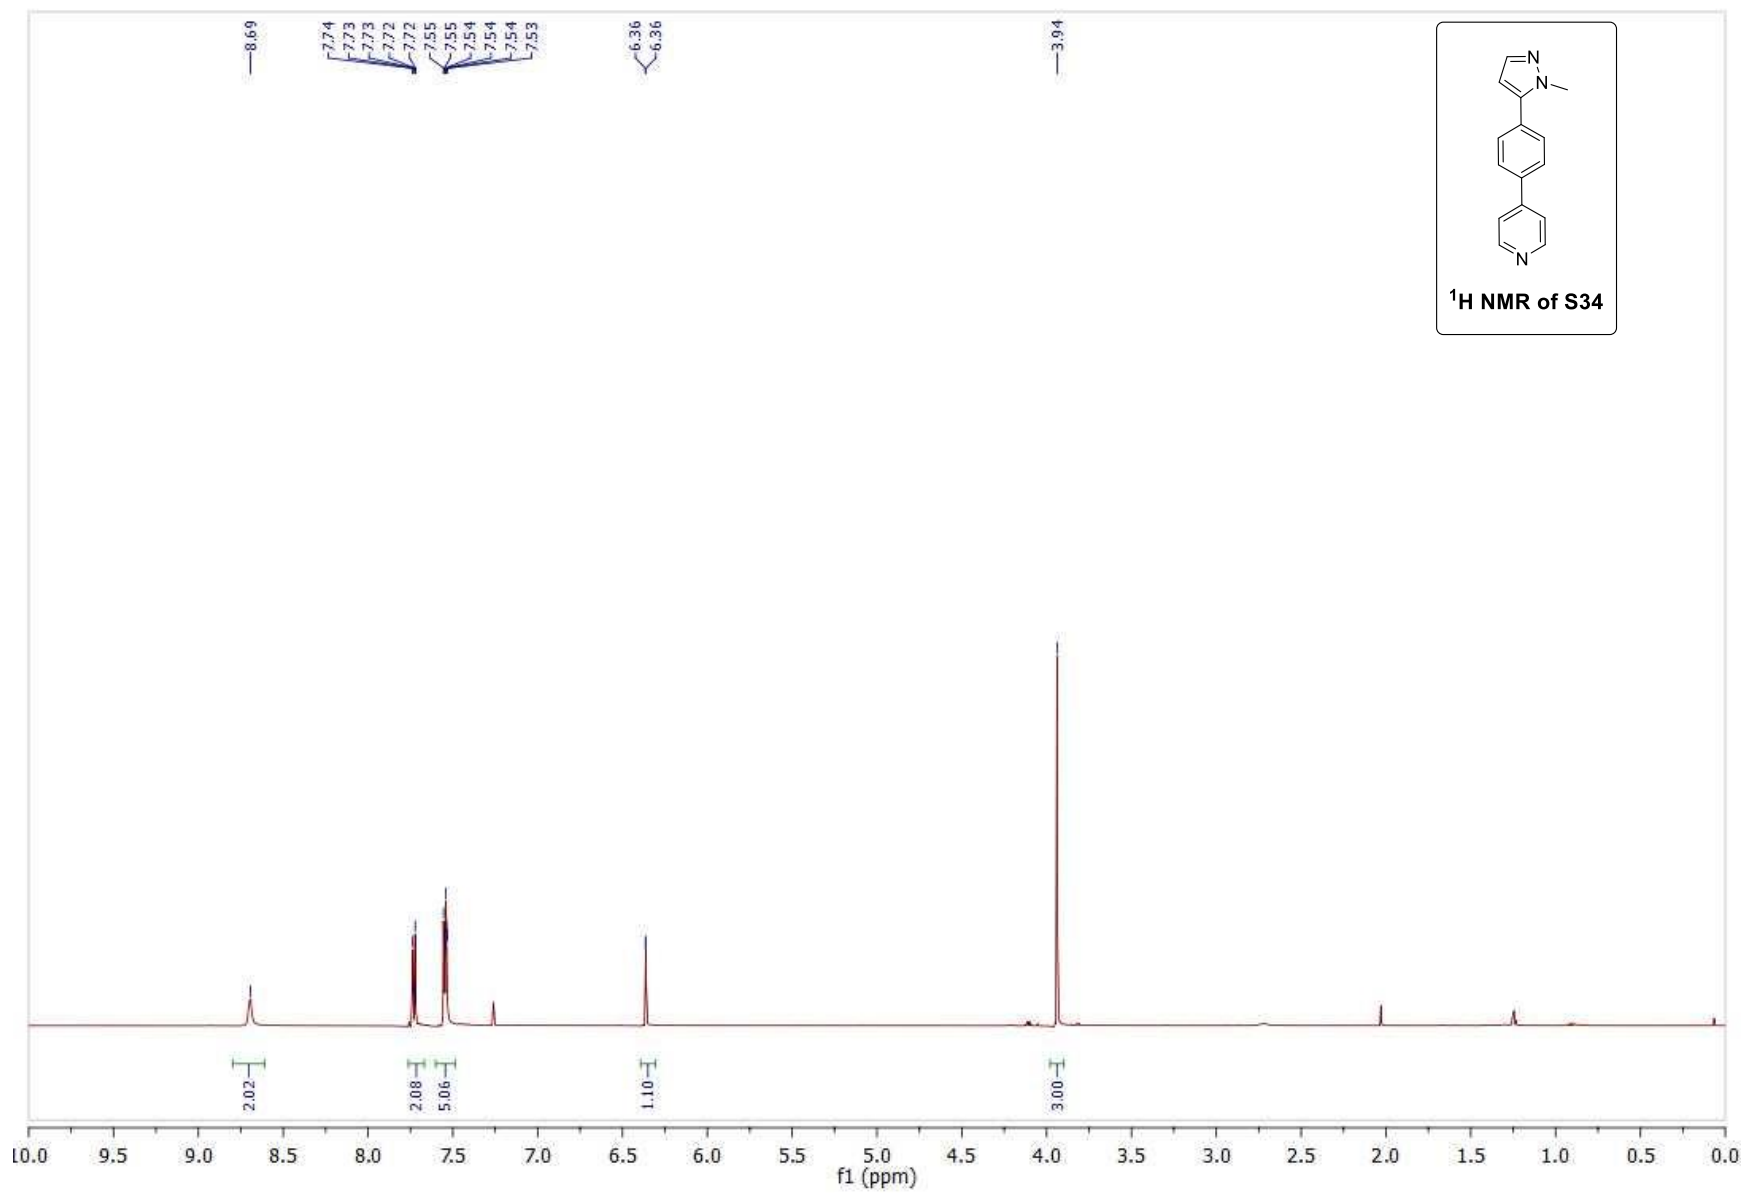

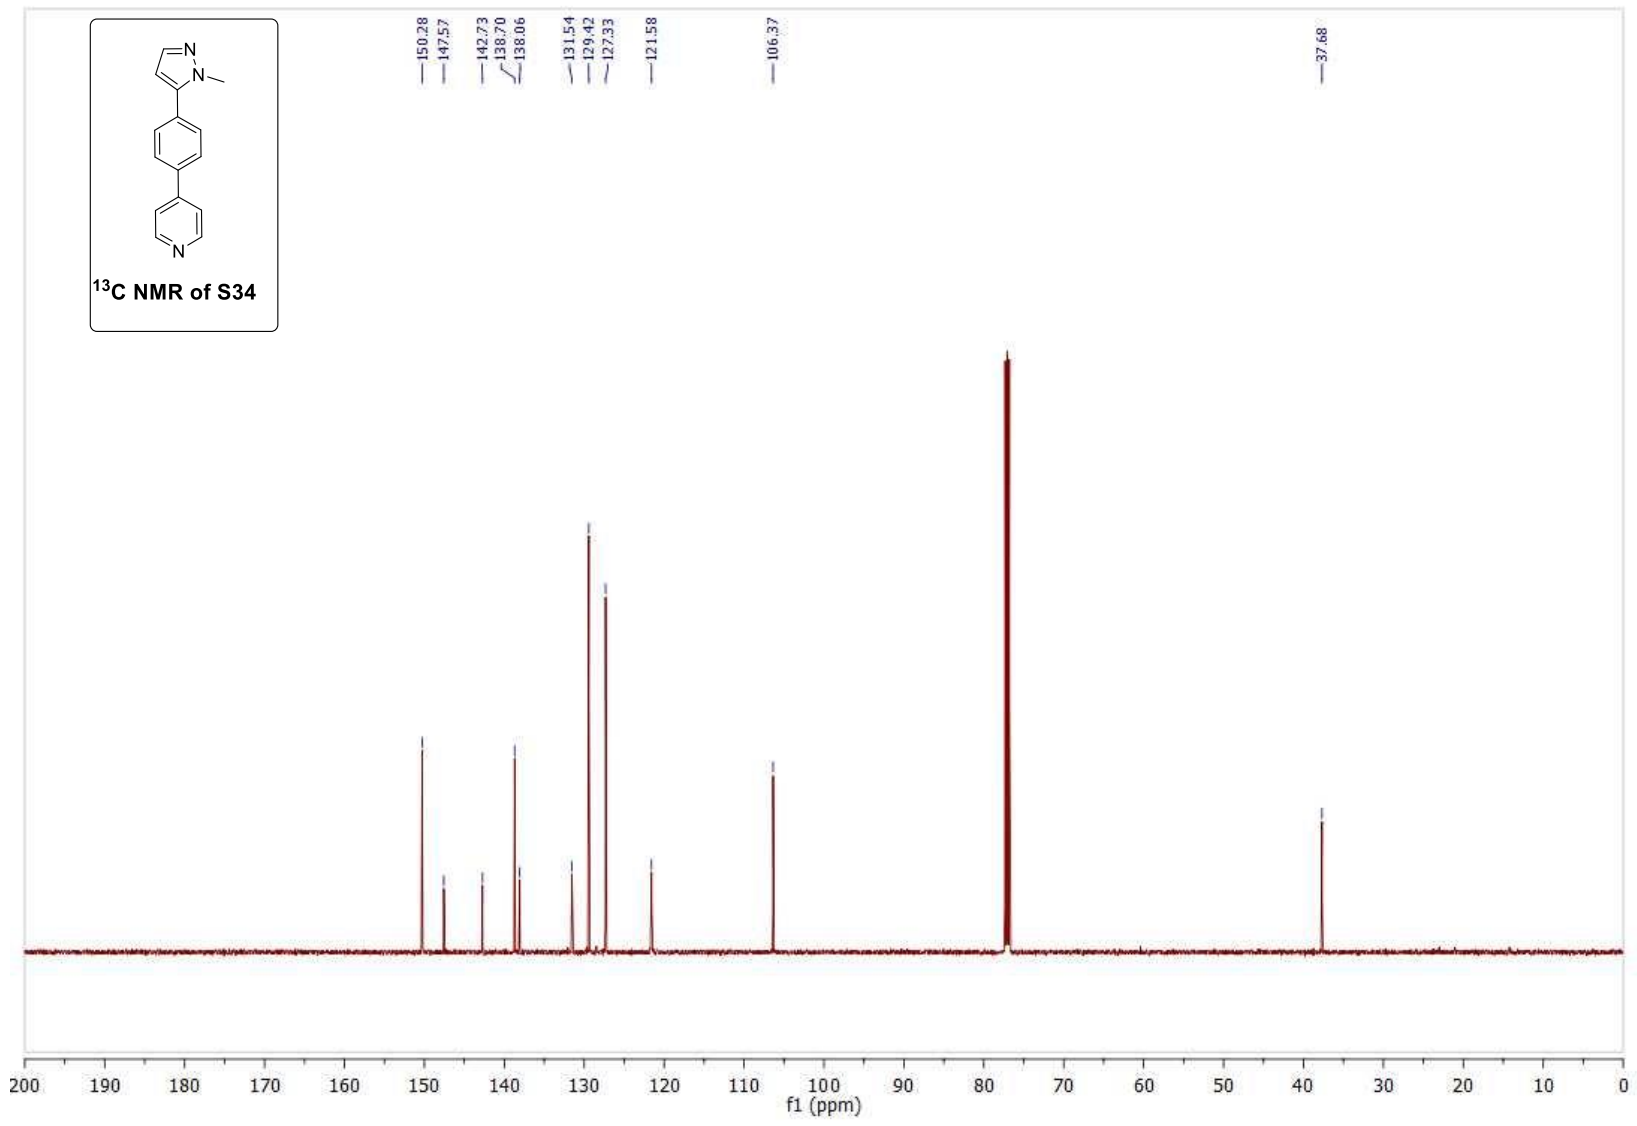

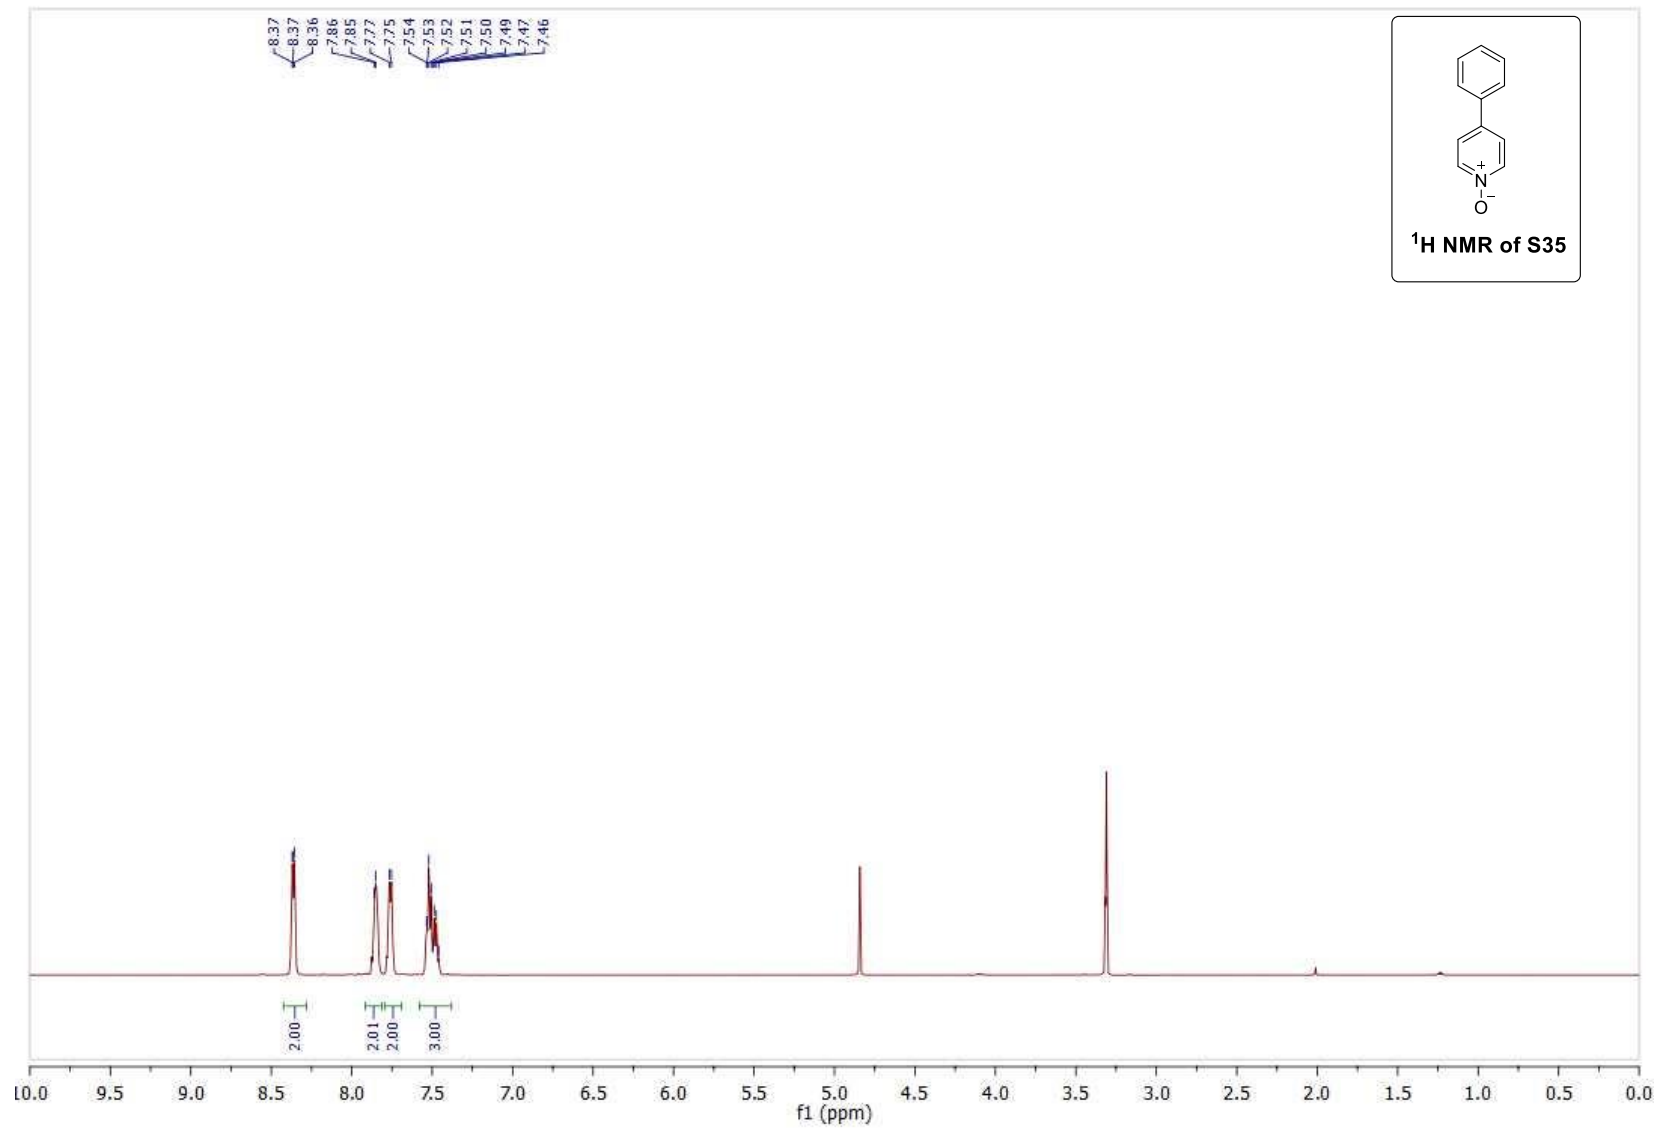

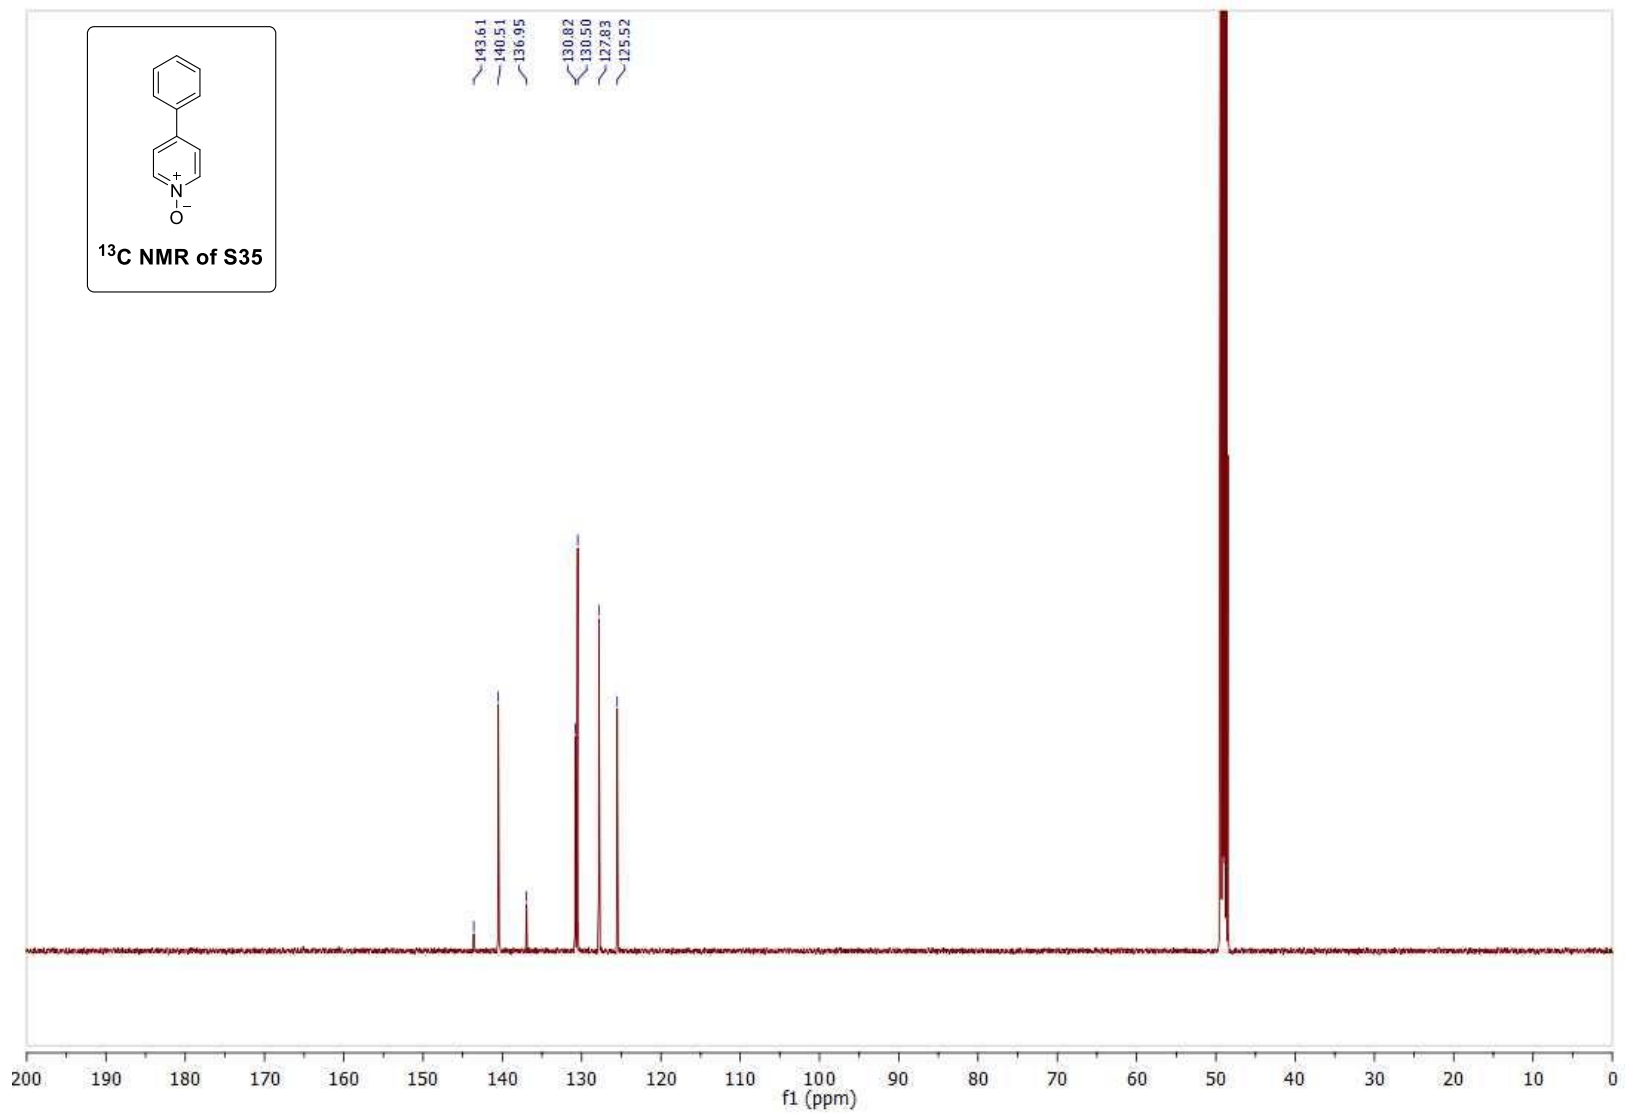

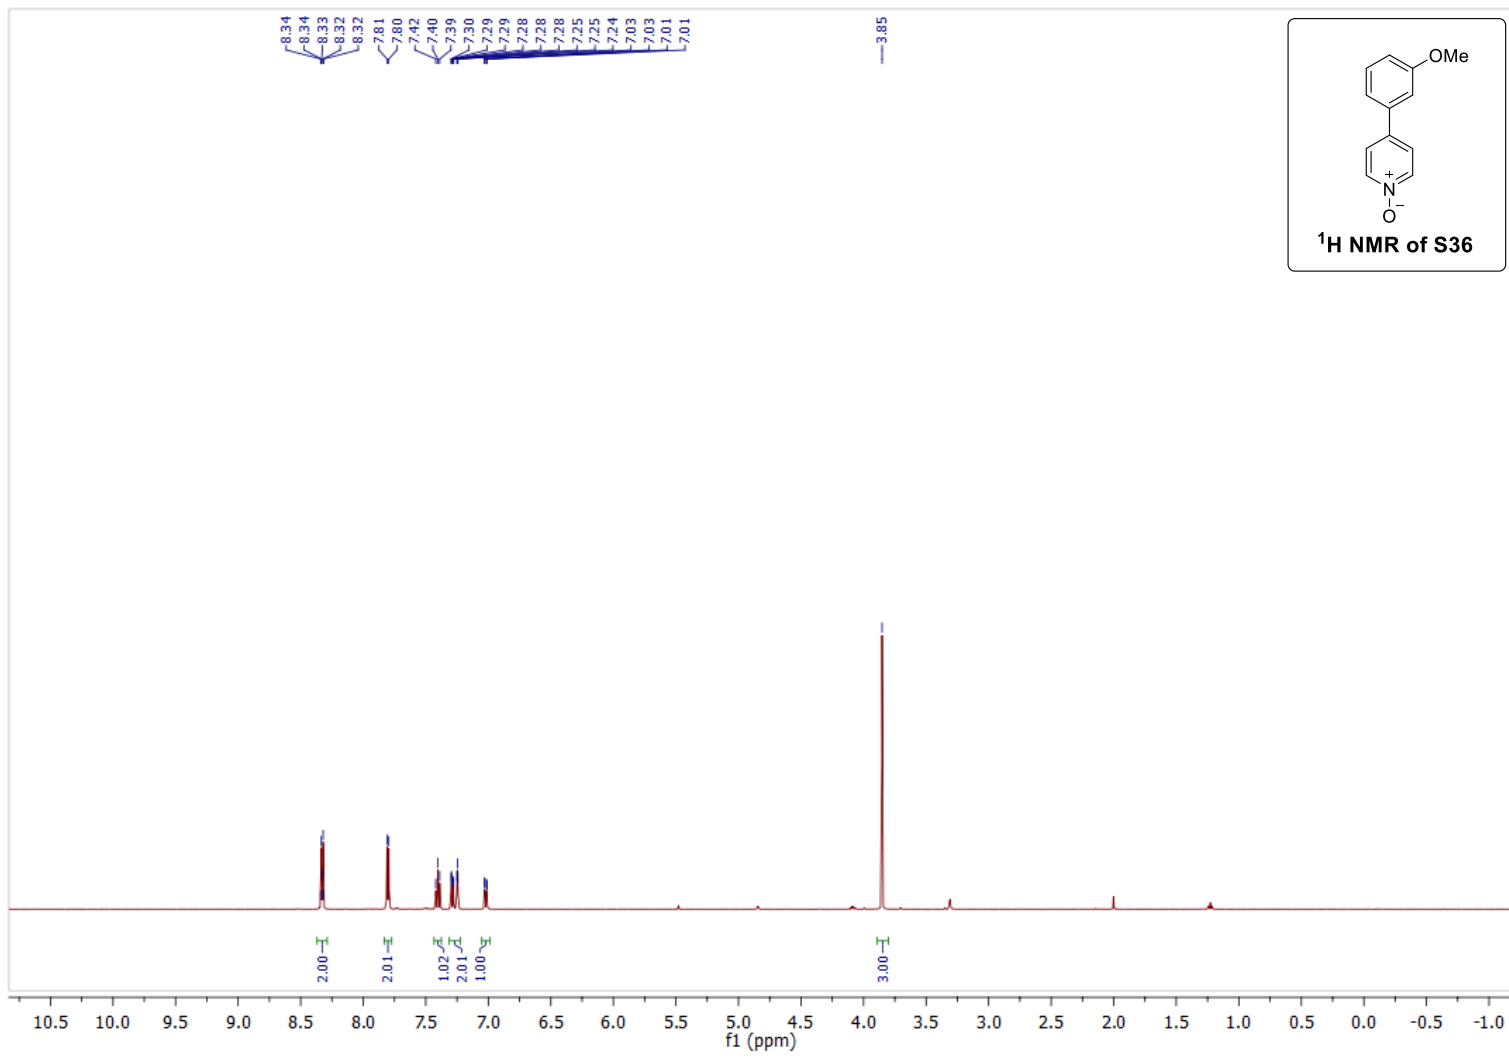



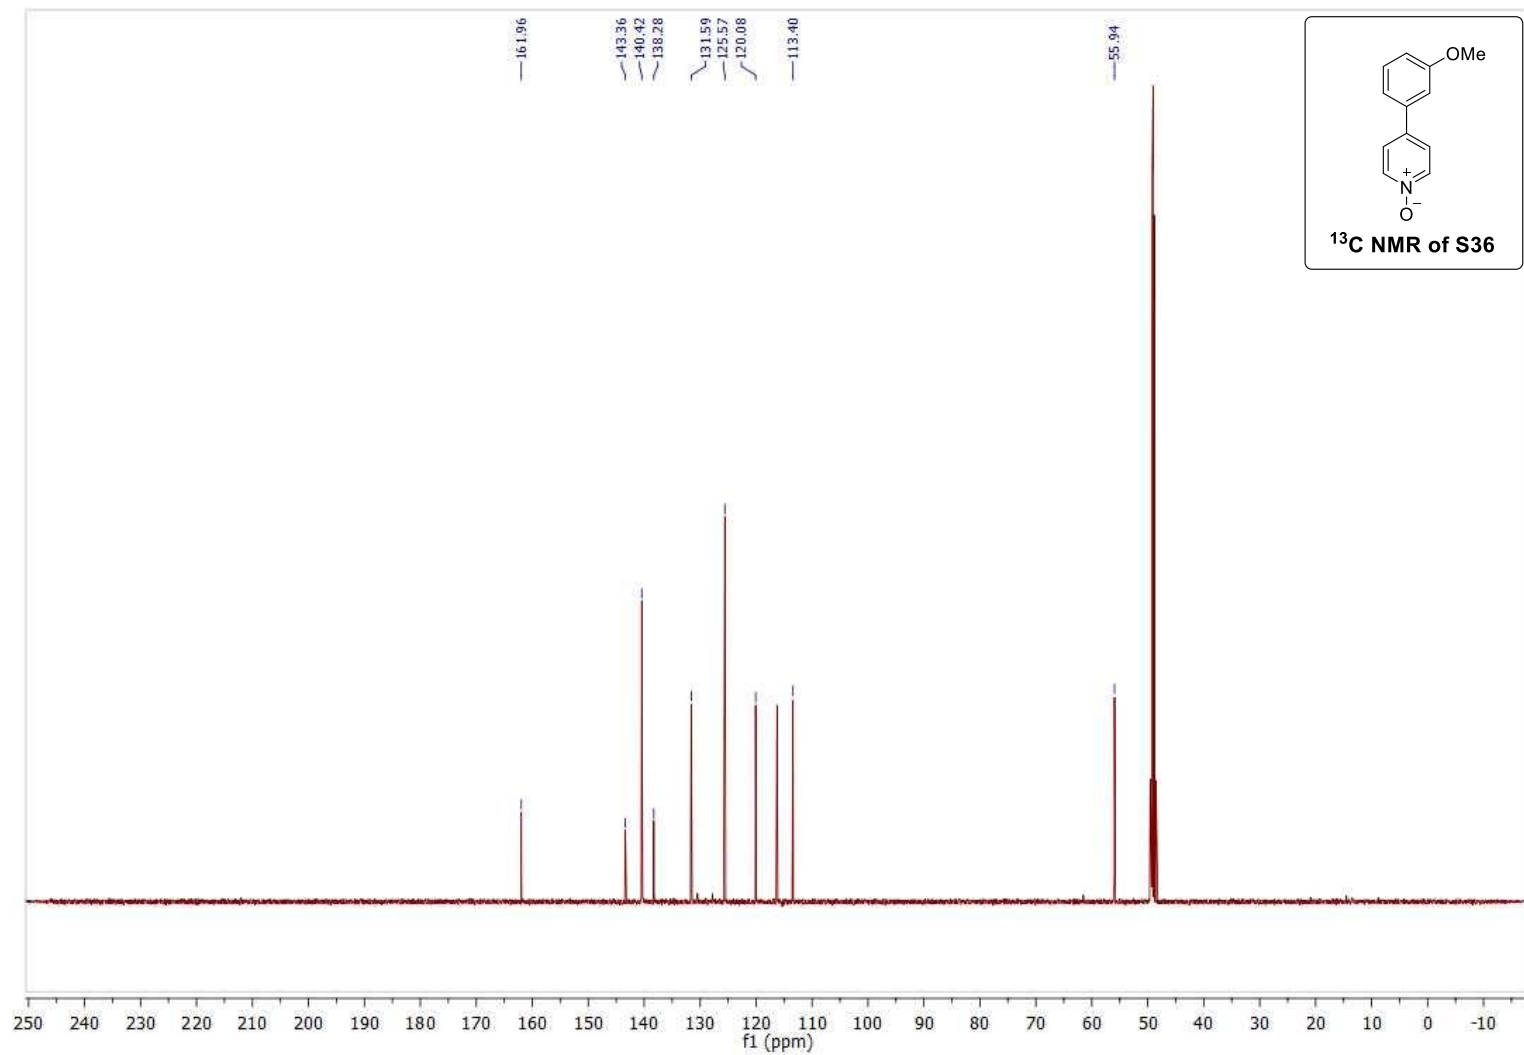

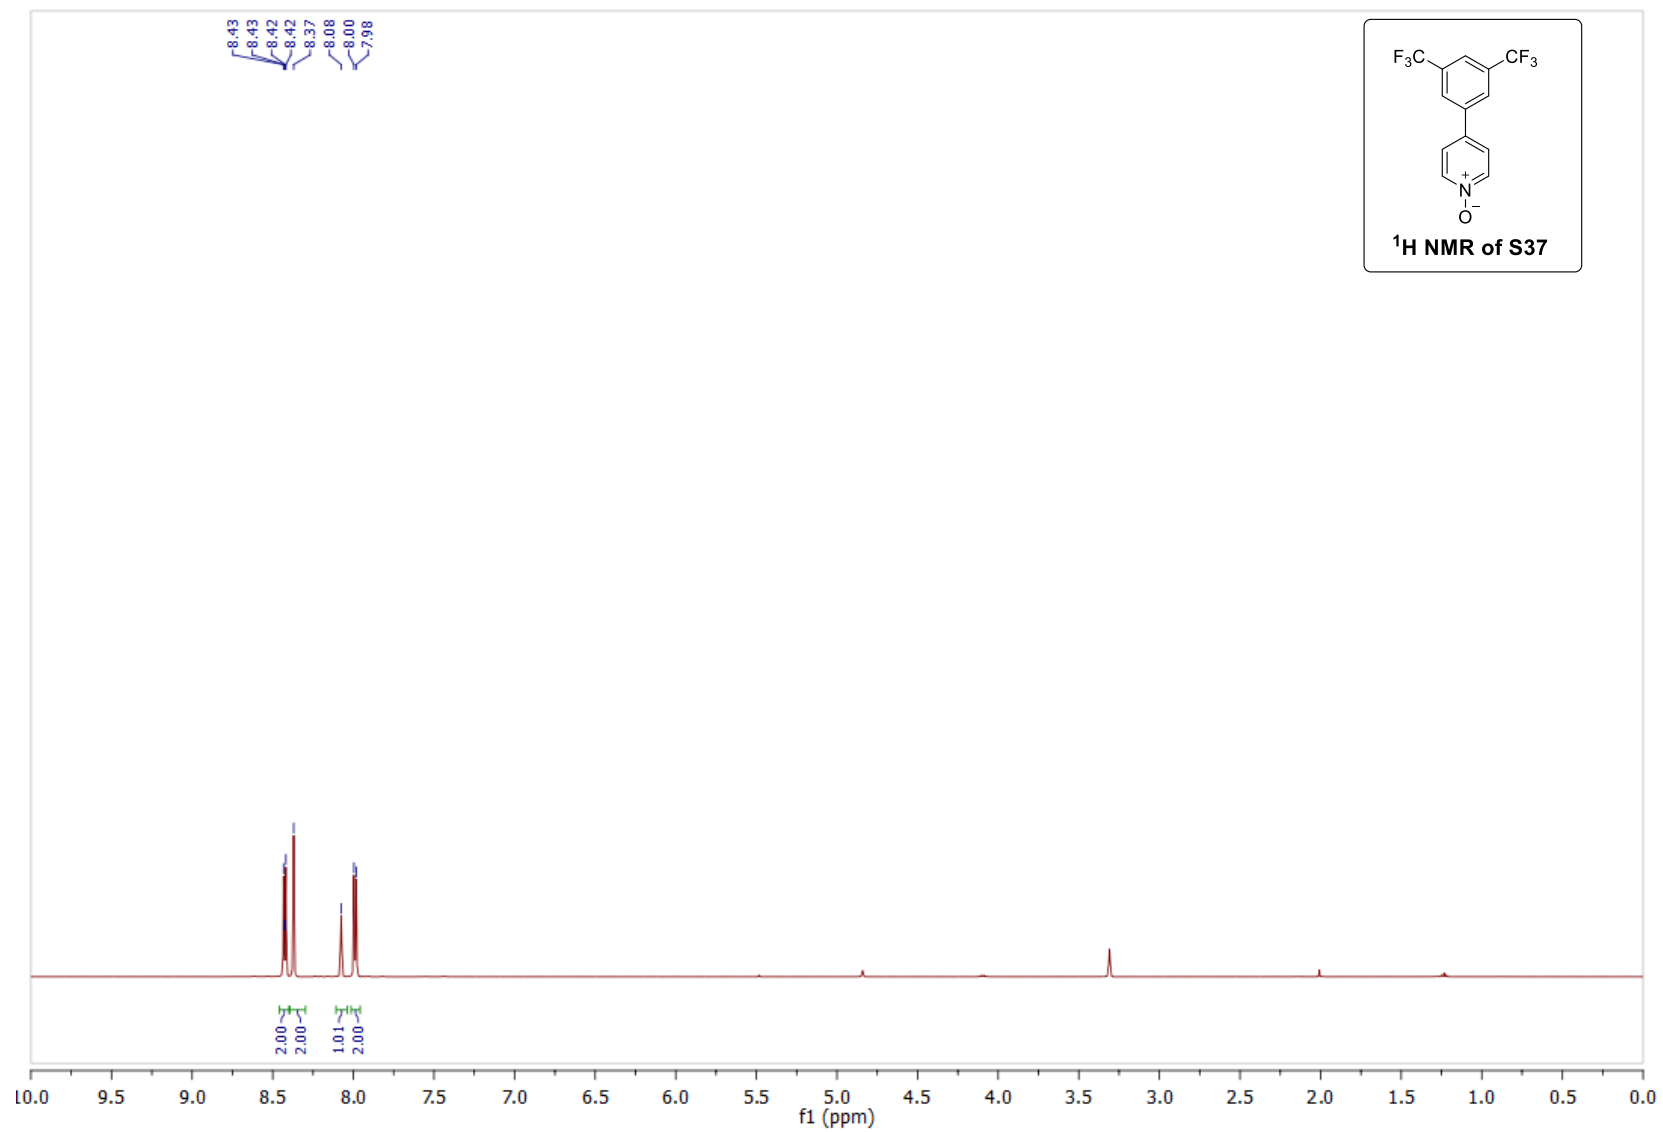

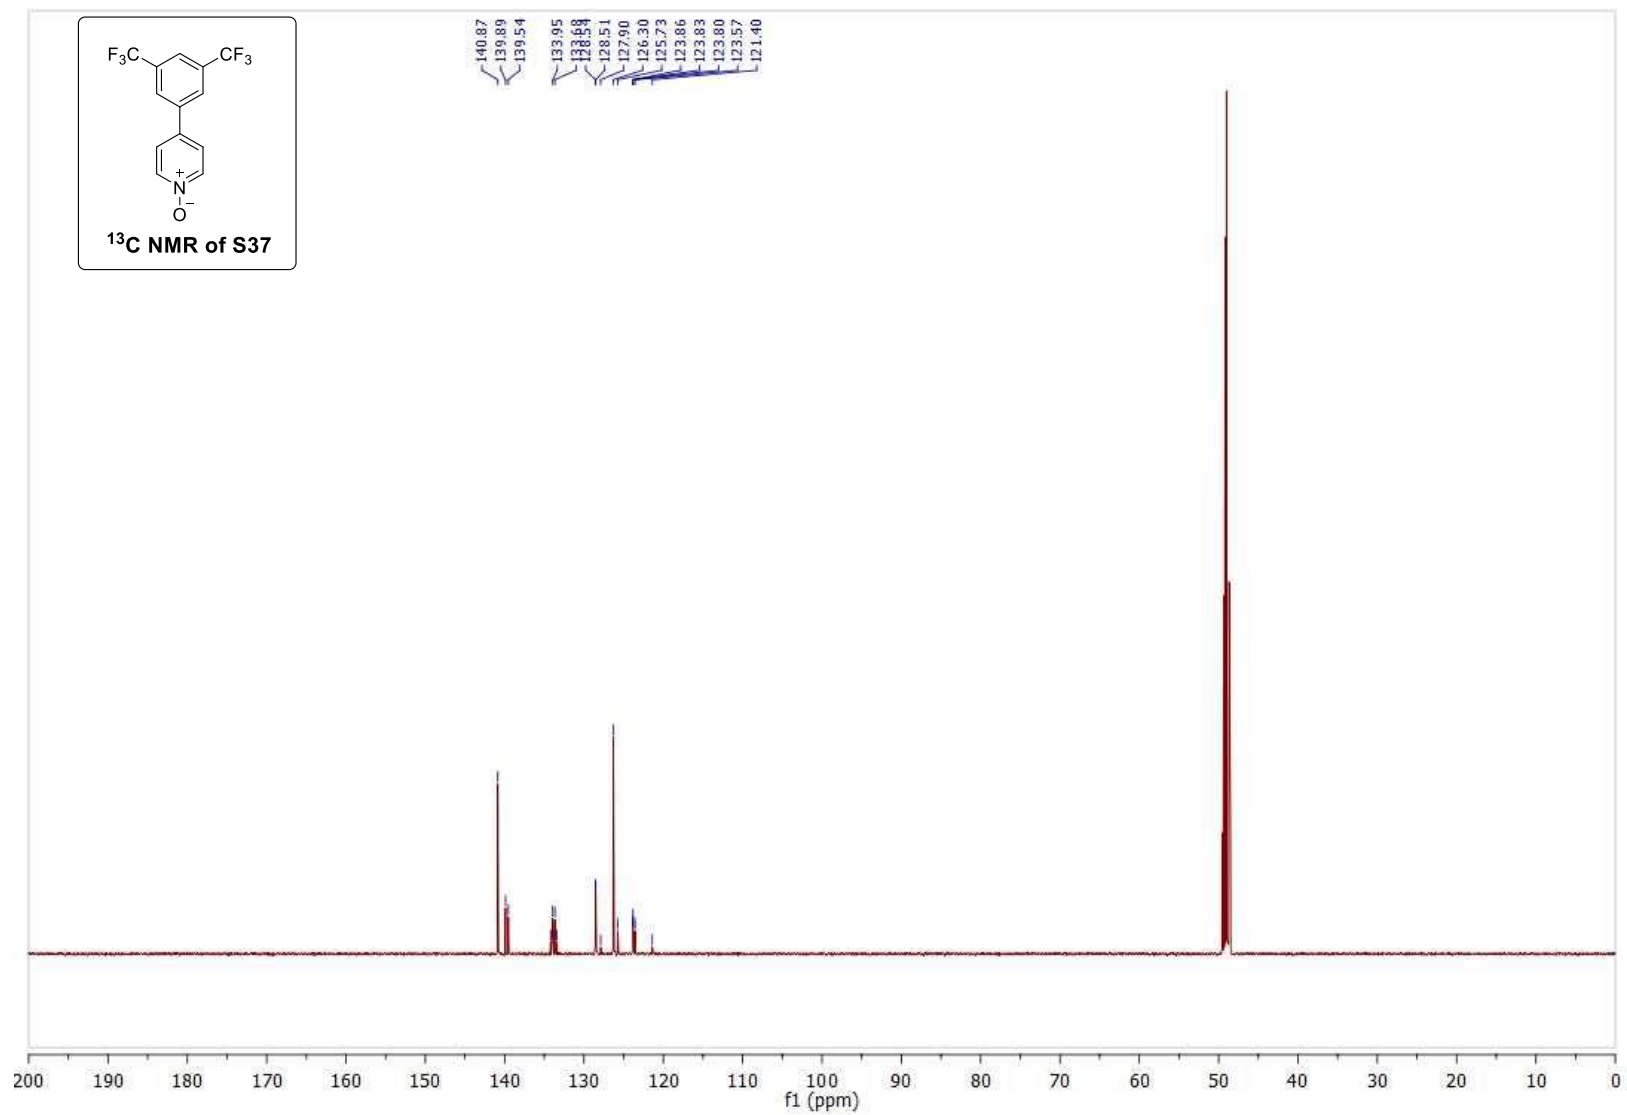

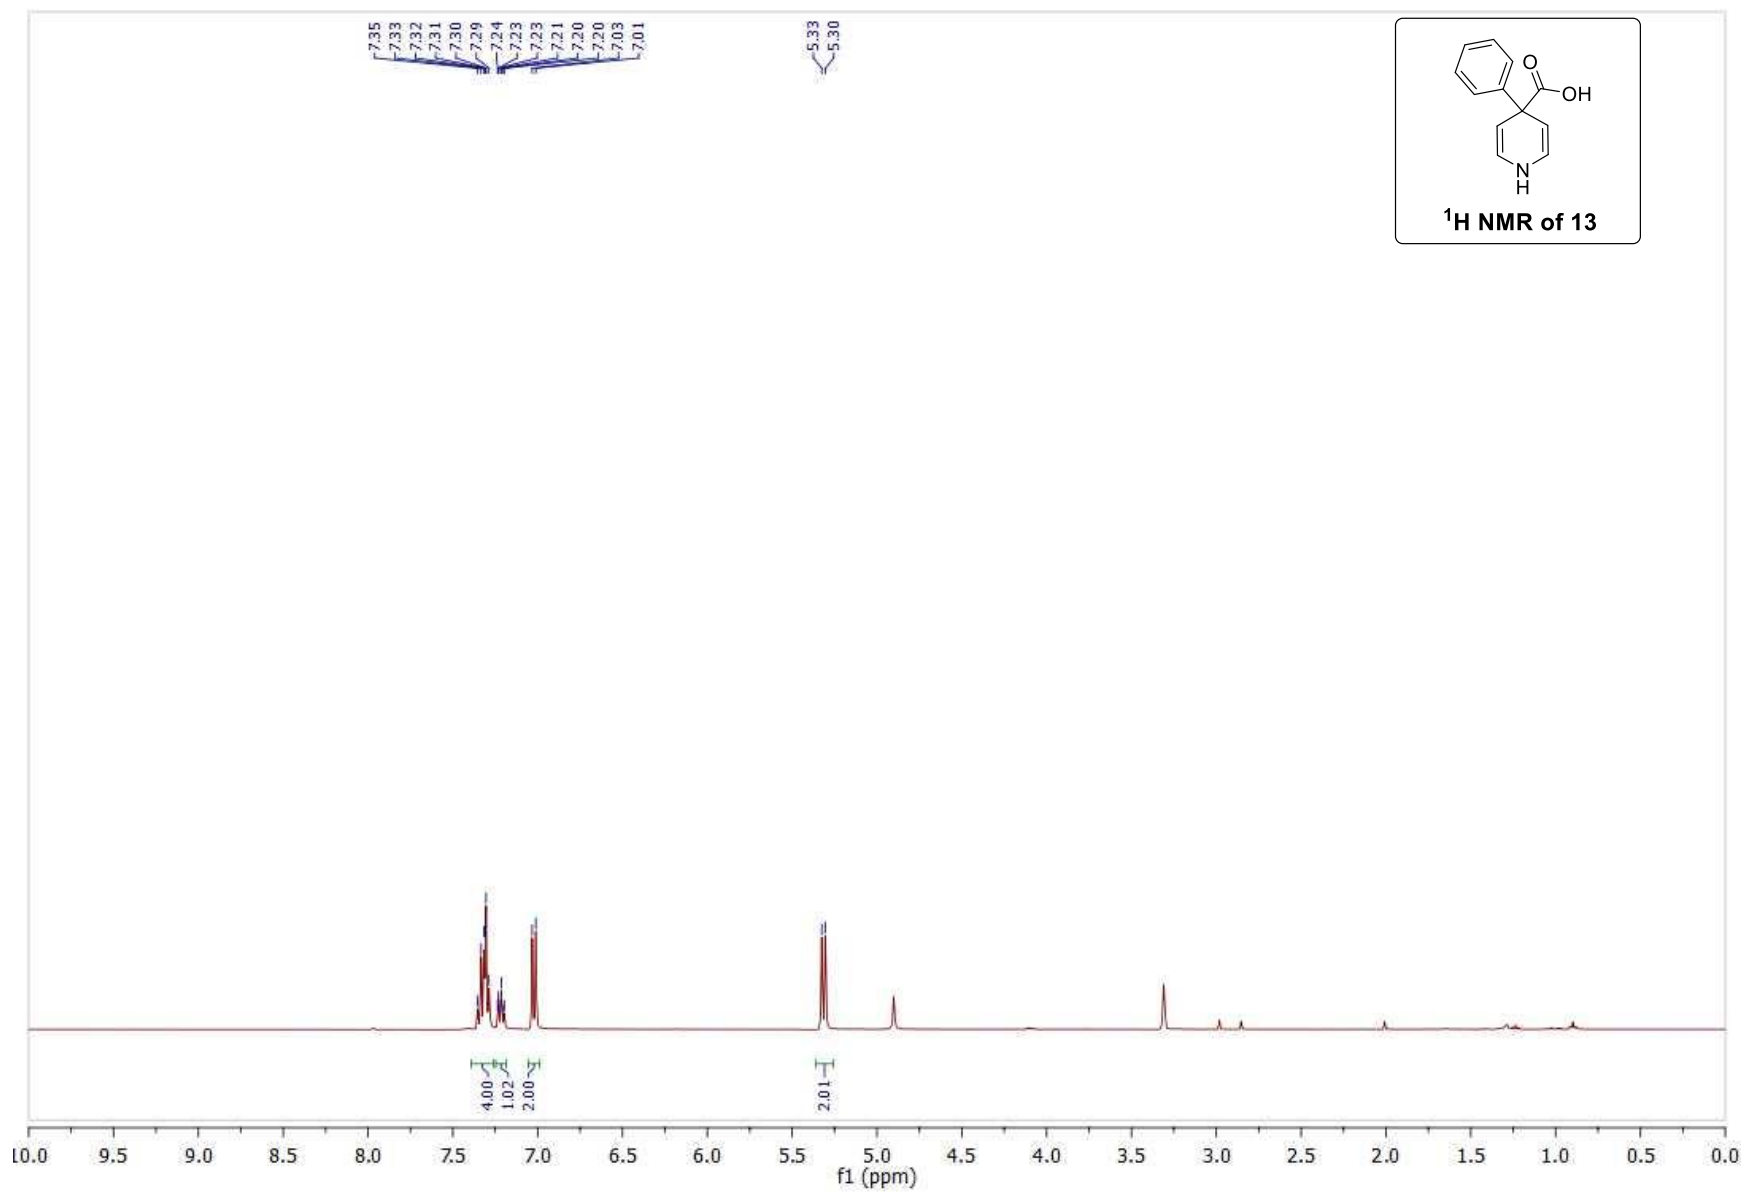

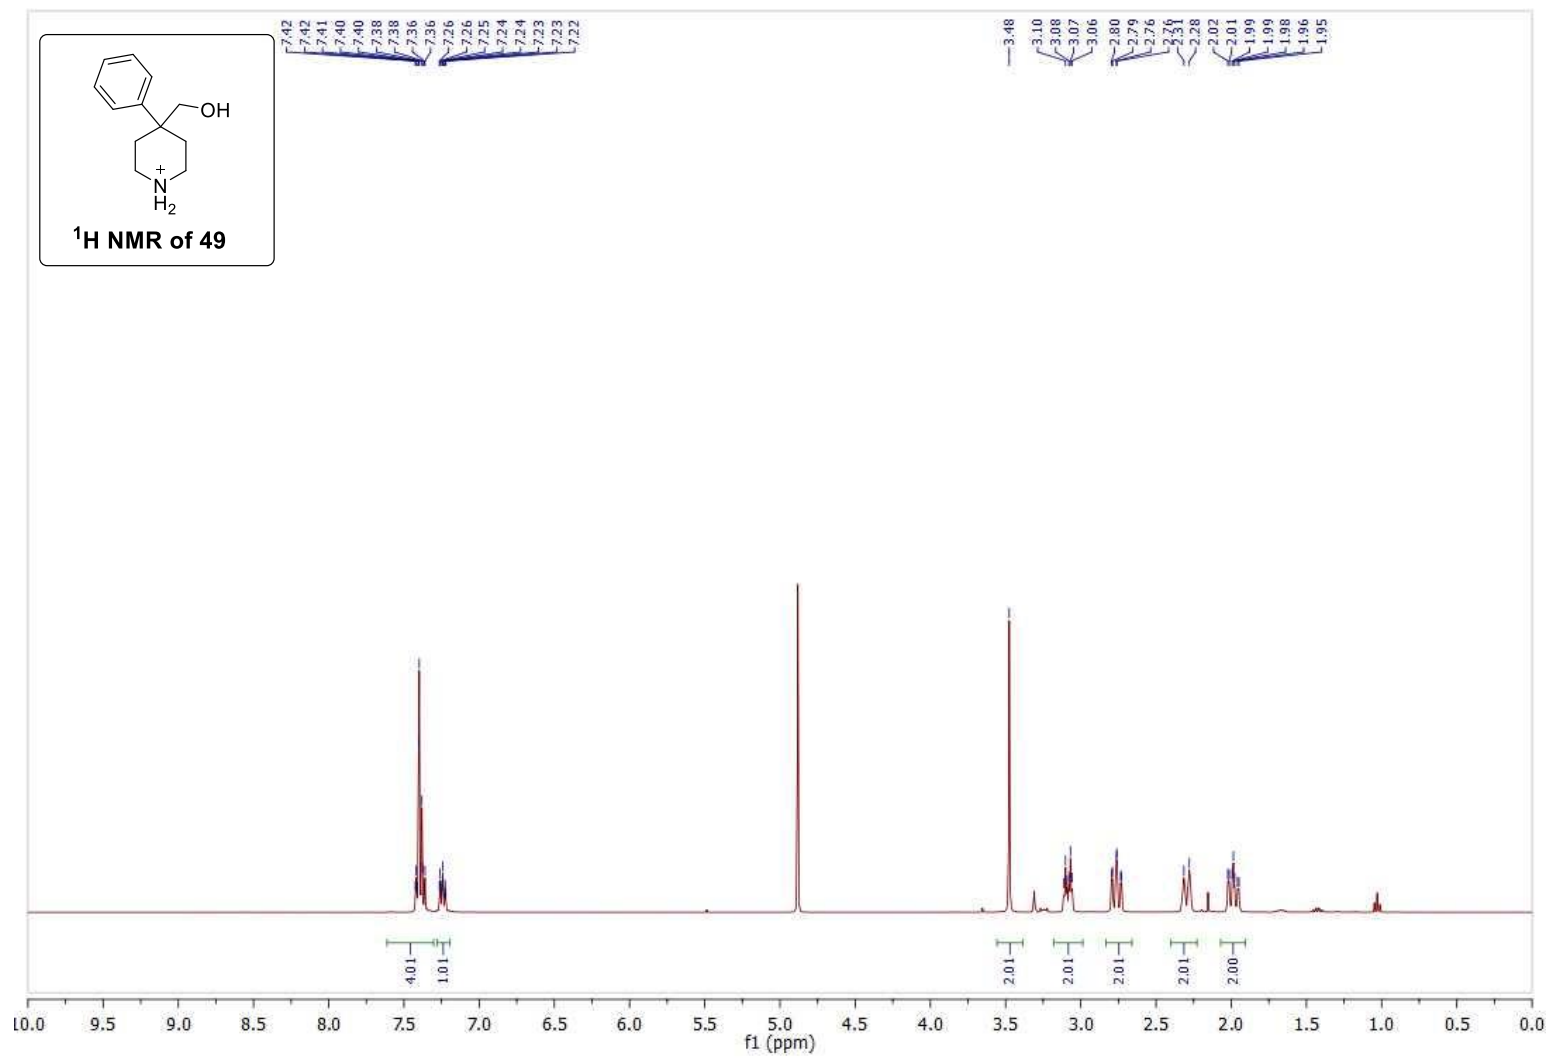

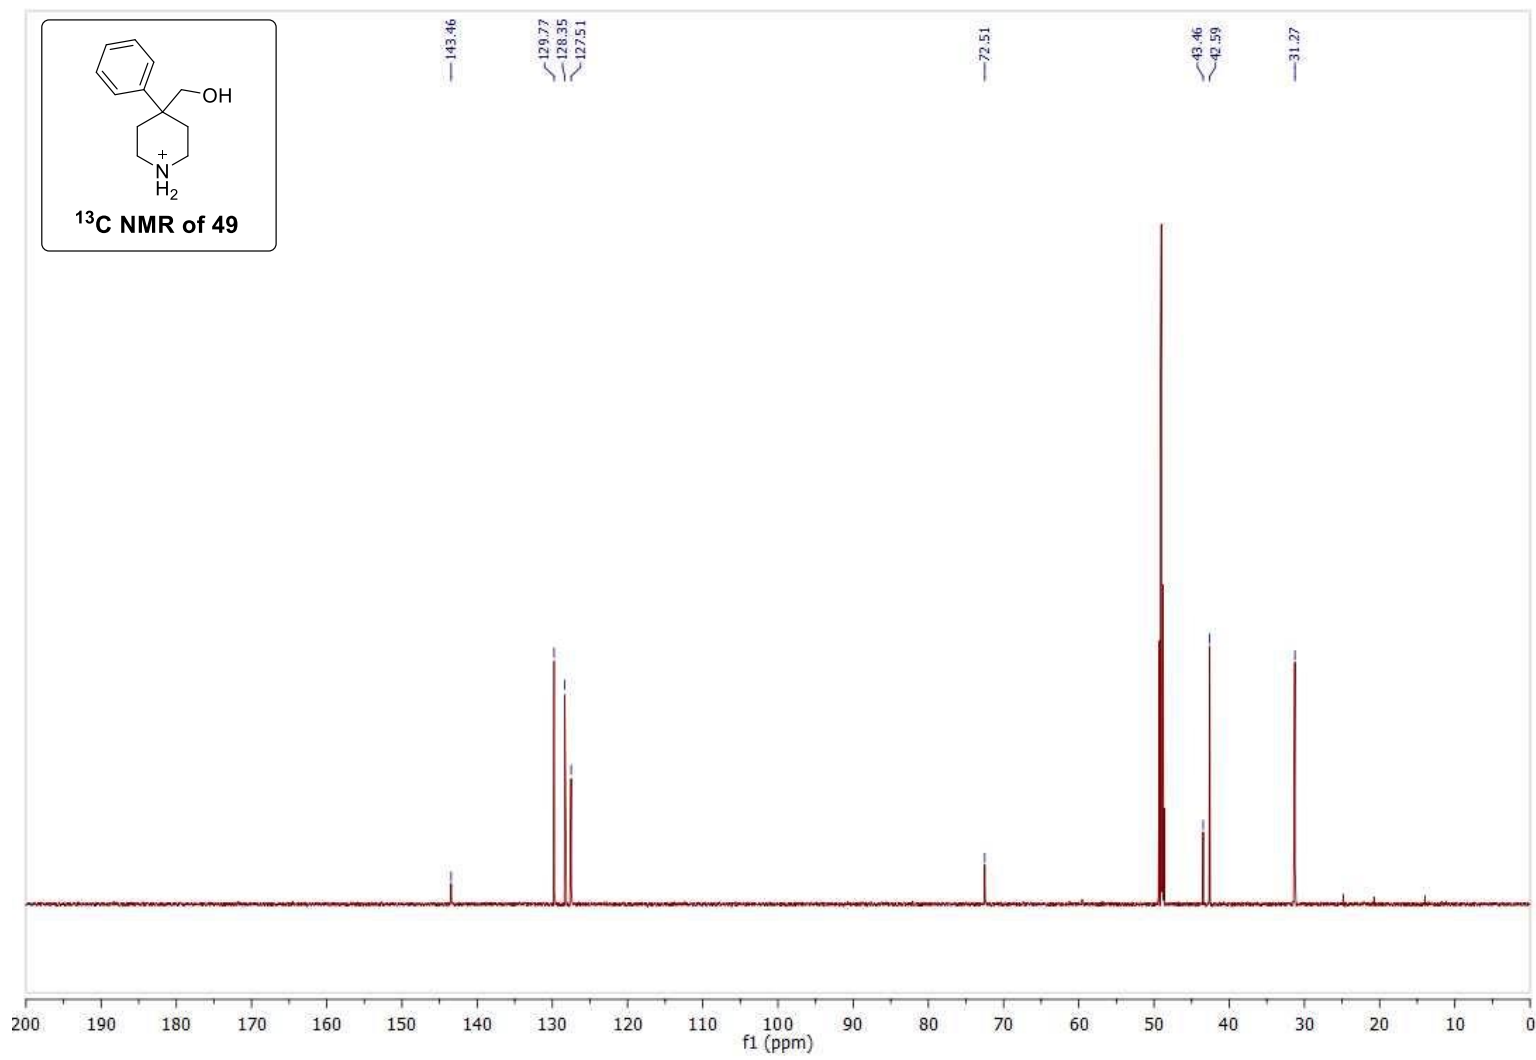

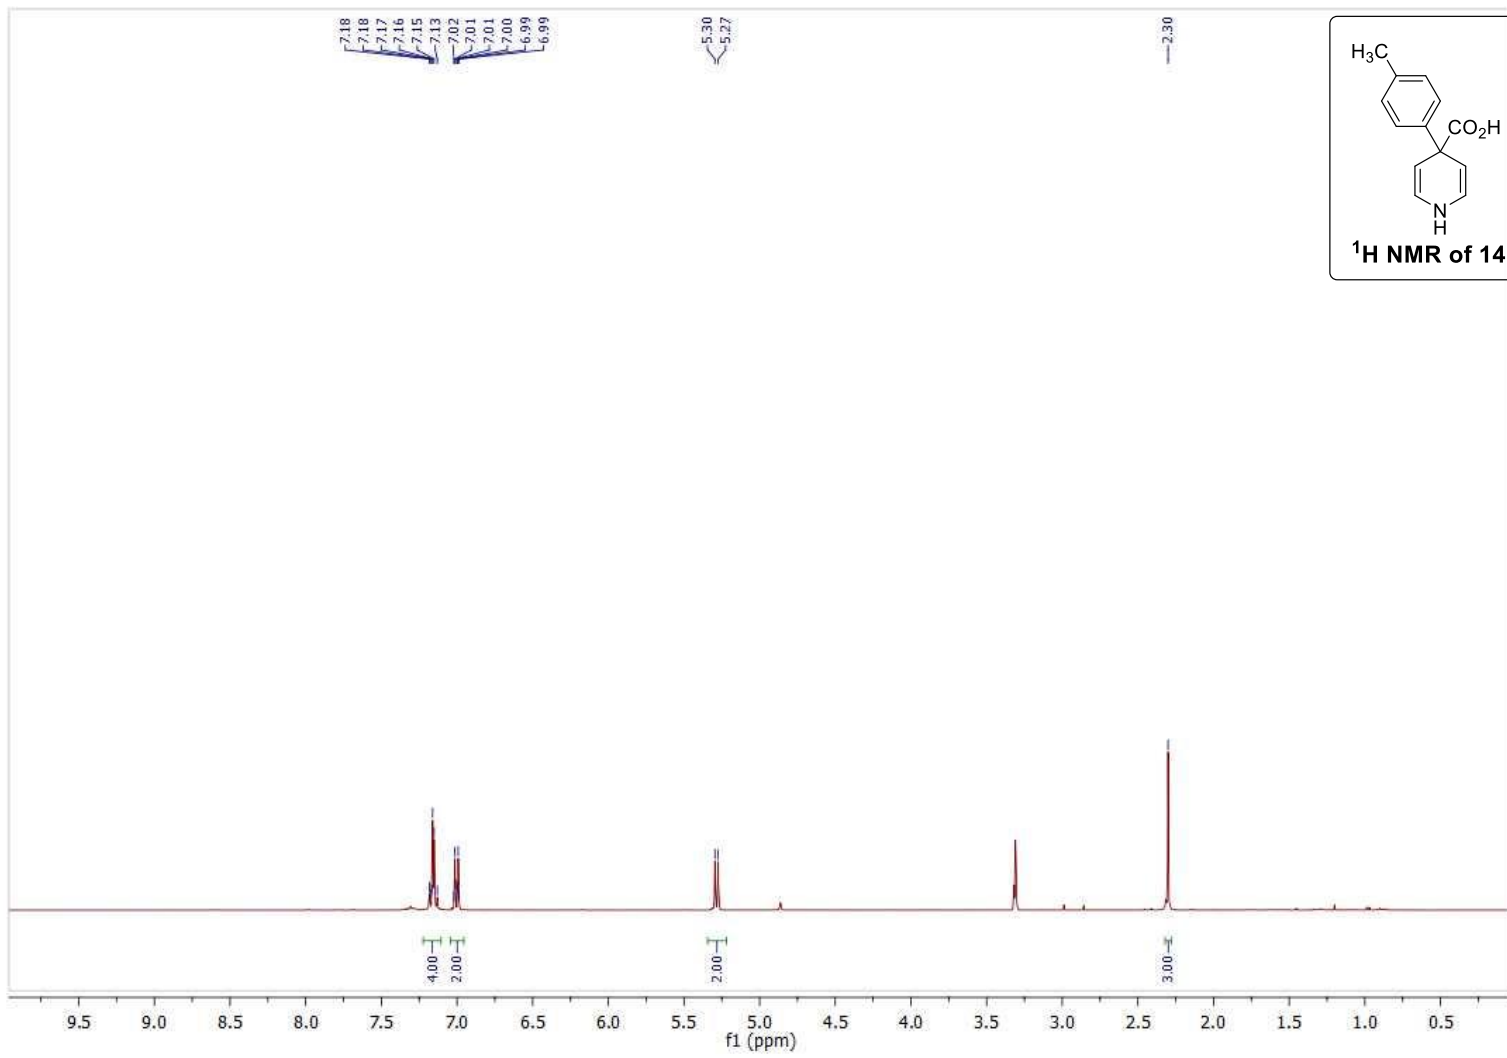

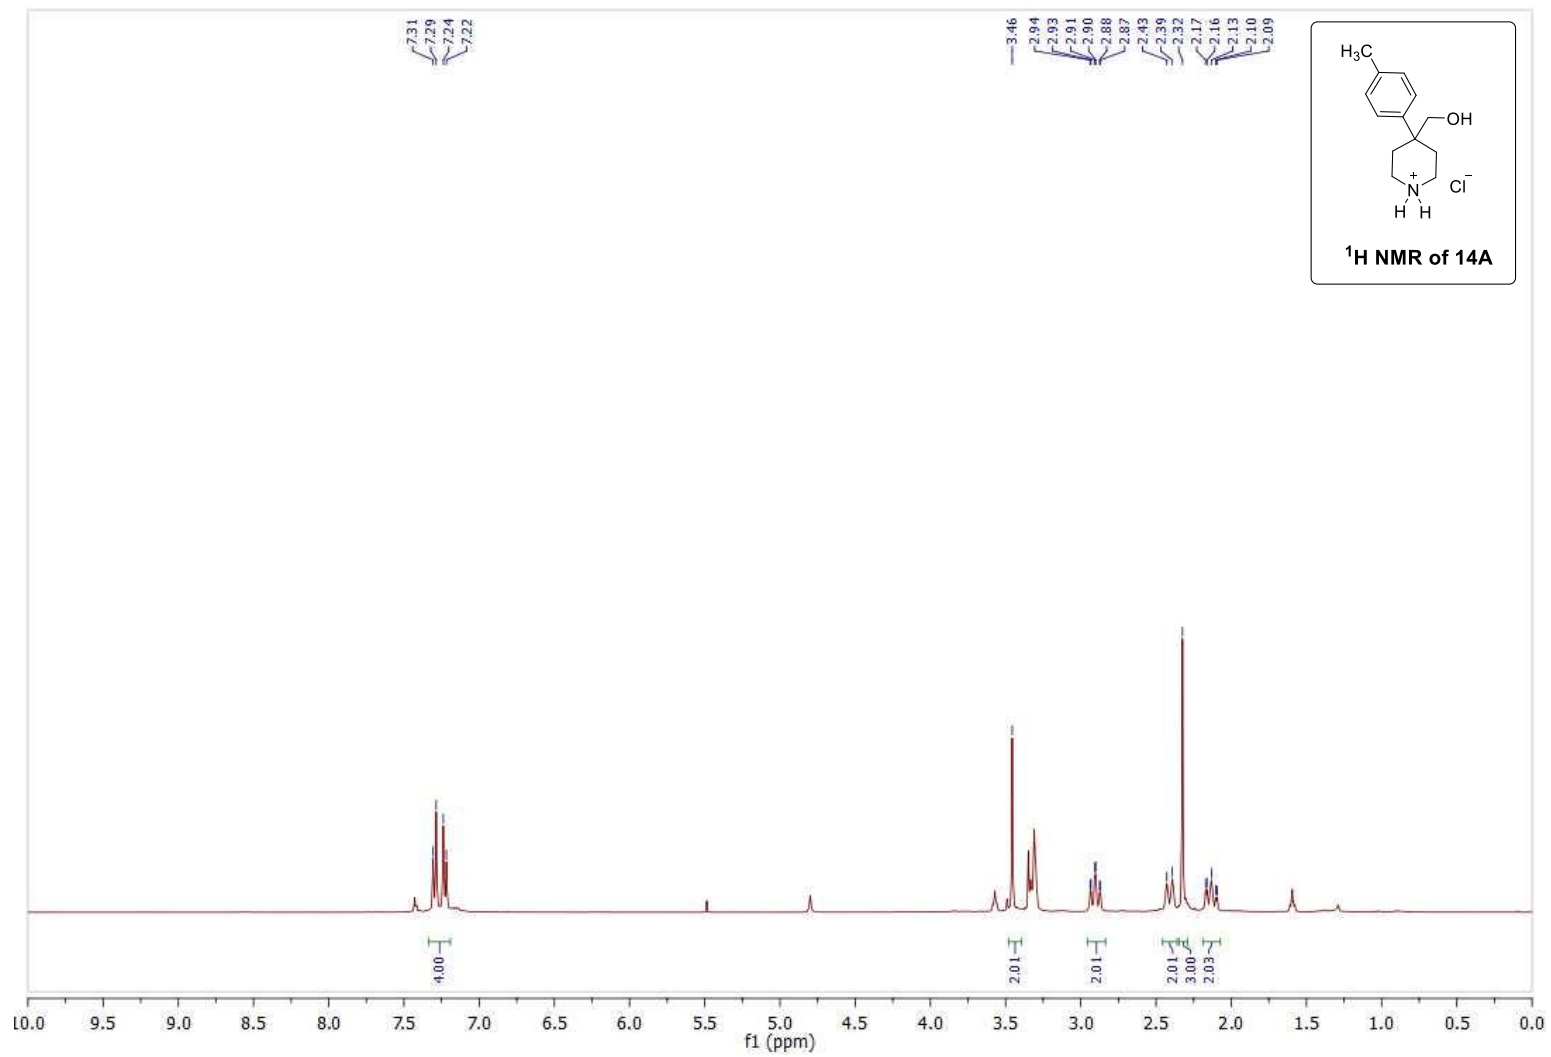



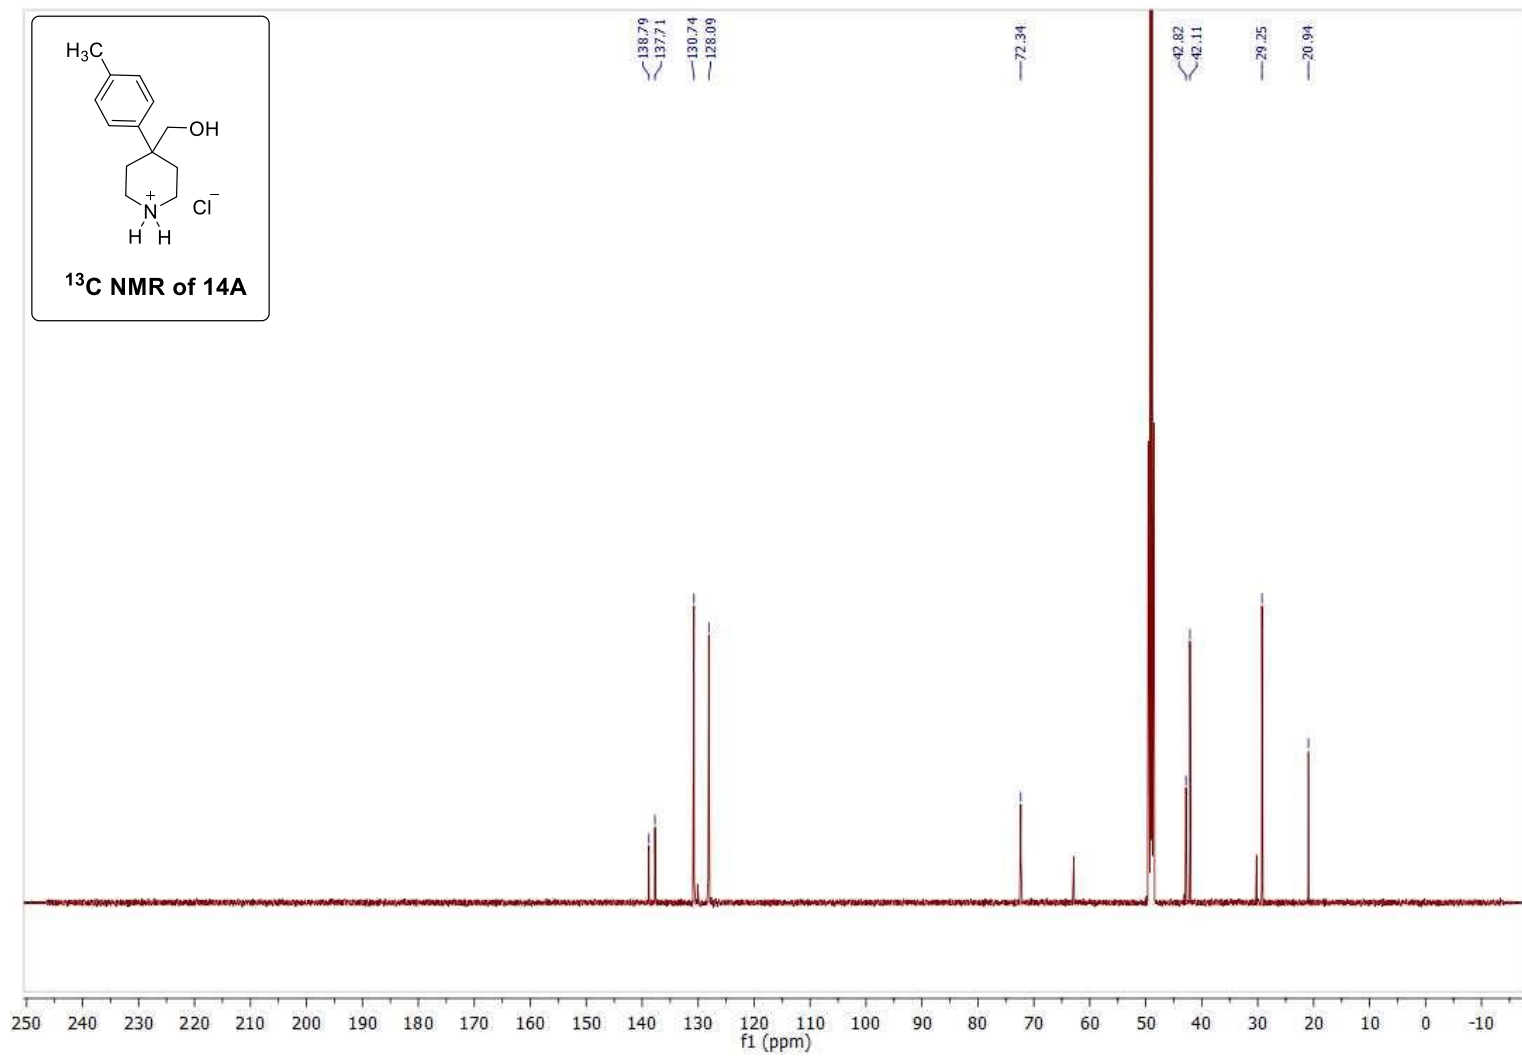

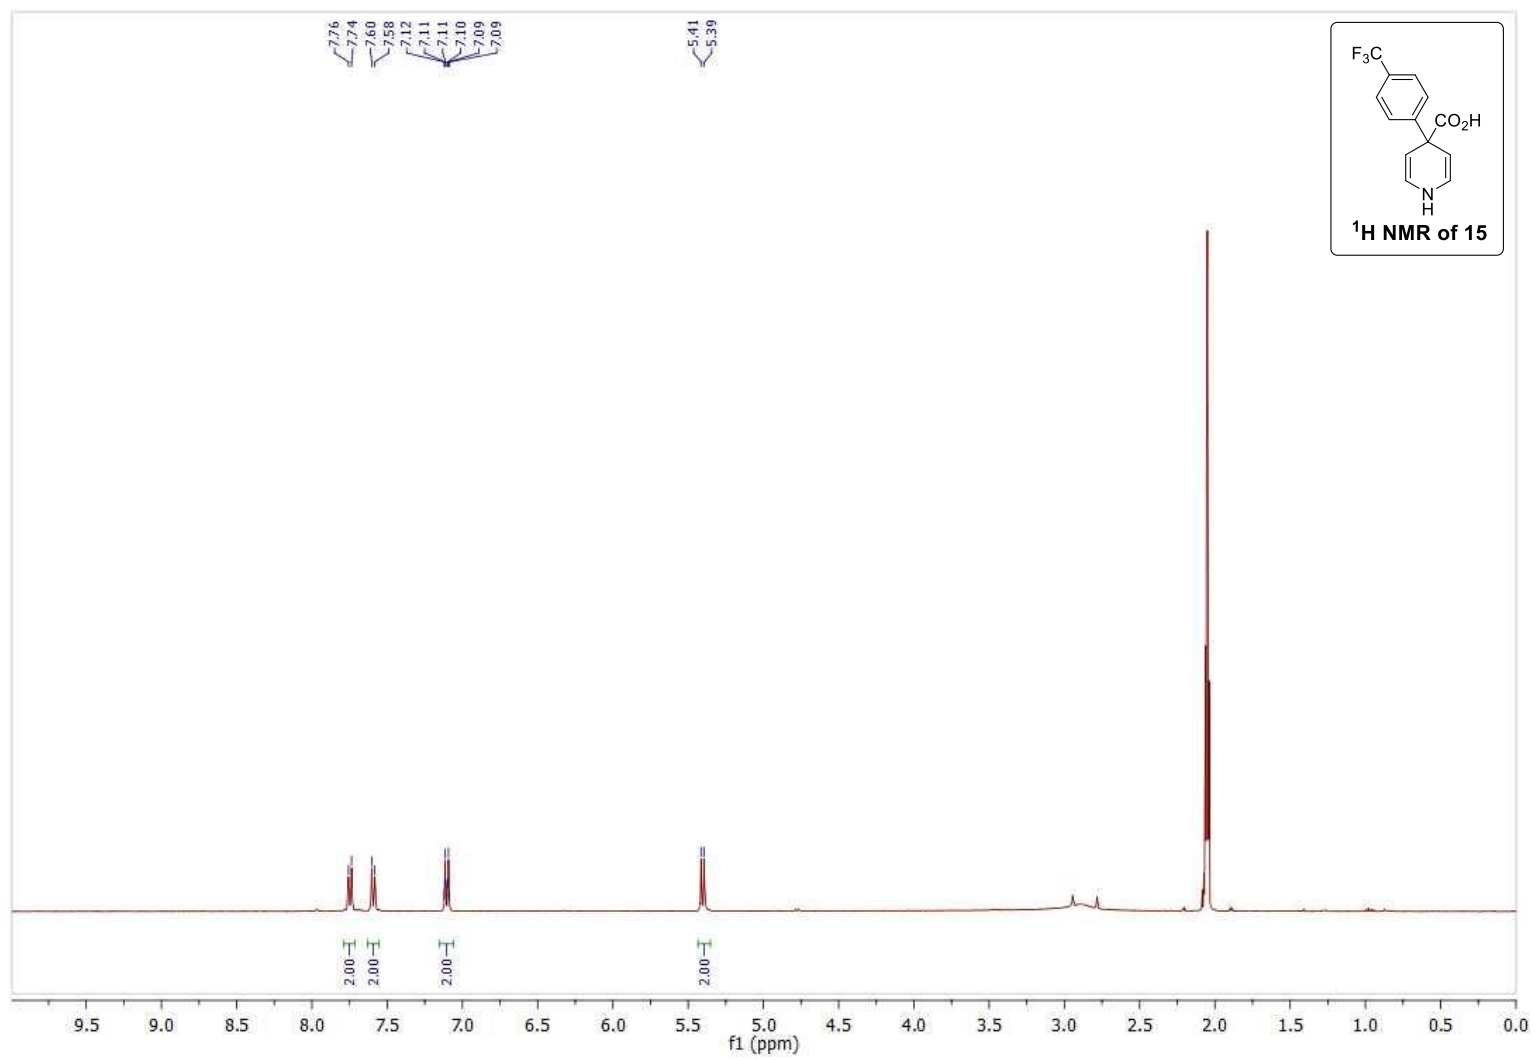

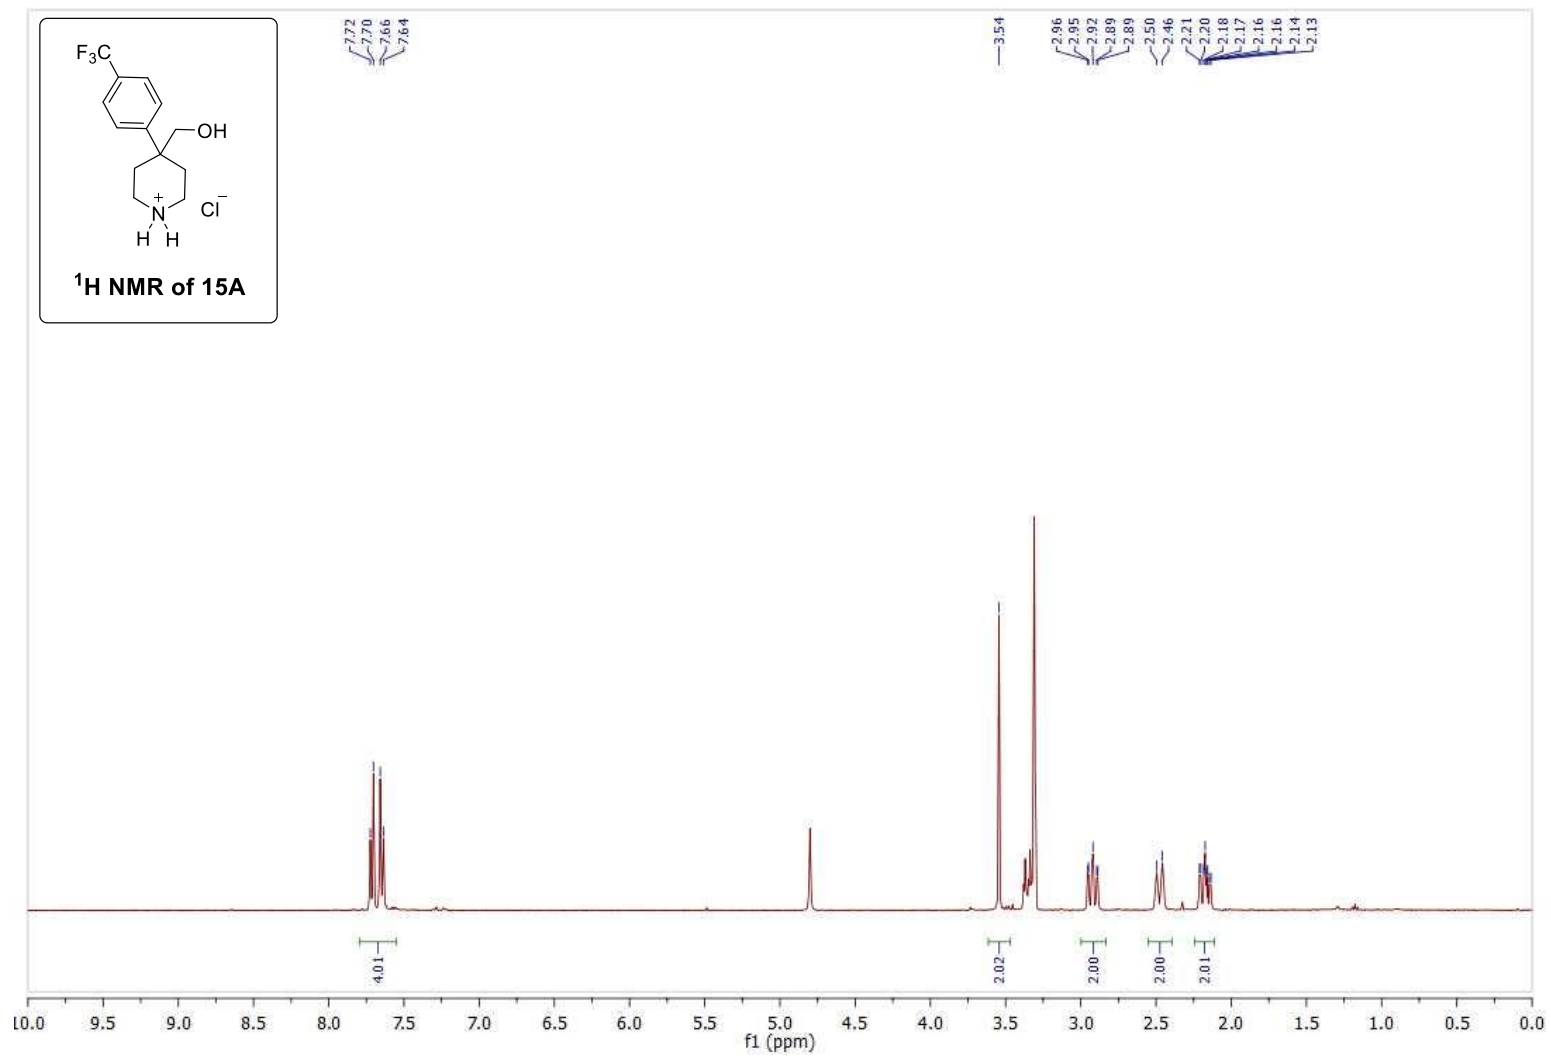

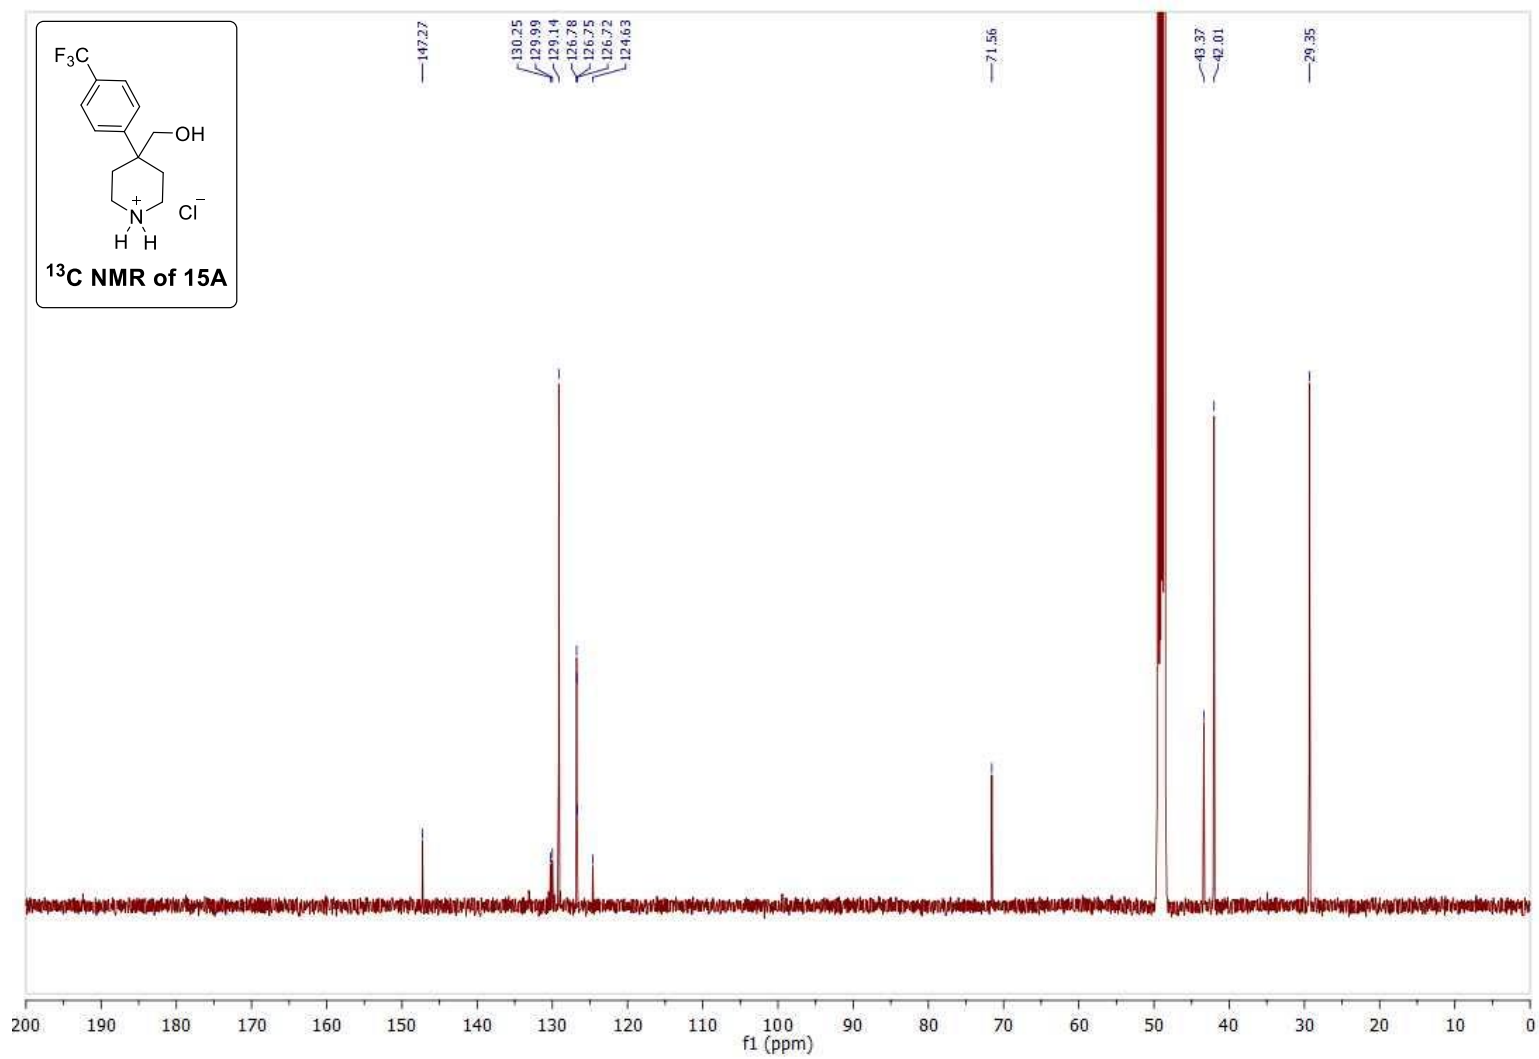

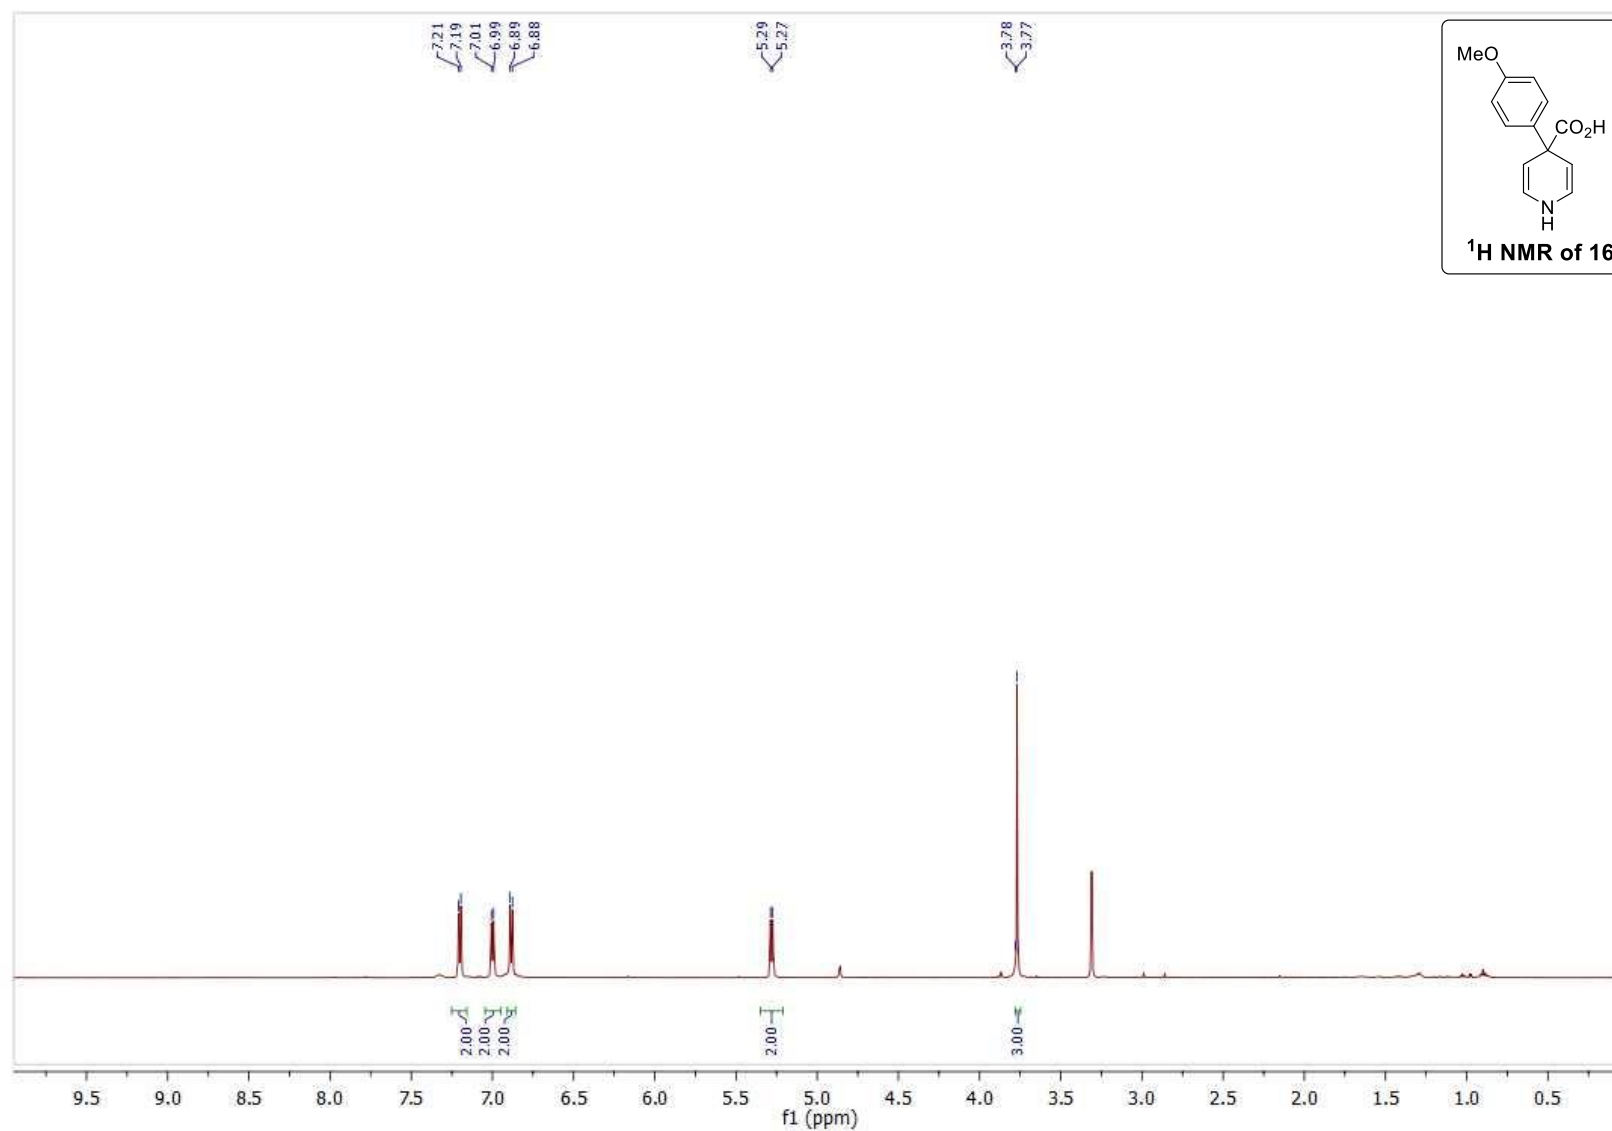

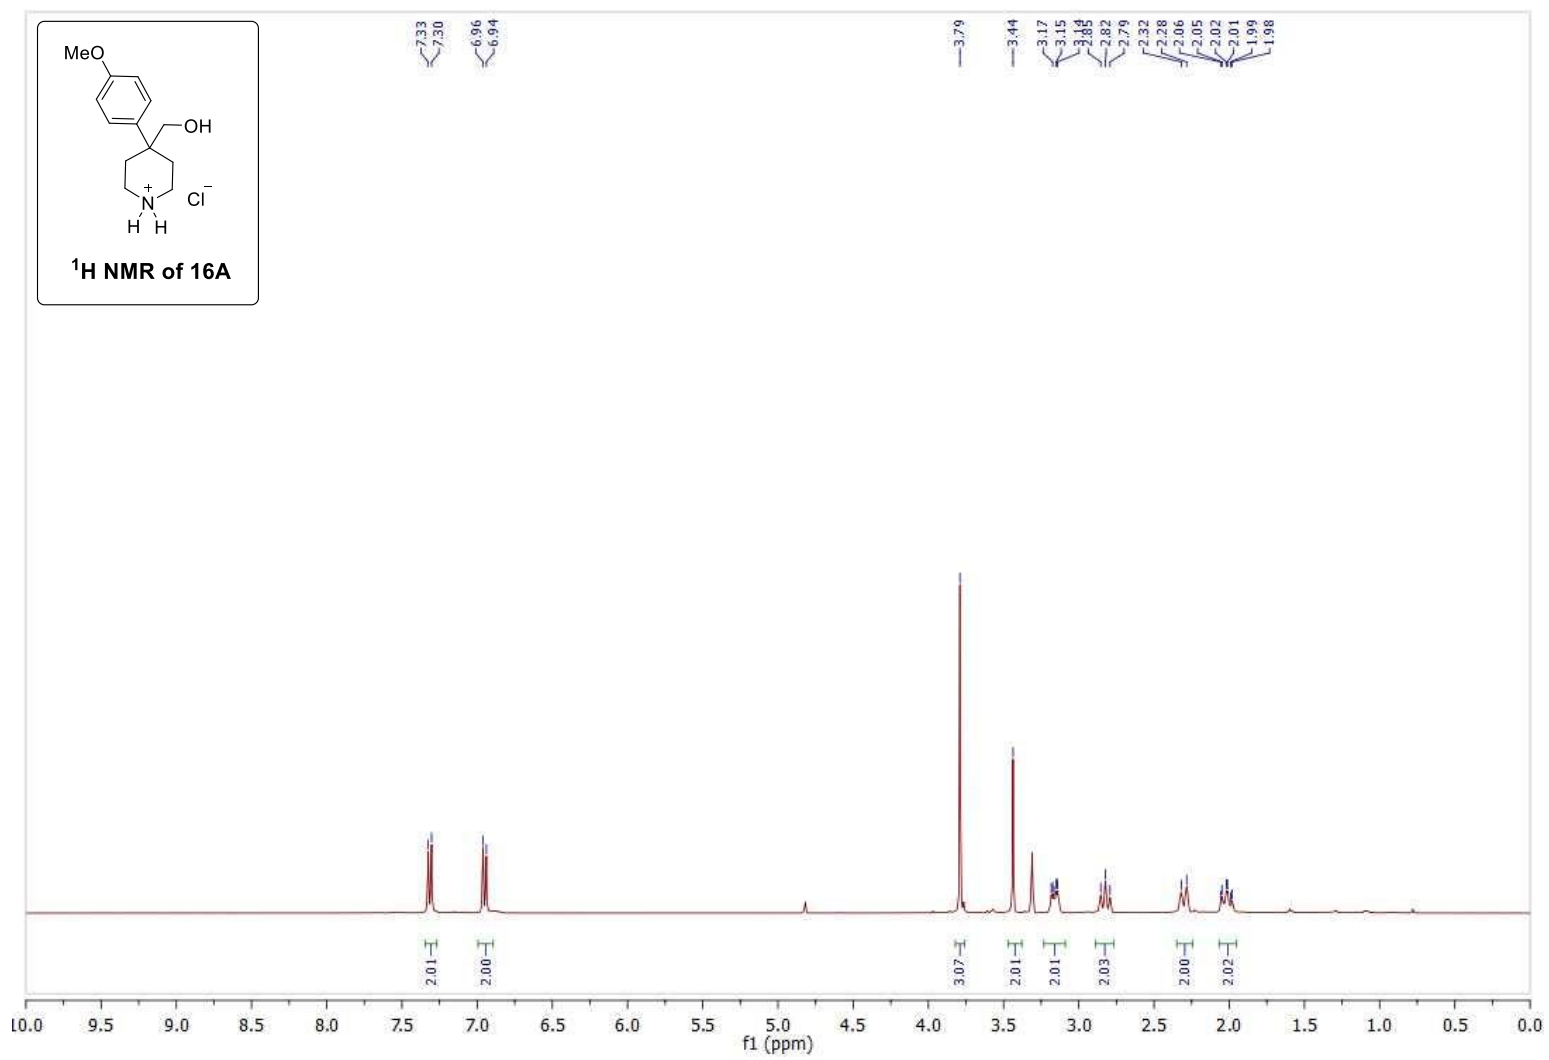

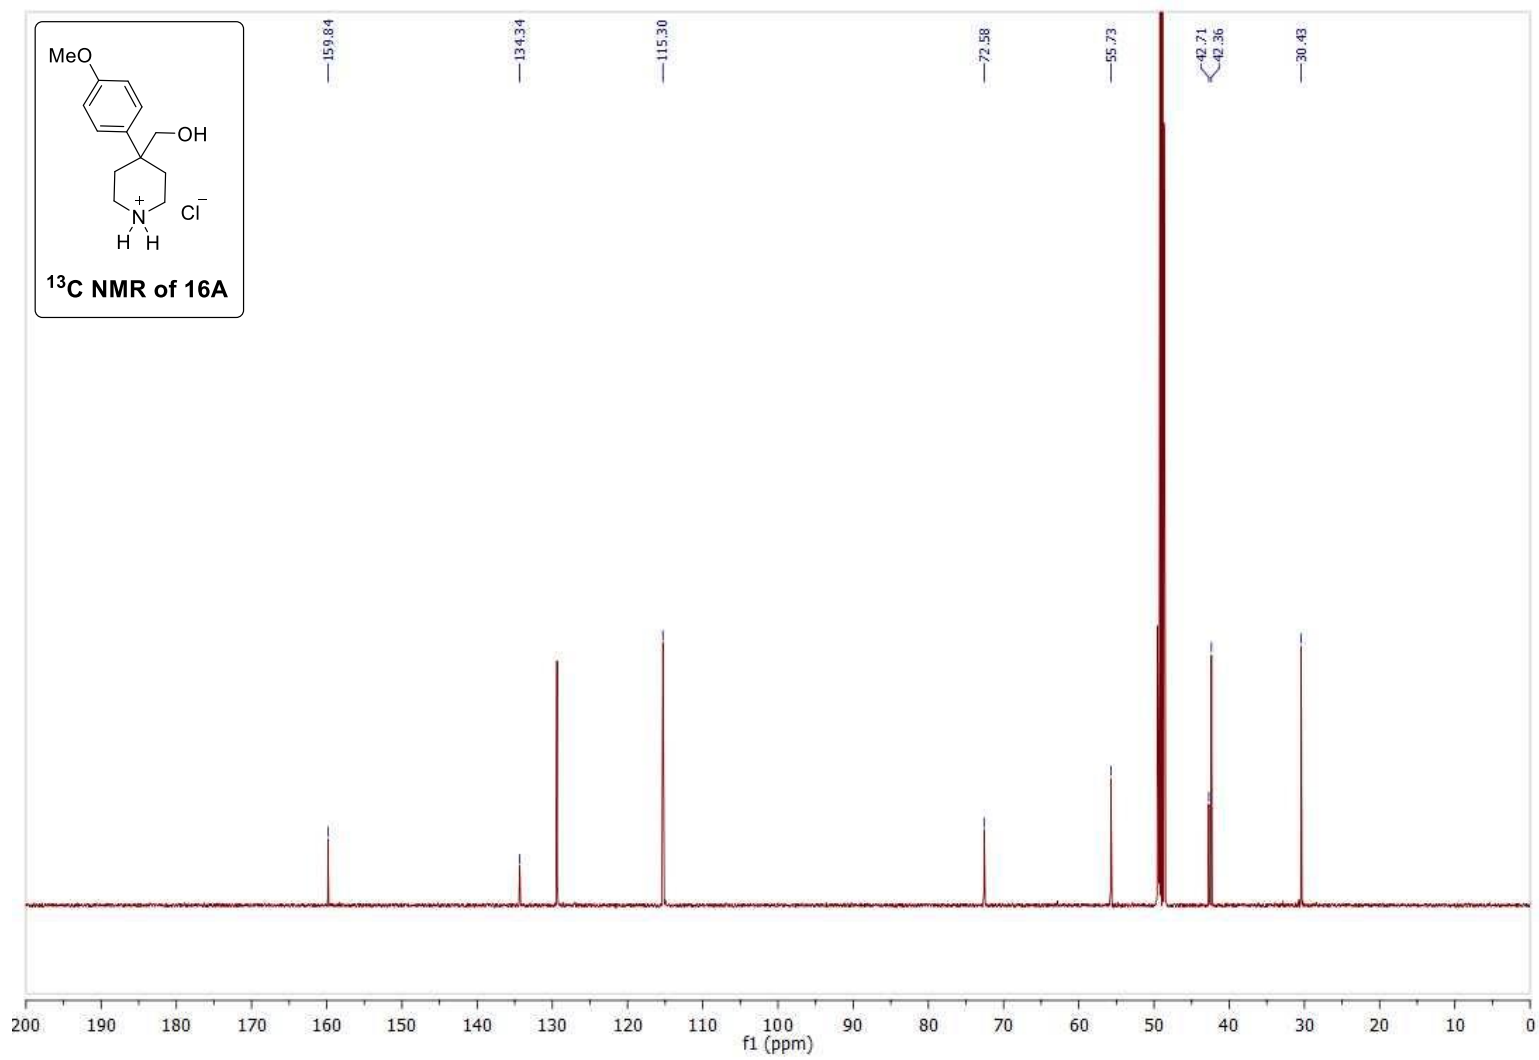

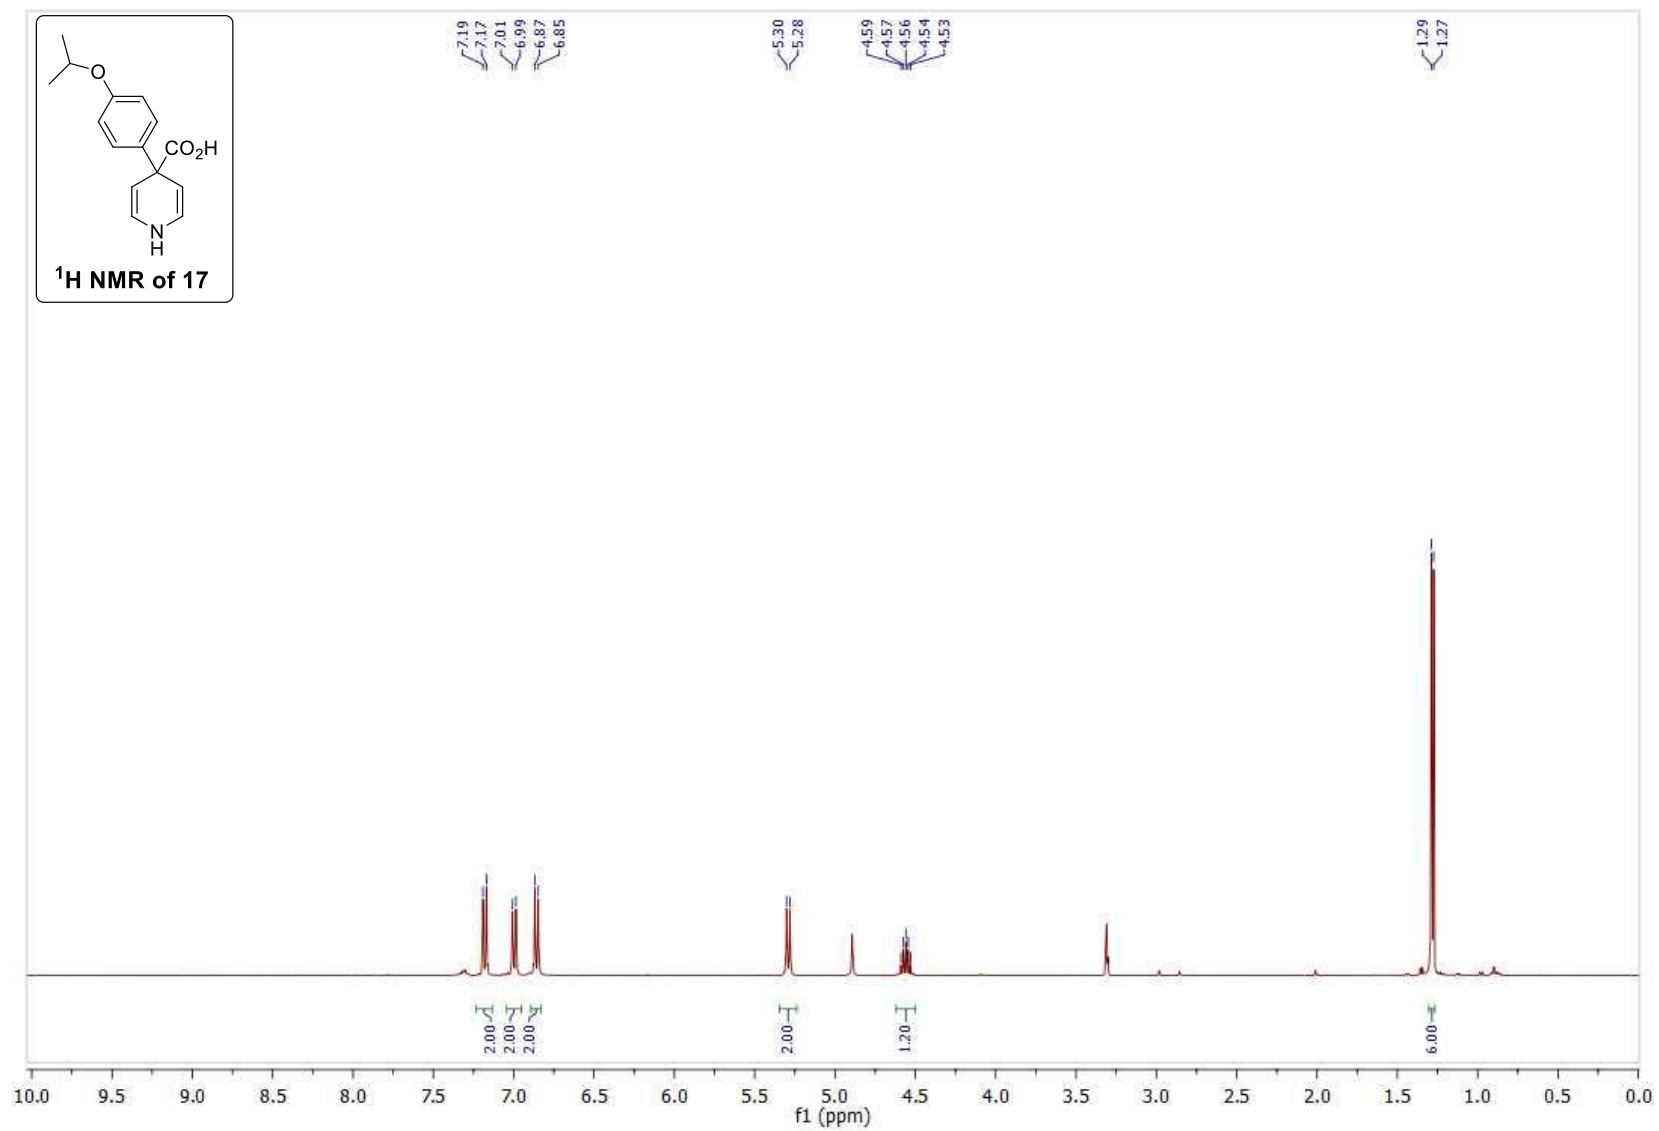



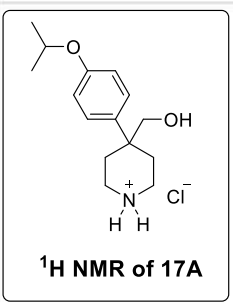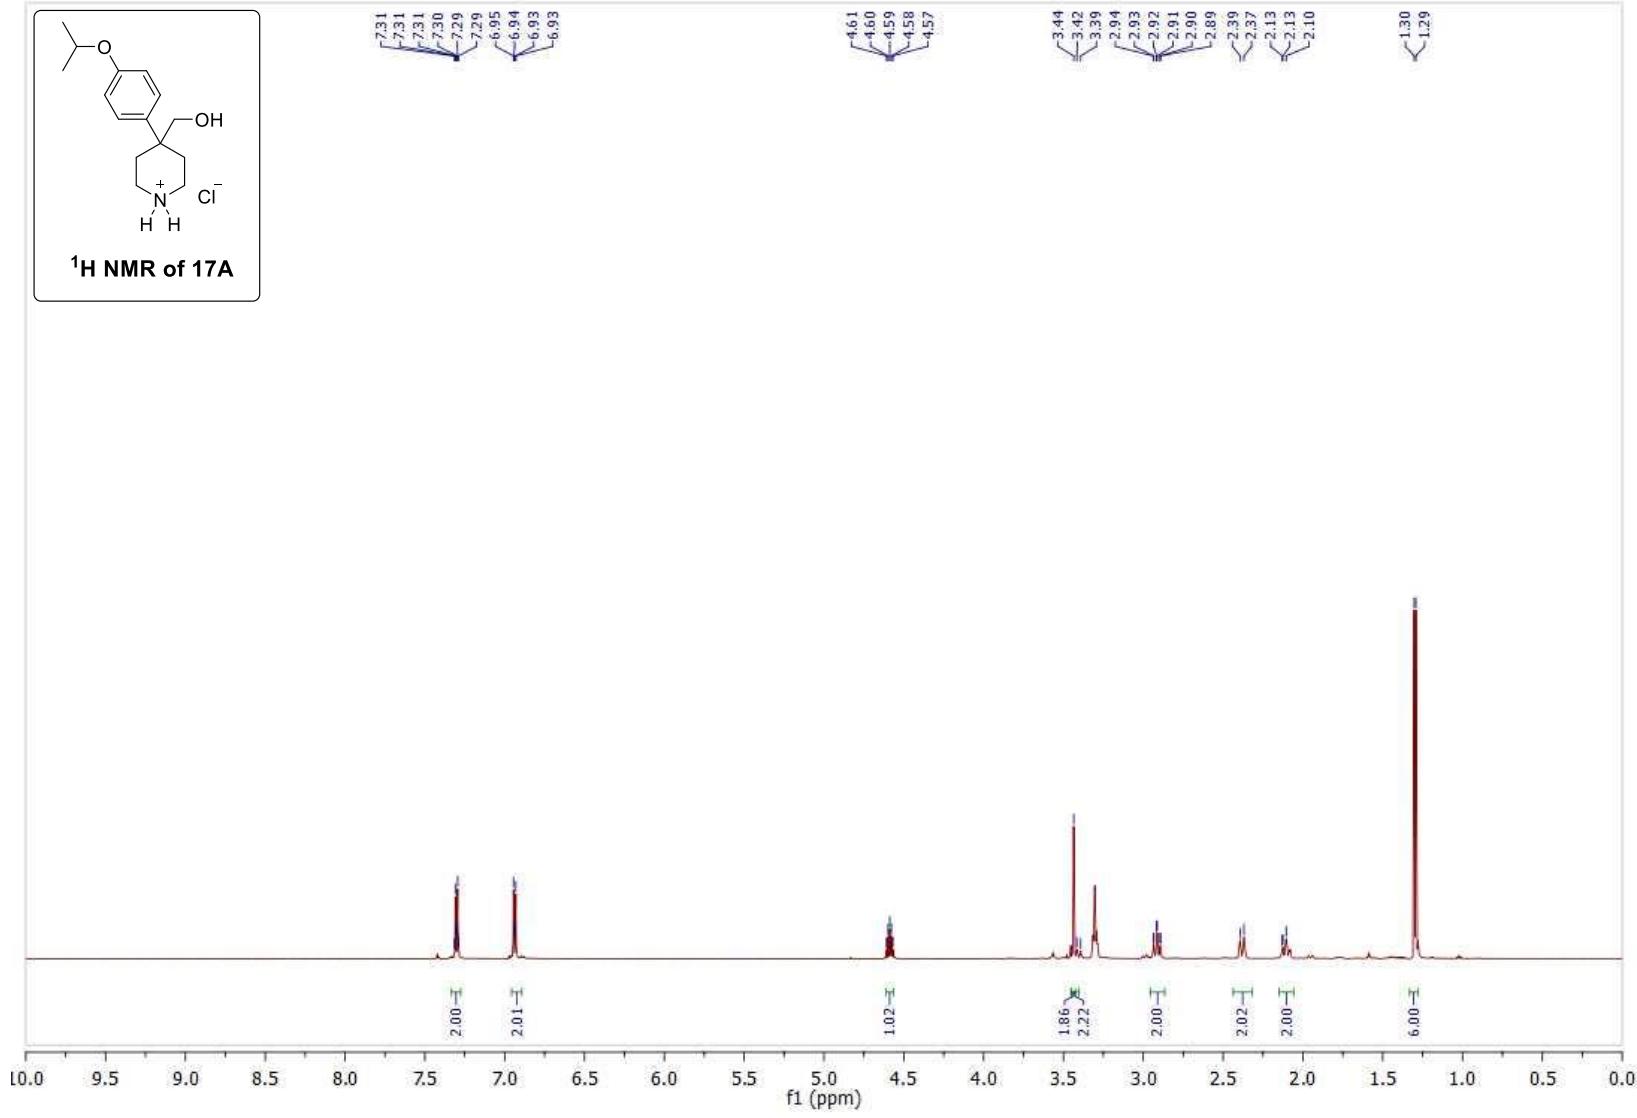

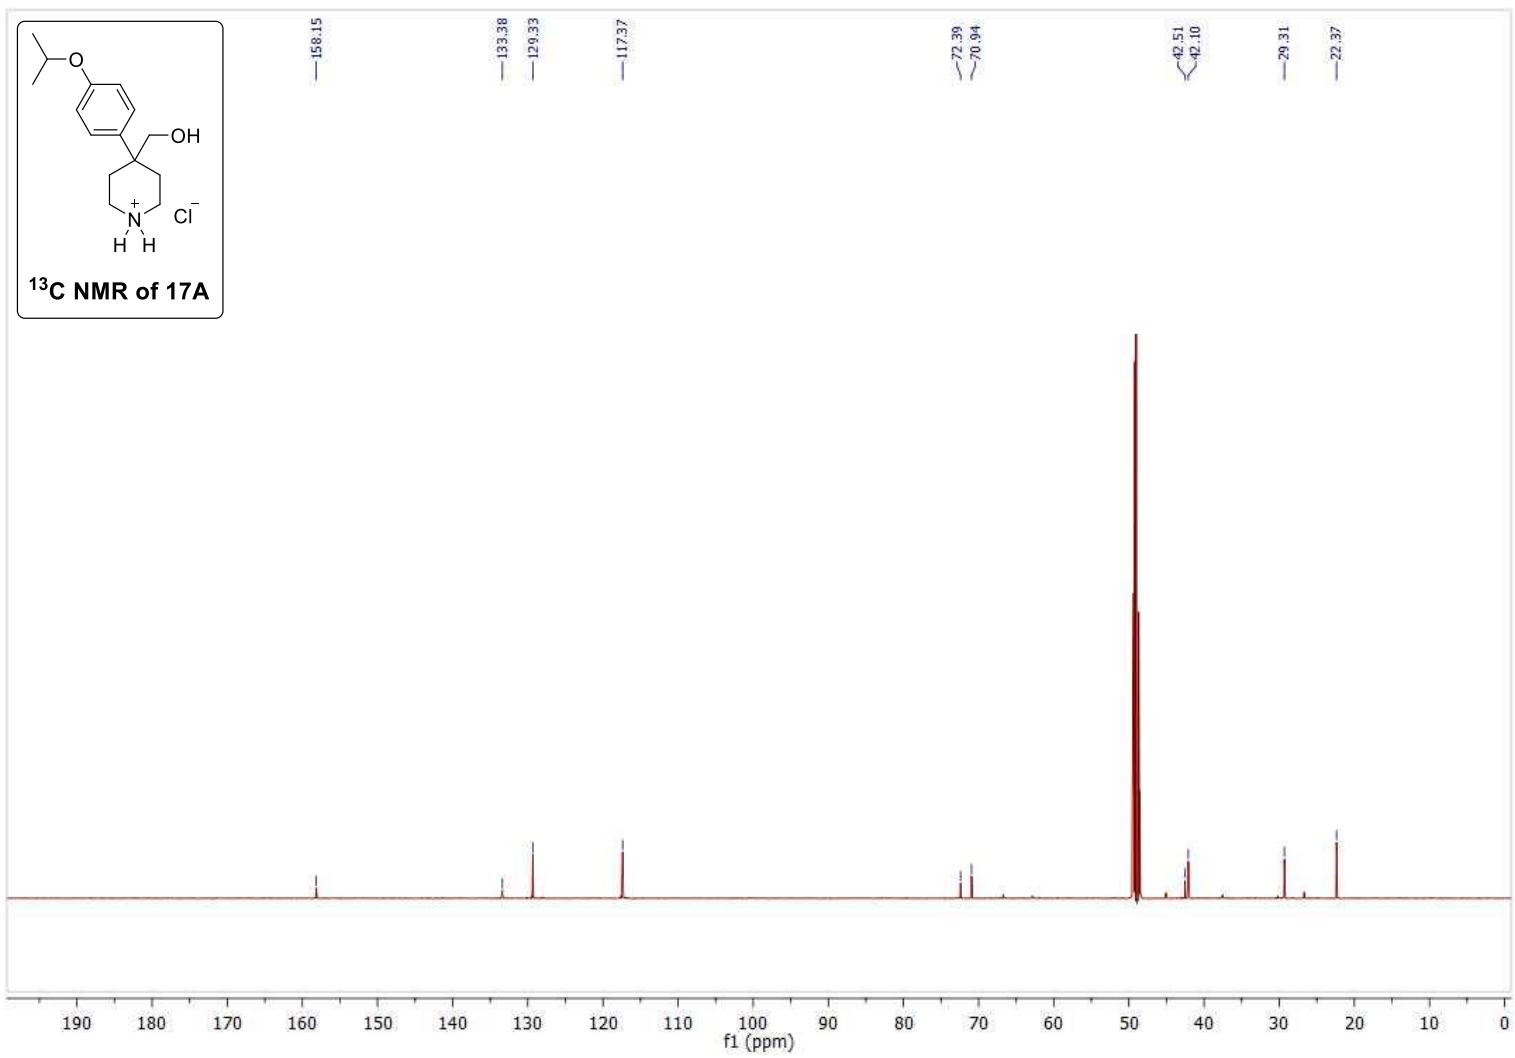

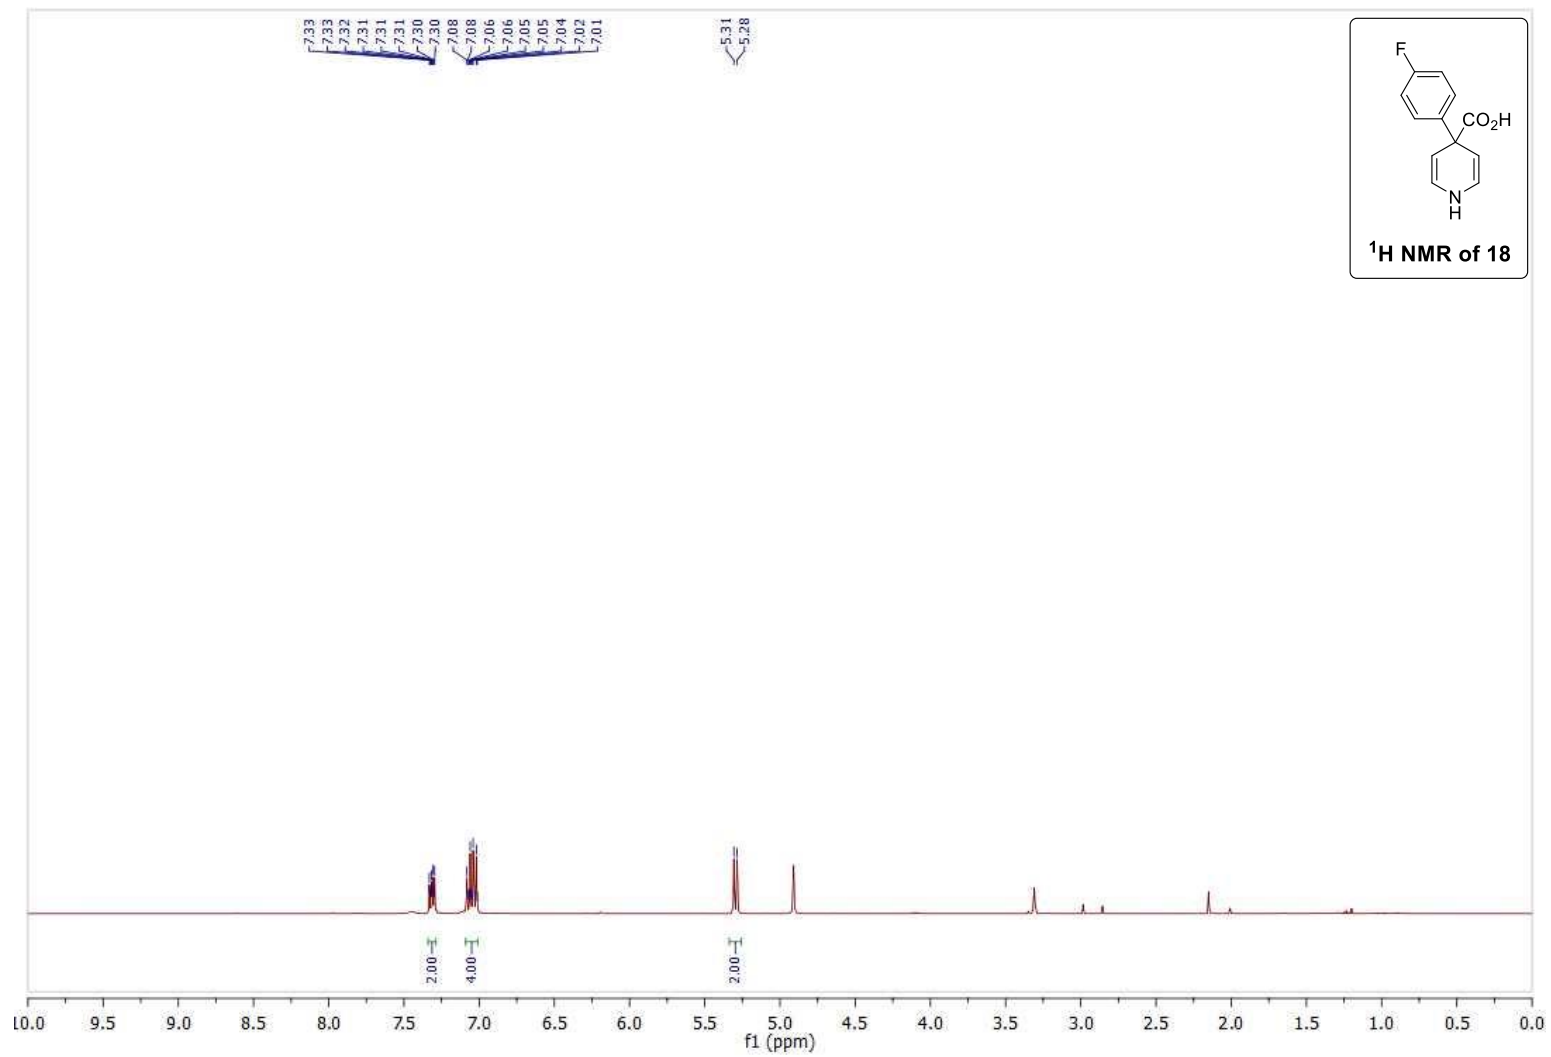

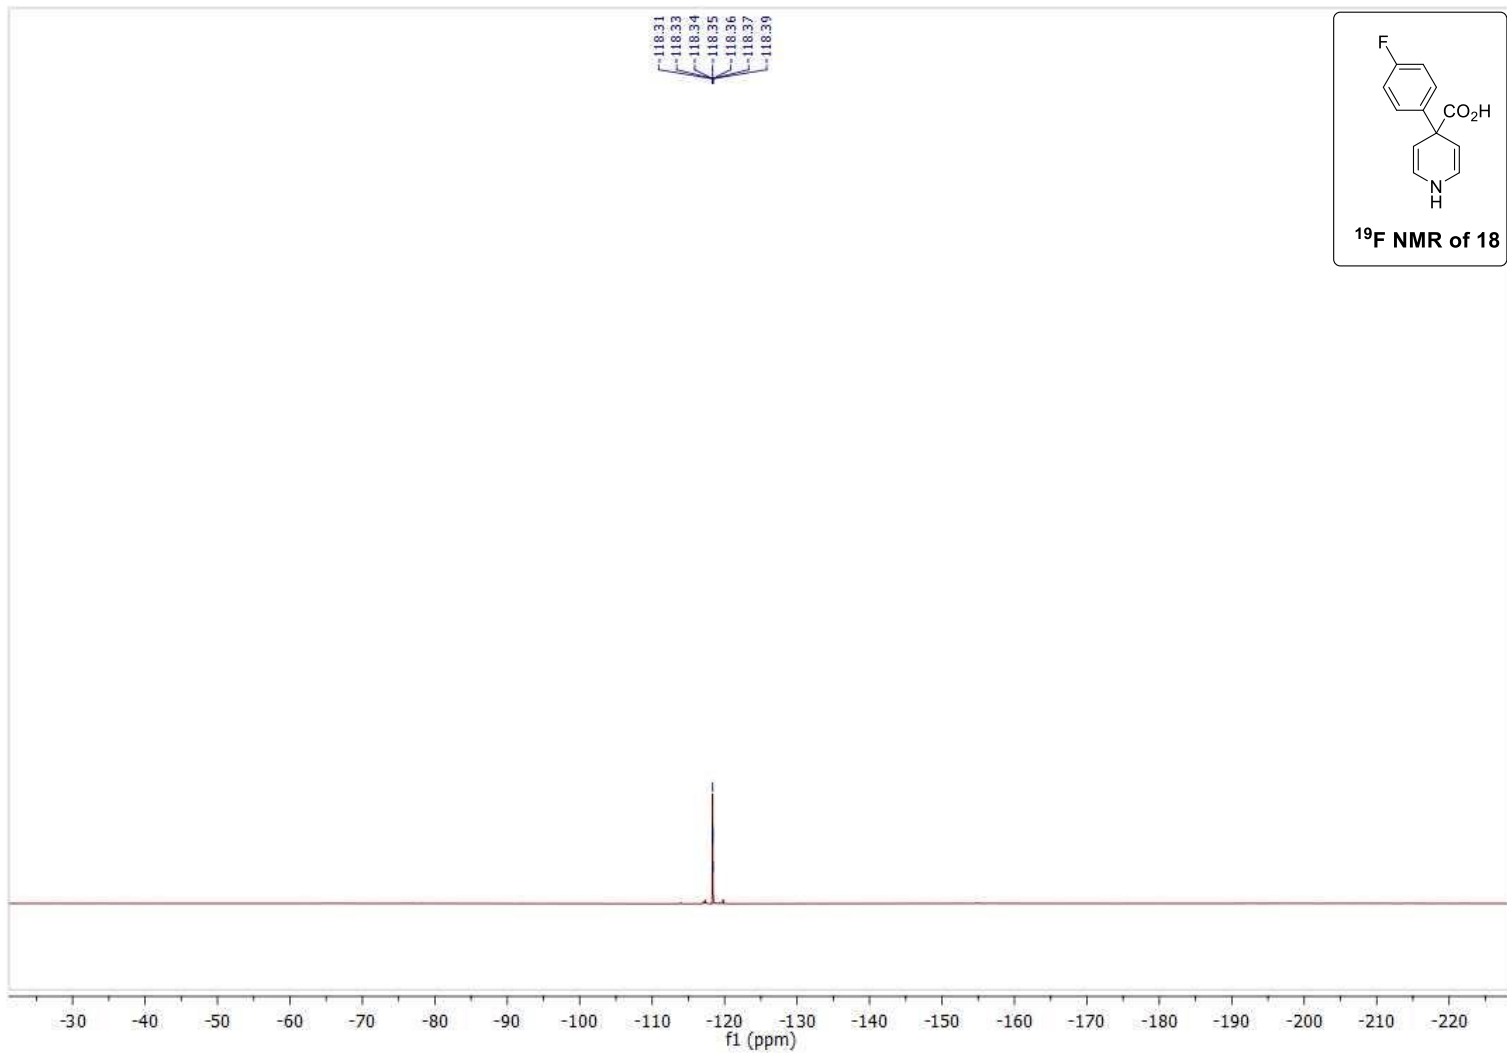

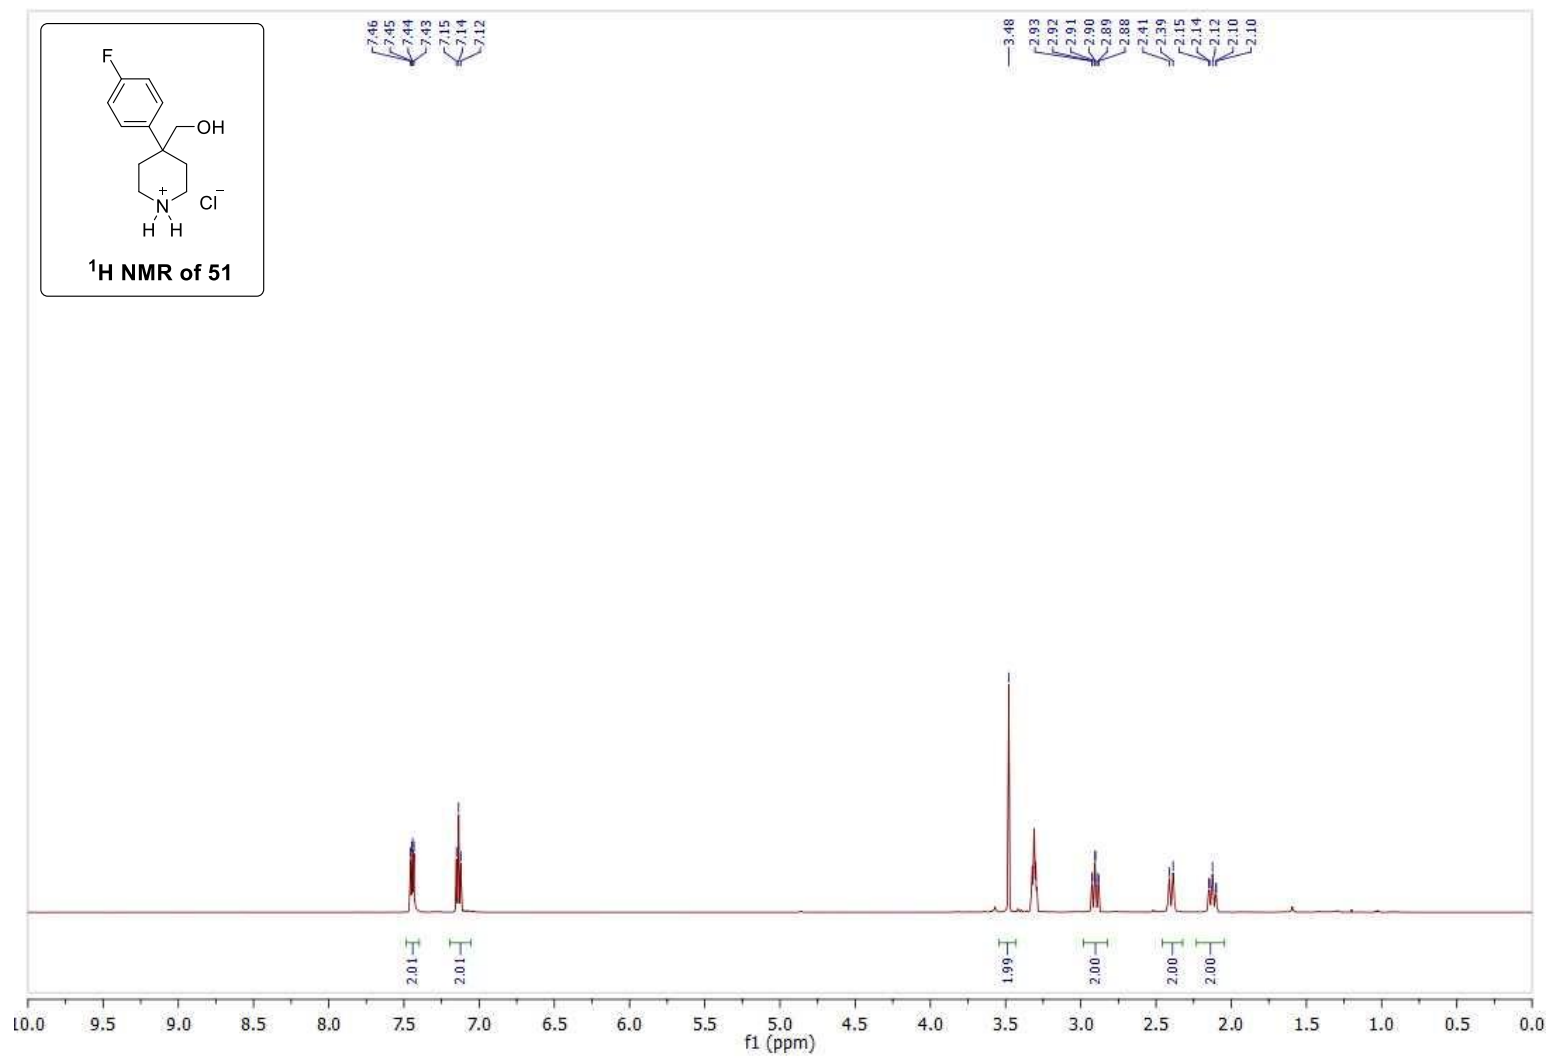

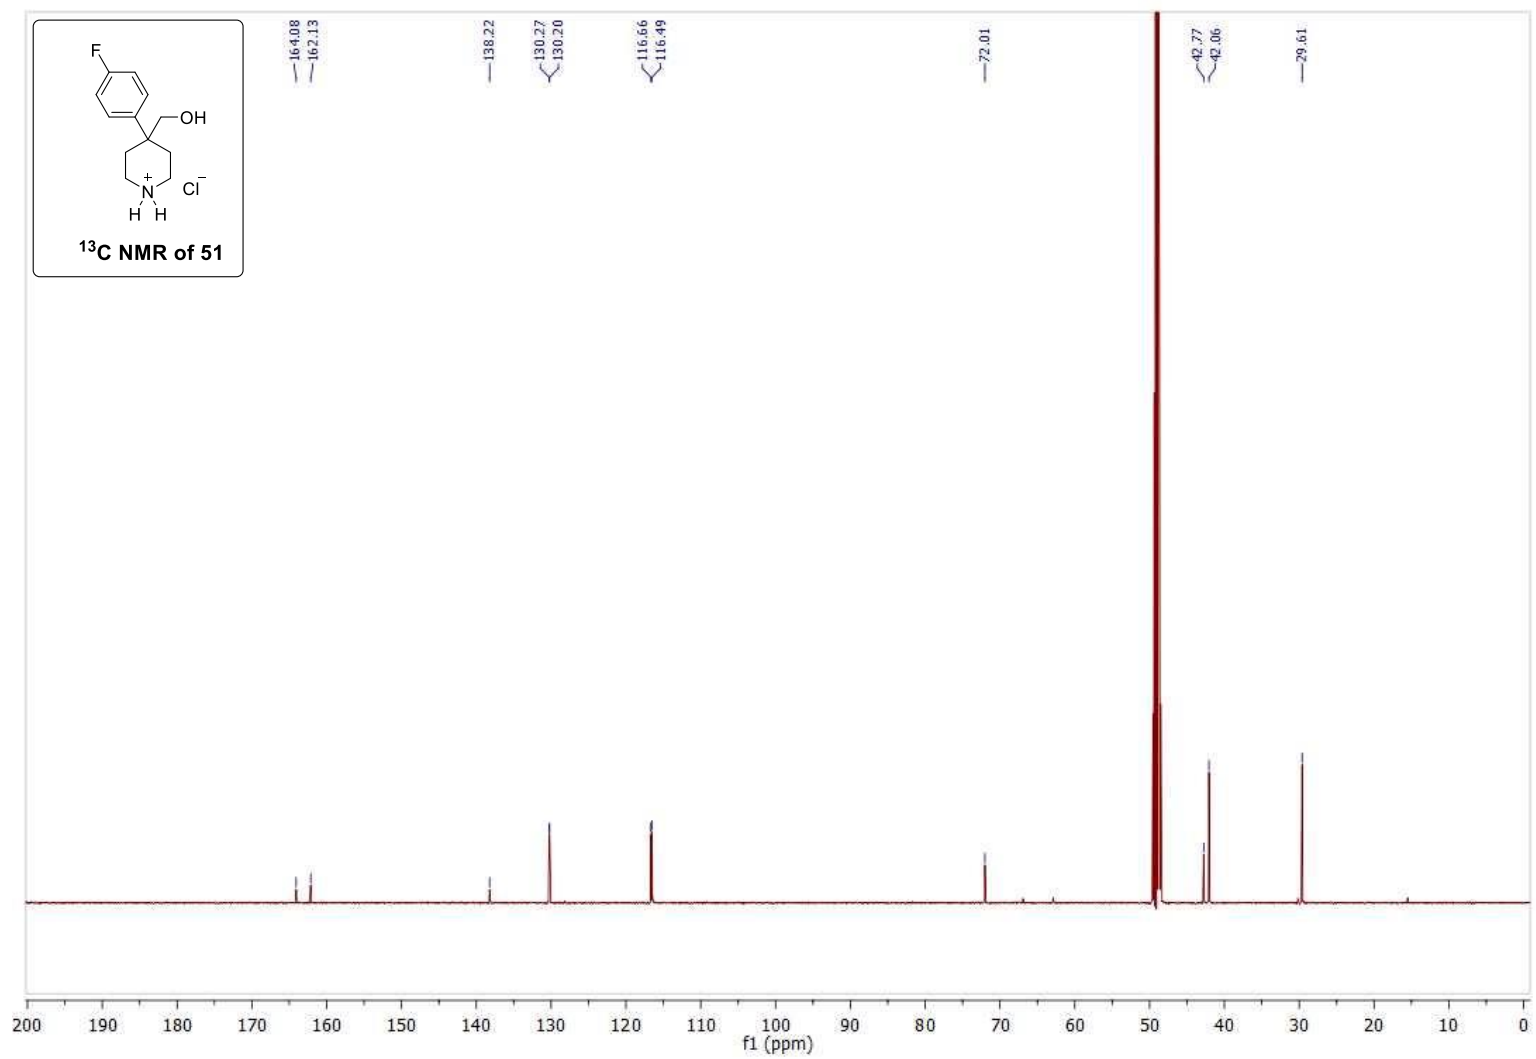

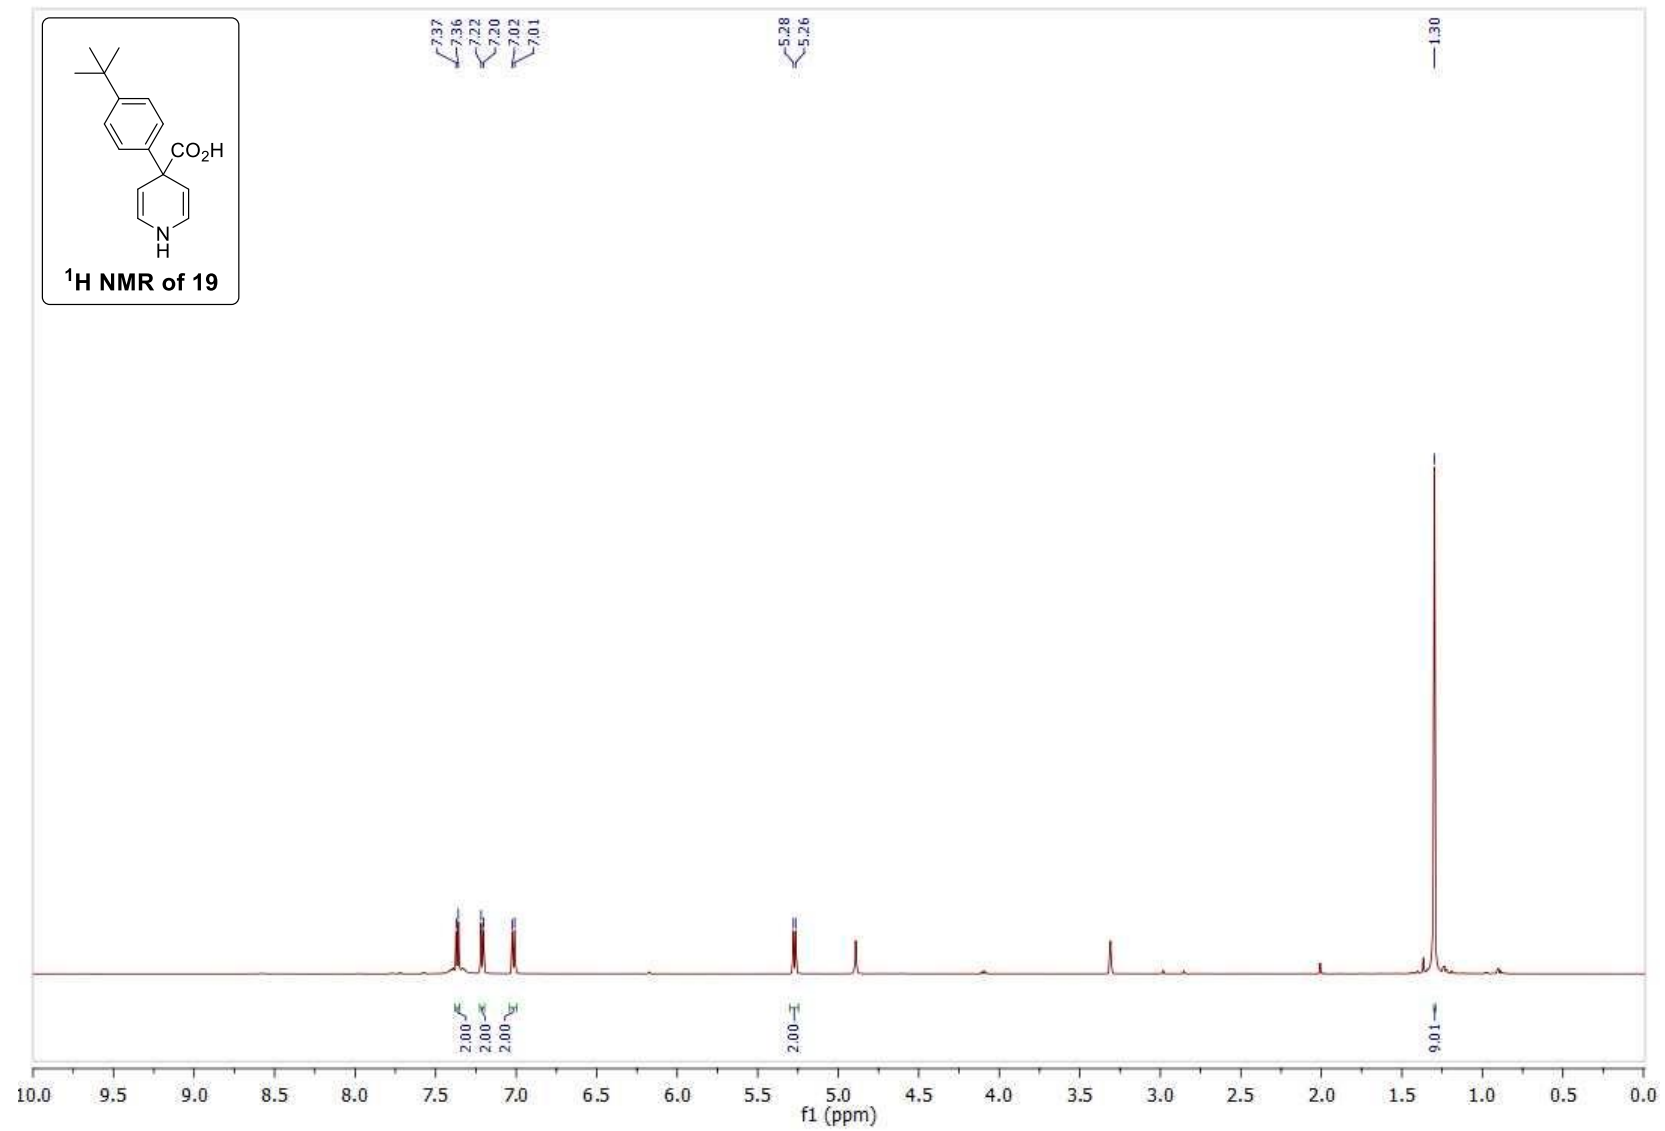

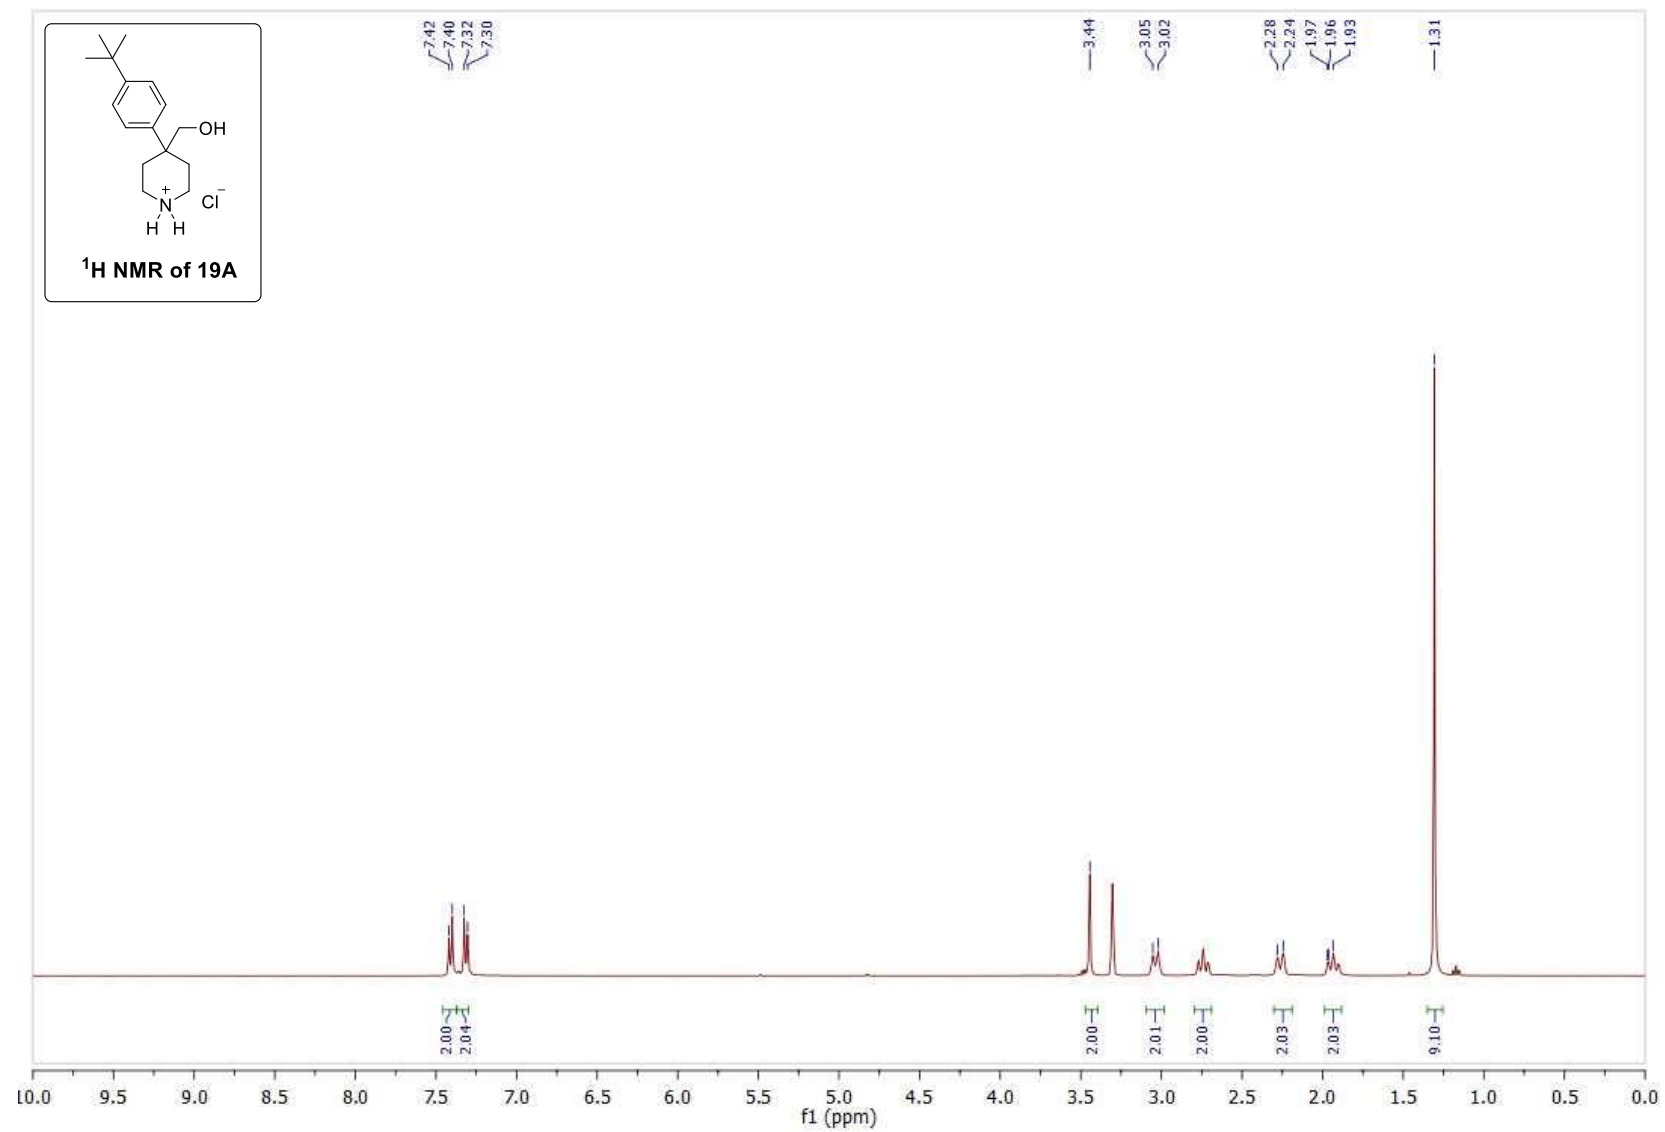



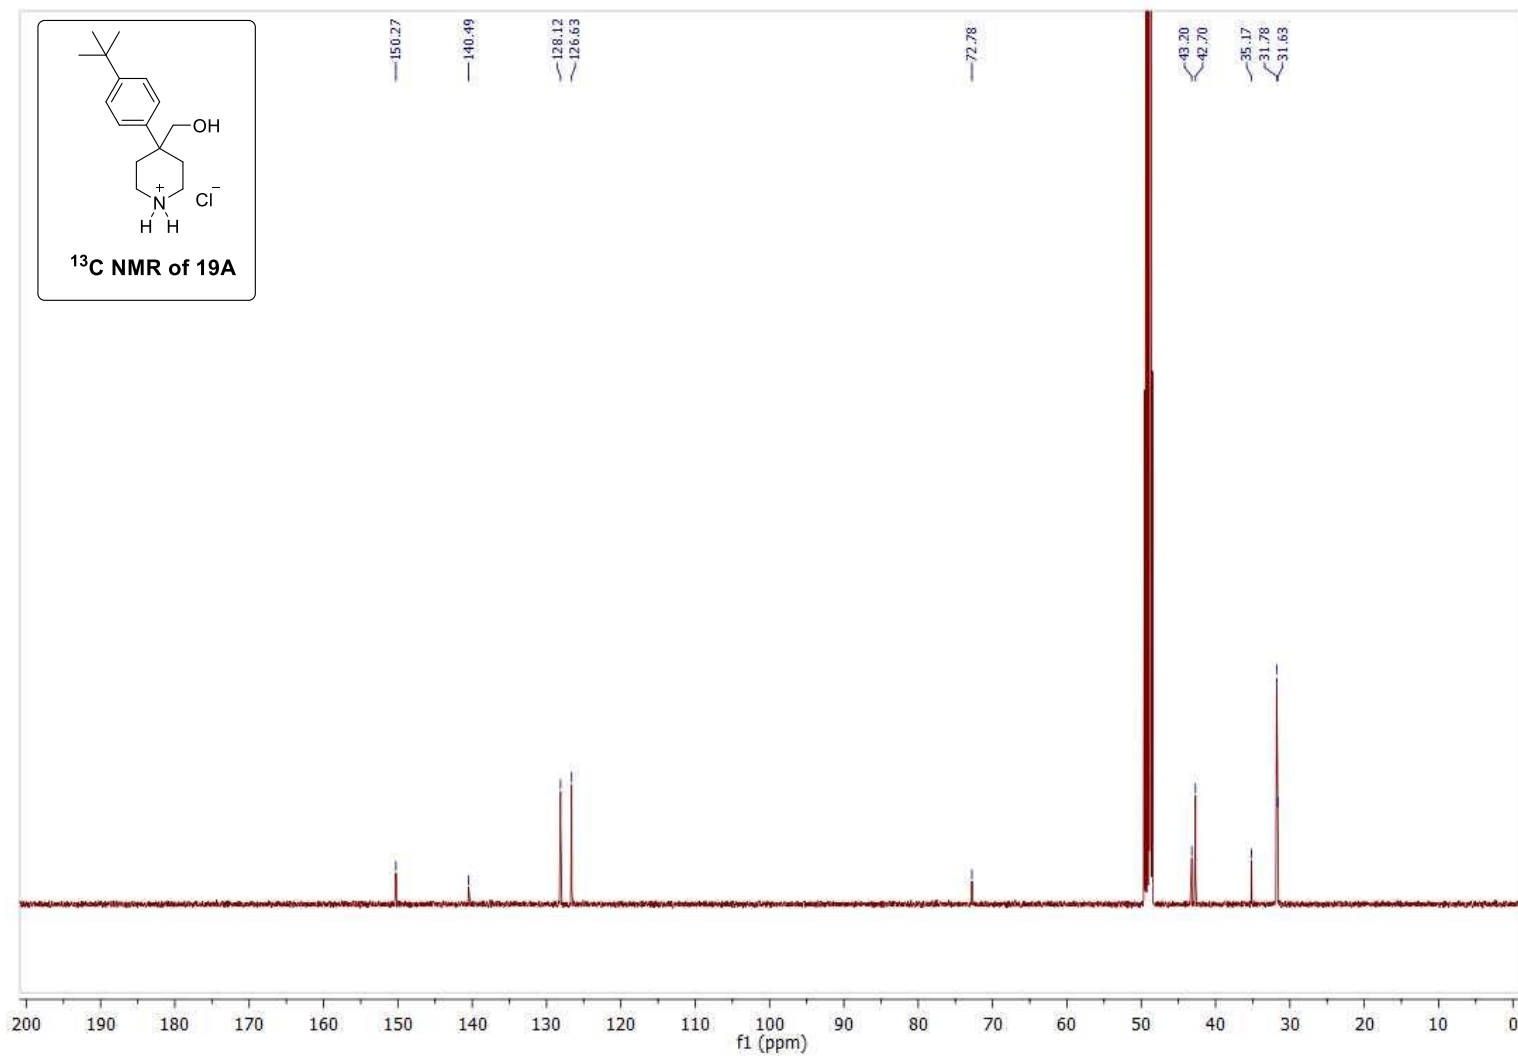

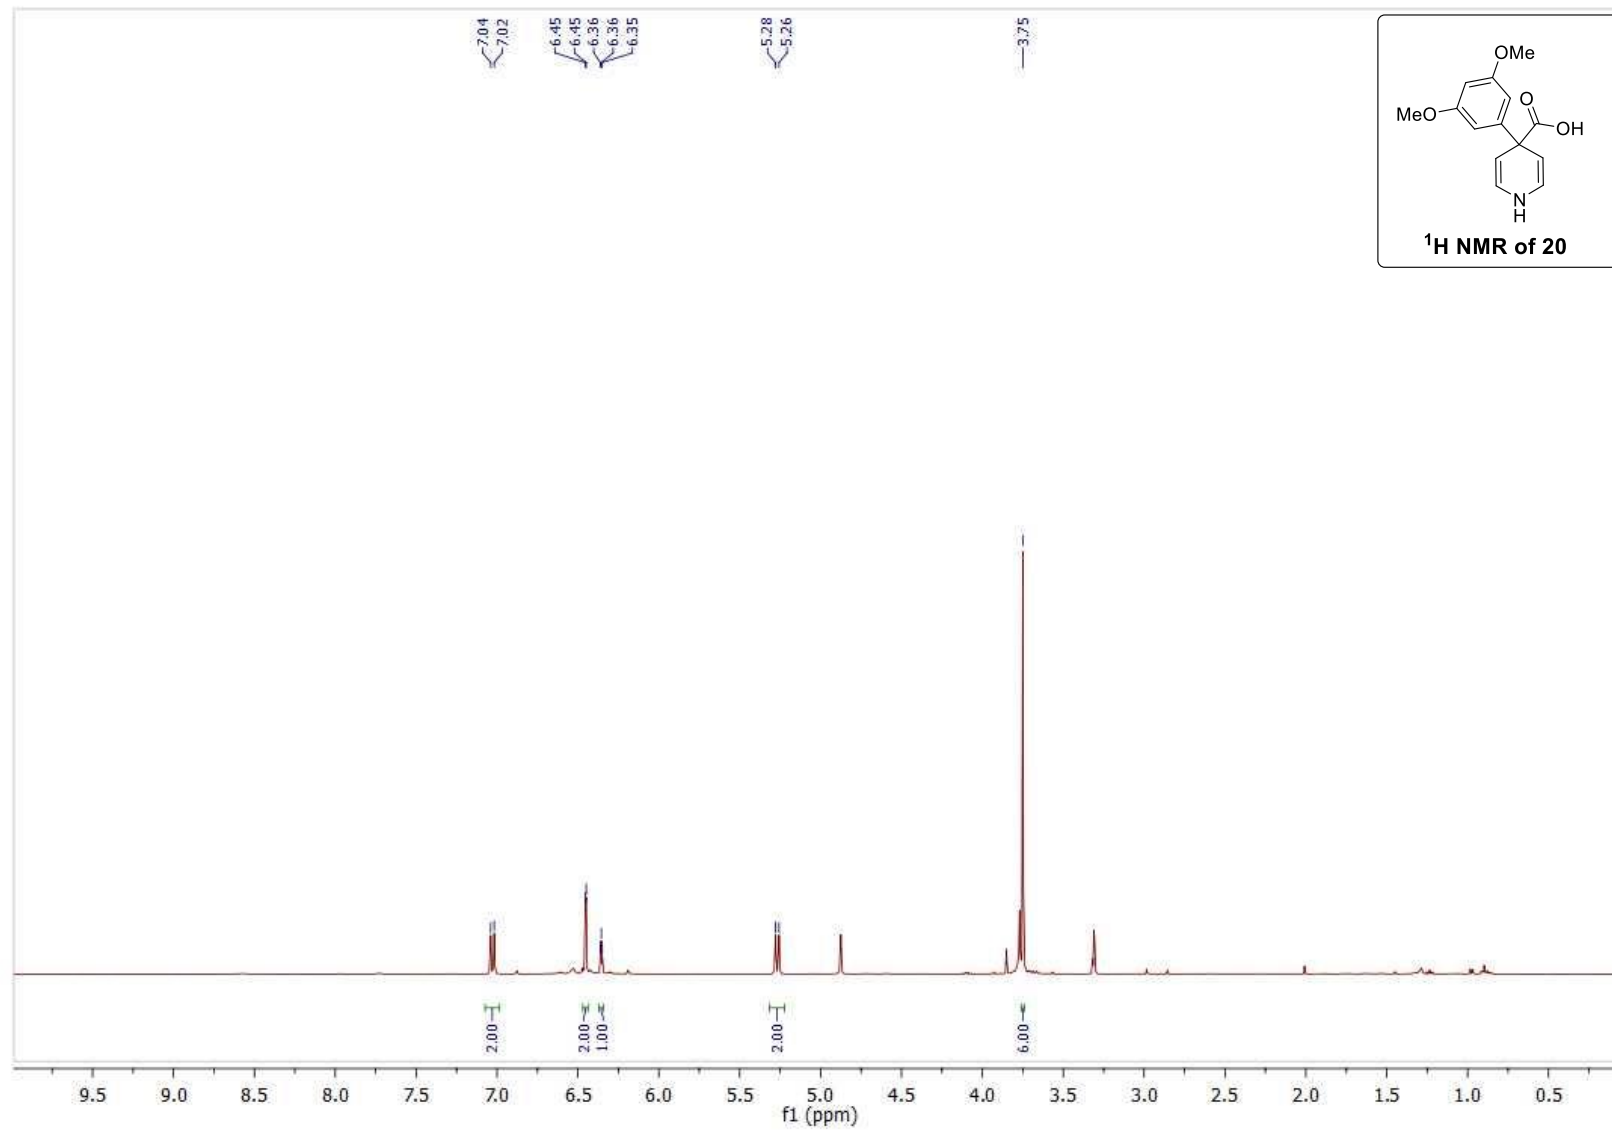

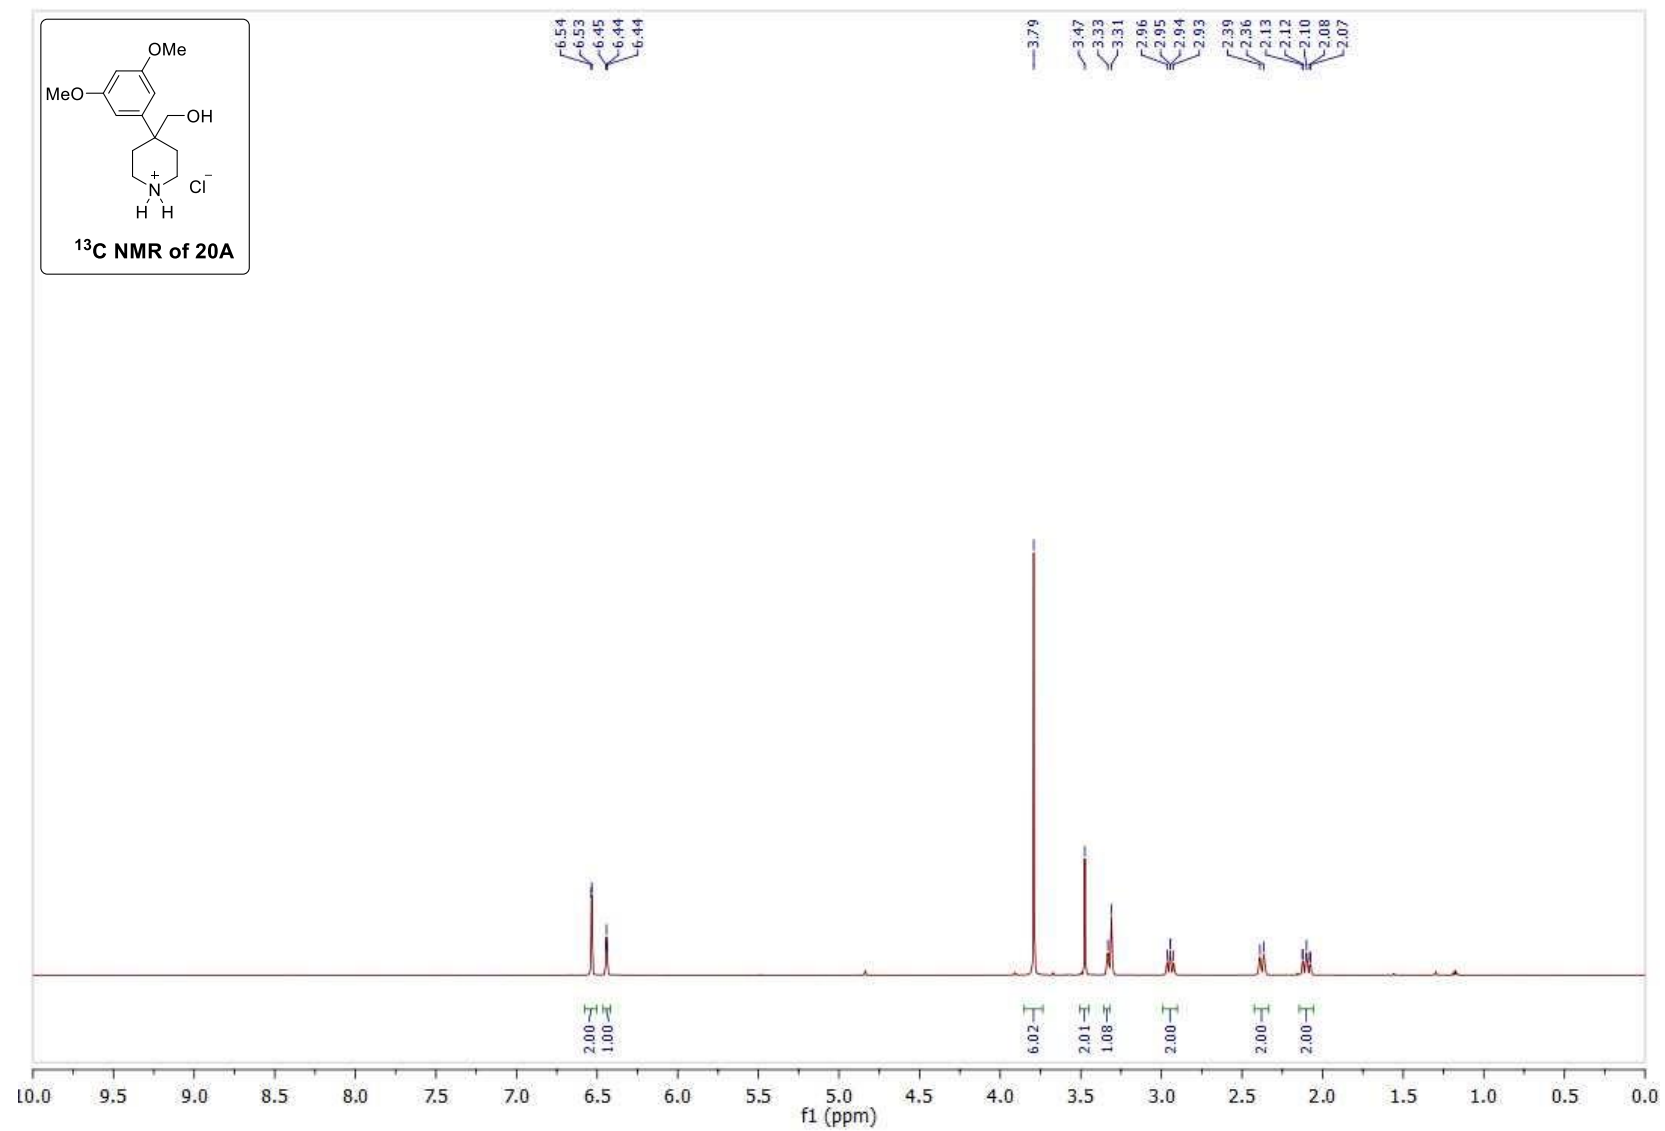

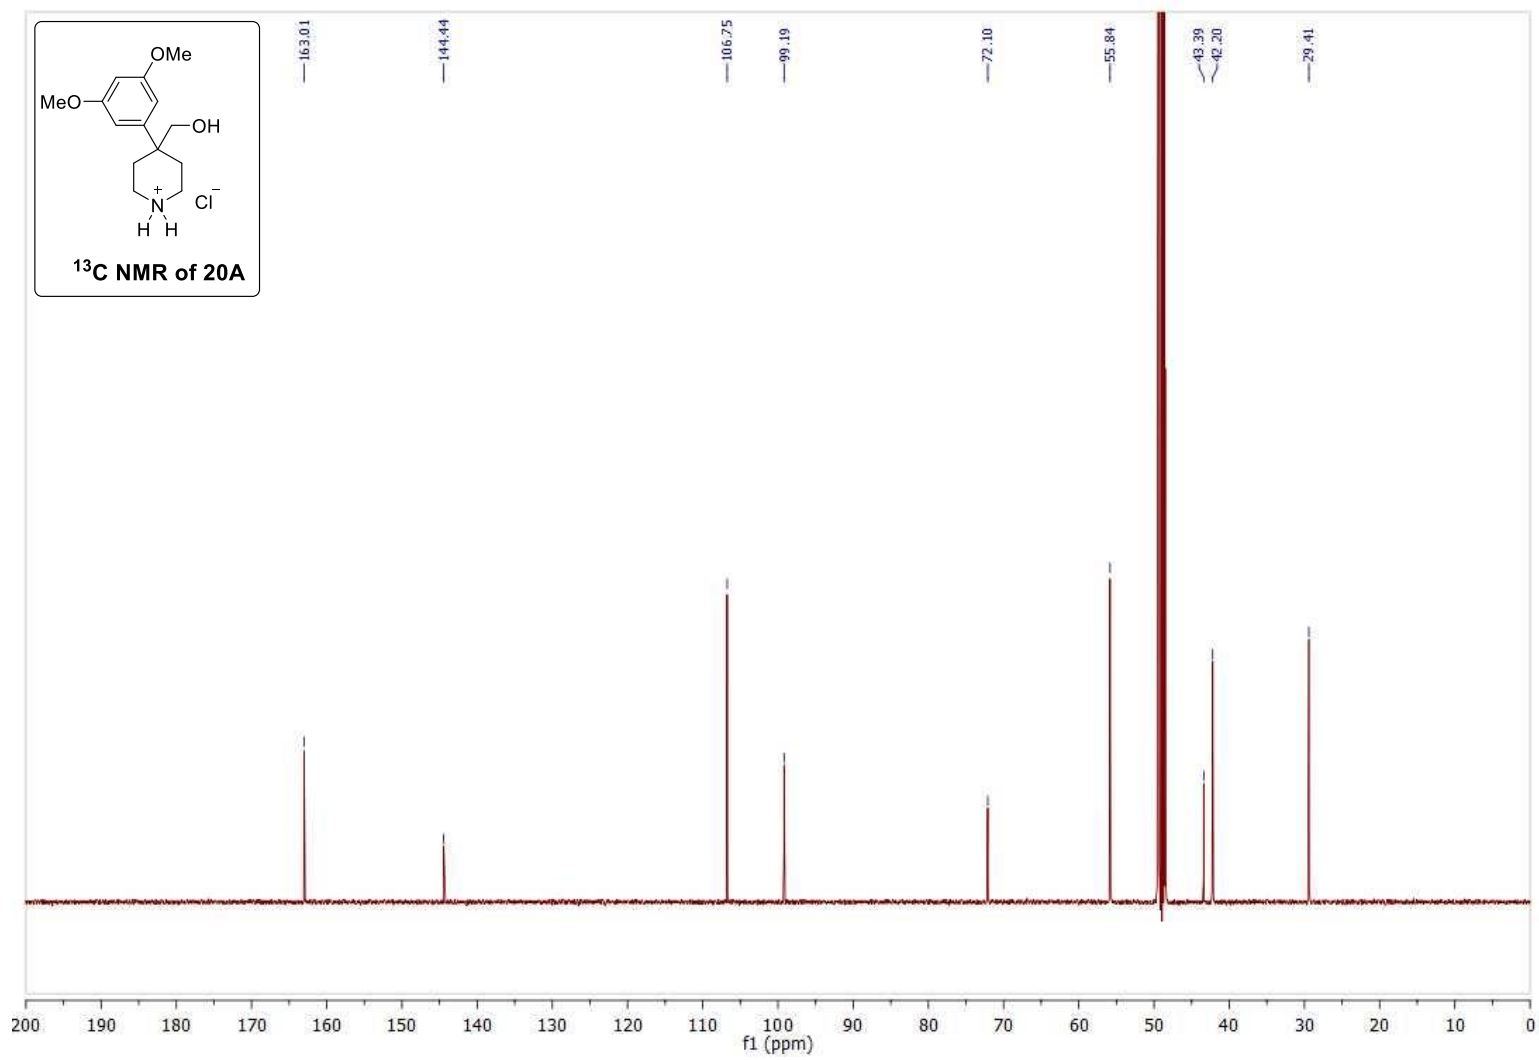

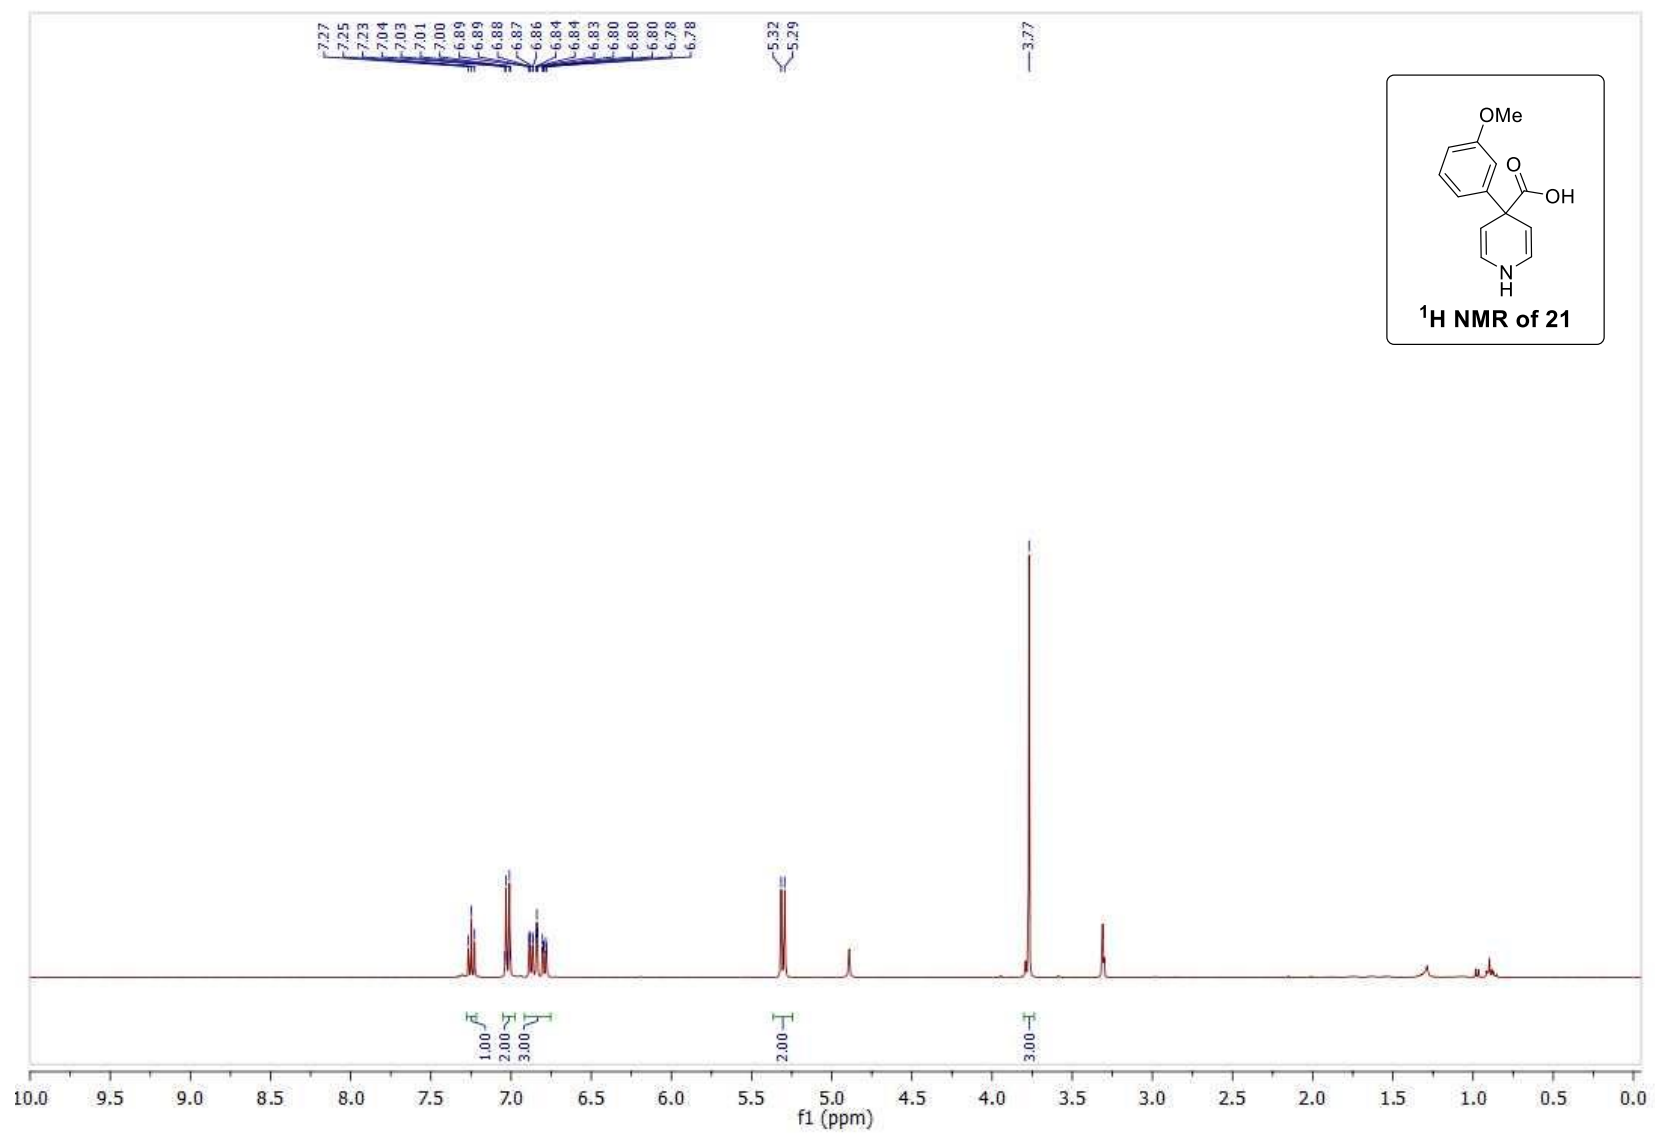

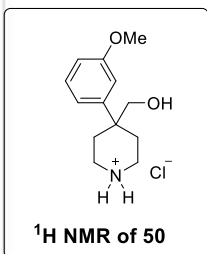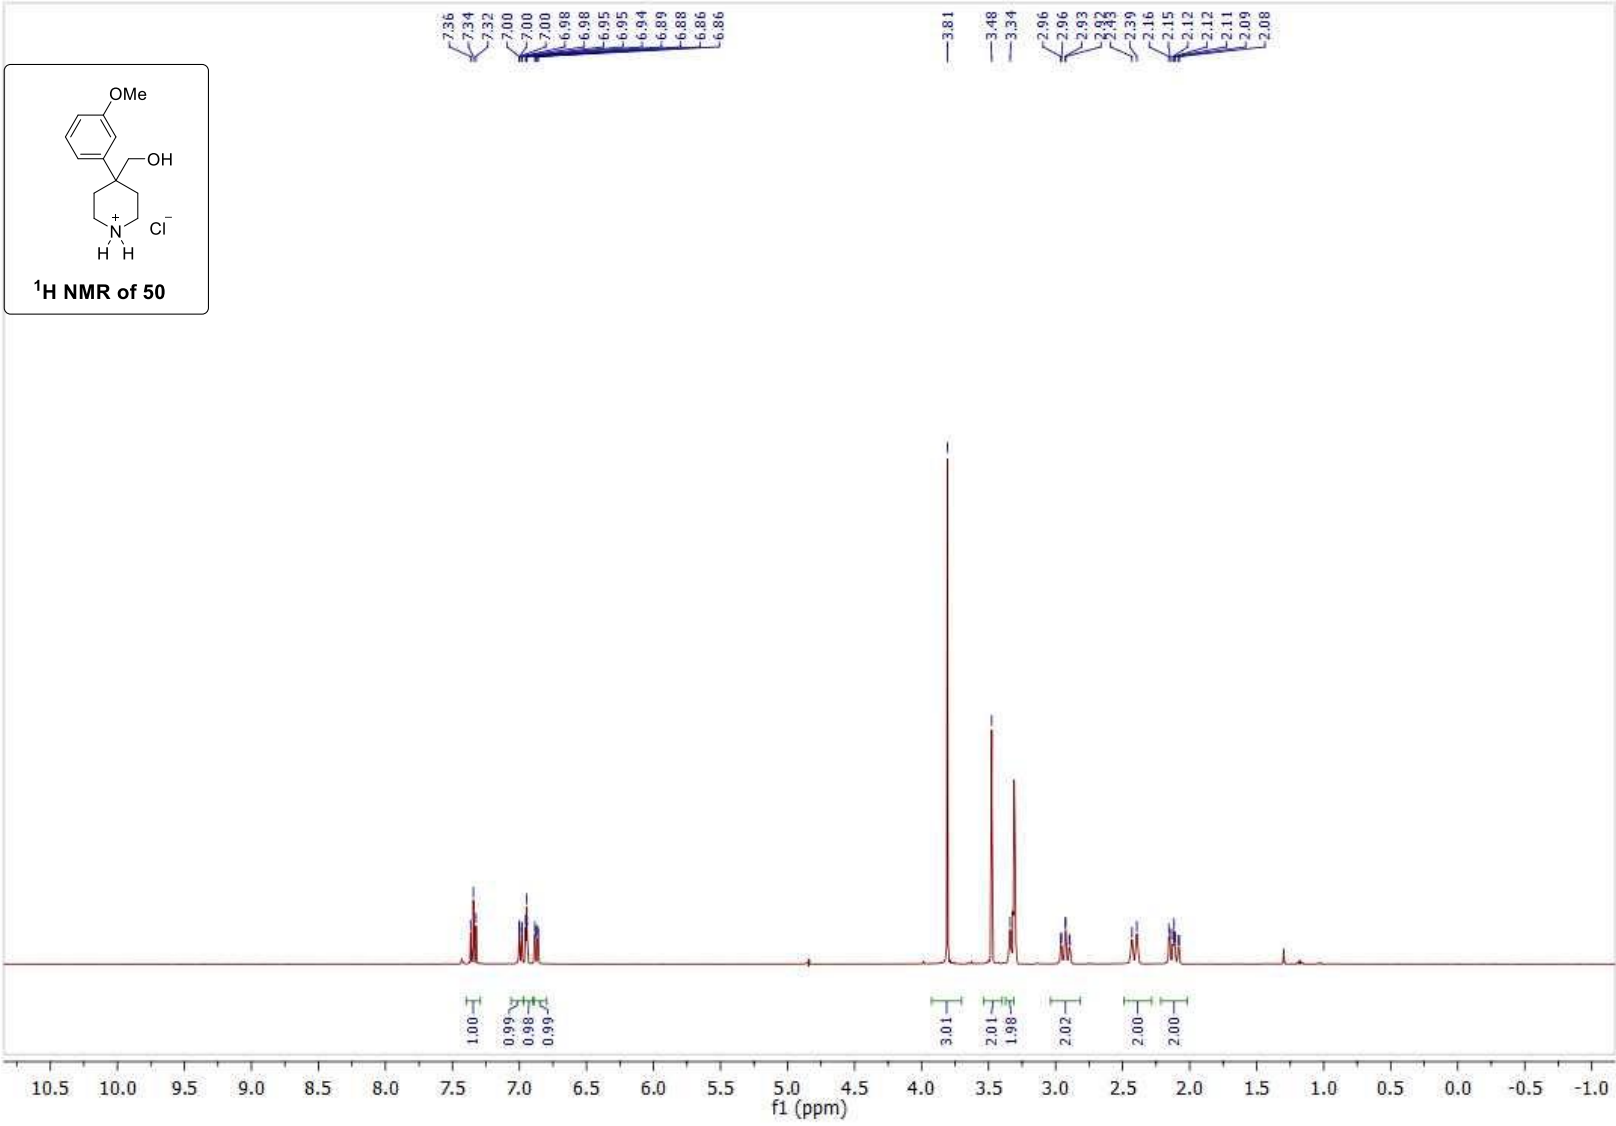

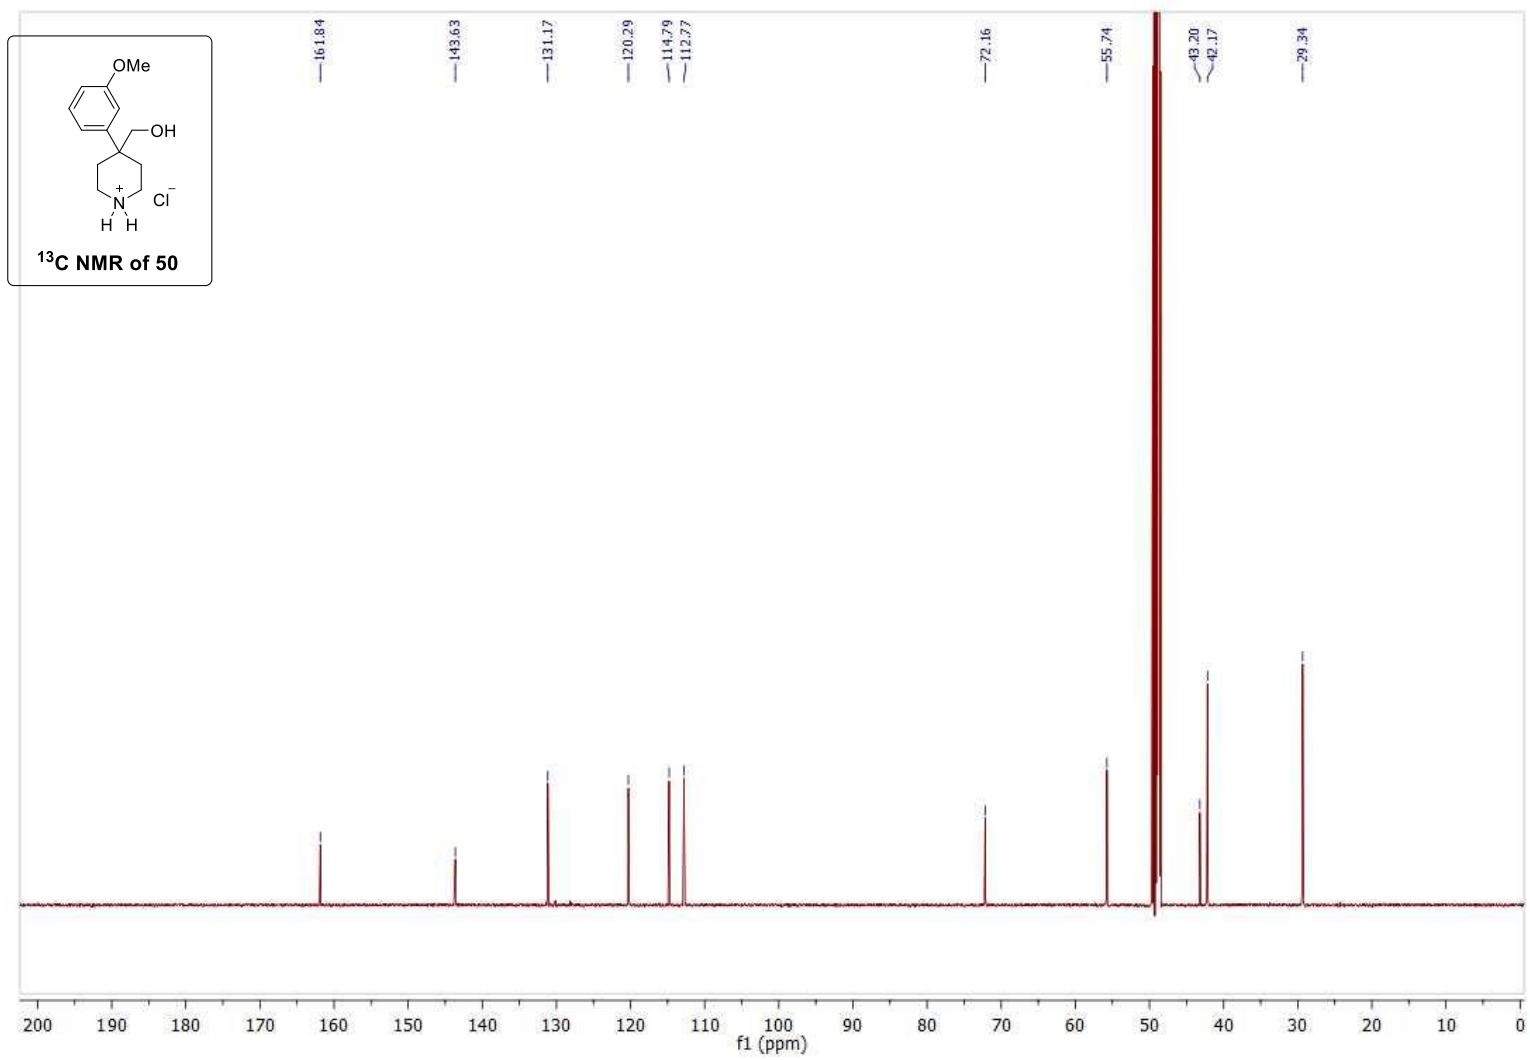

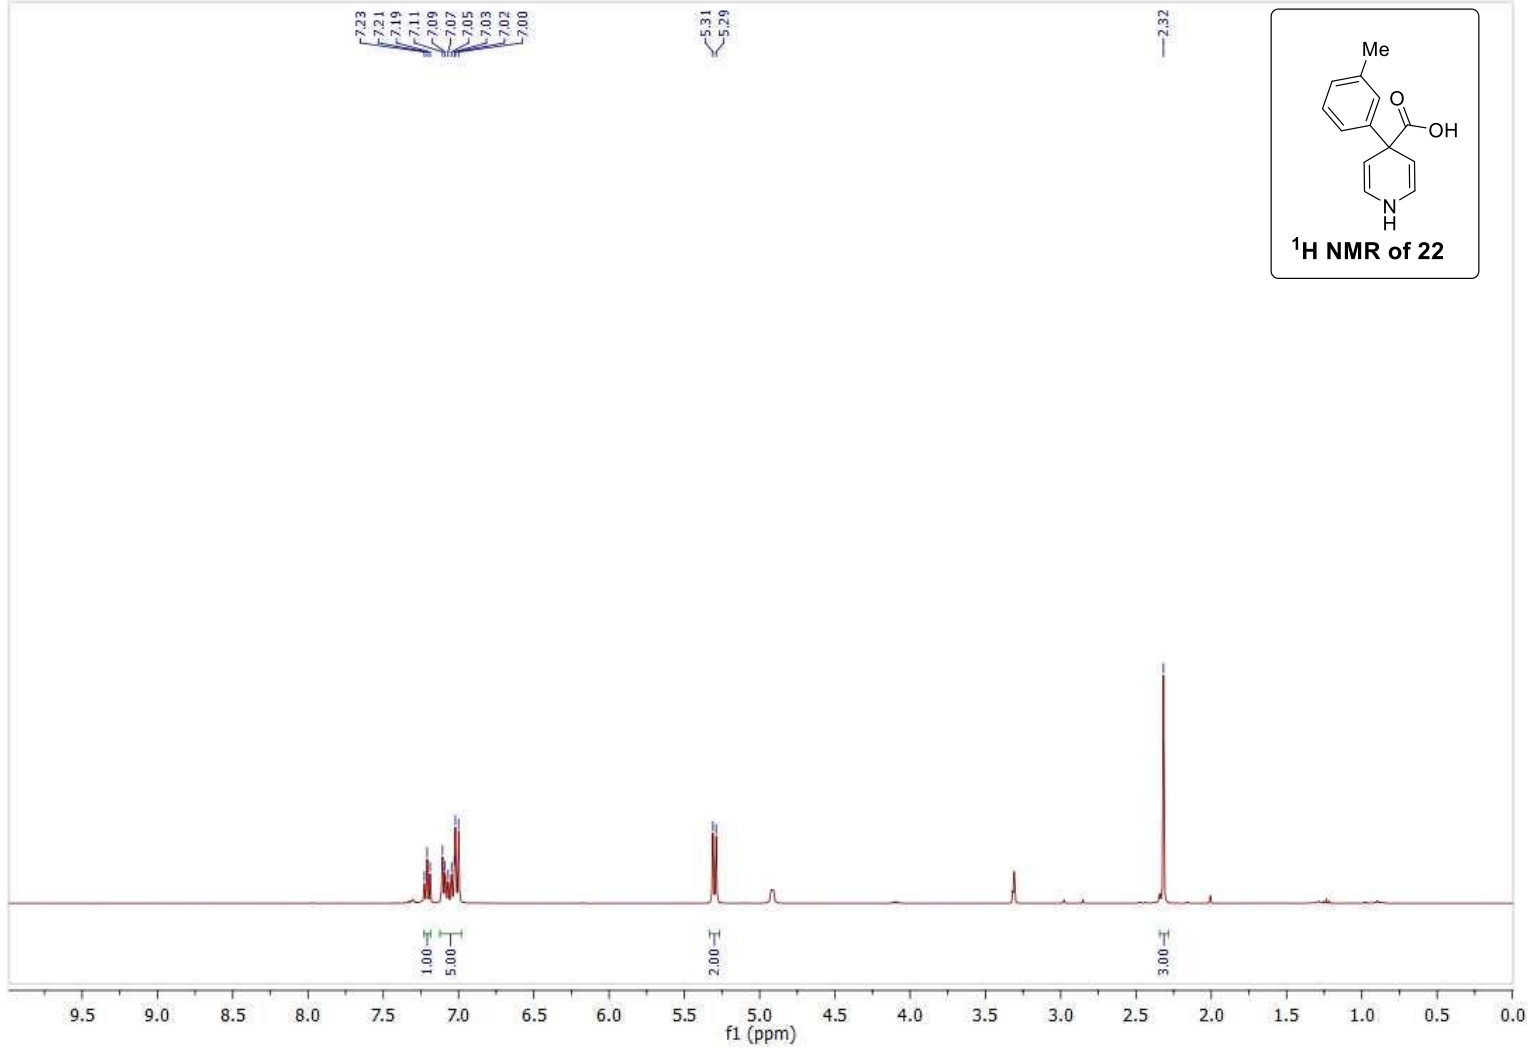



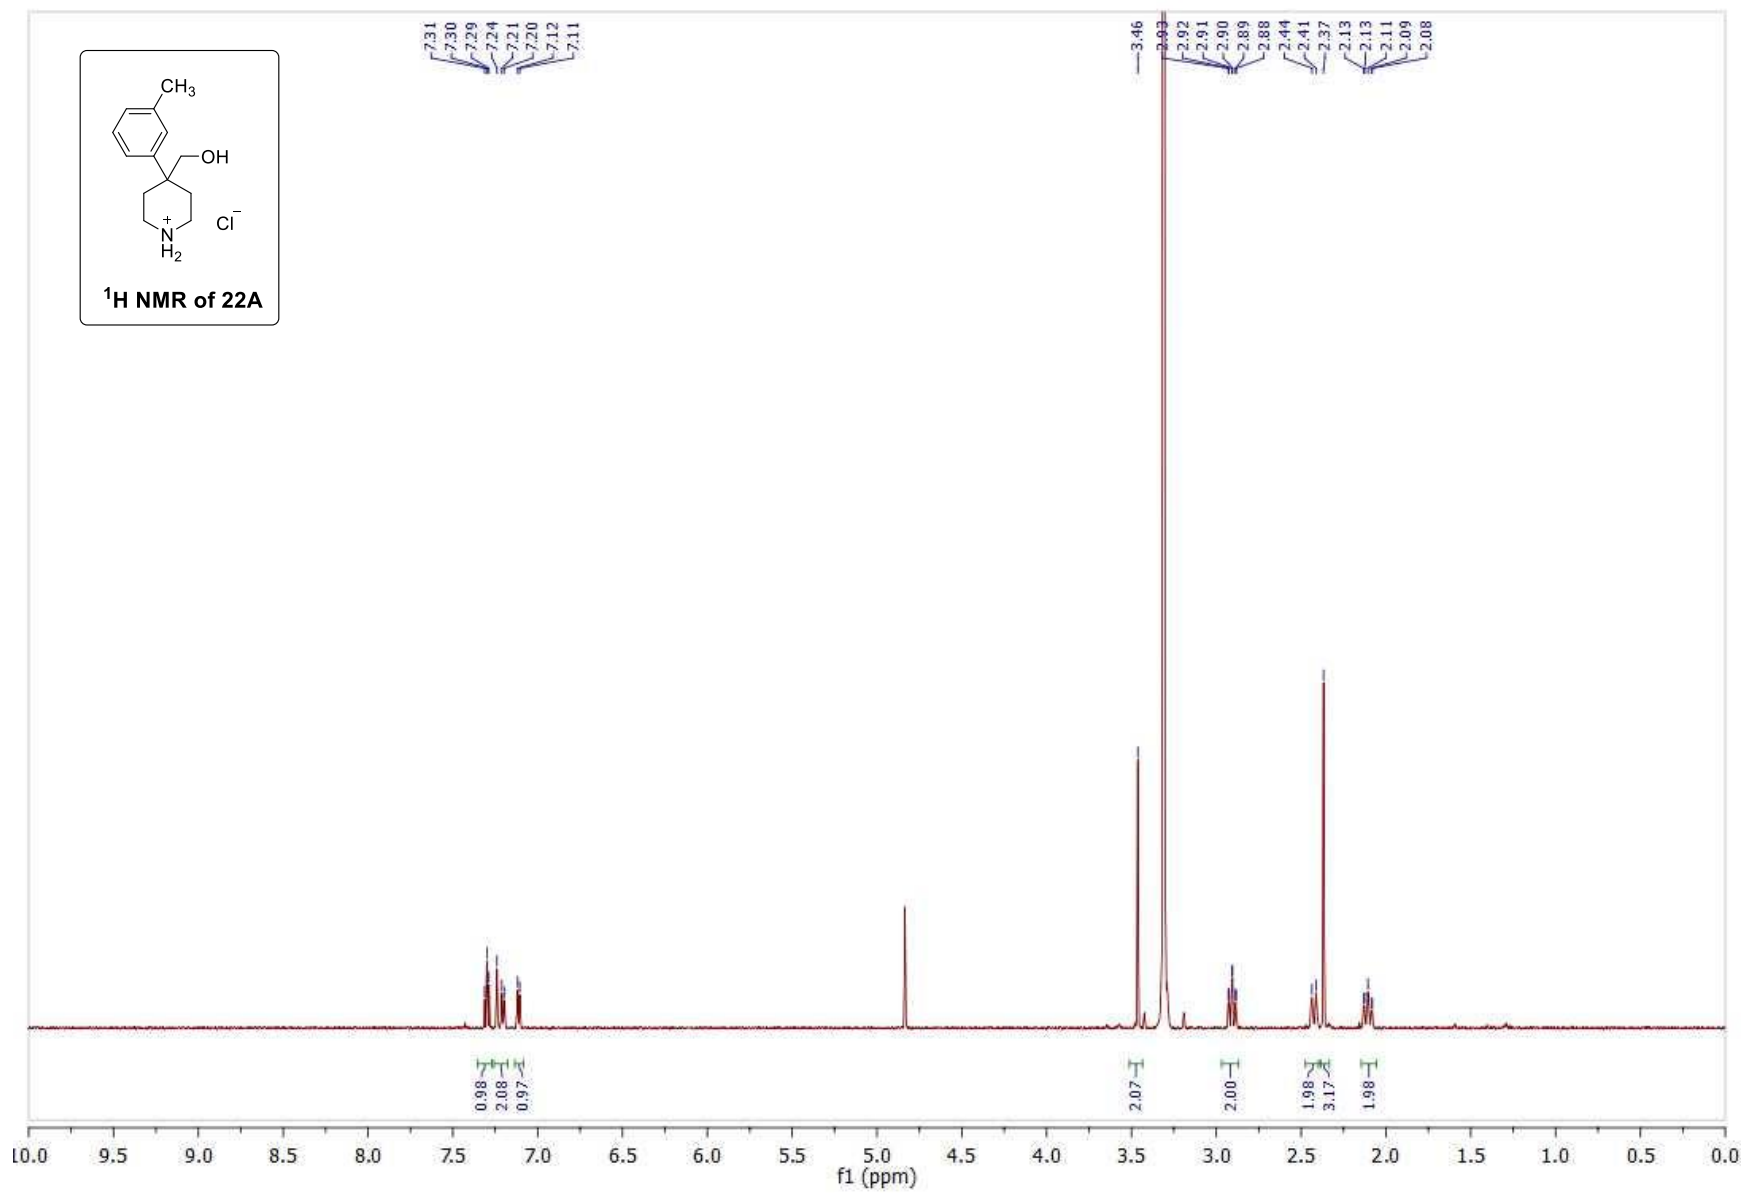

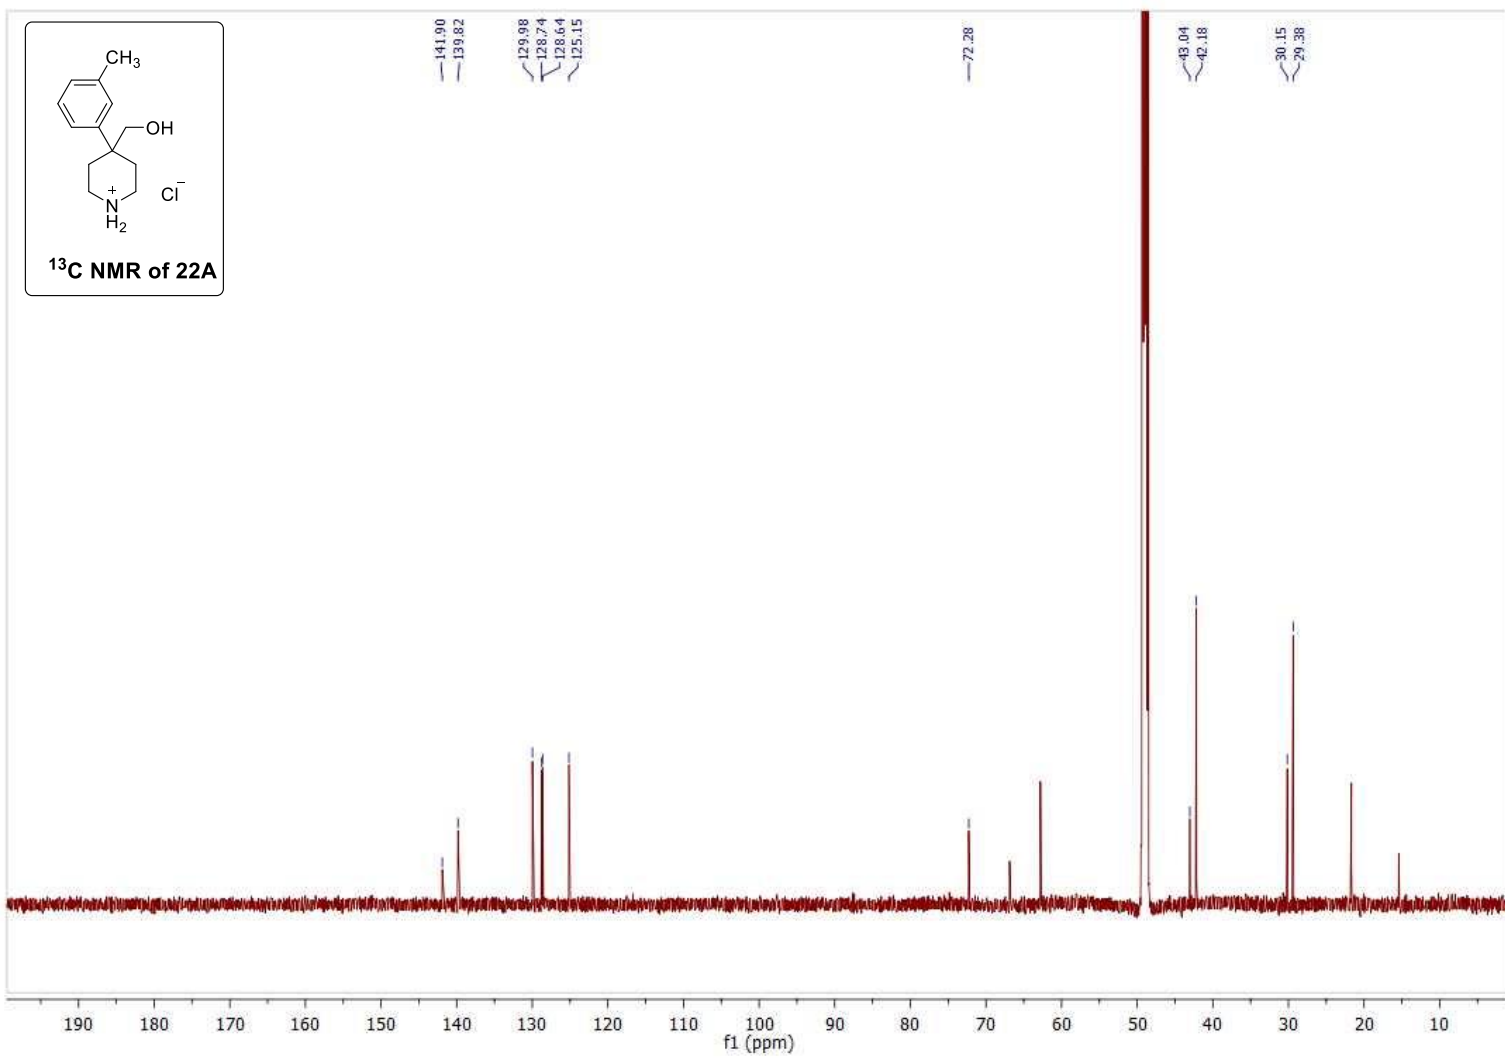

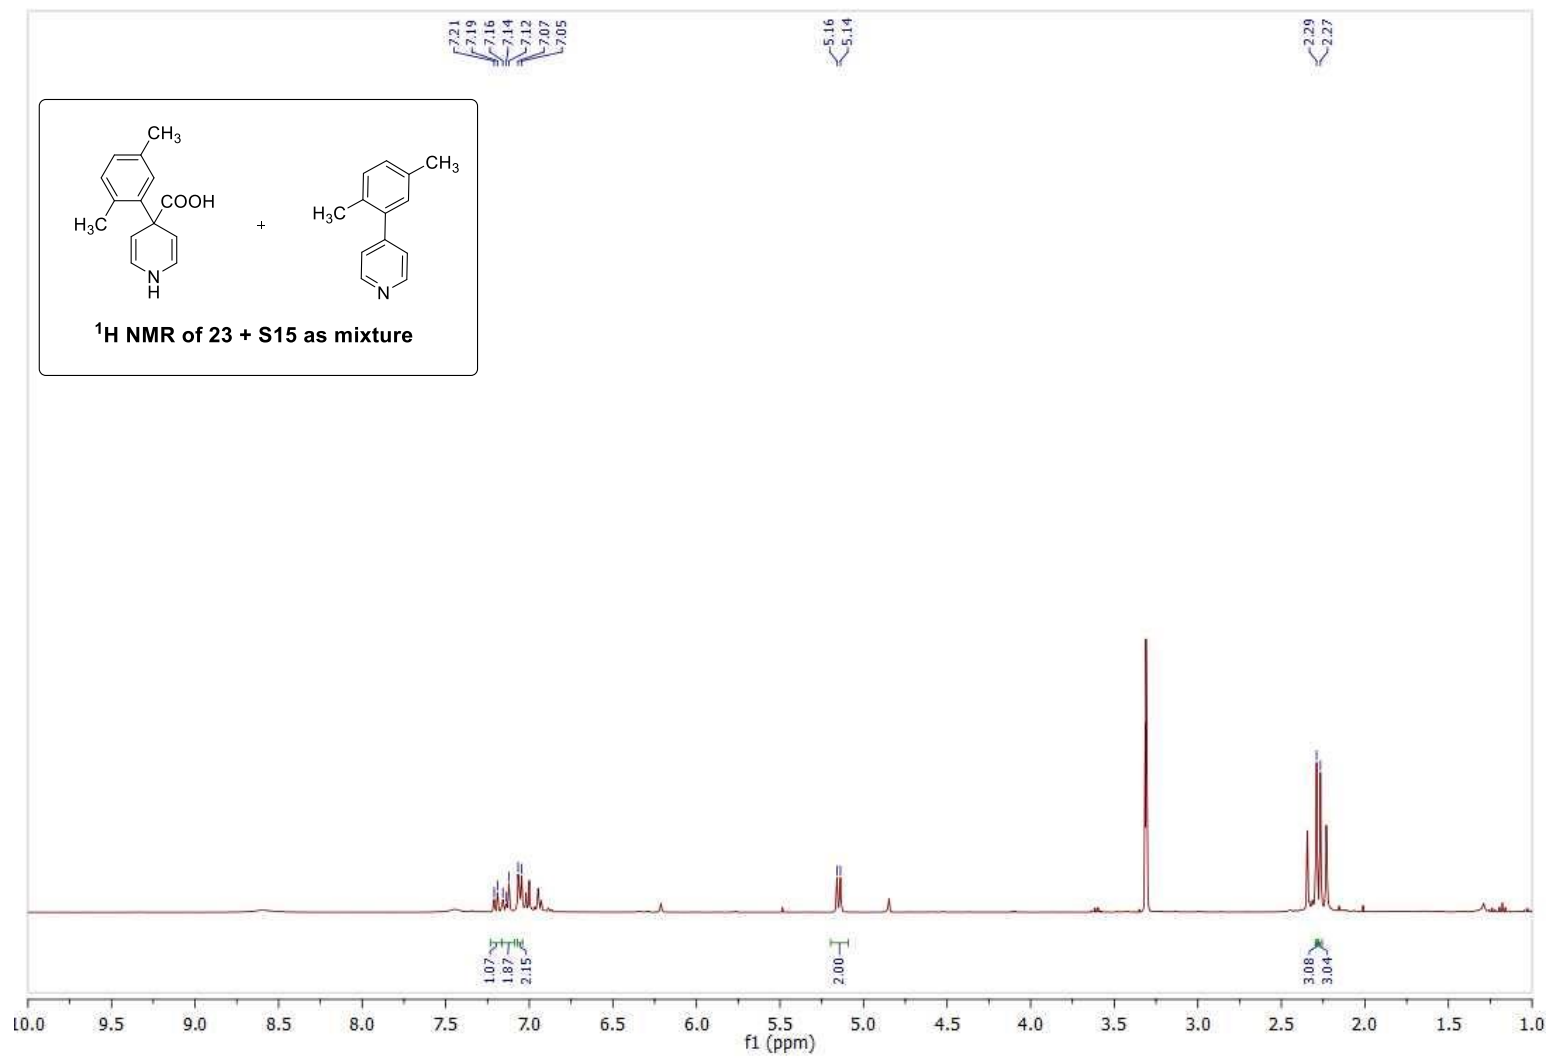

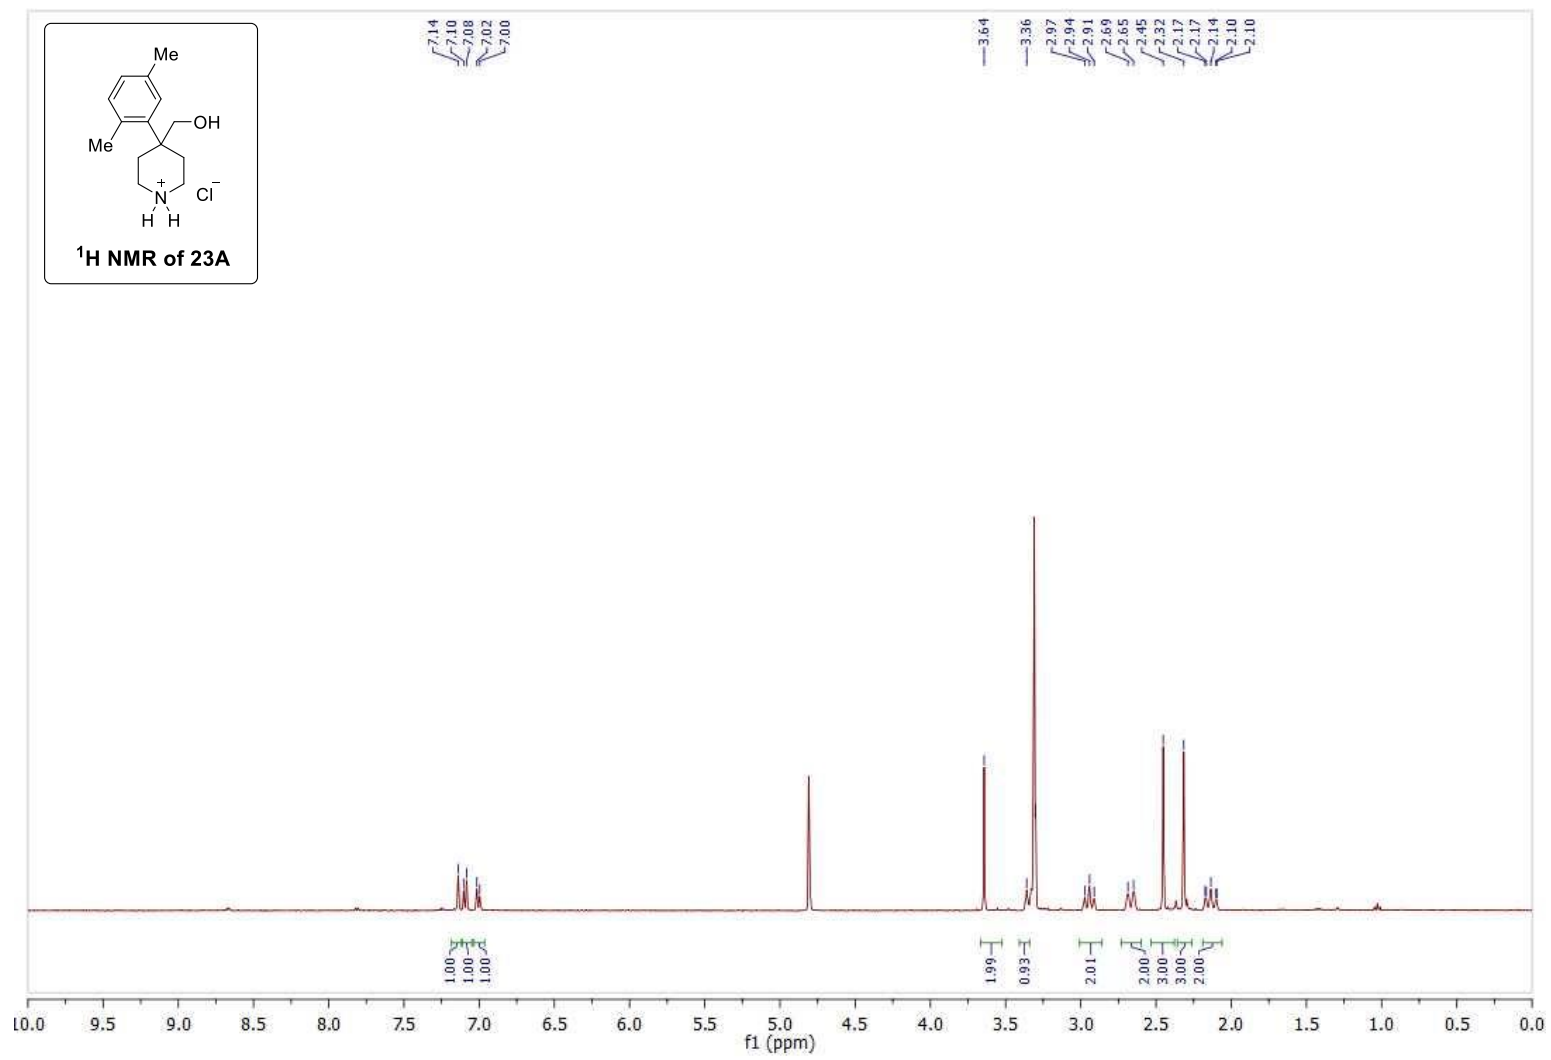

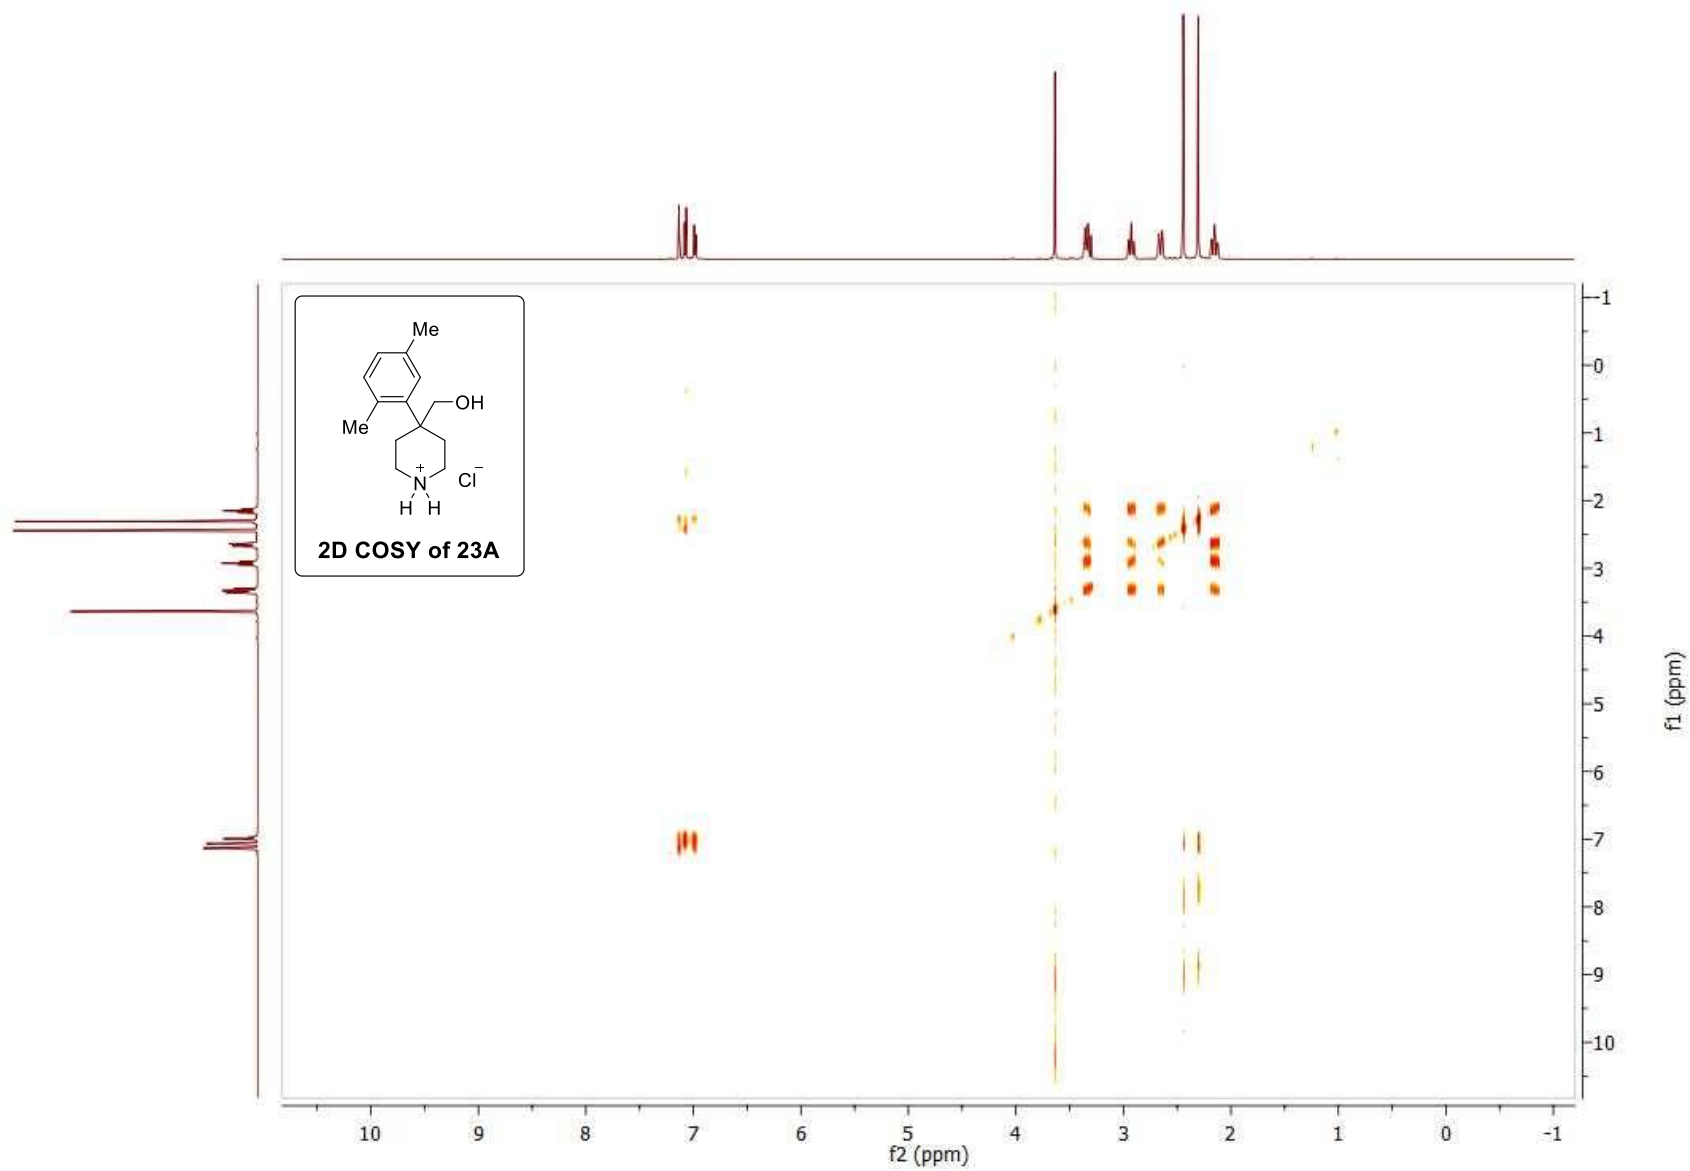

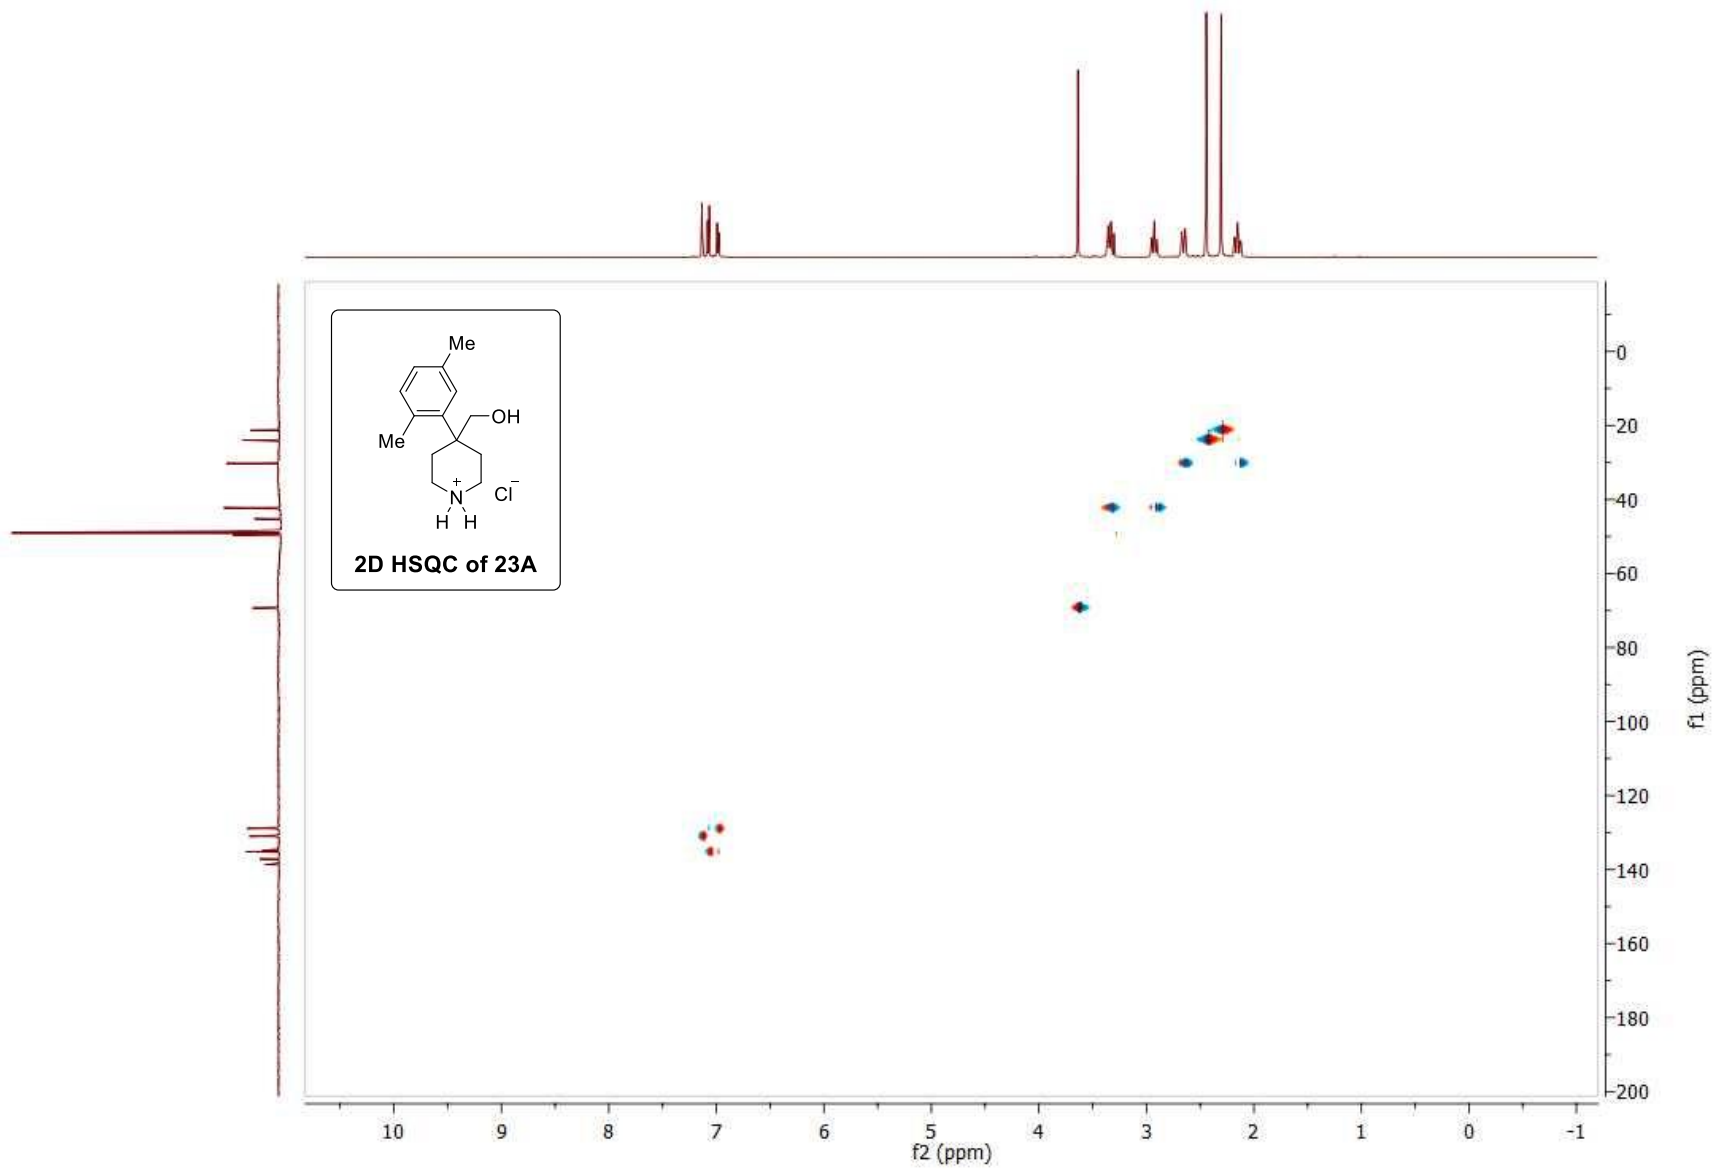

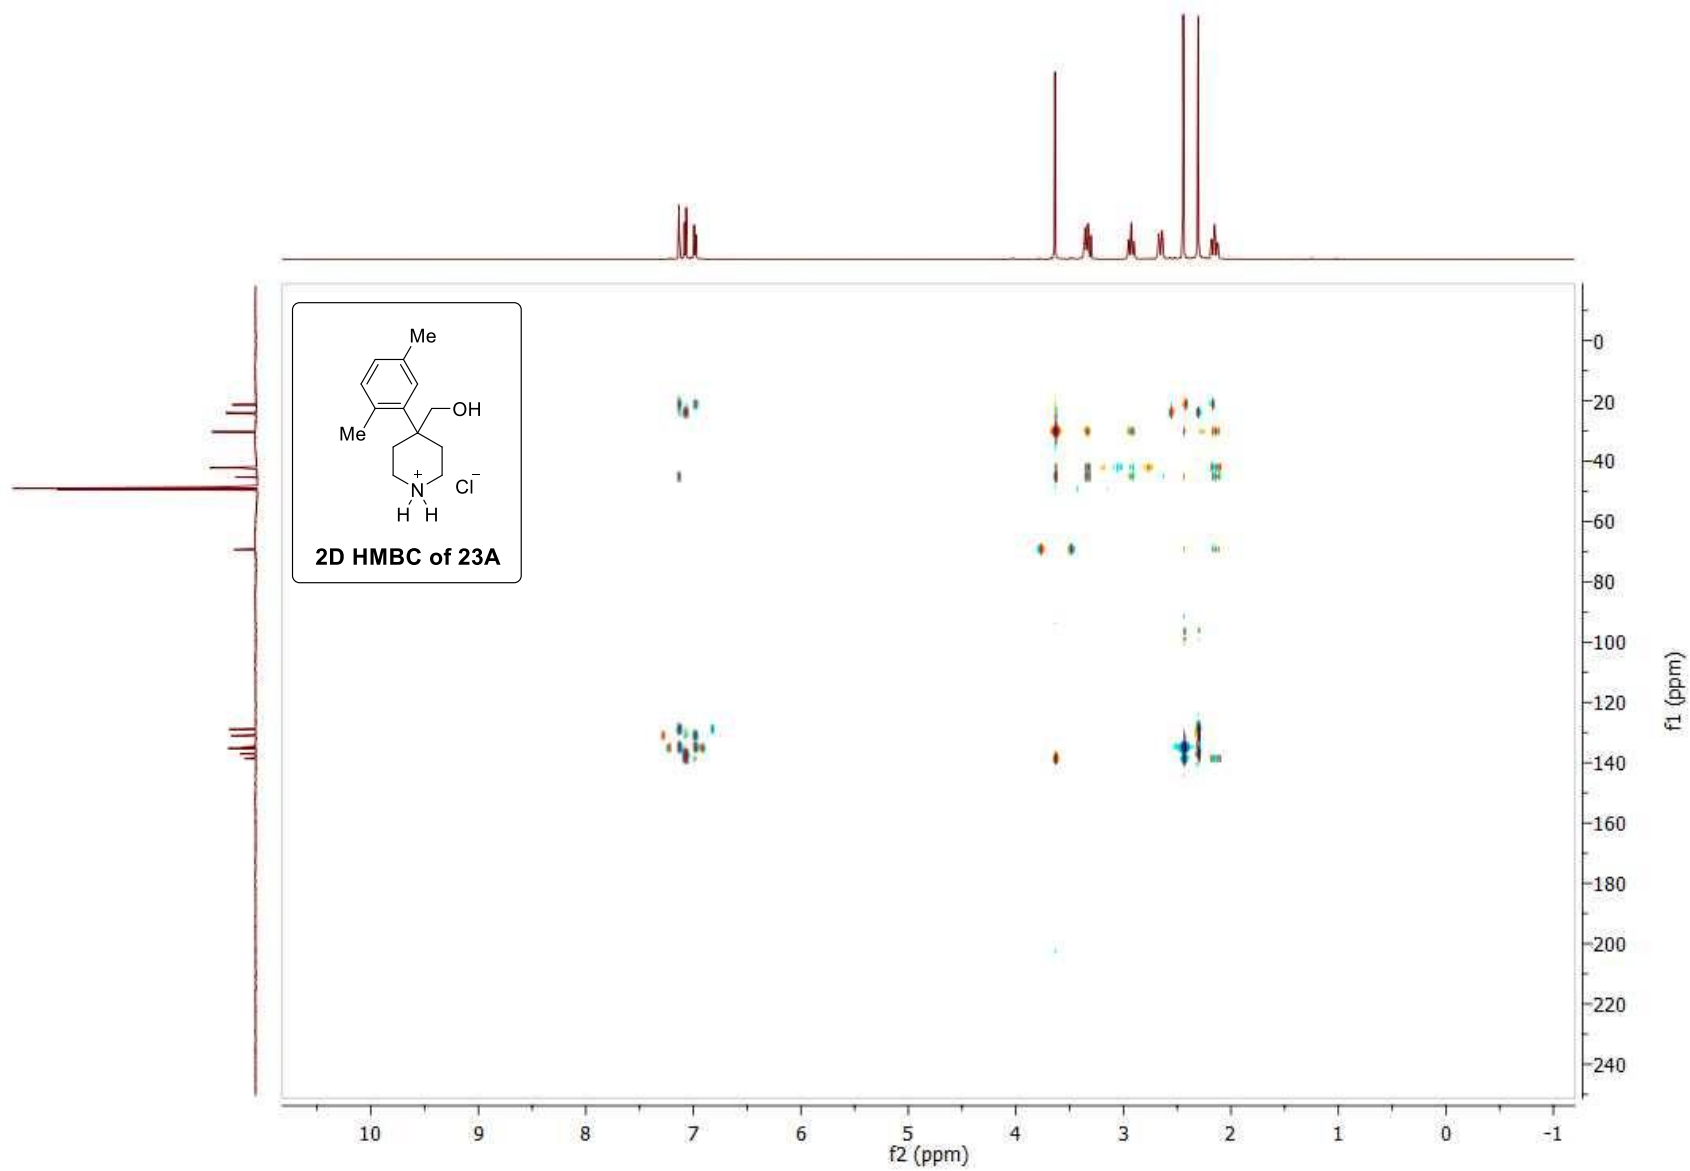

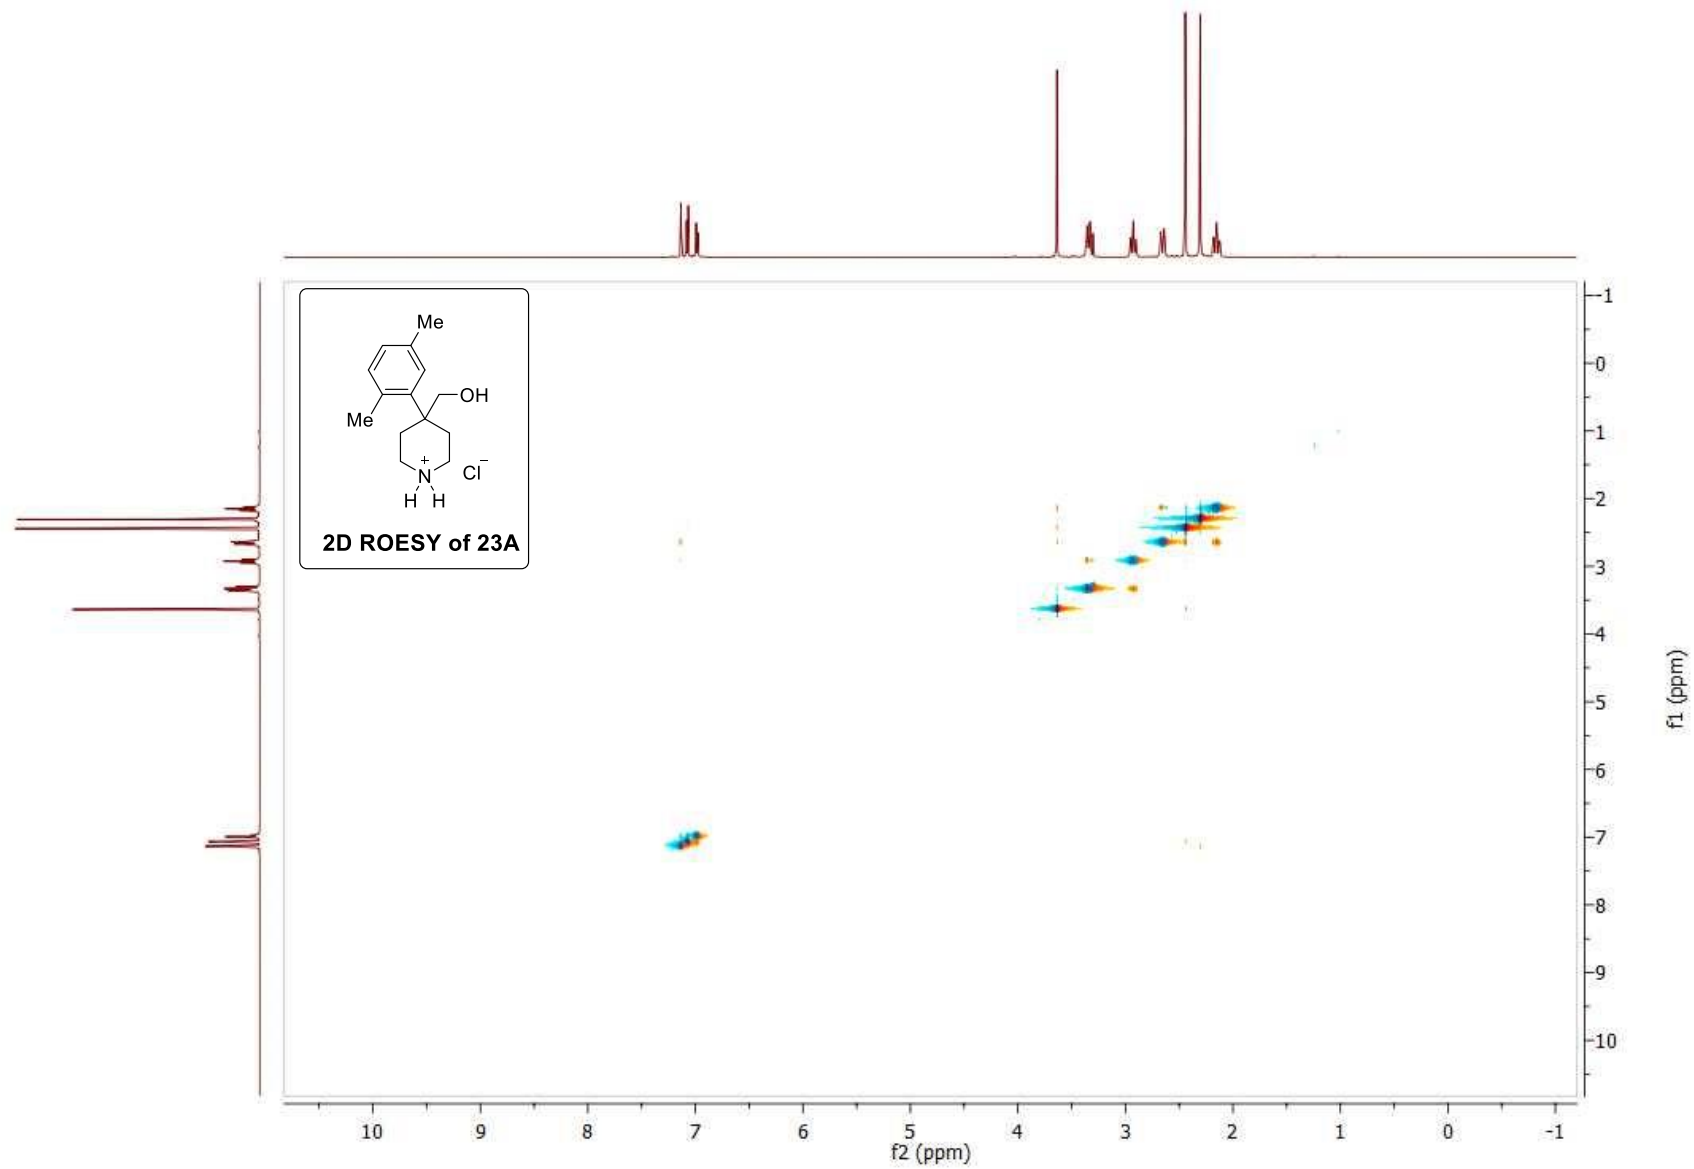



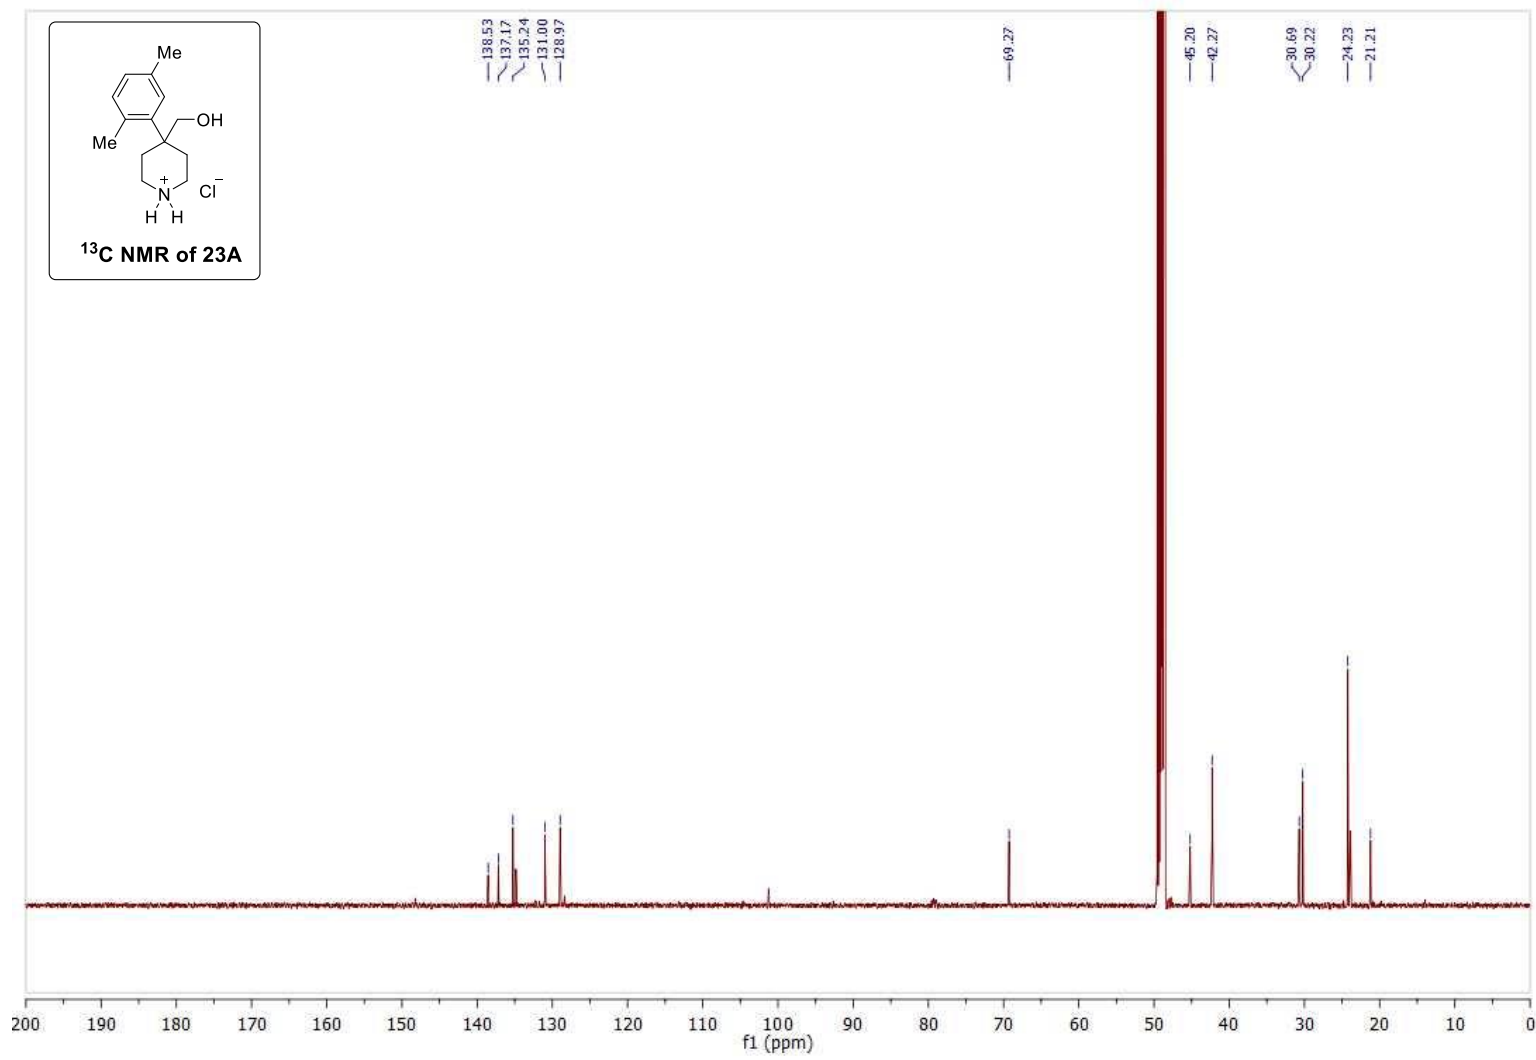

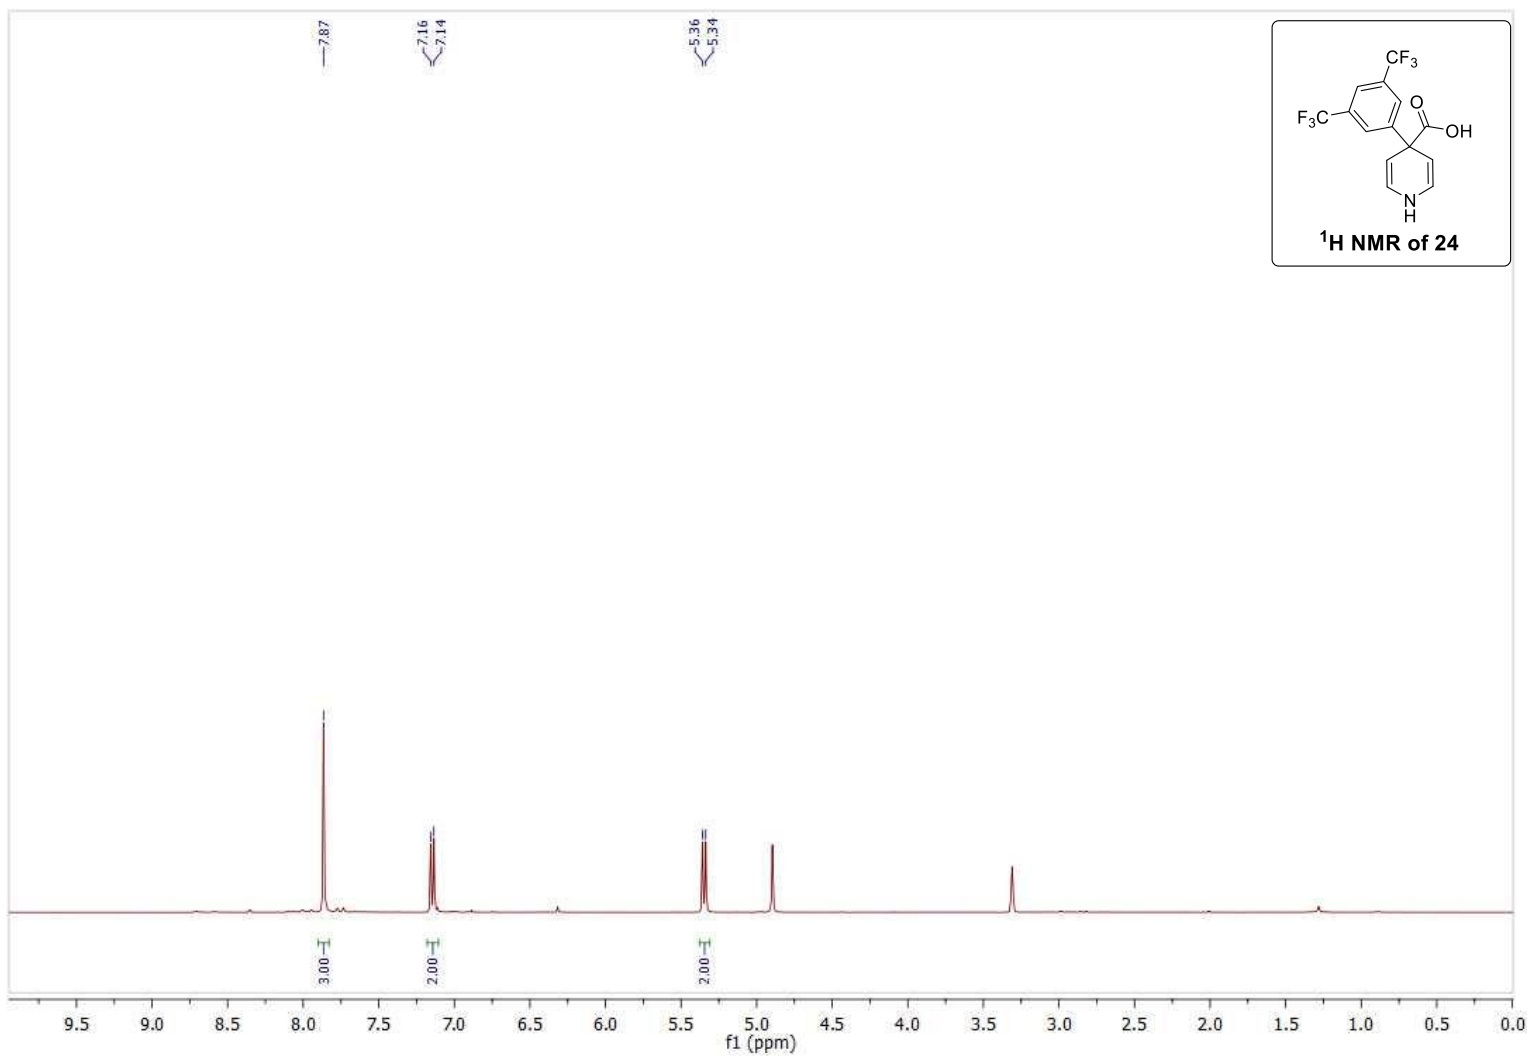

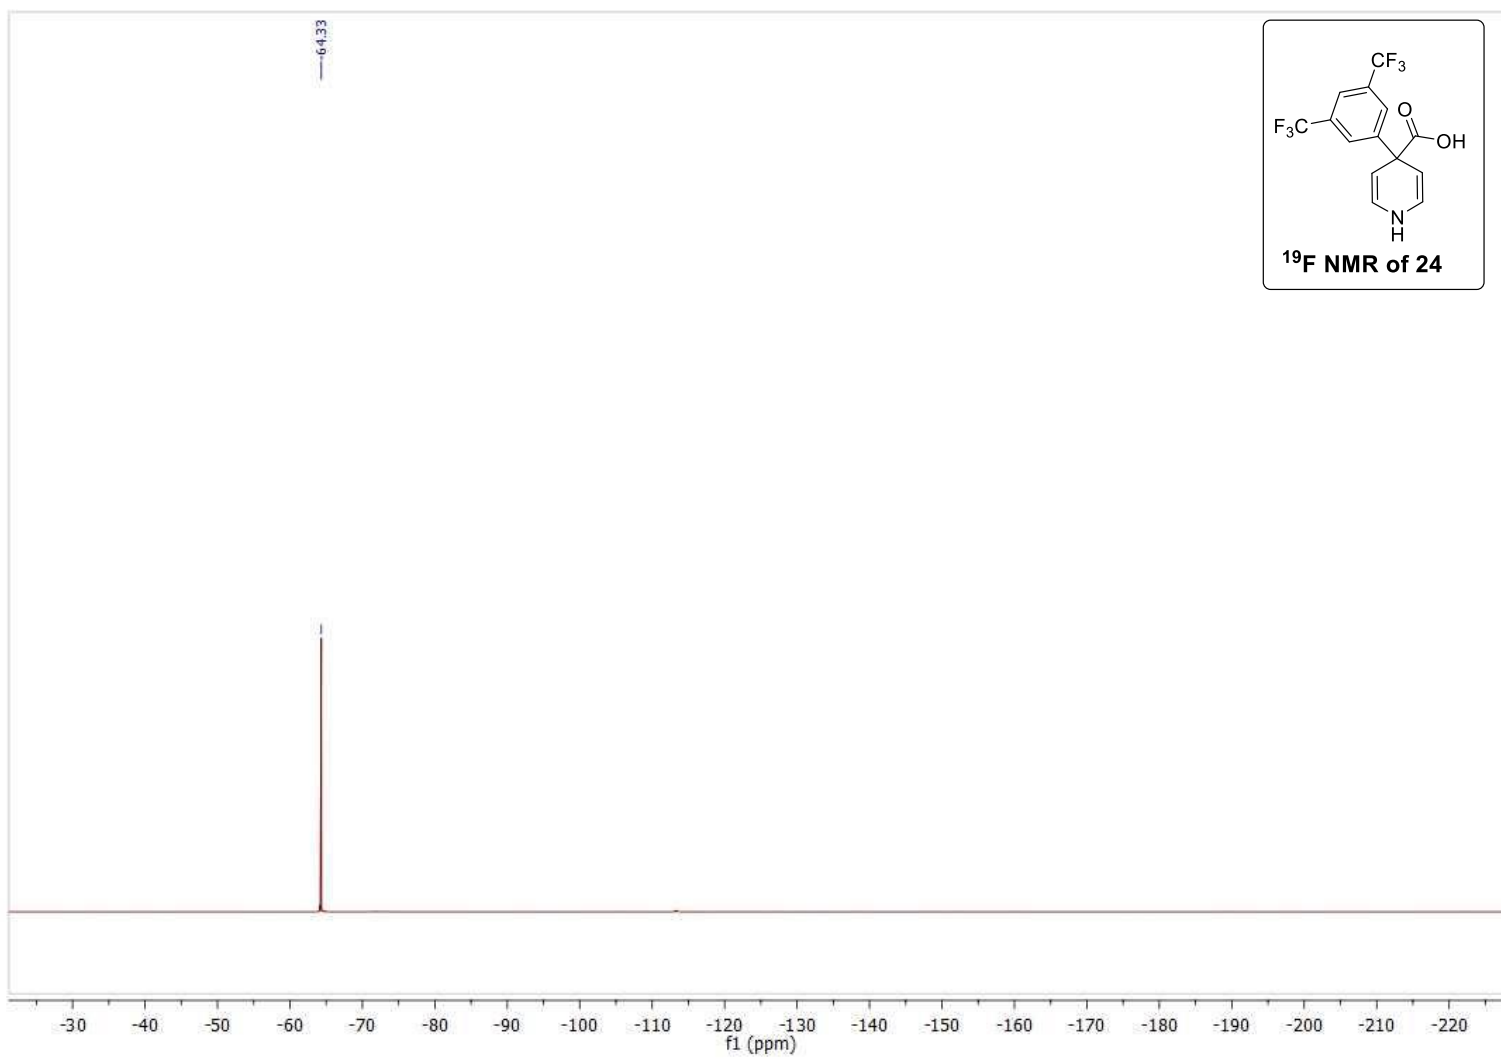

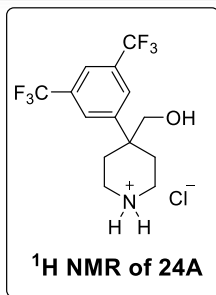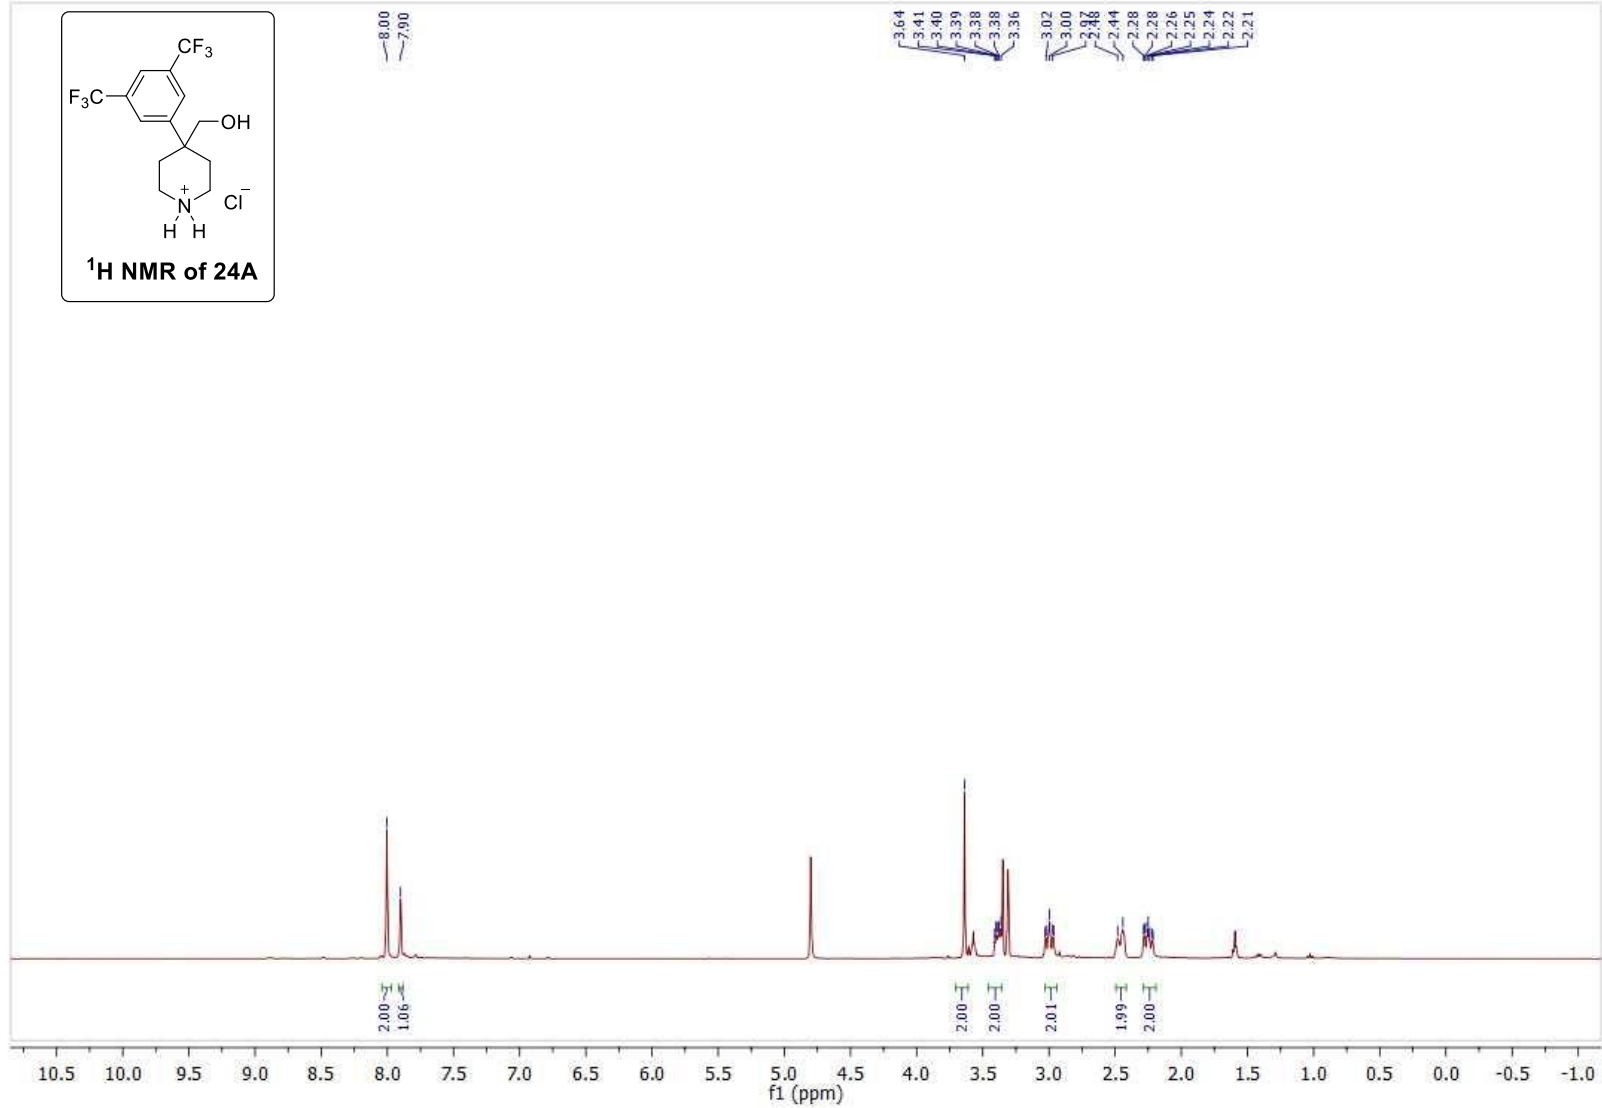

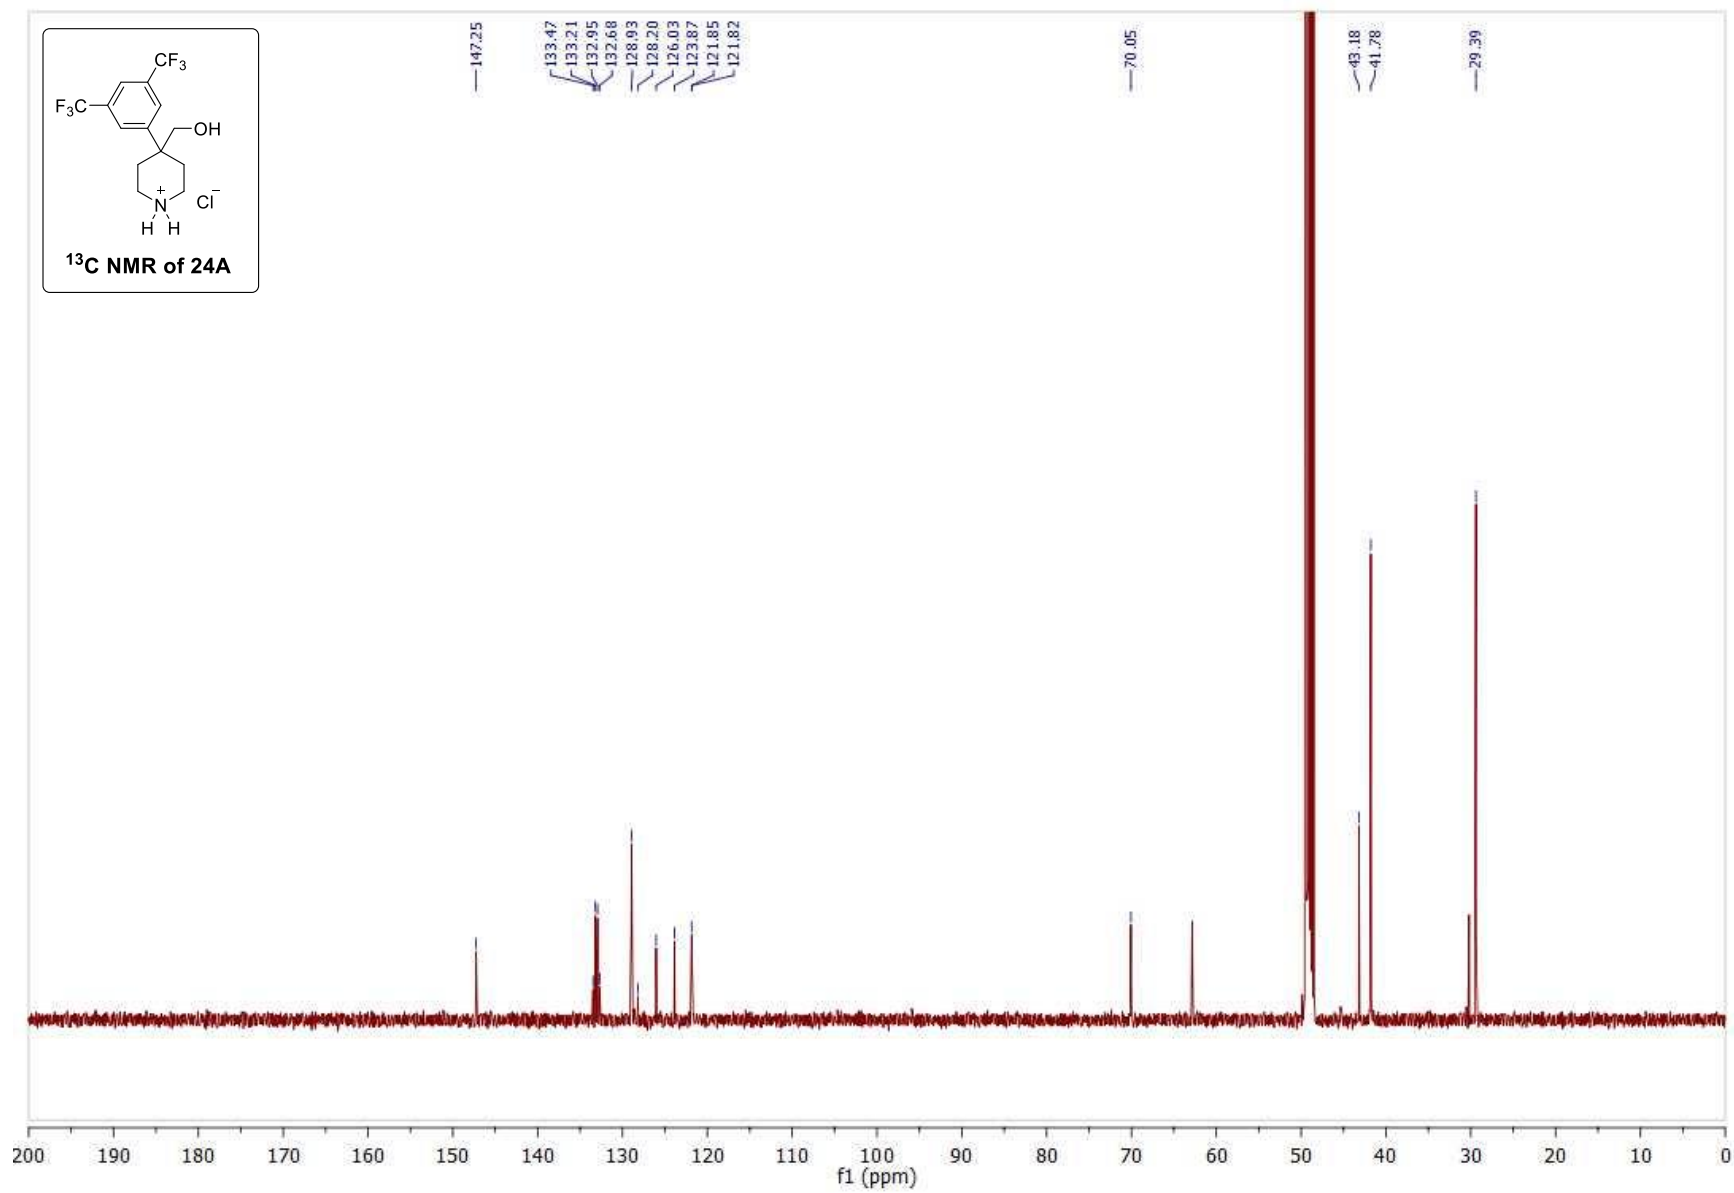

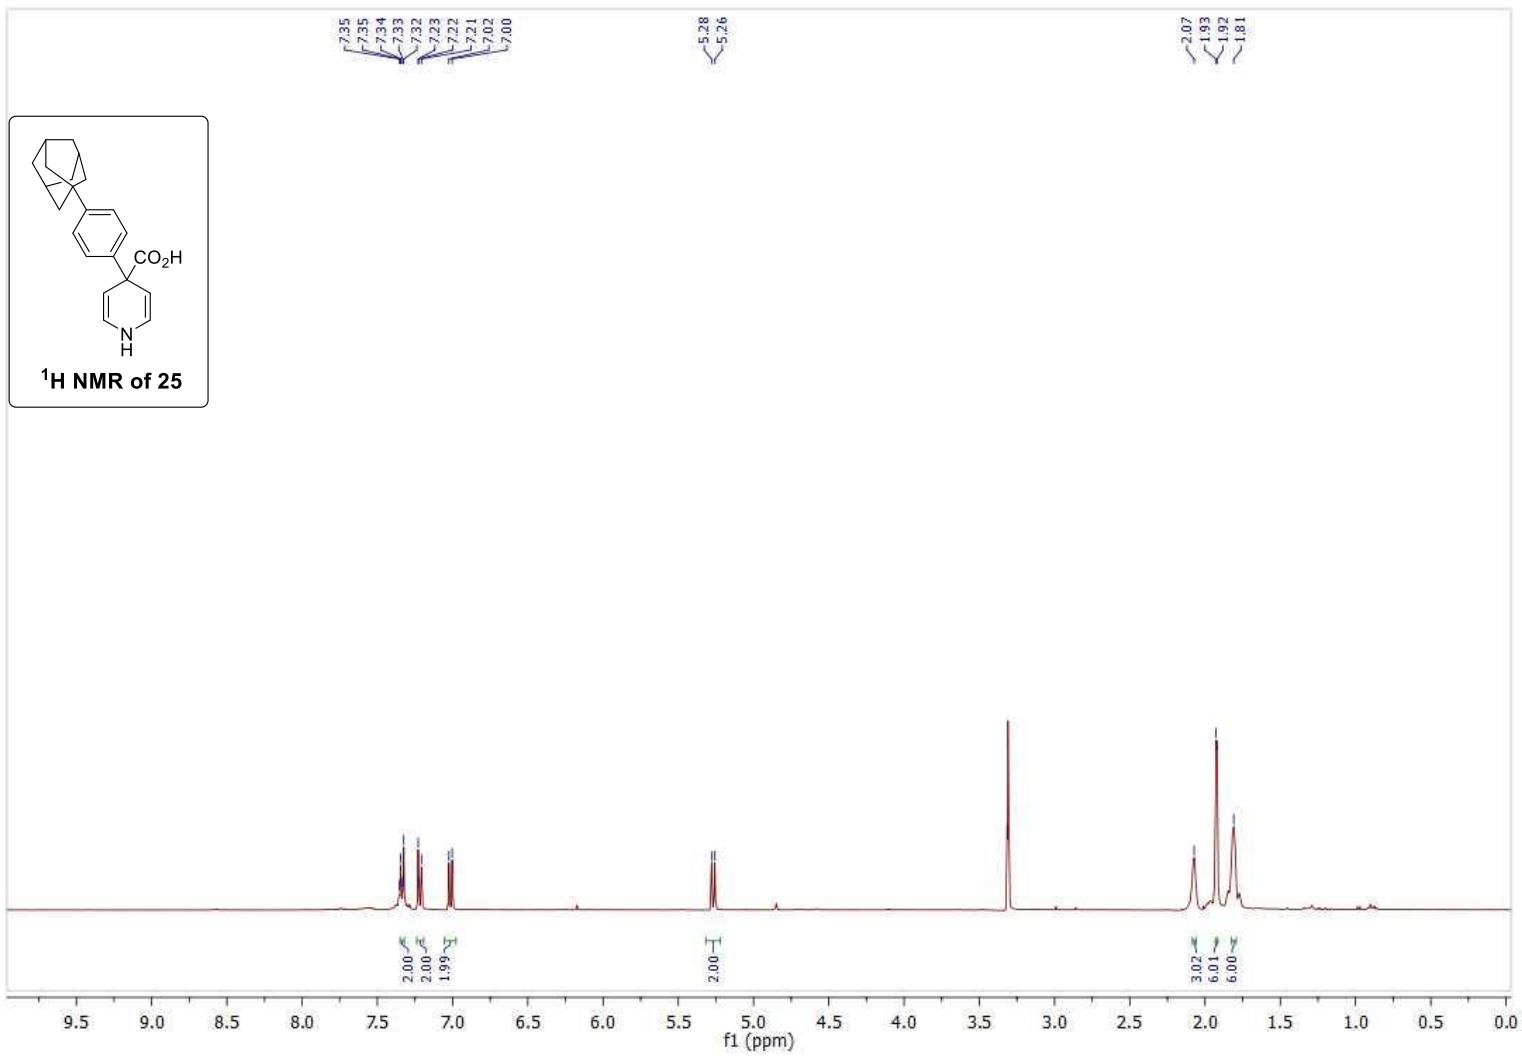

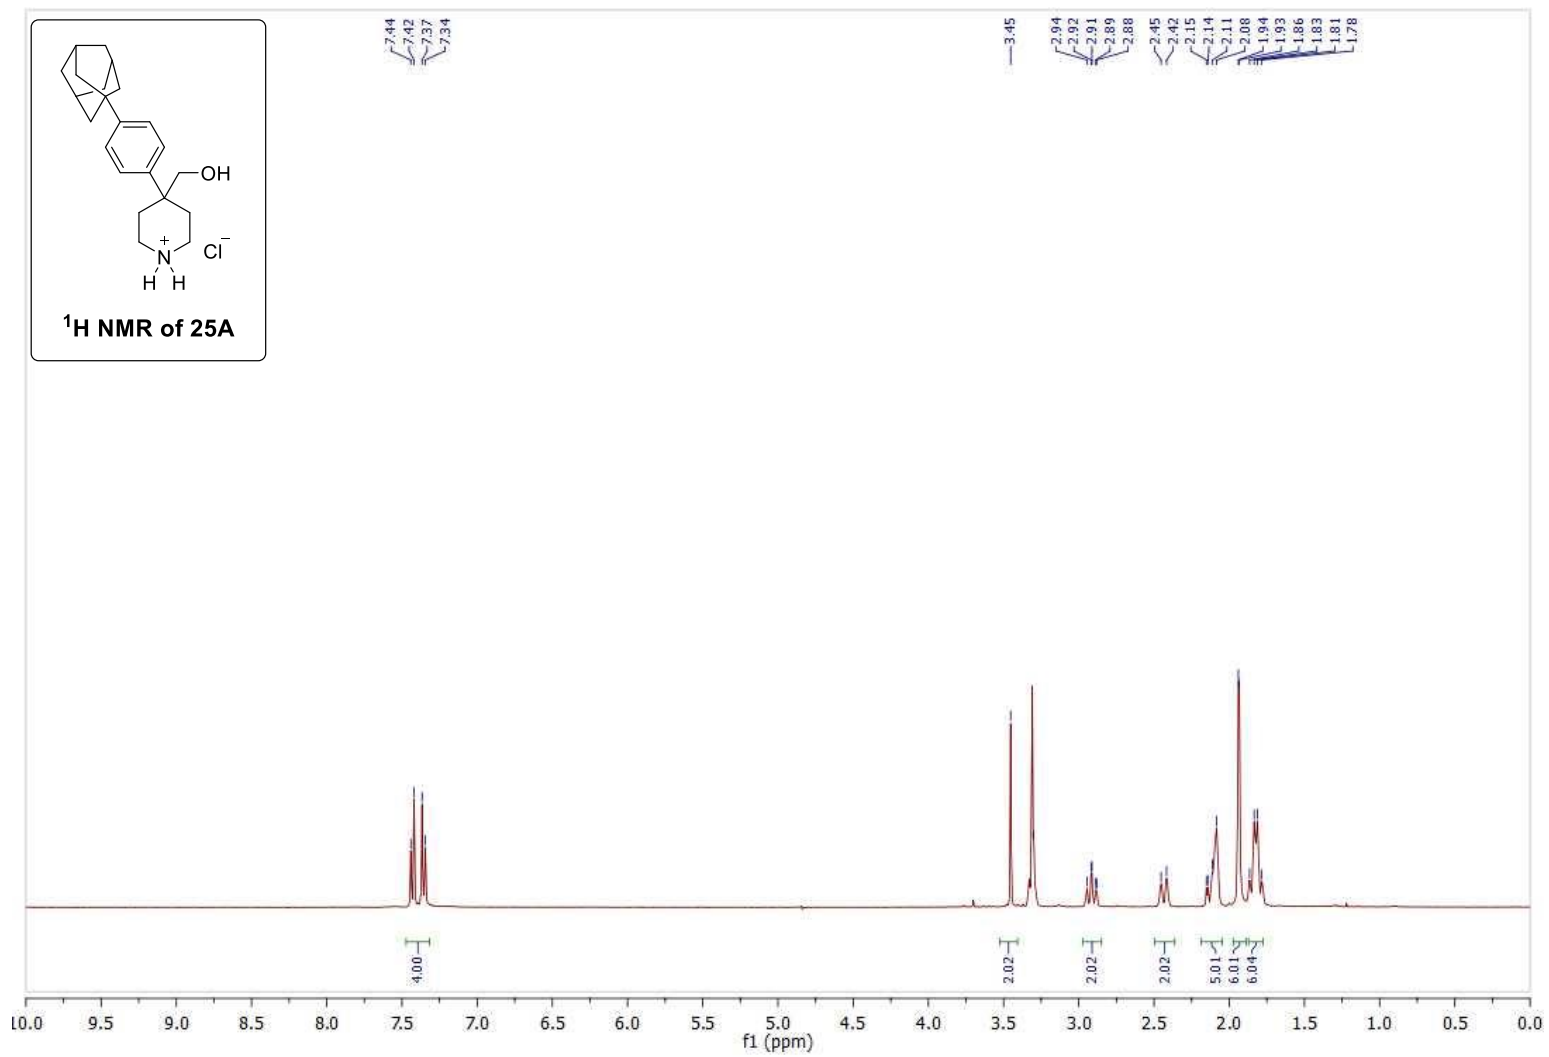

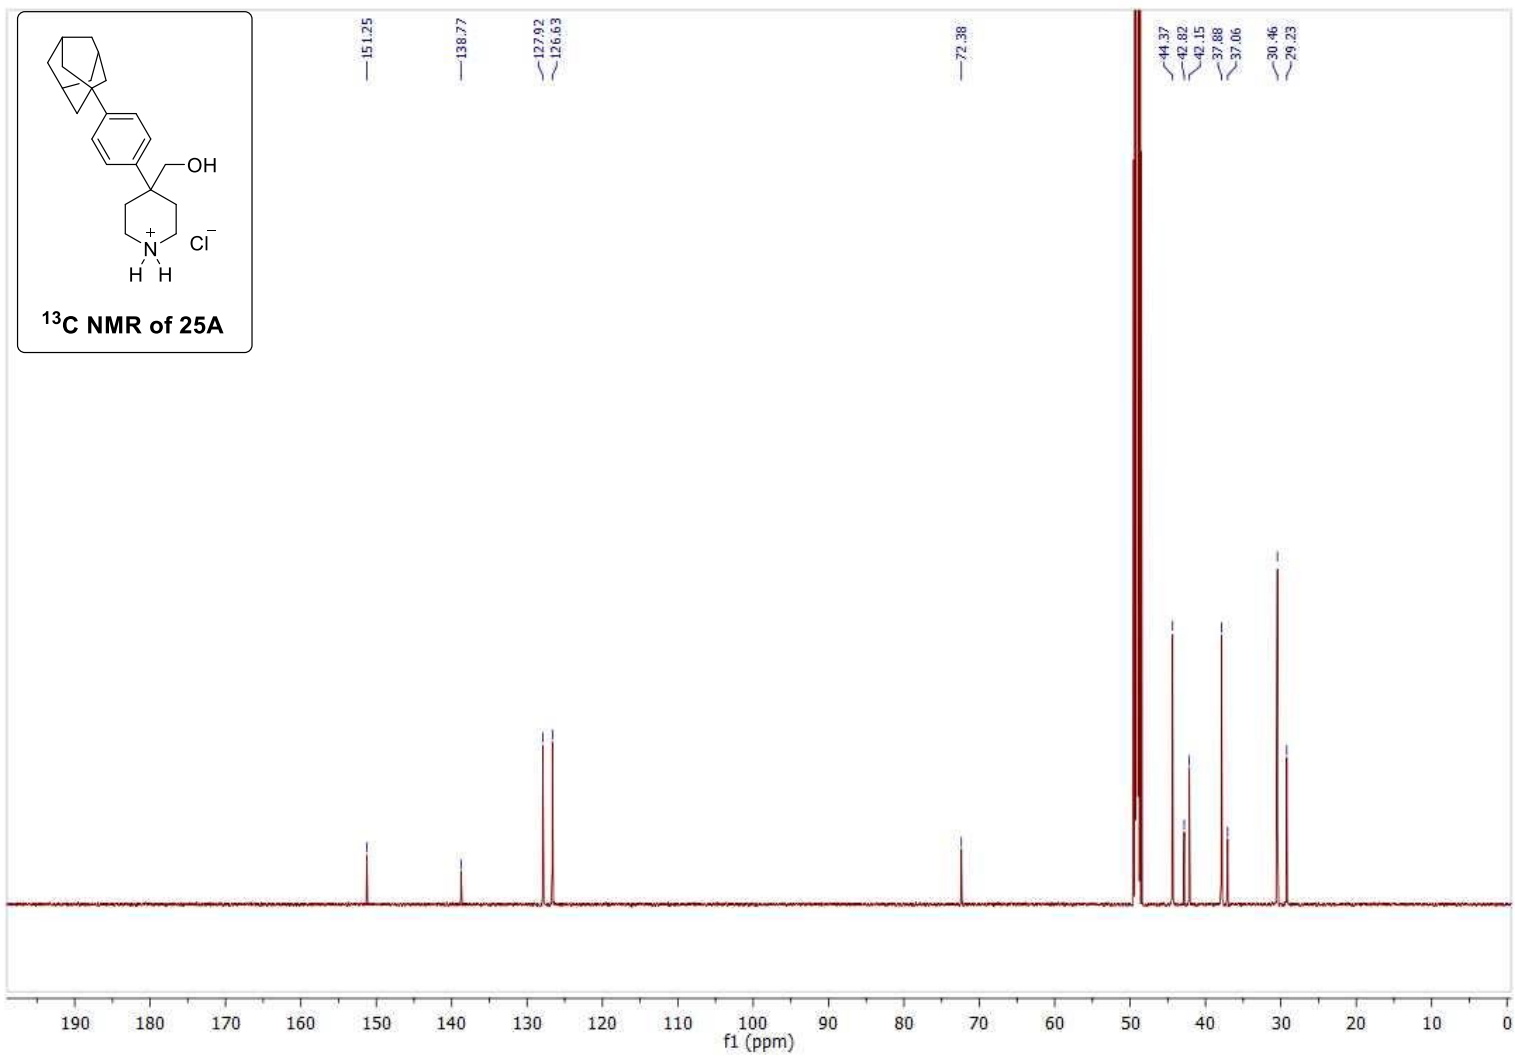



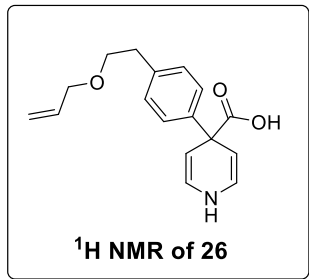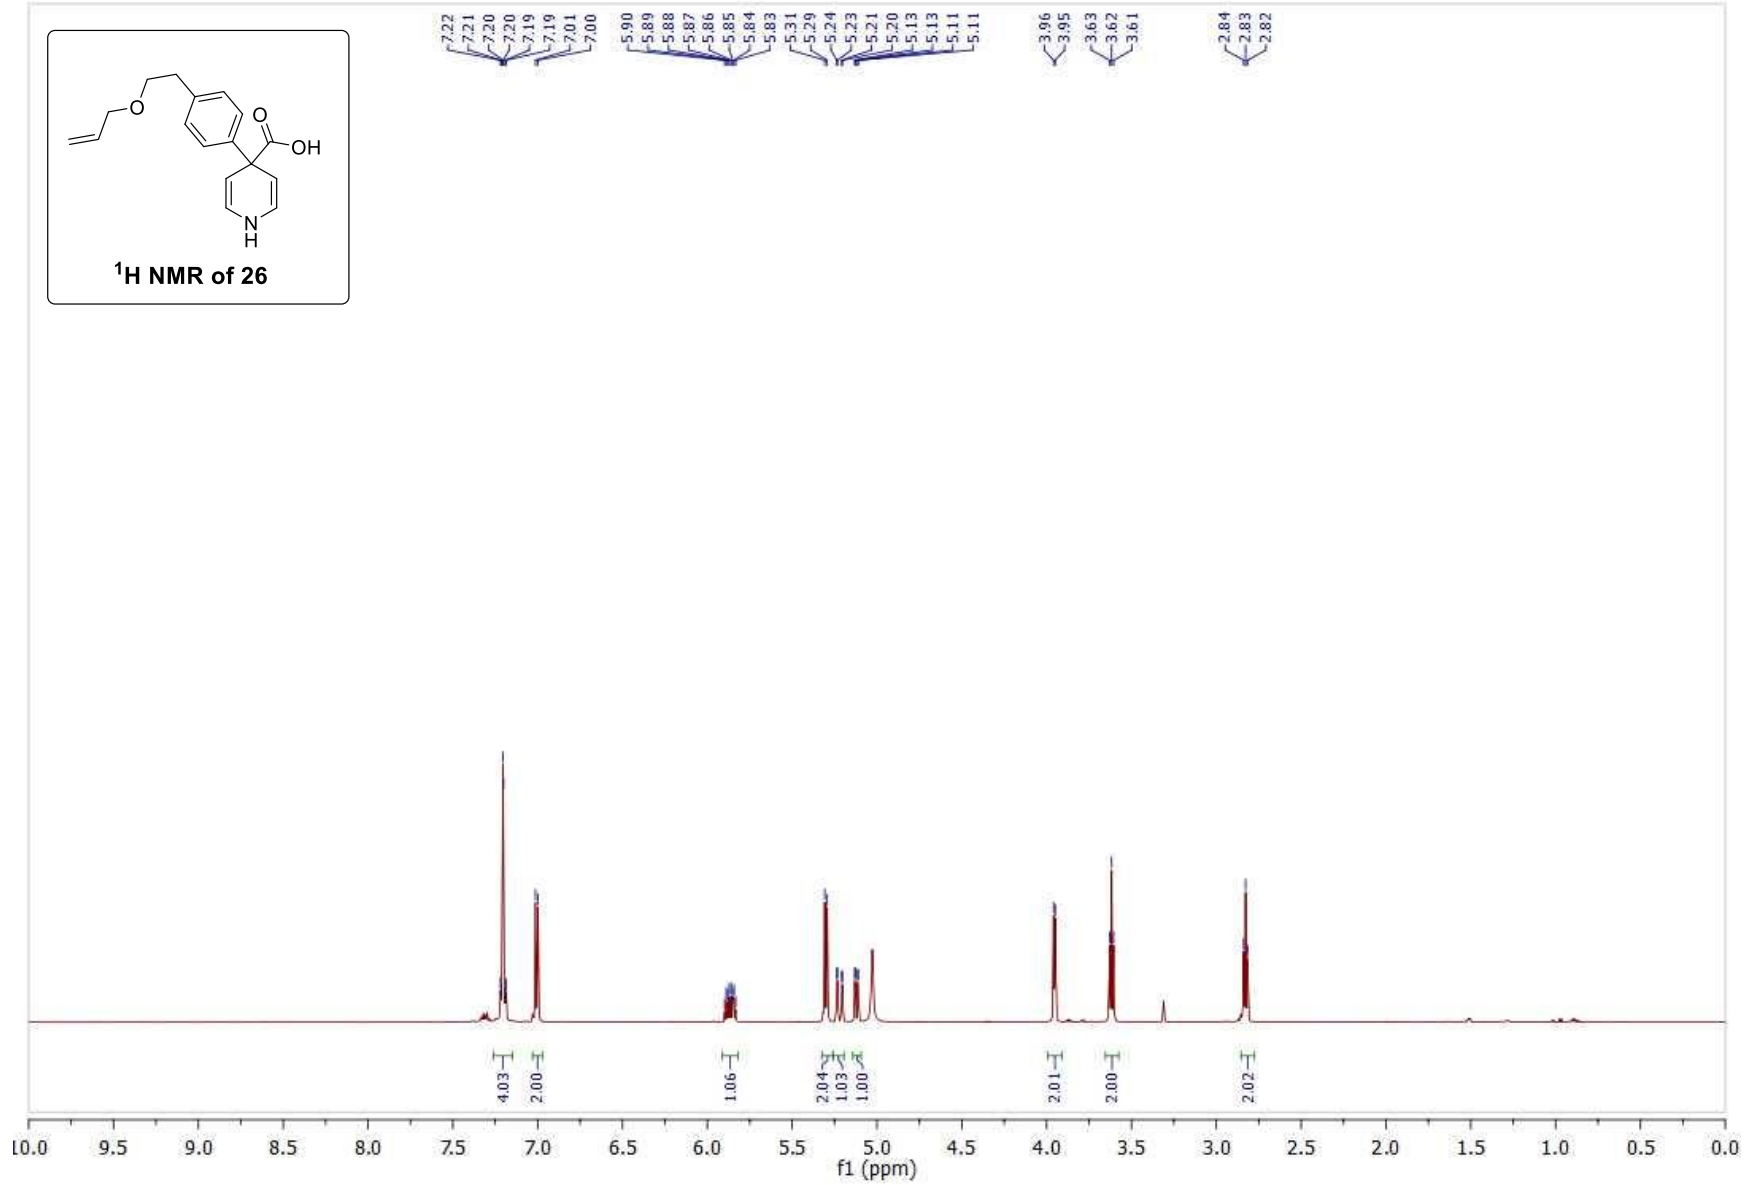

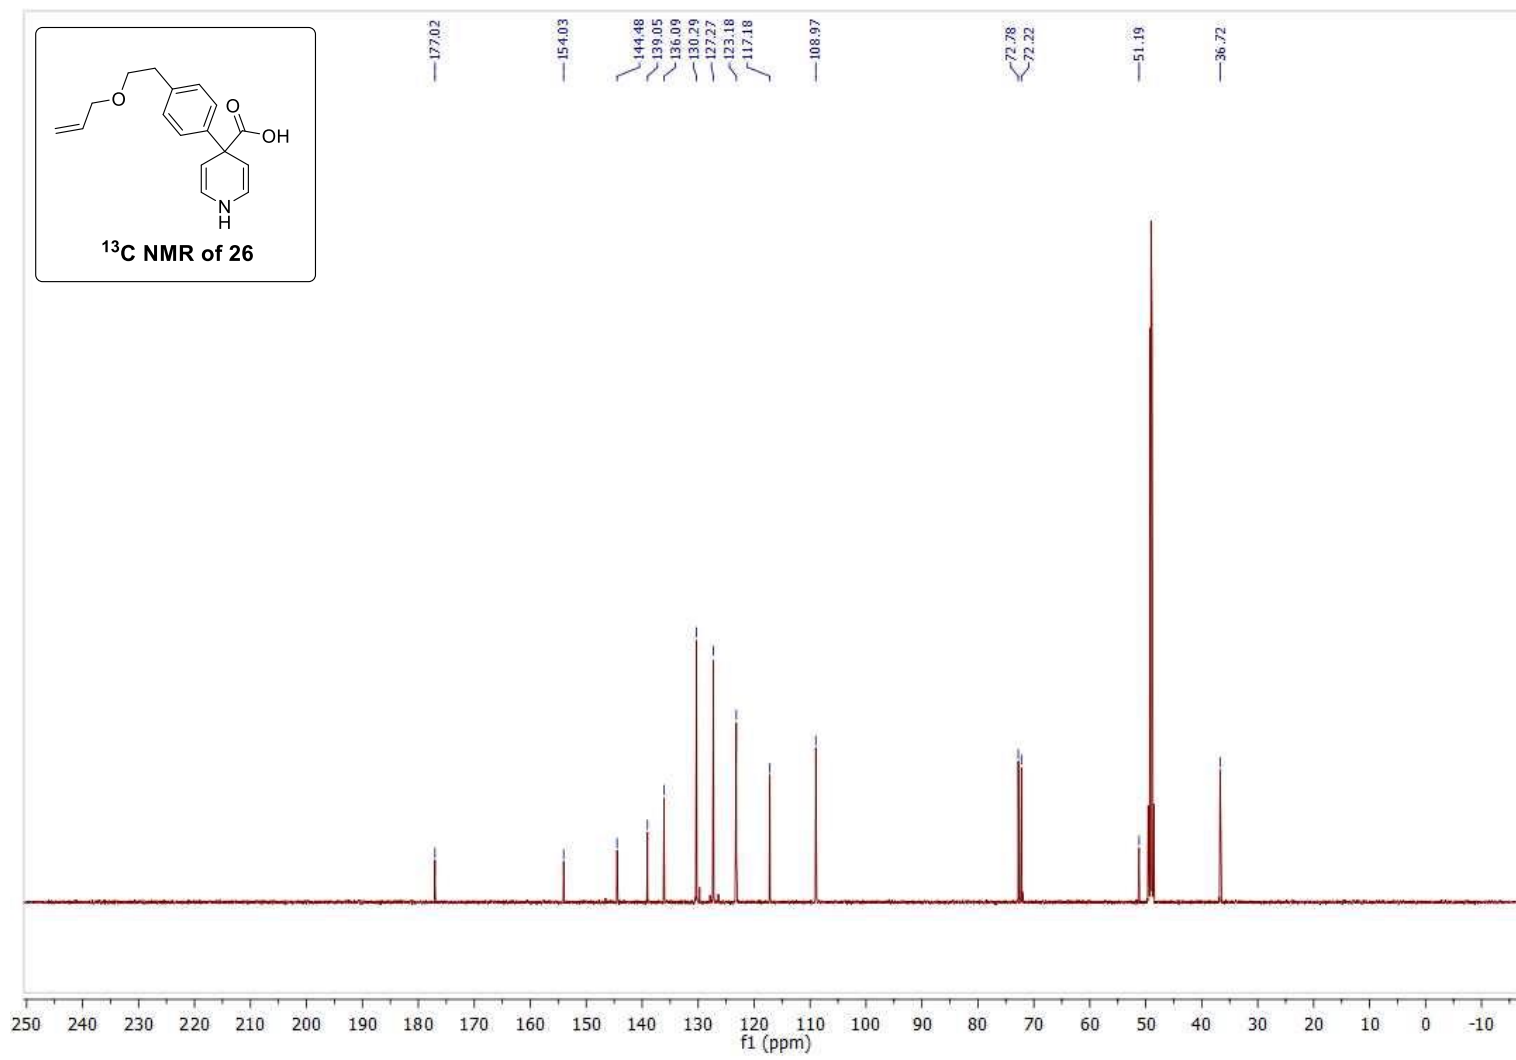

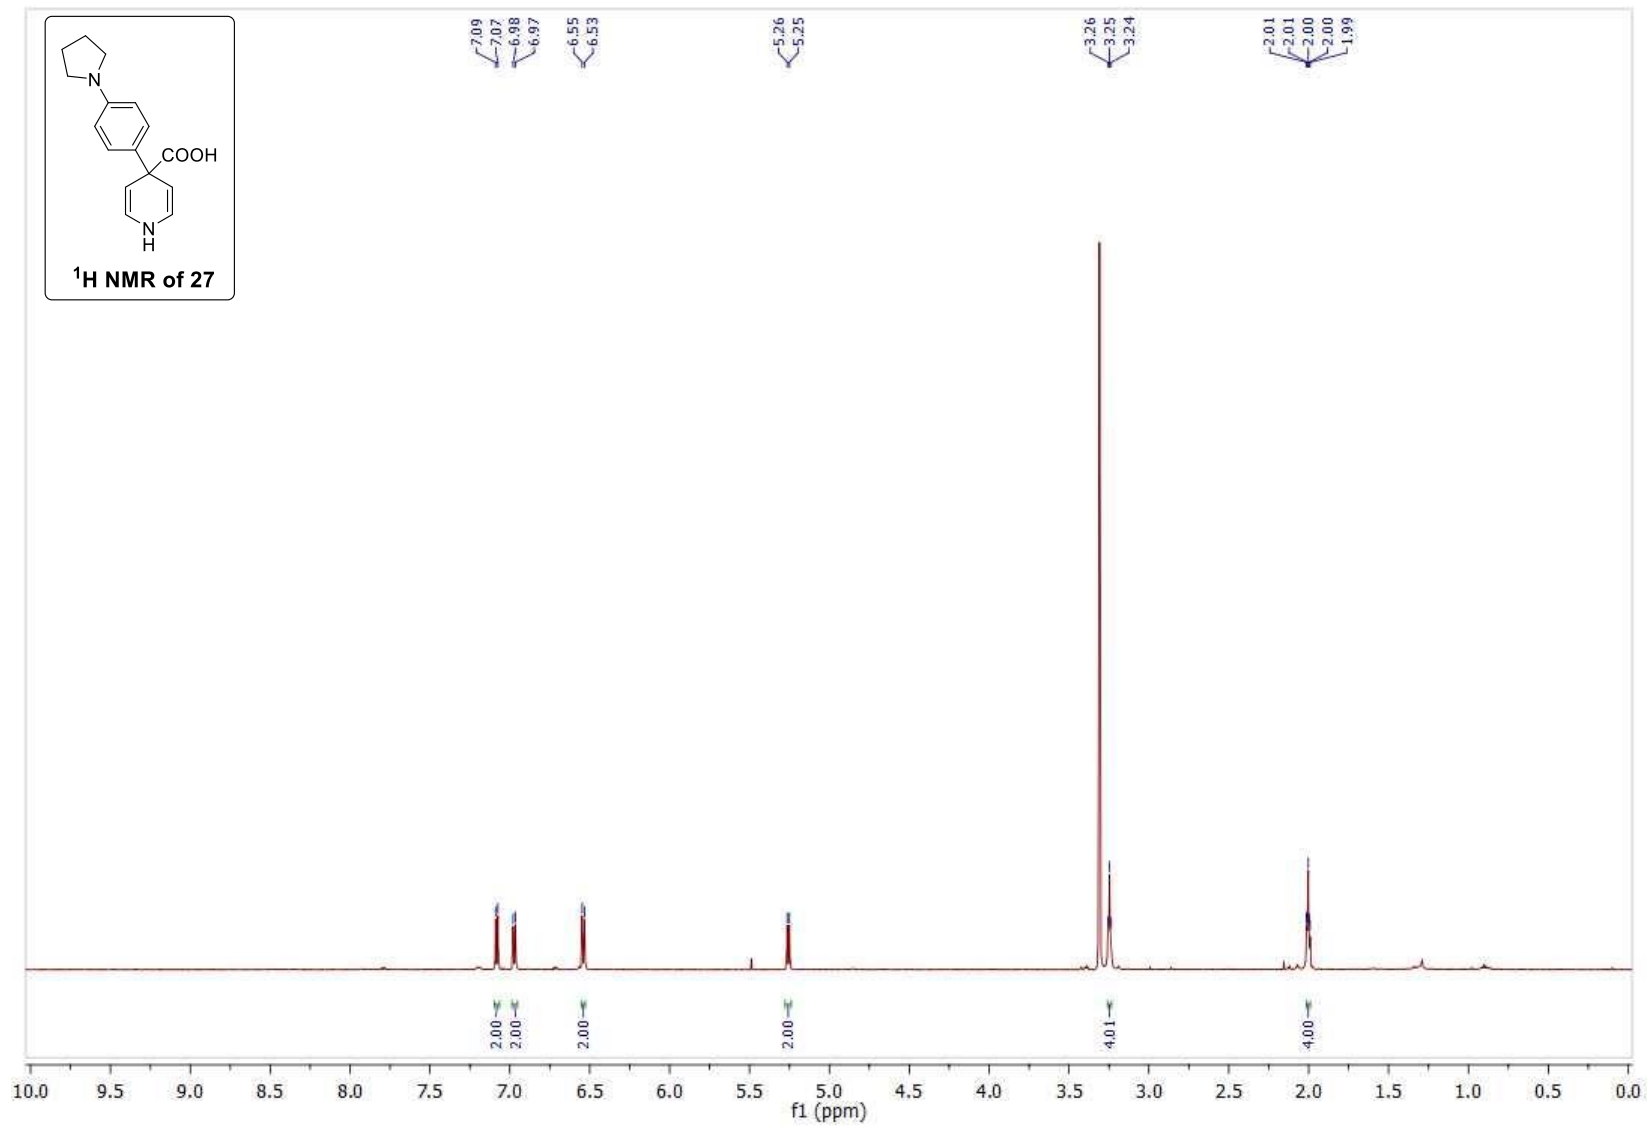

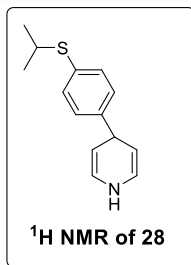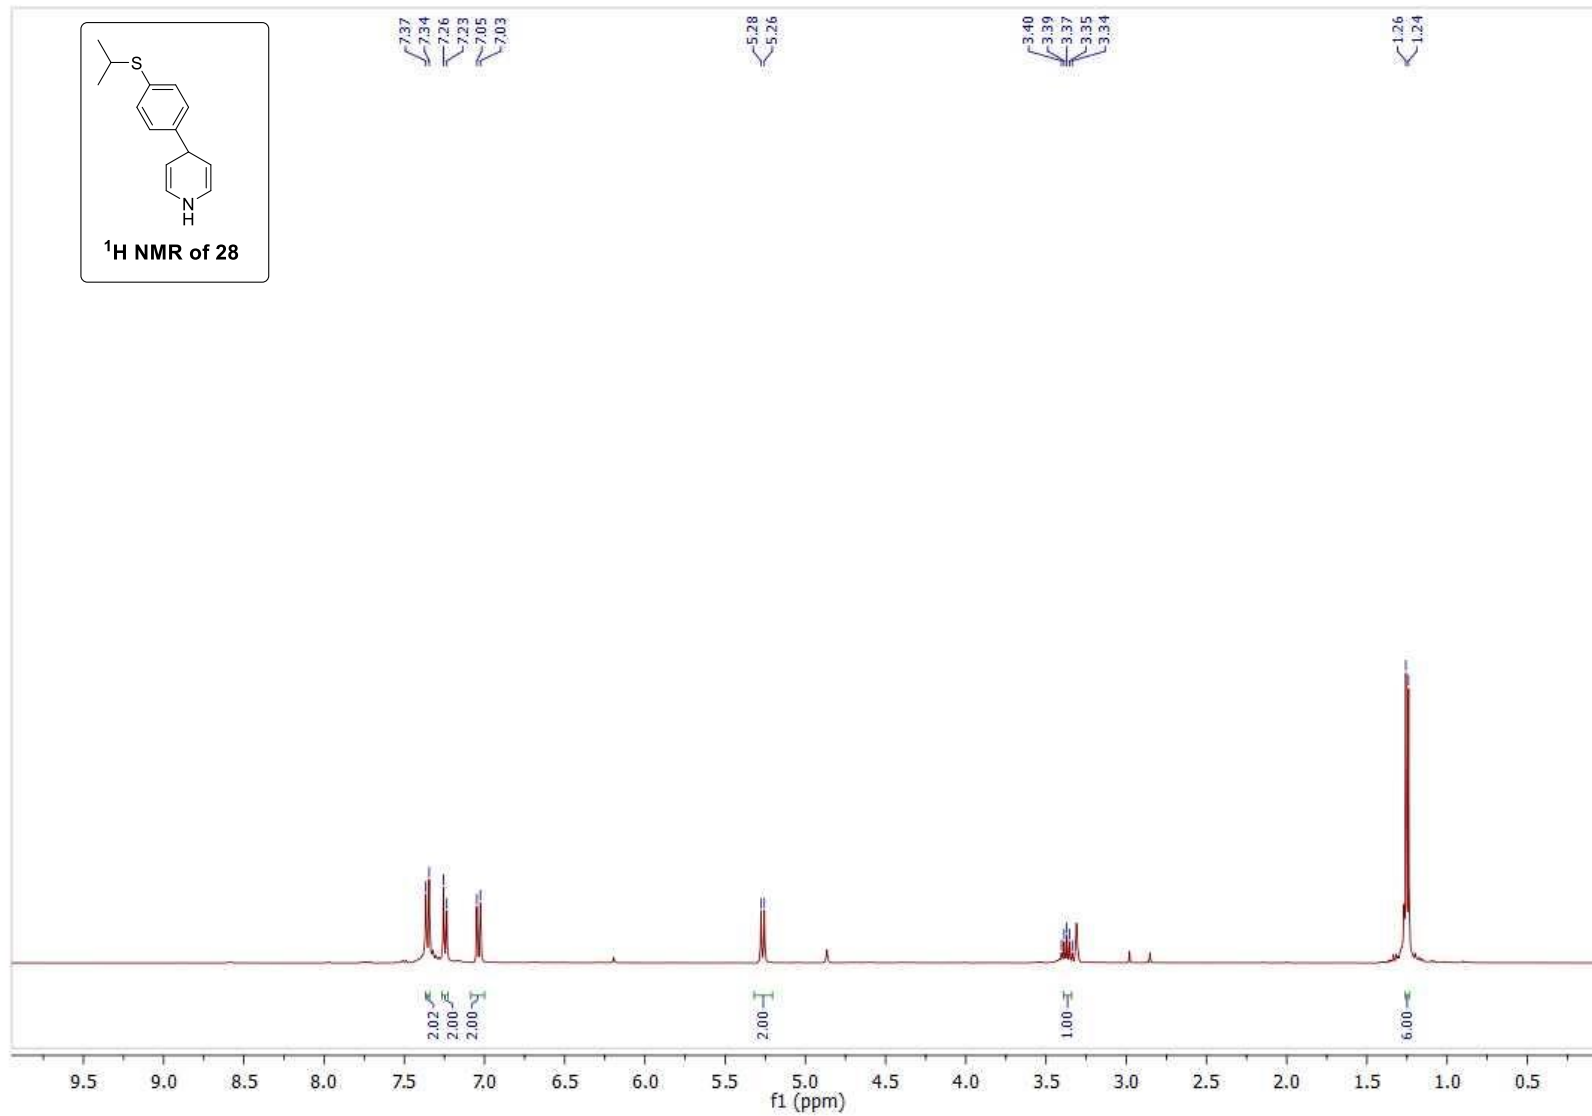

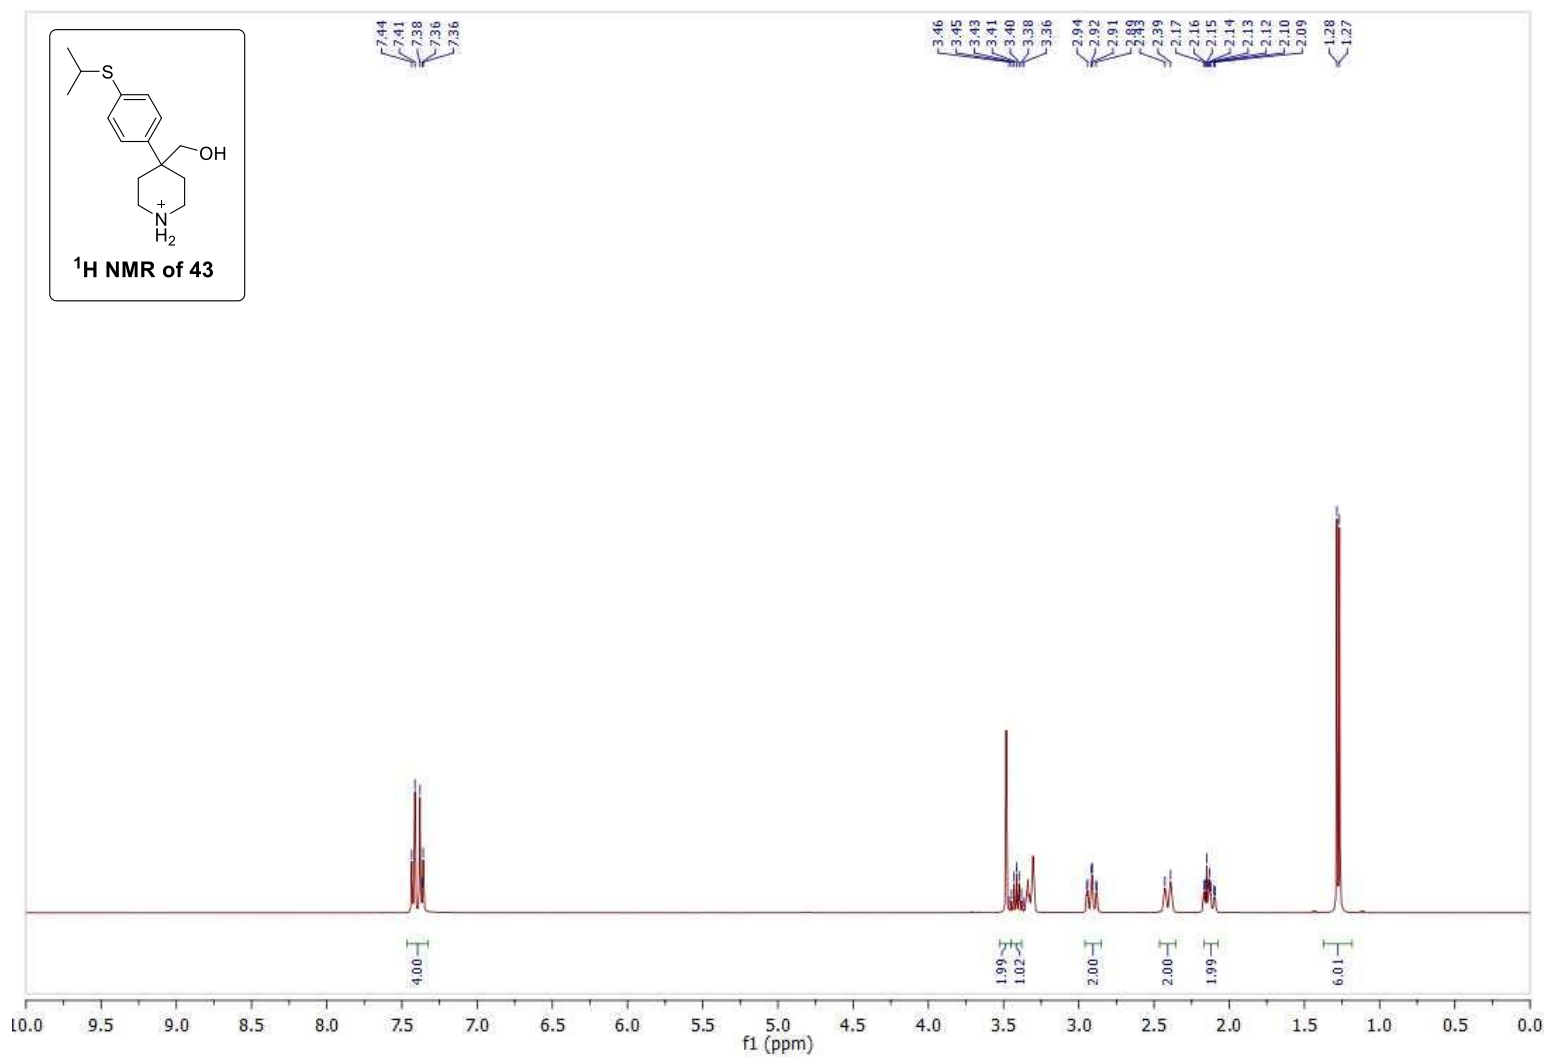

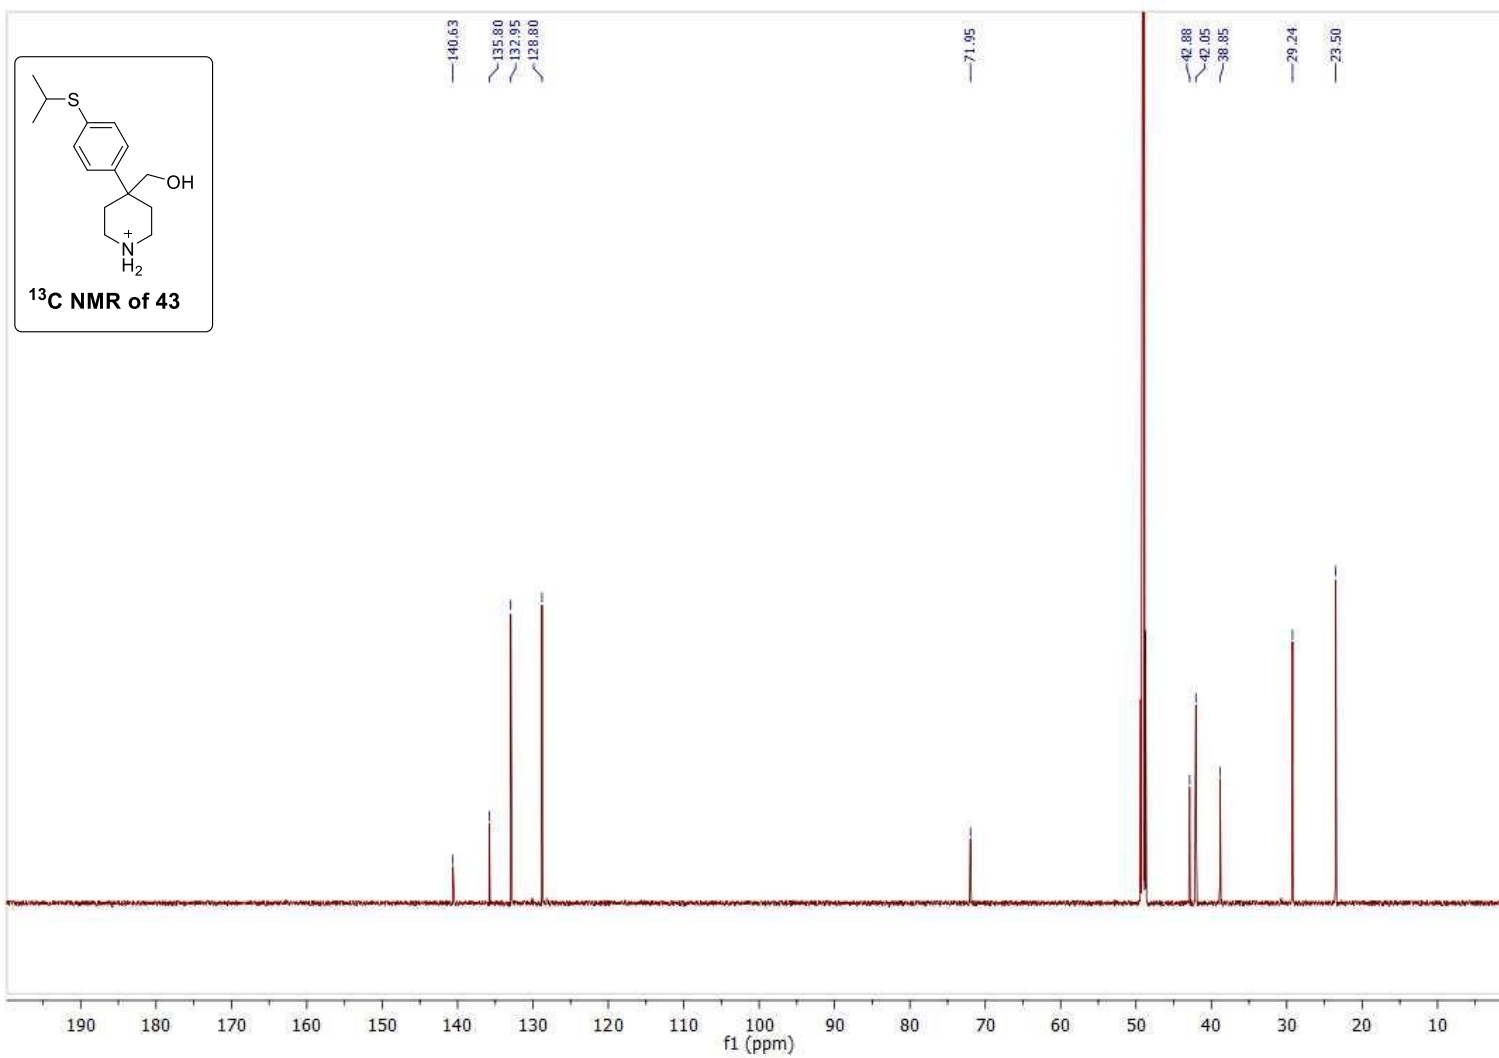

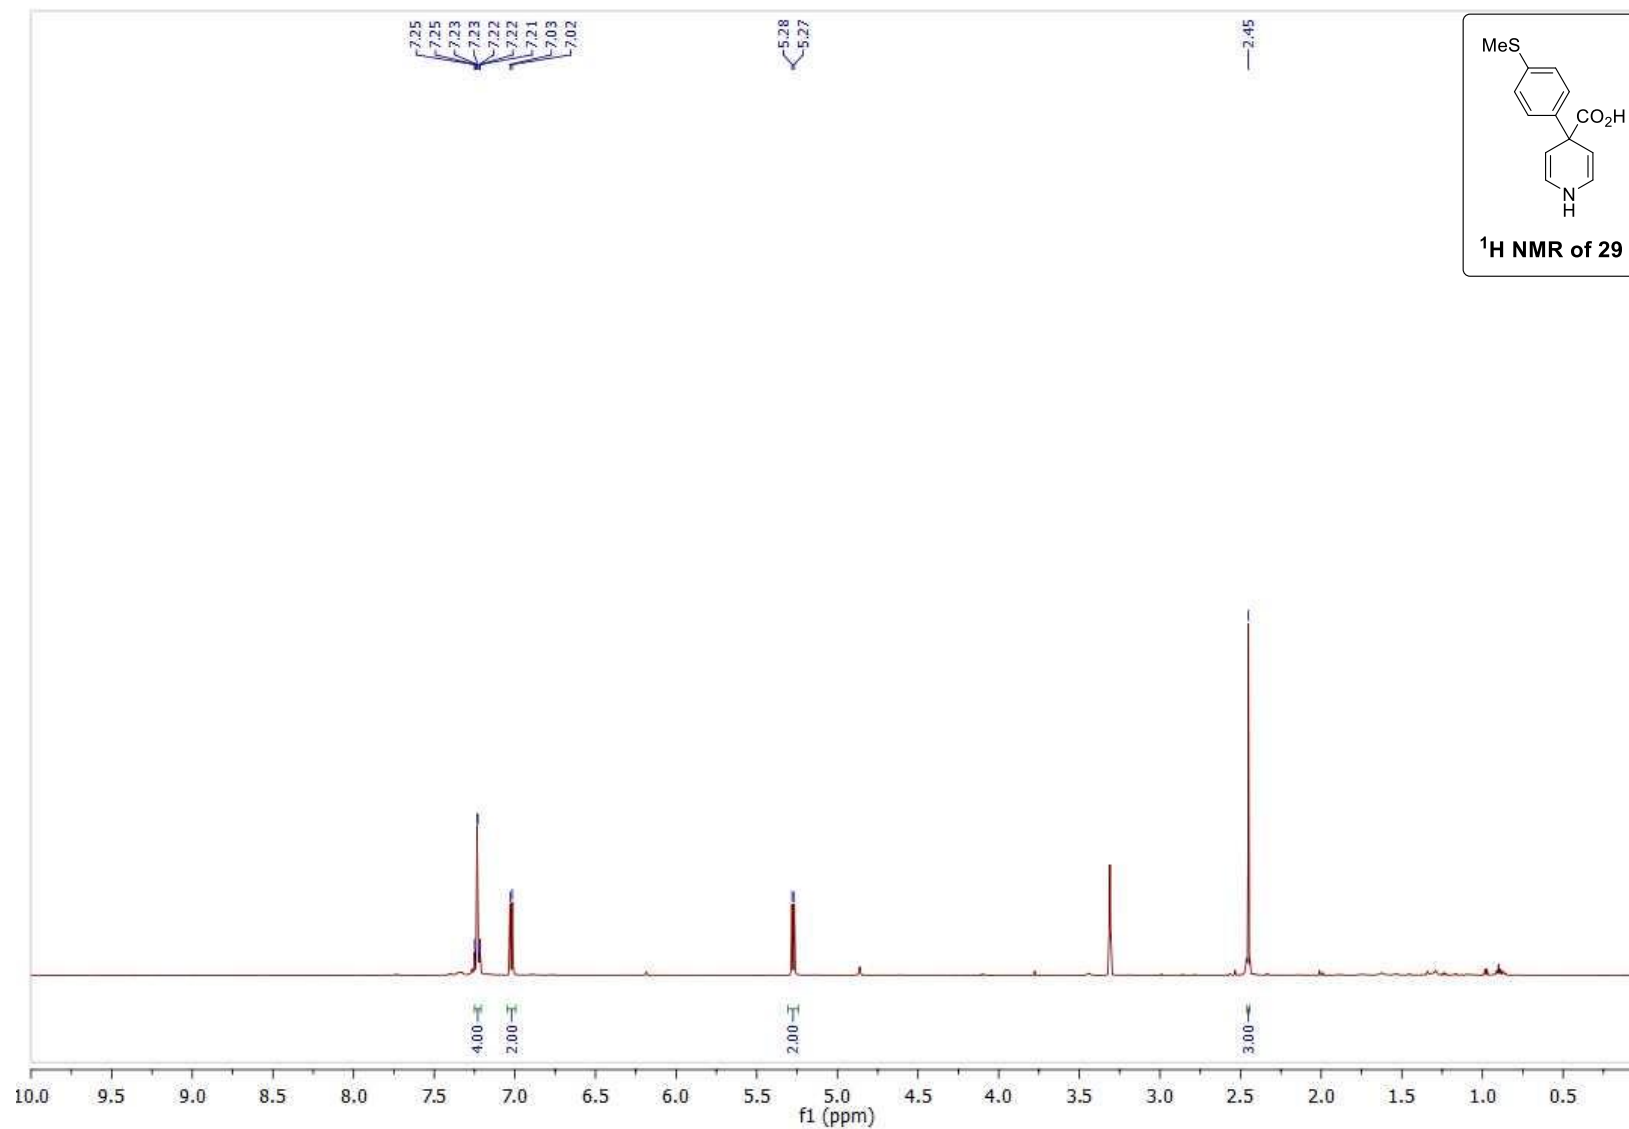

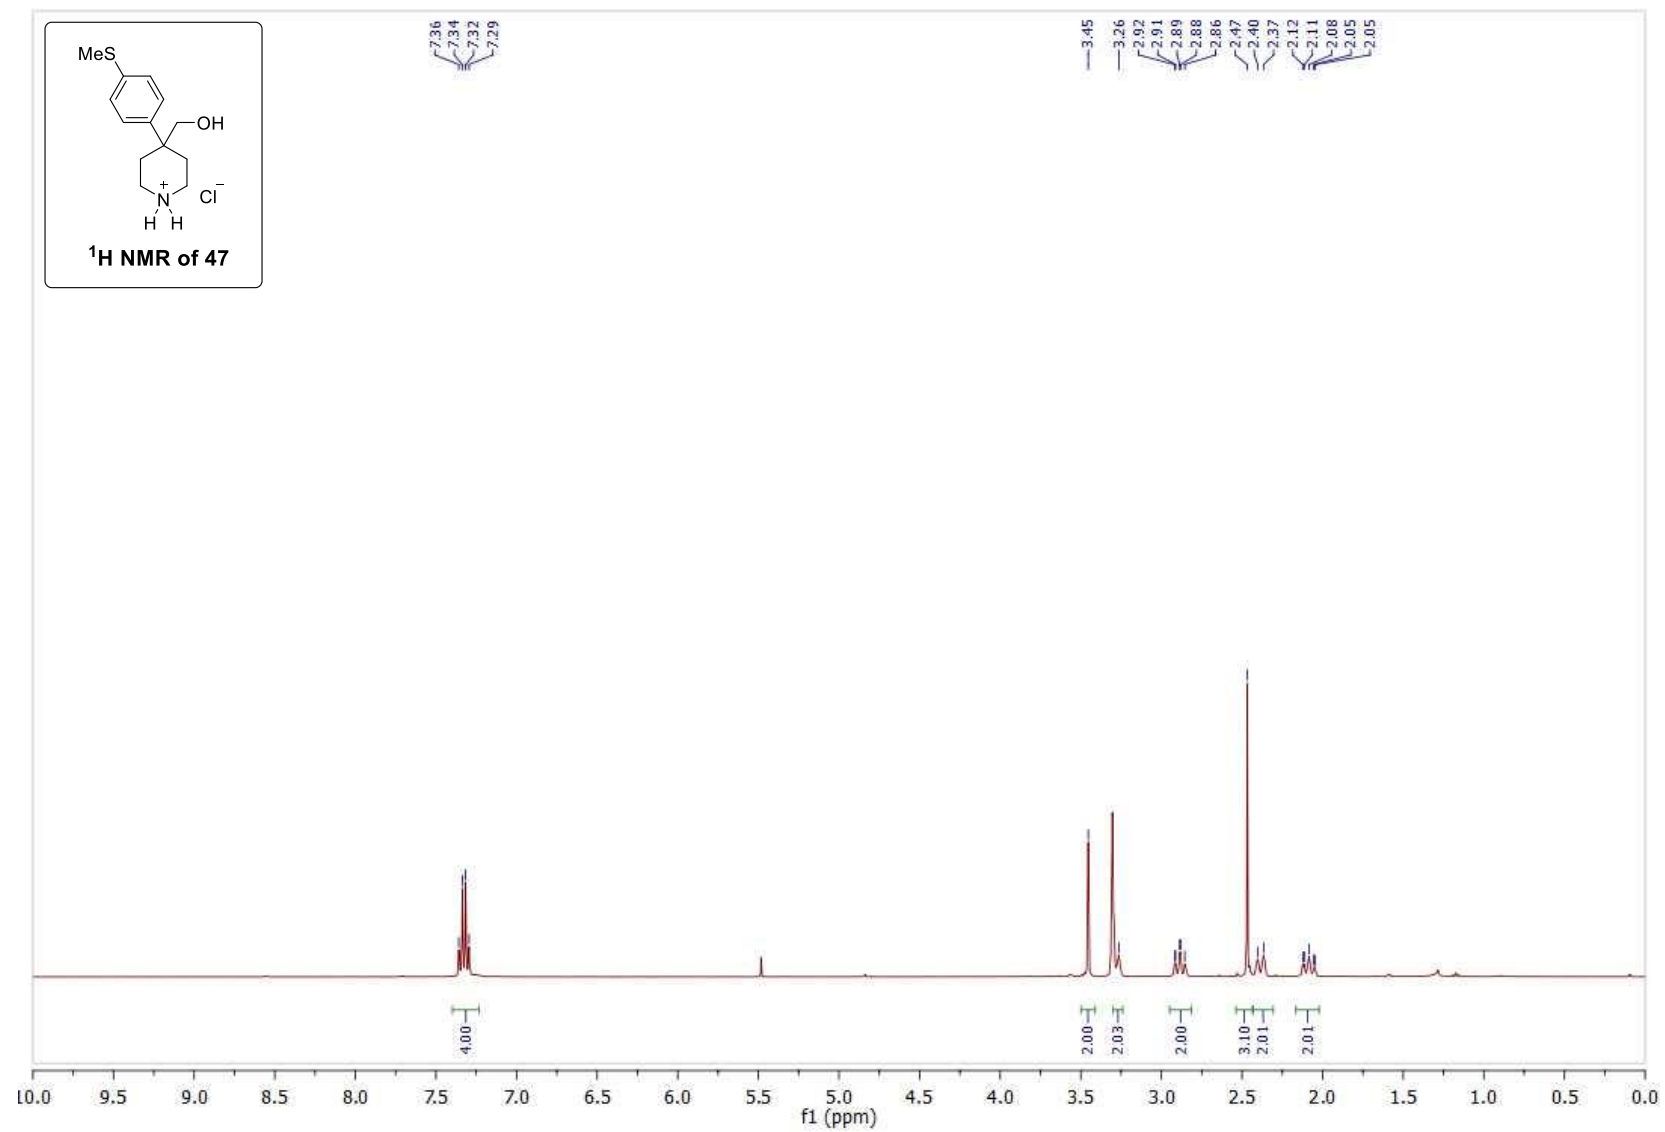



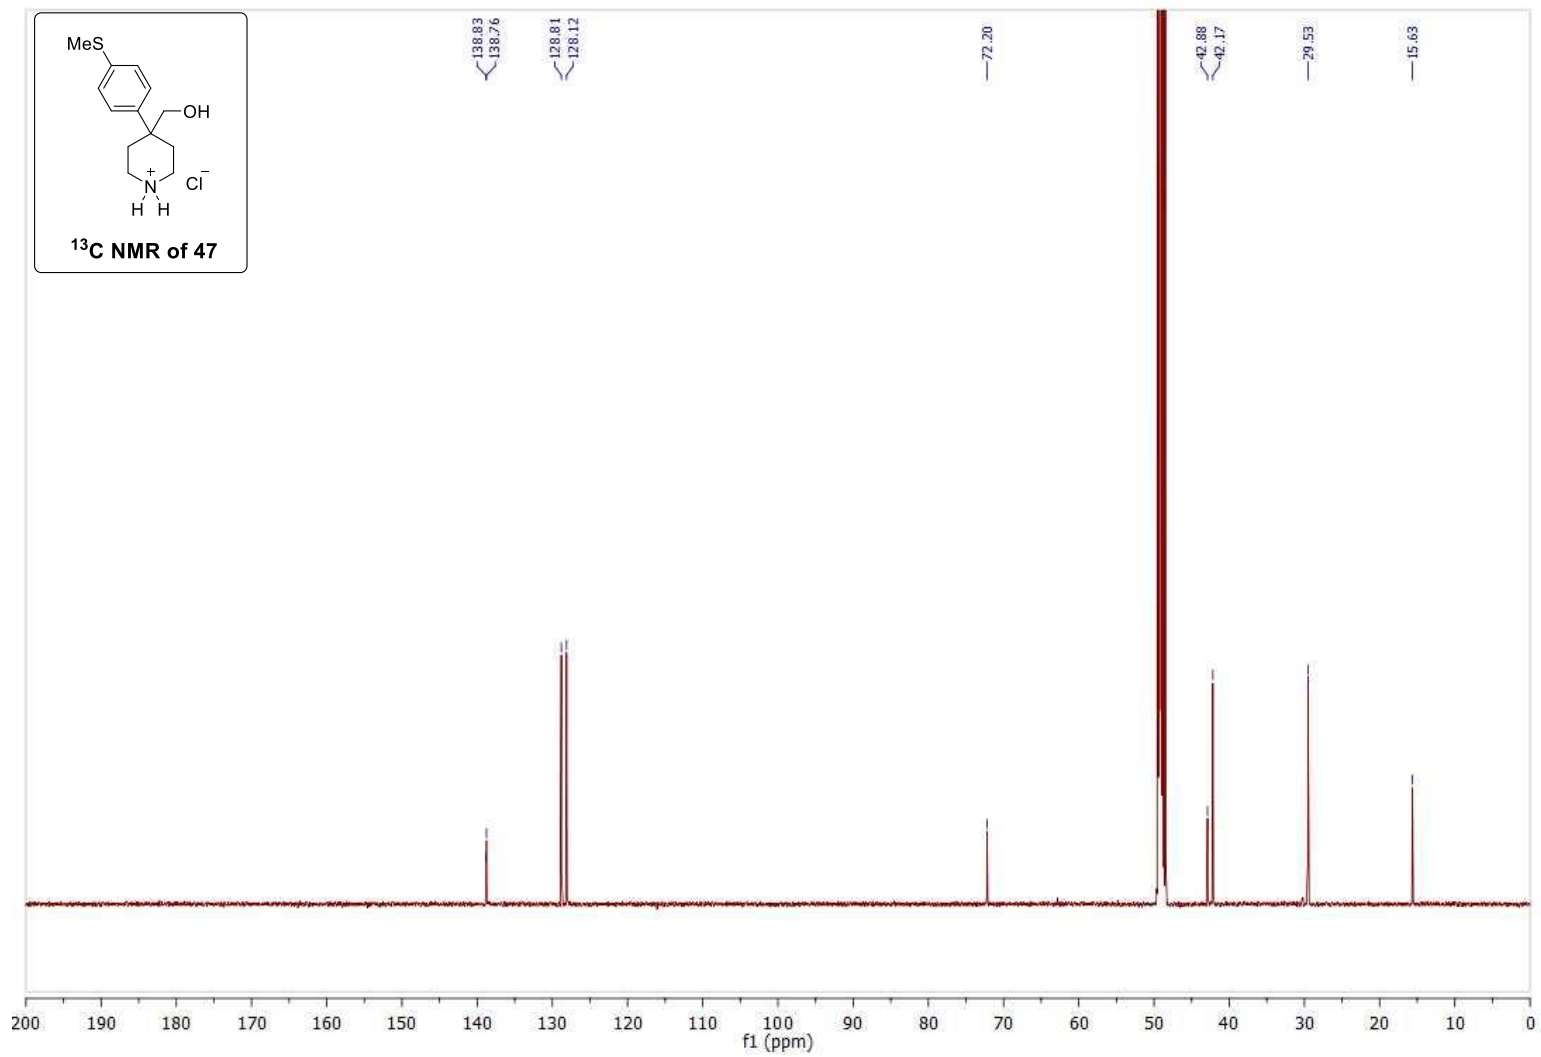

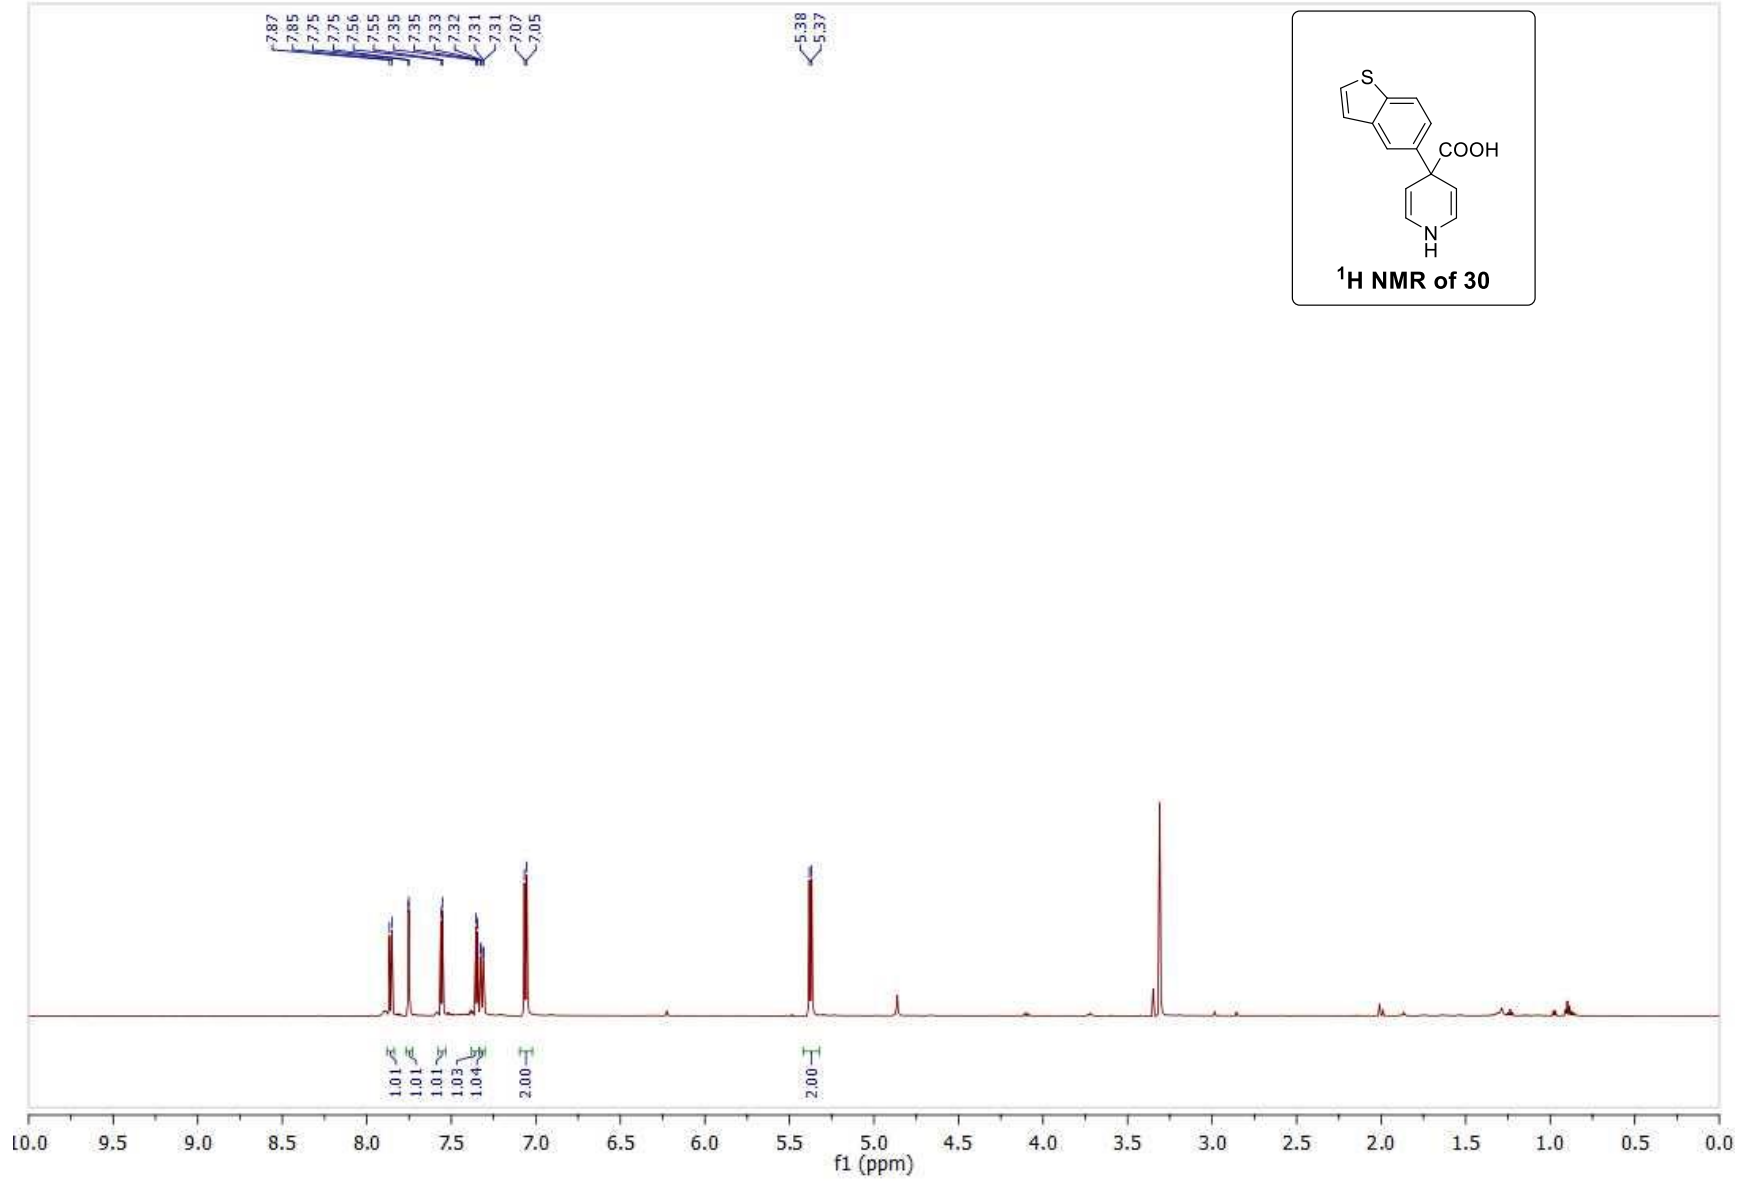

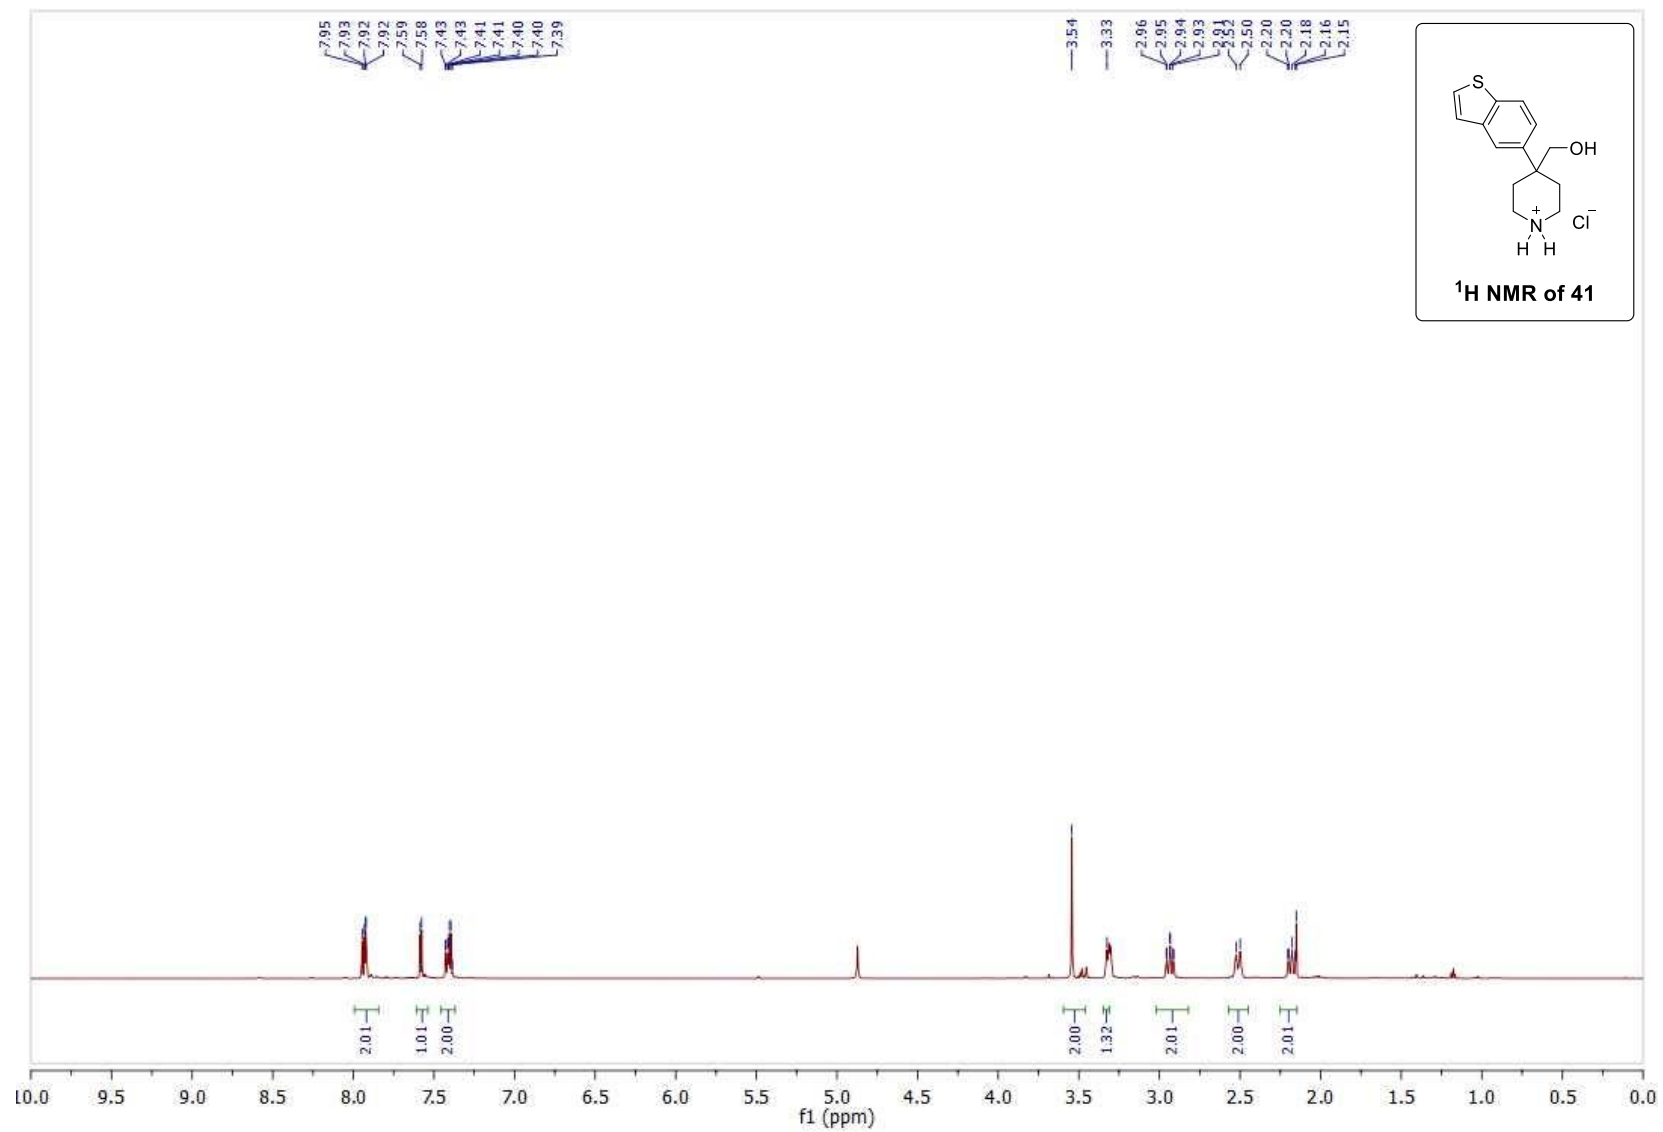



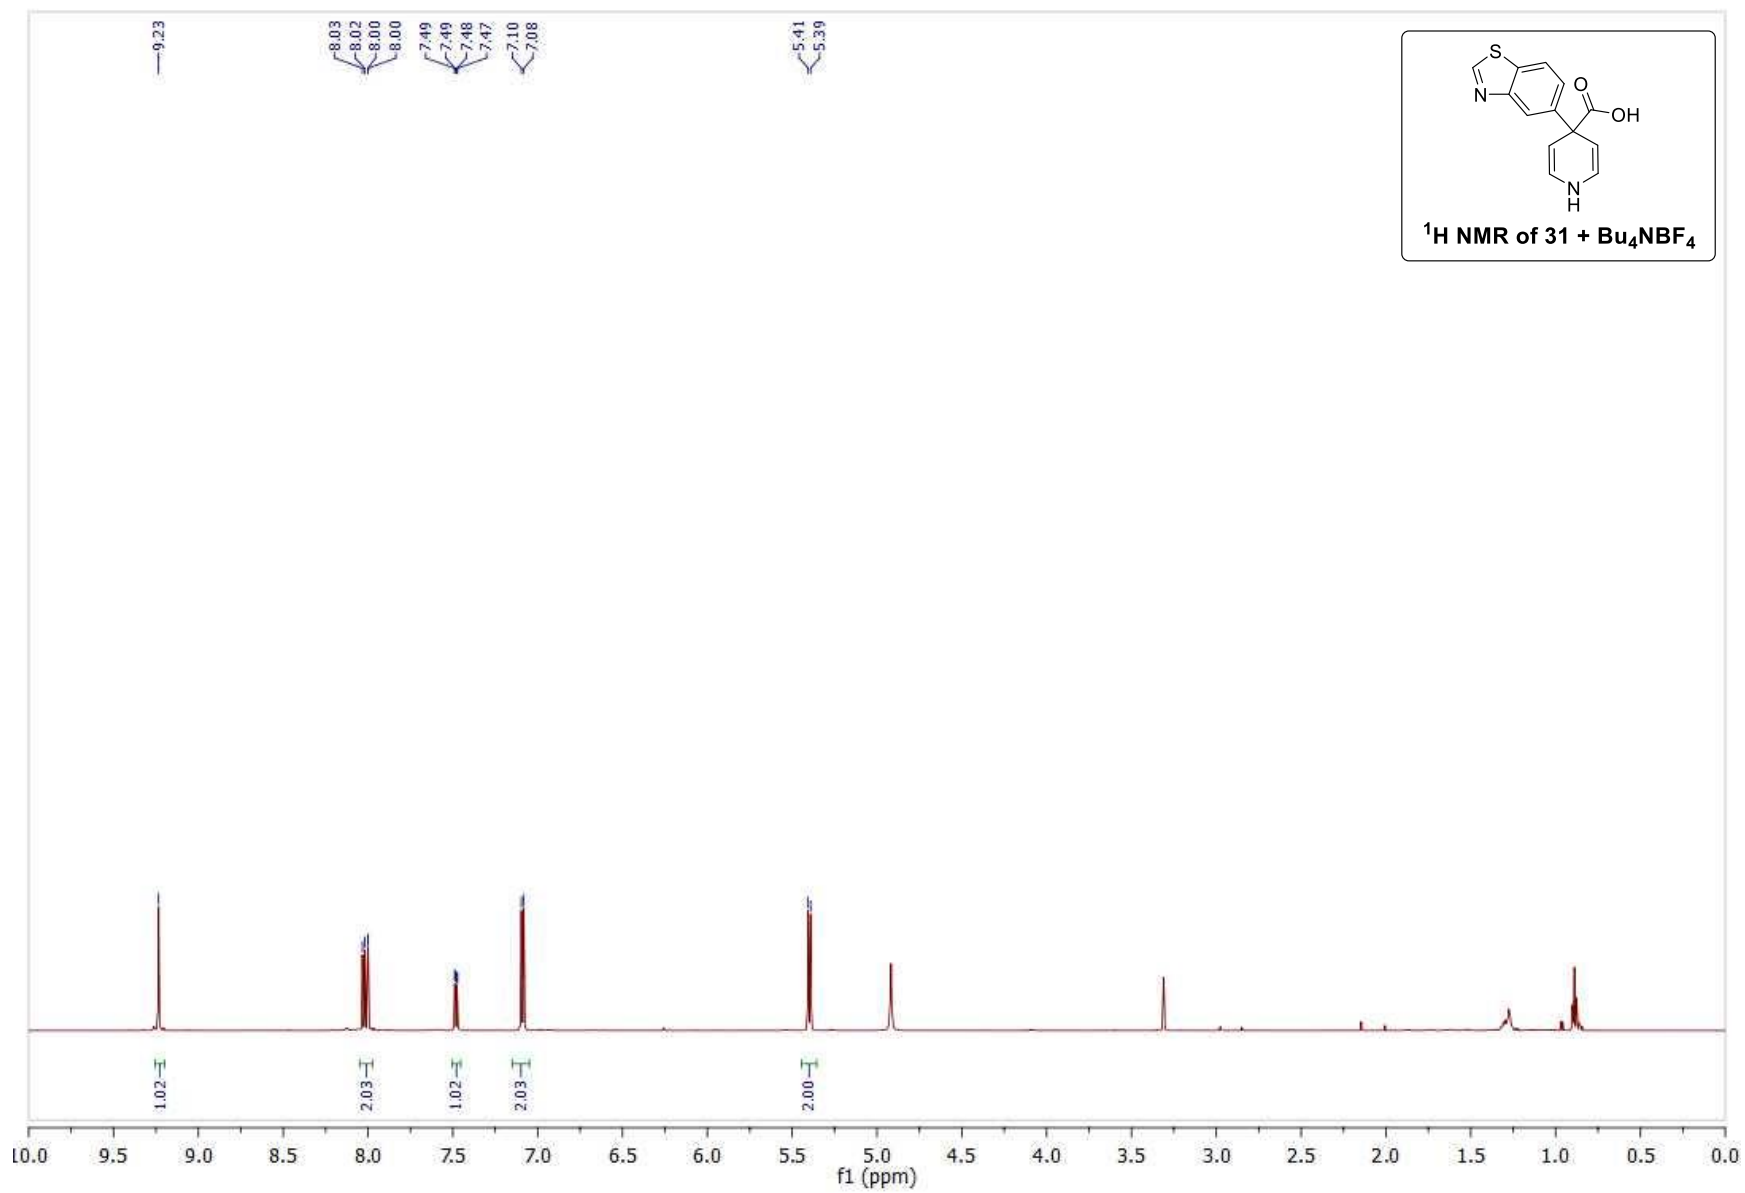

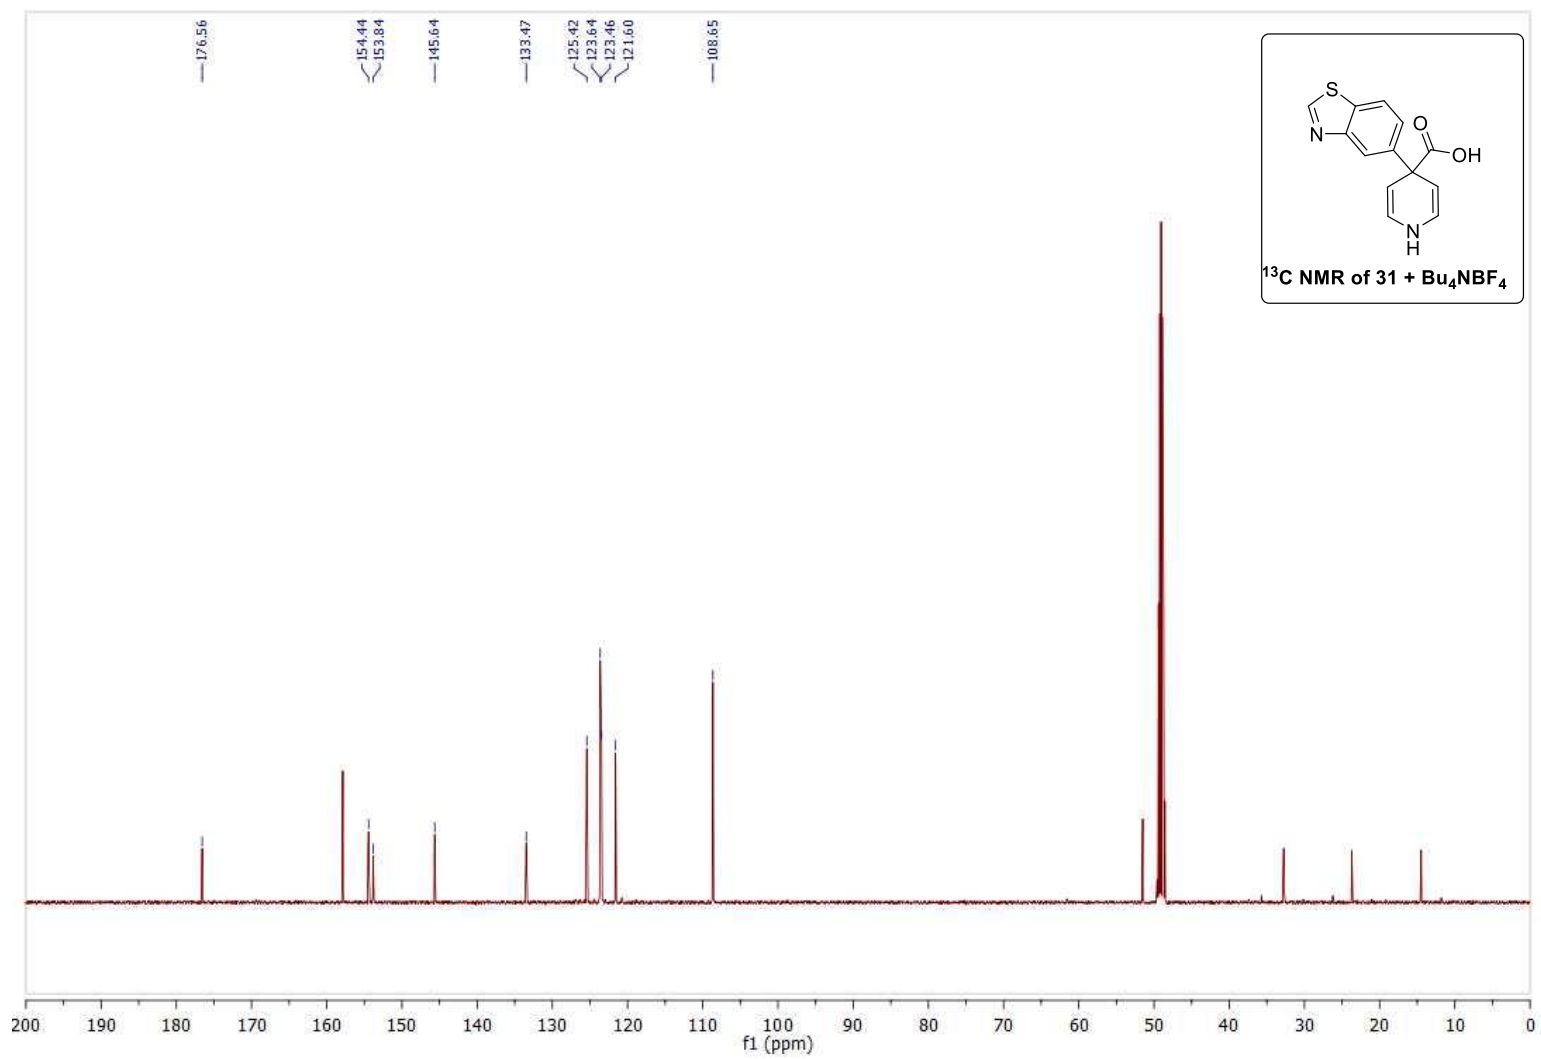

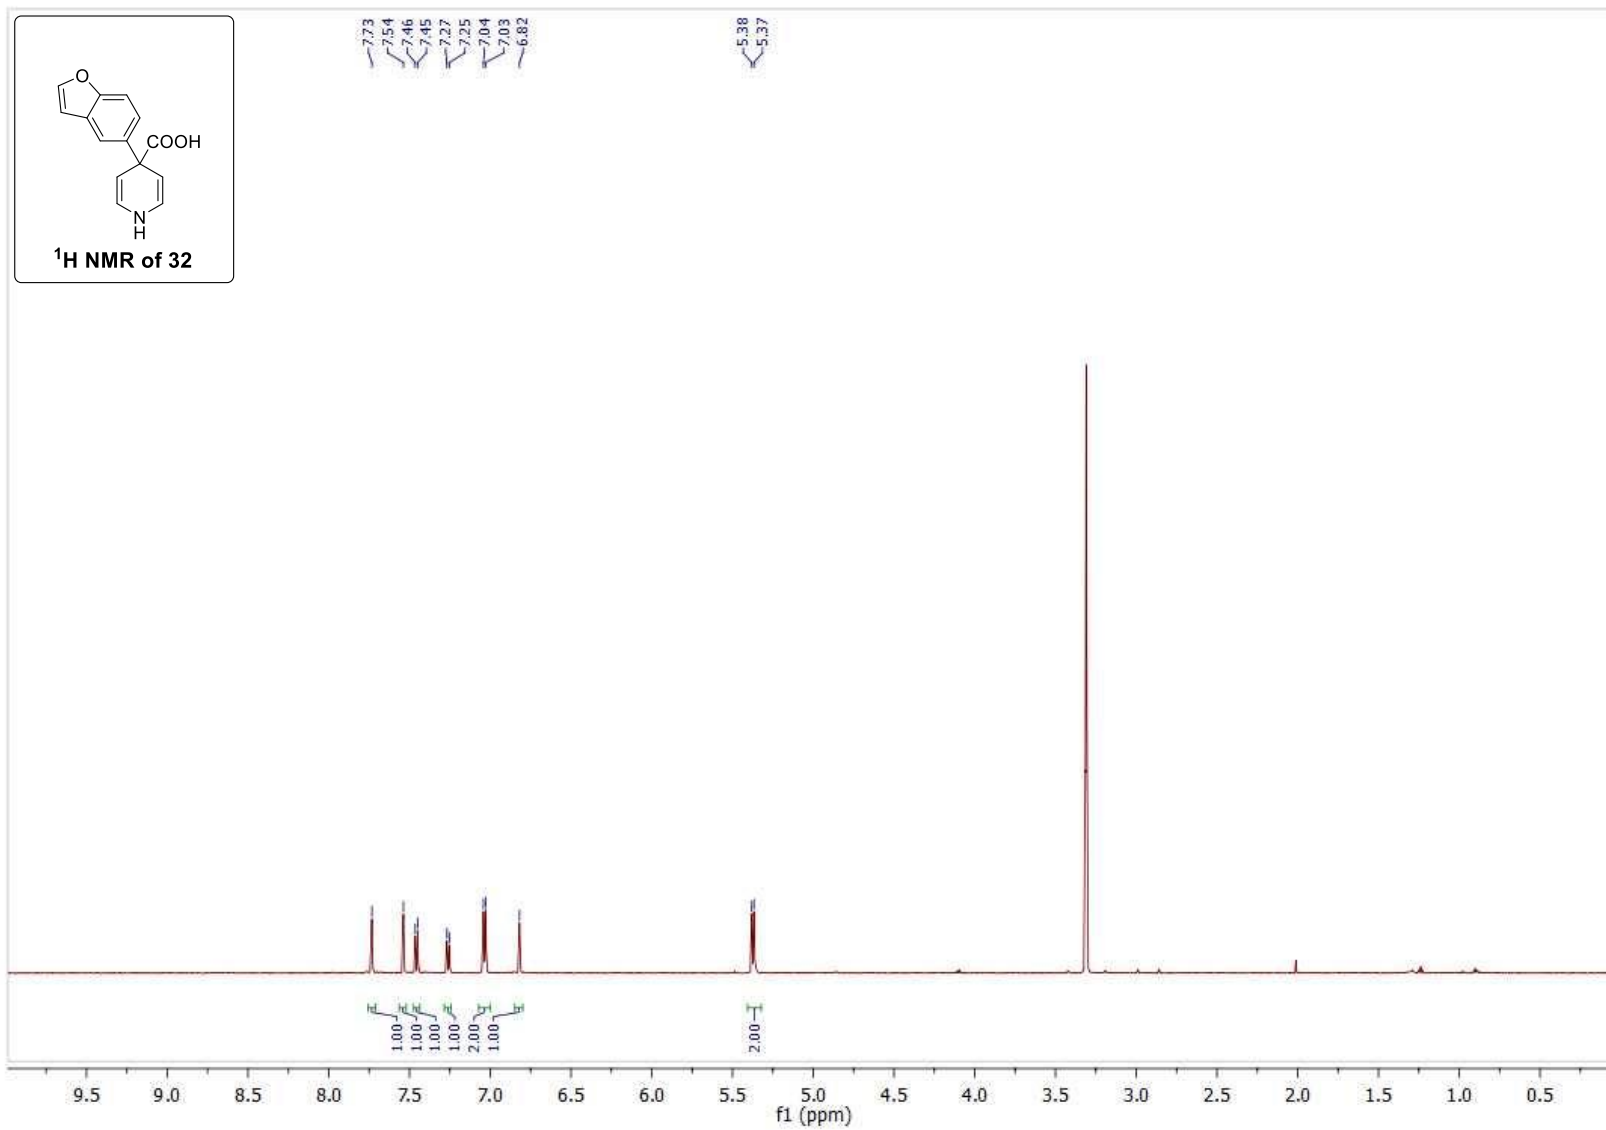

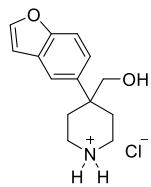

**<sup>1</sup>H NMR of 42**

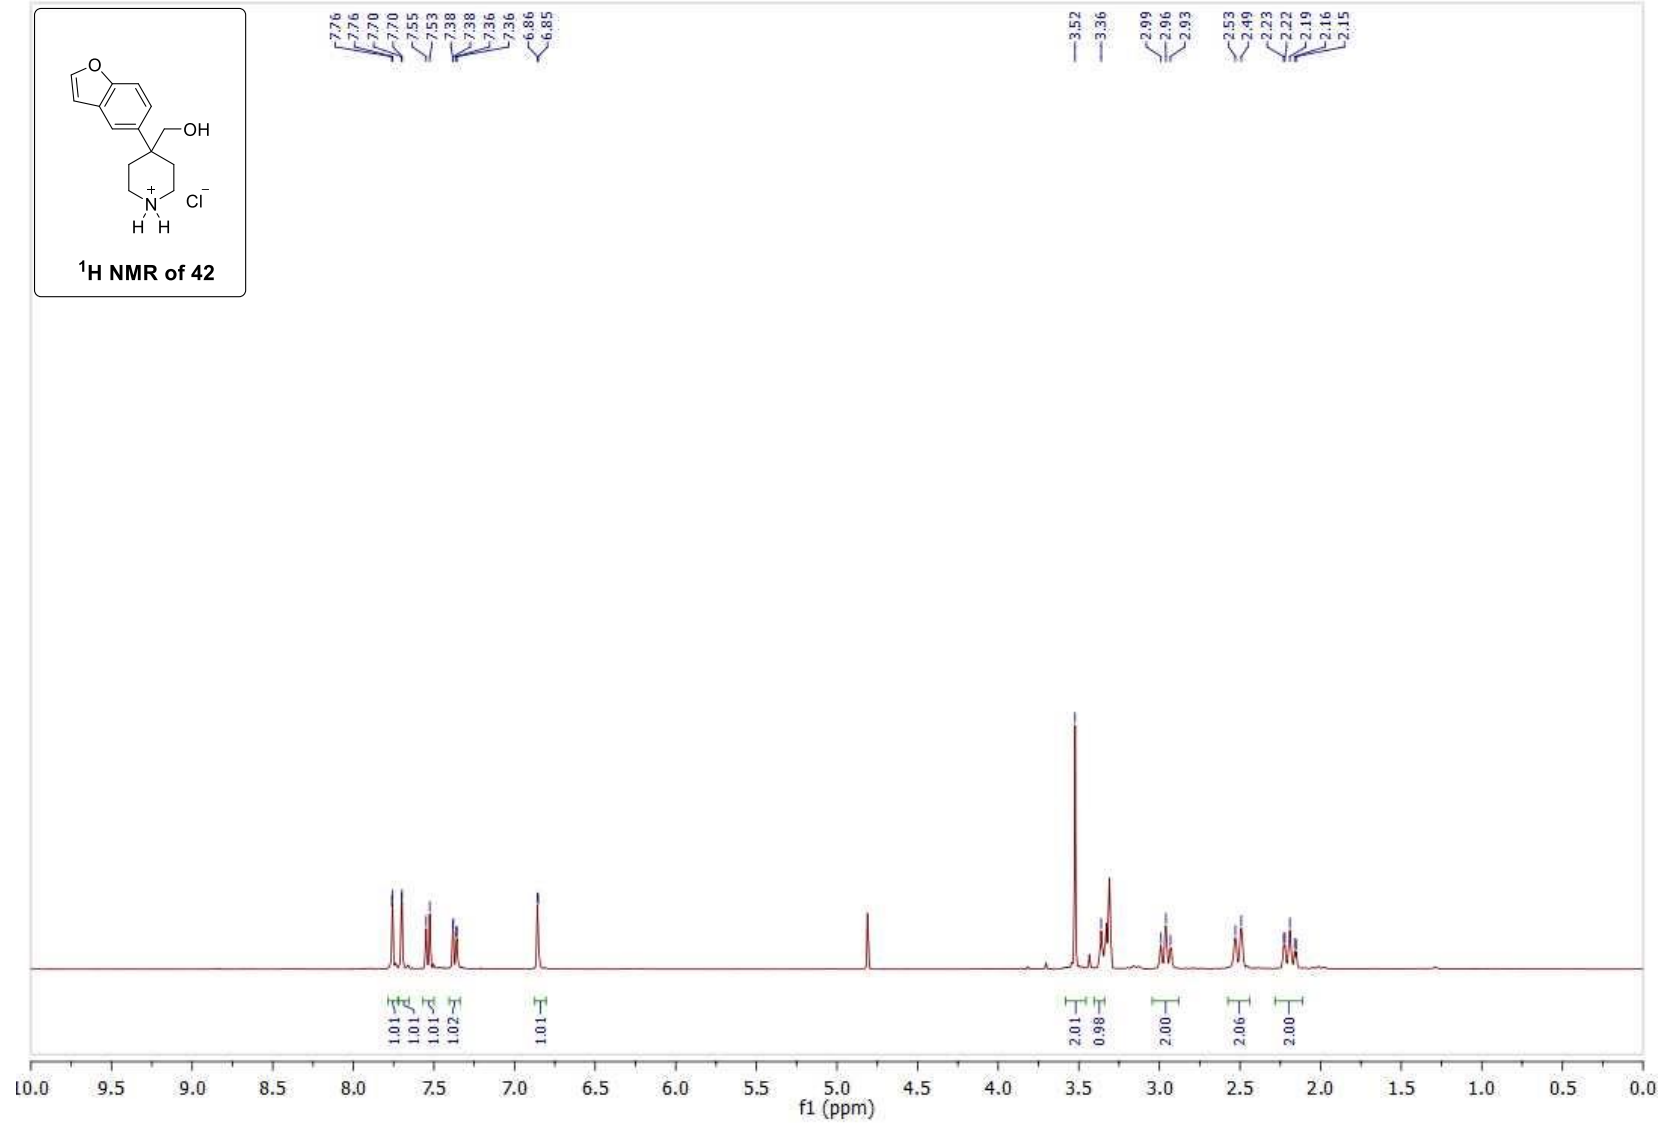



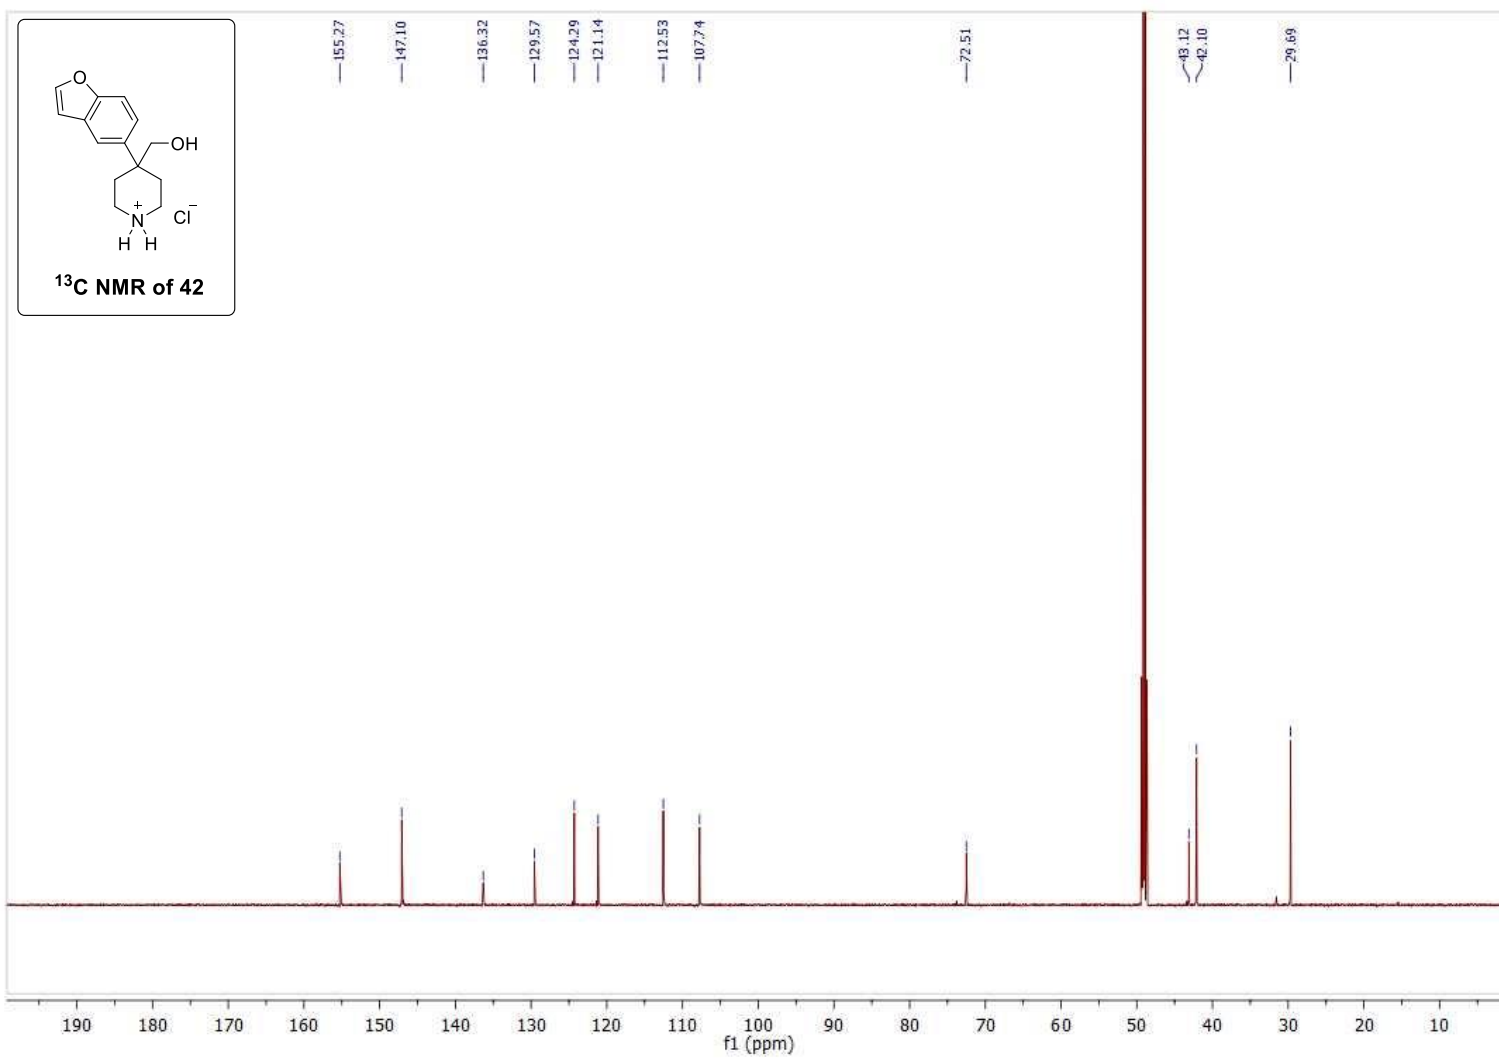

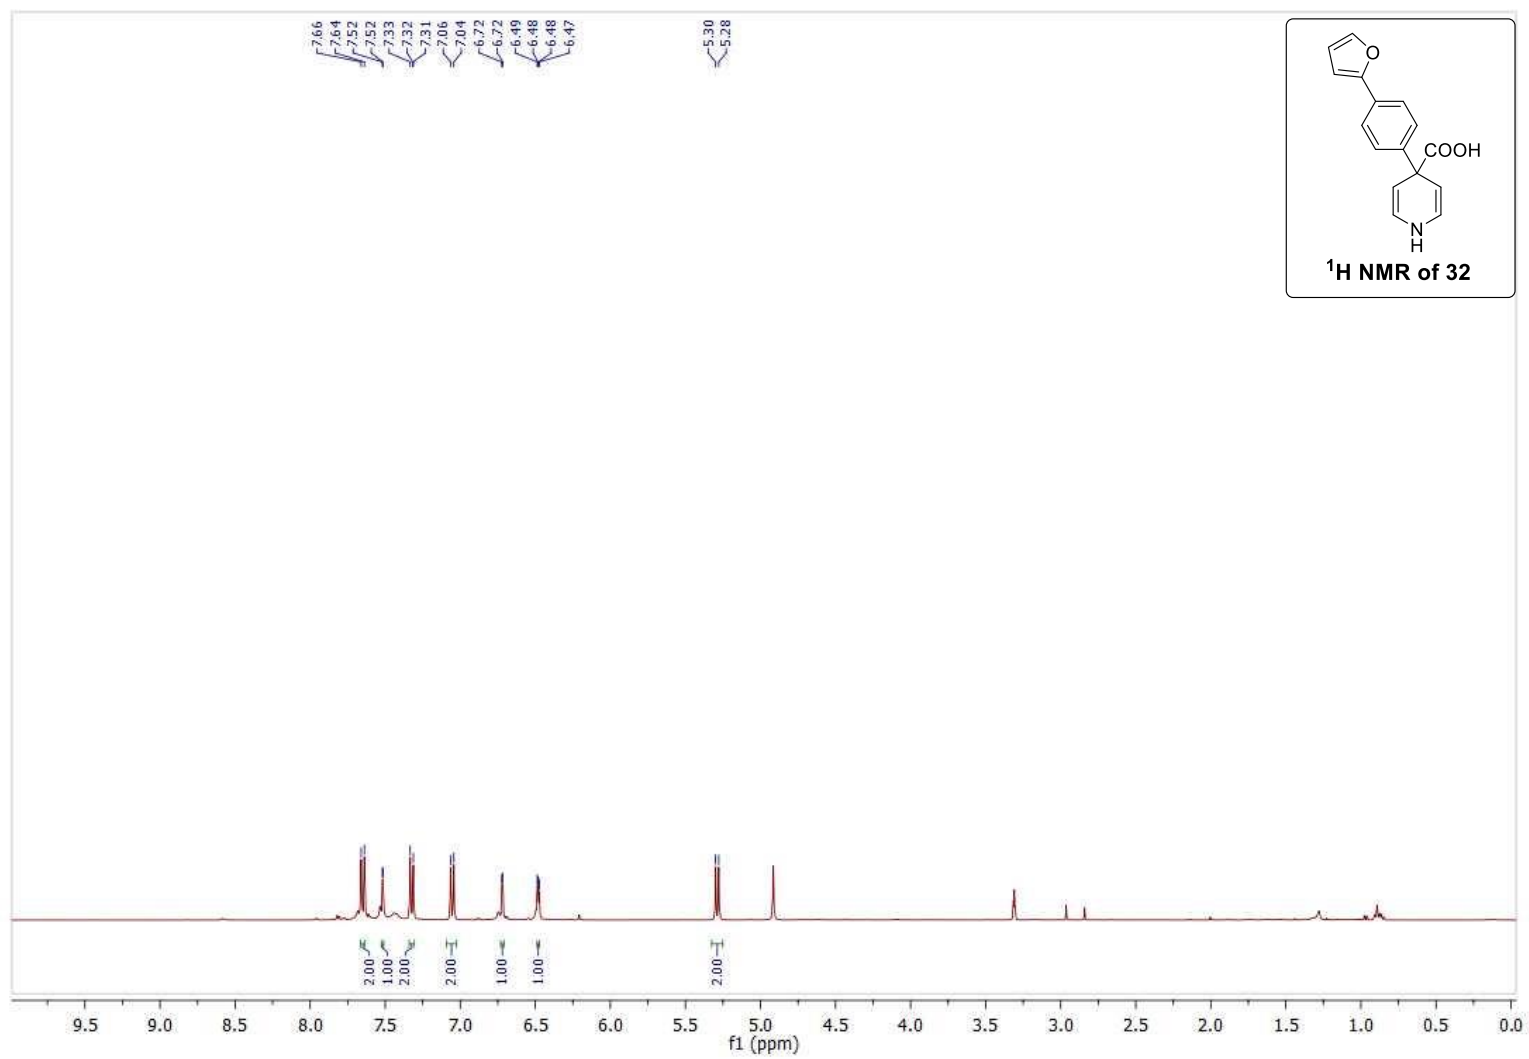

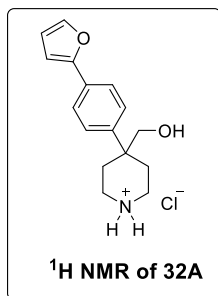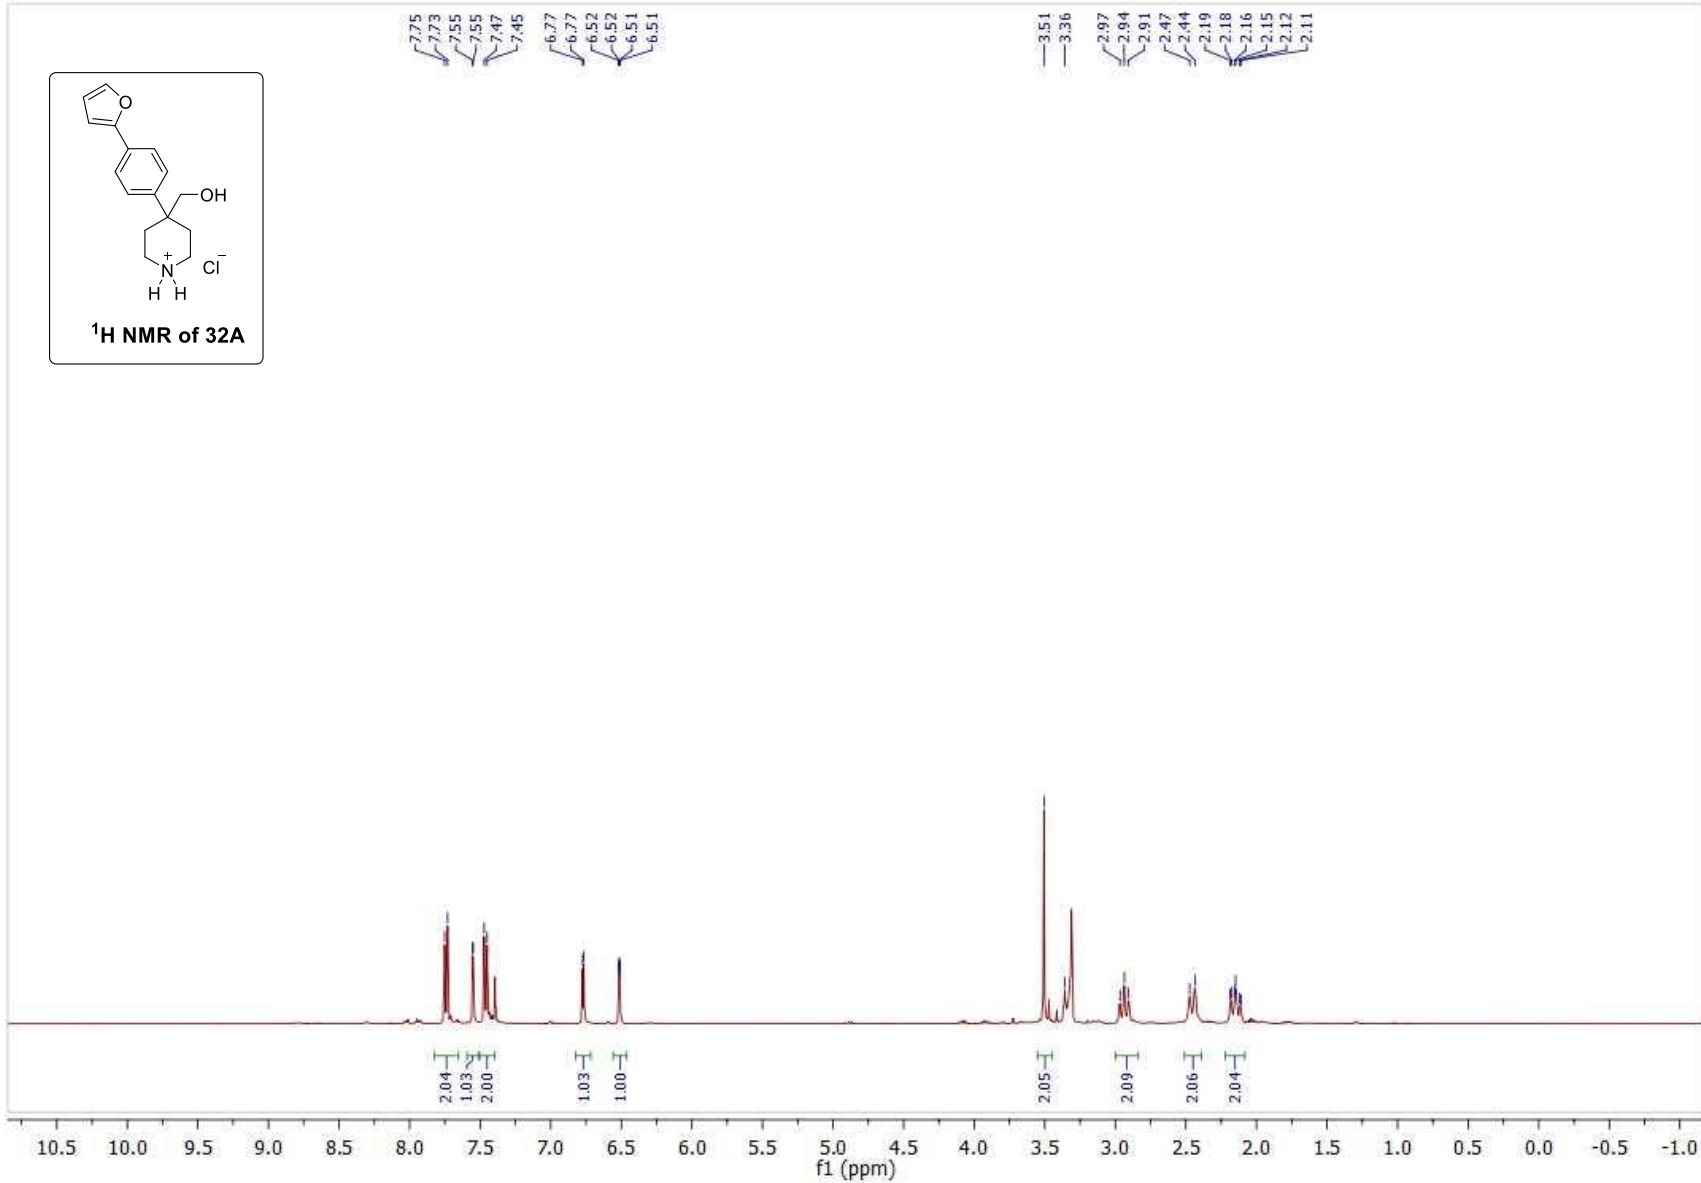

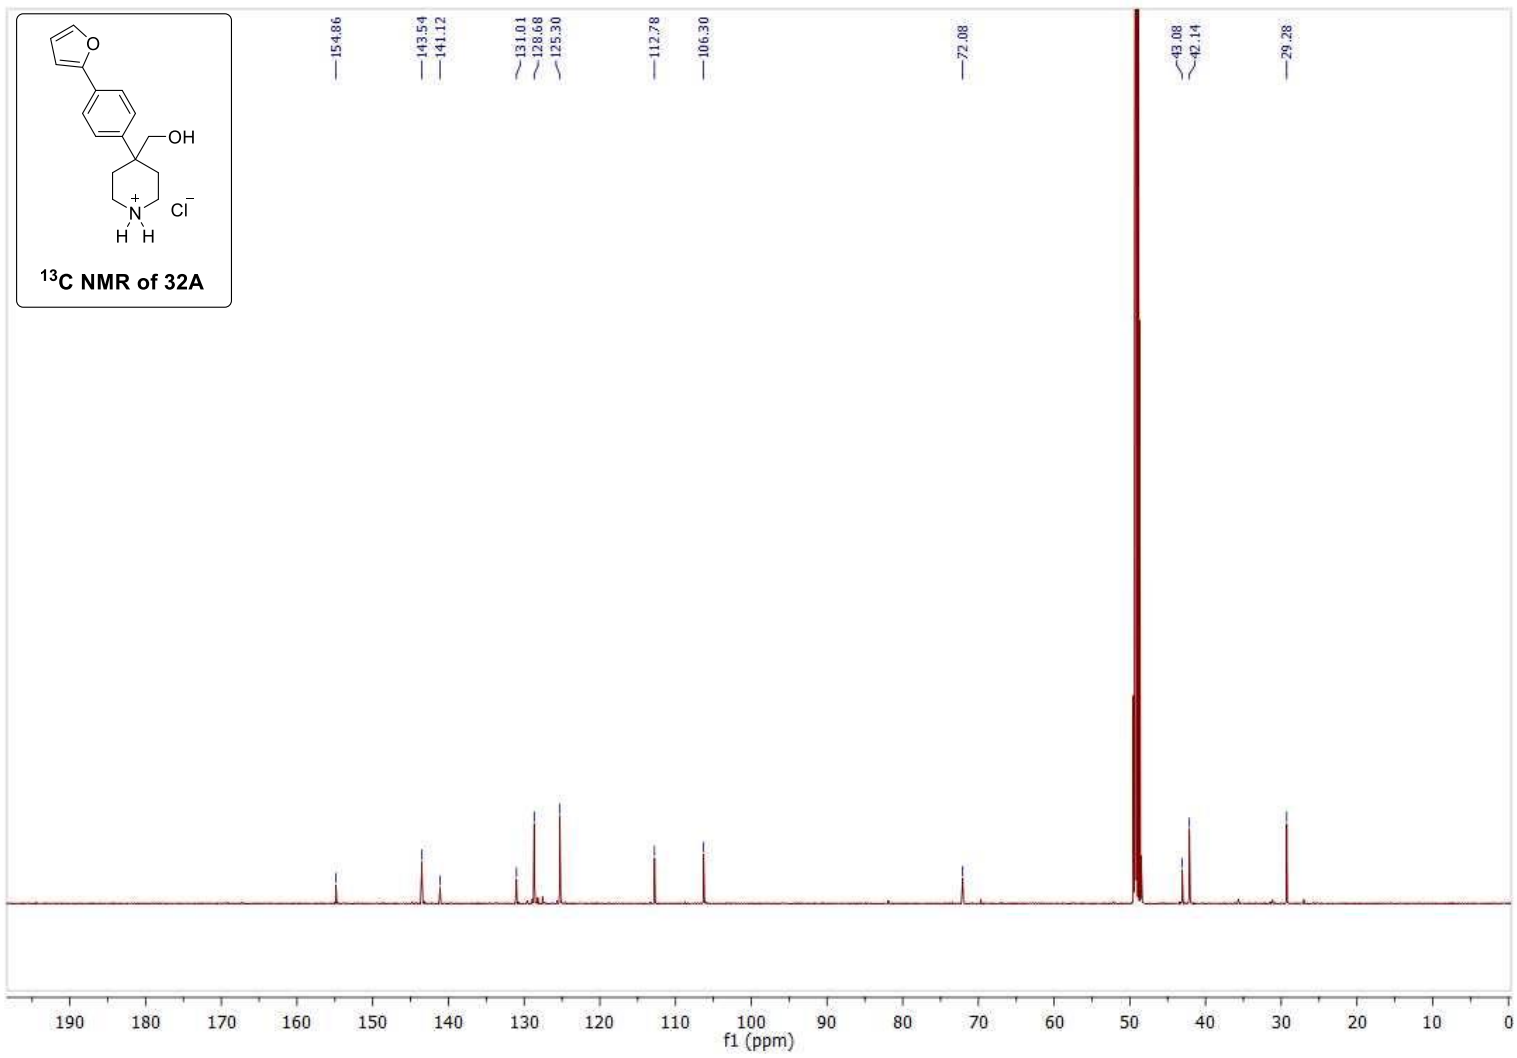

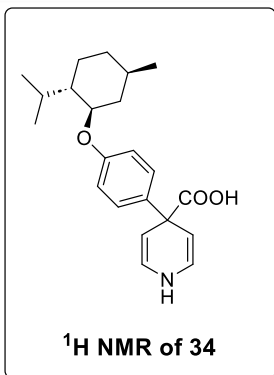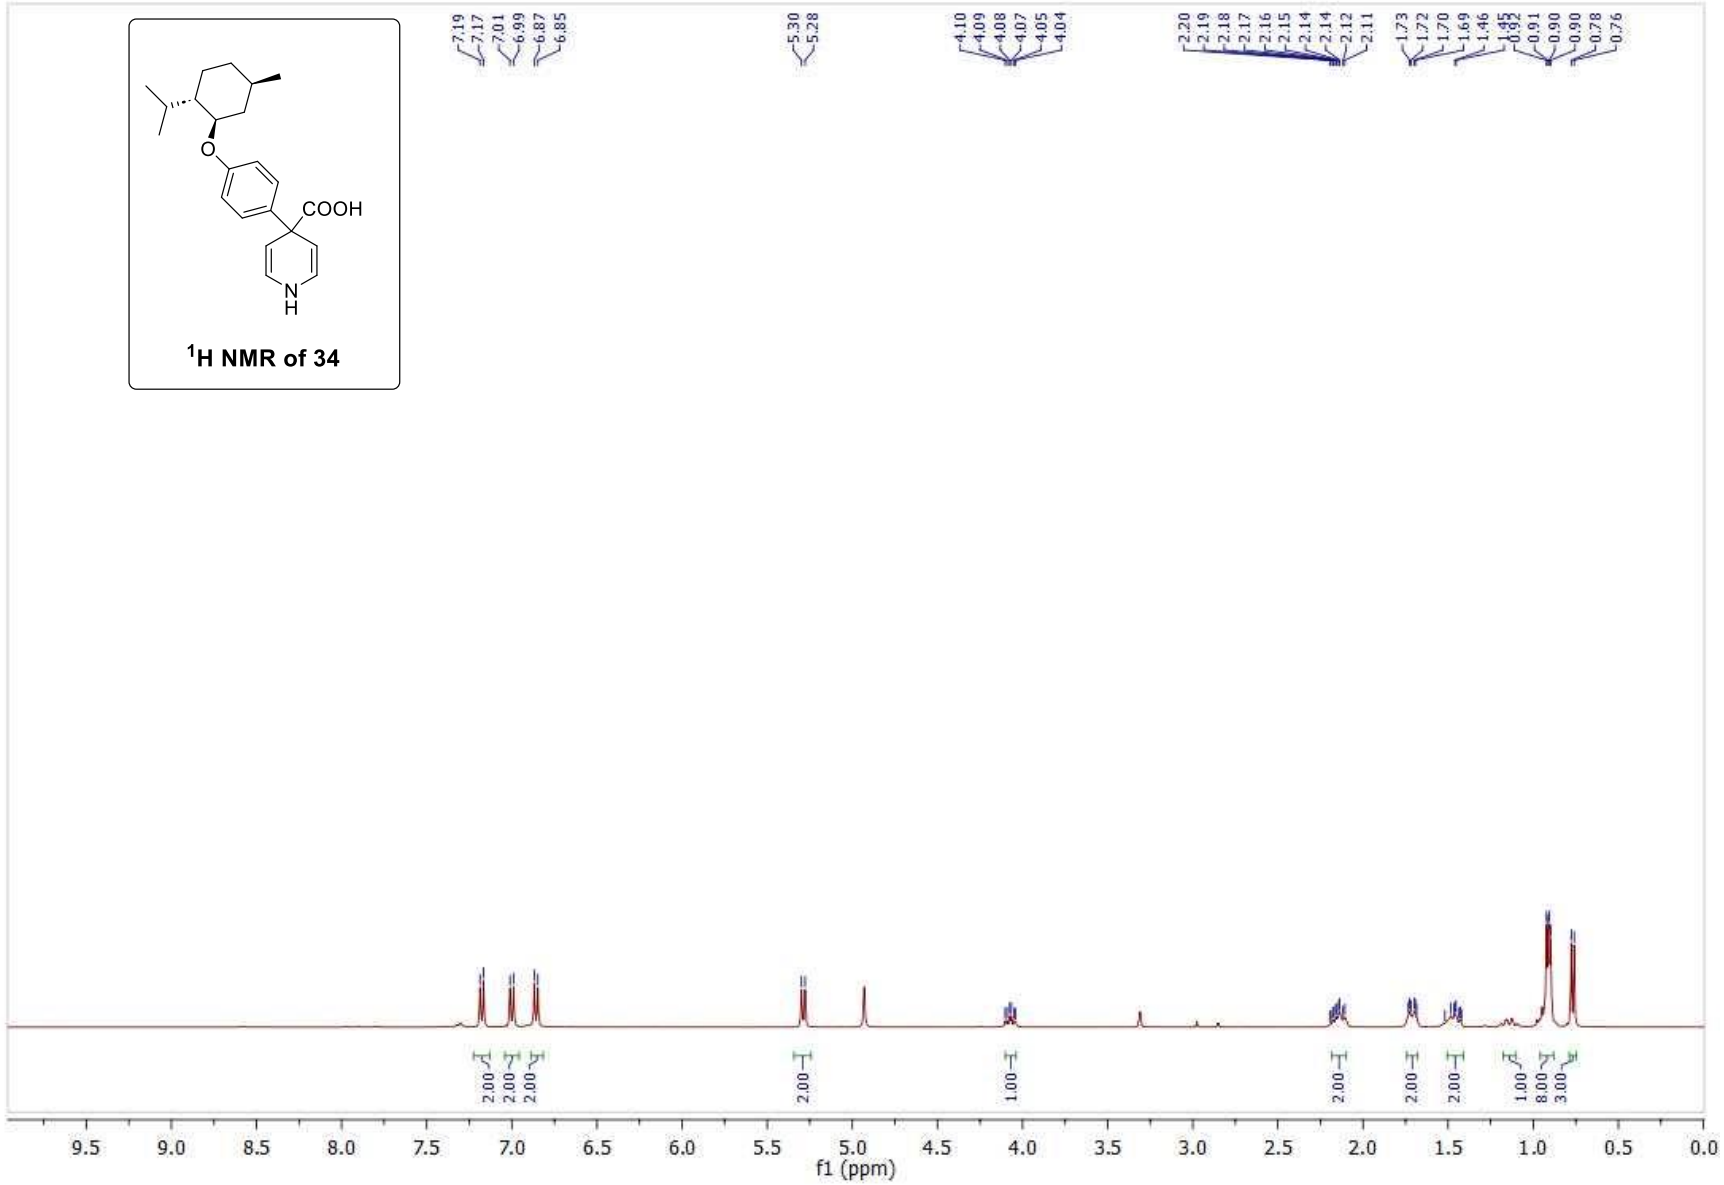

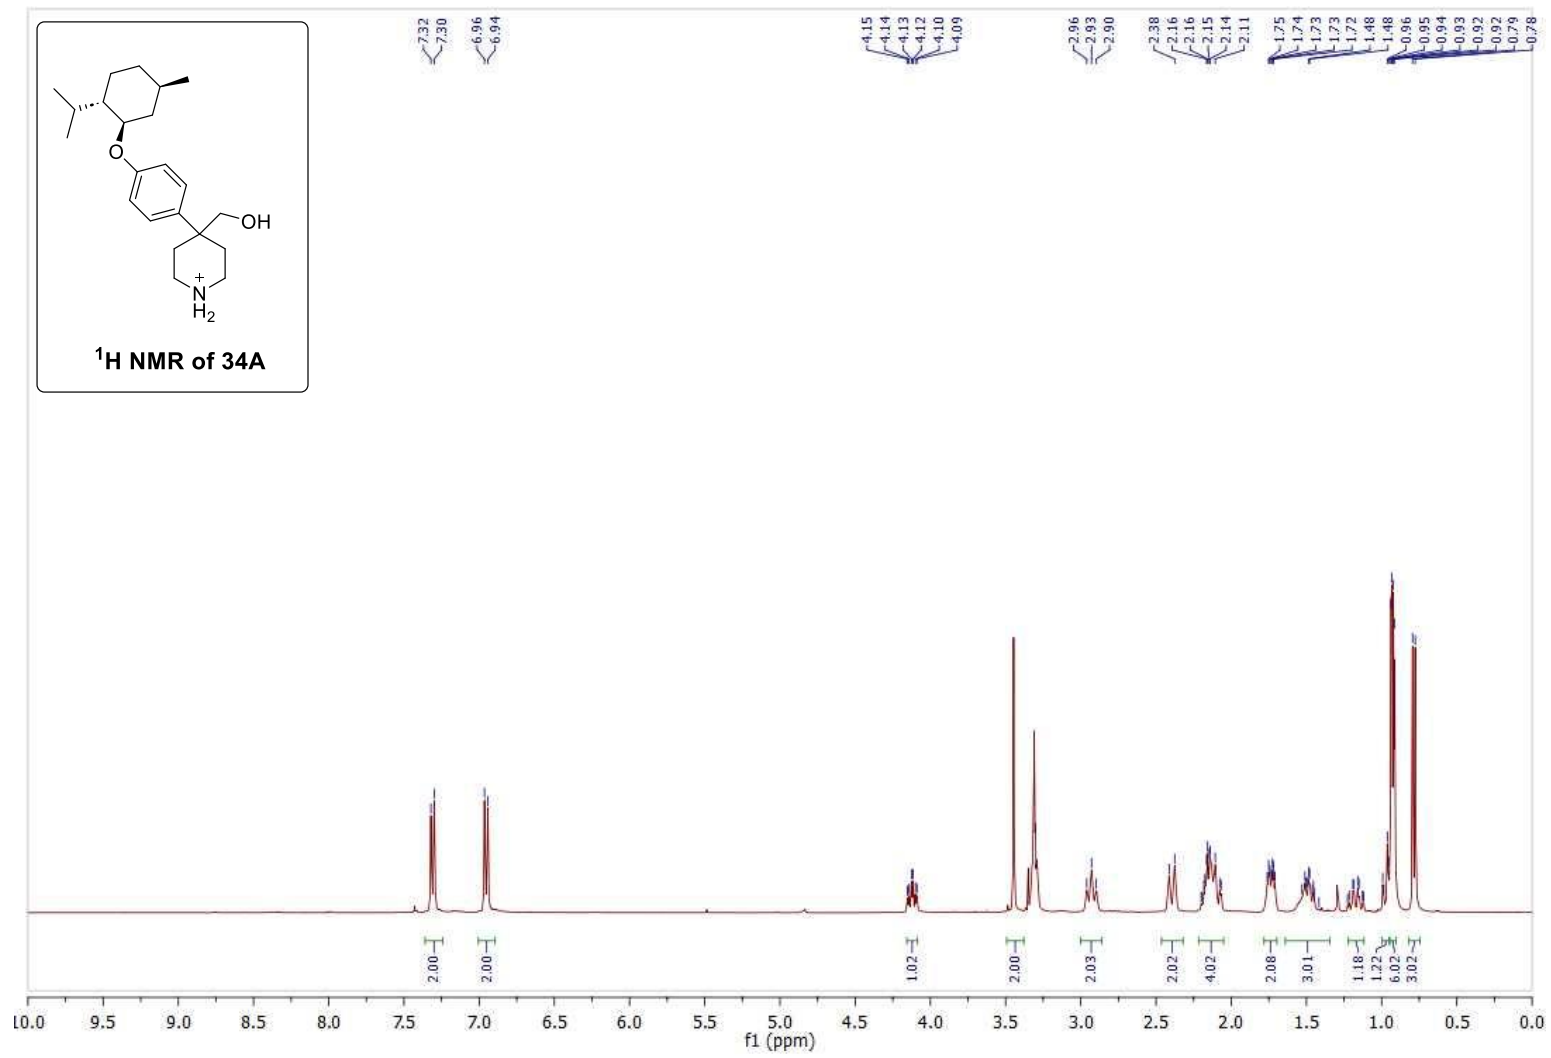

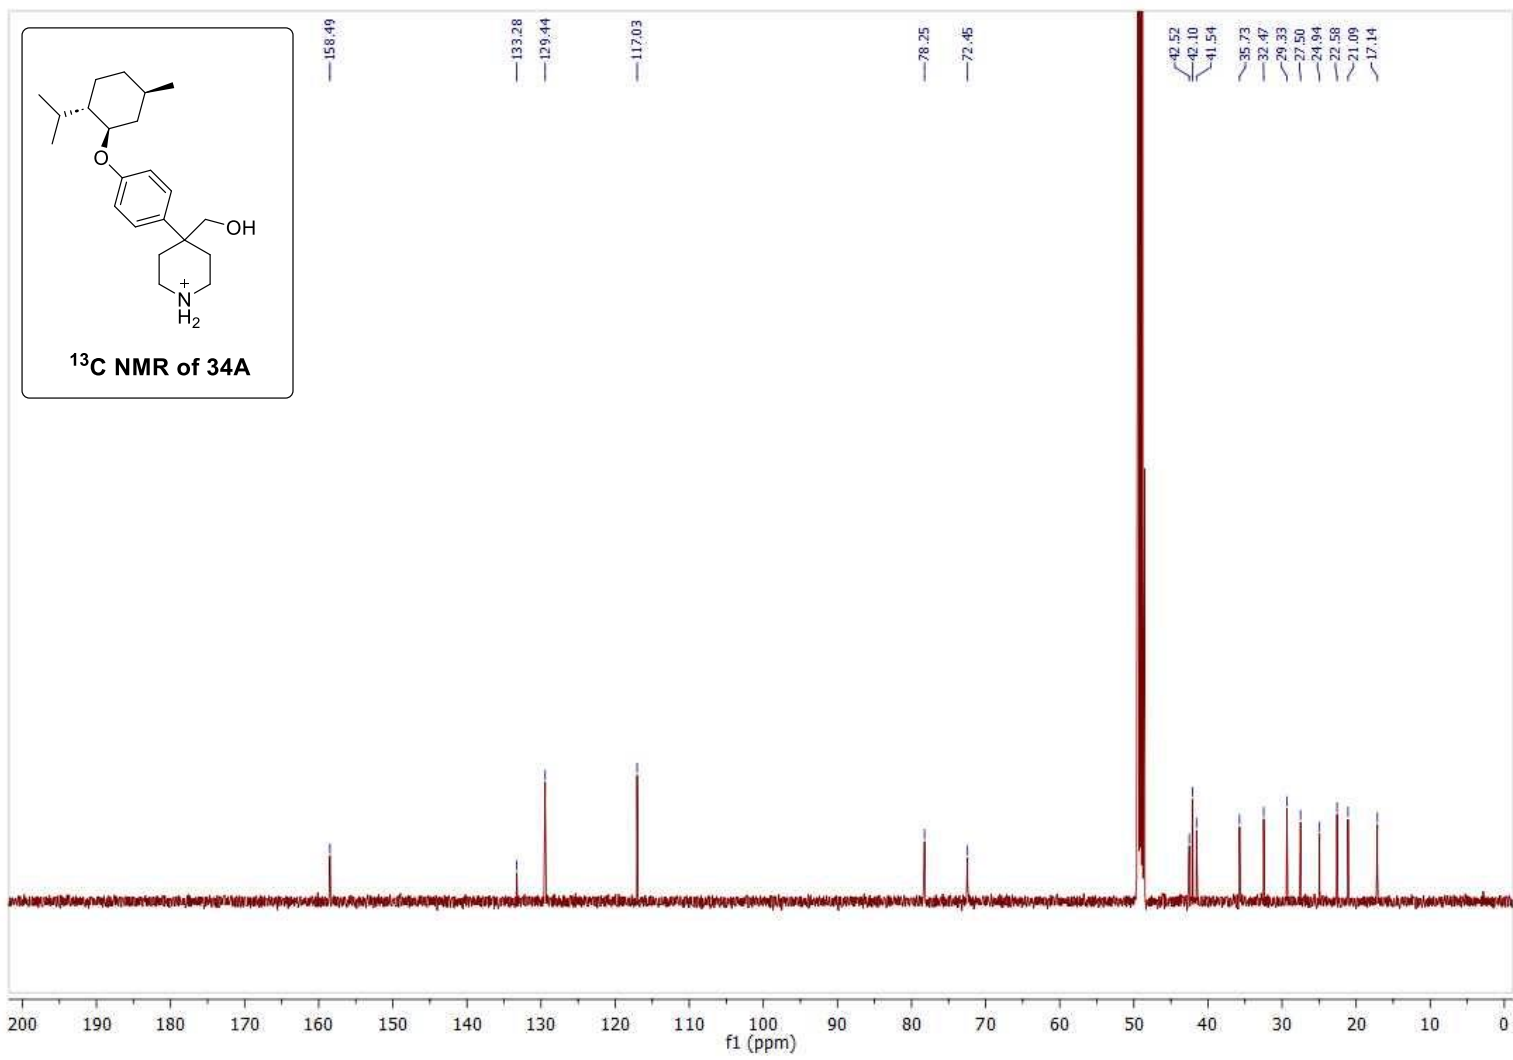

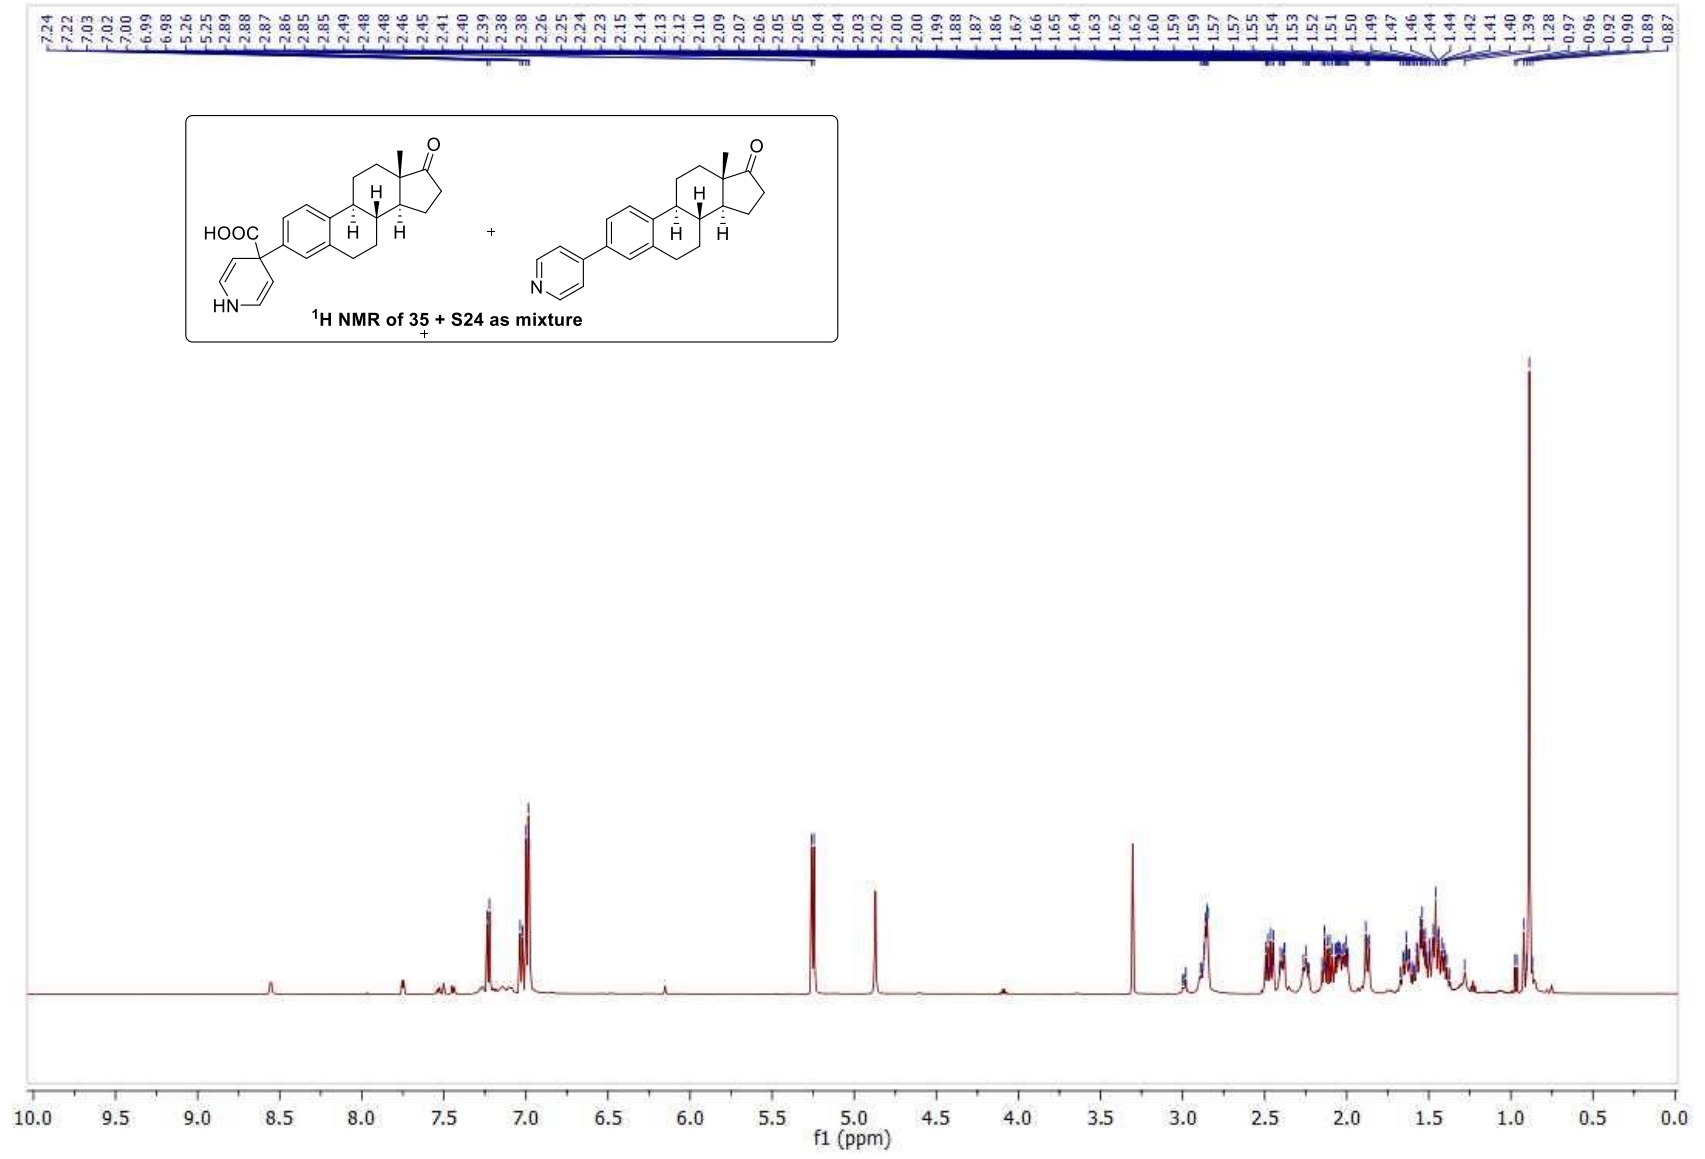



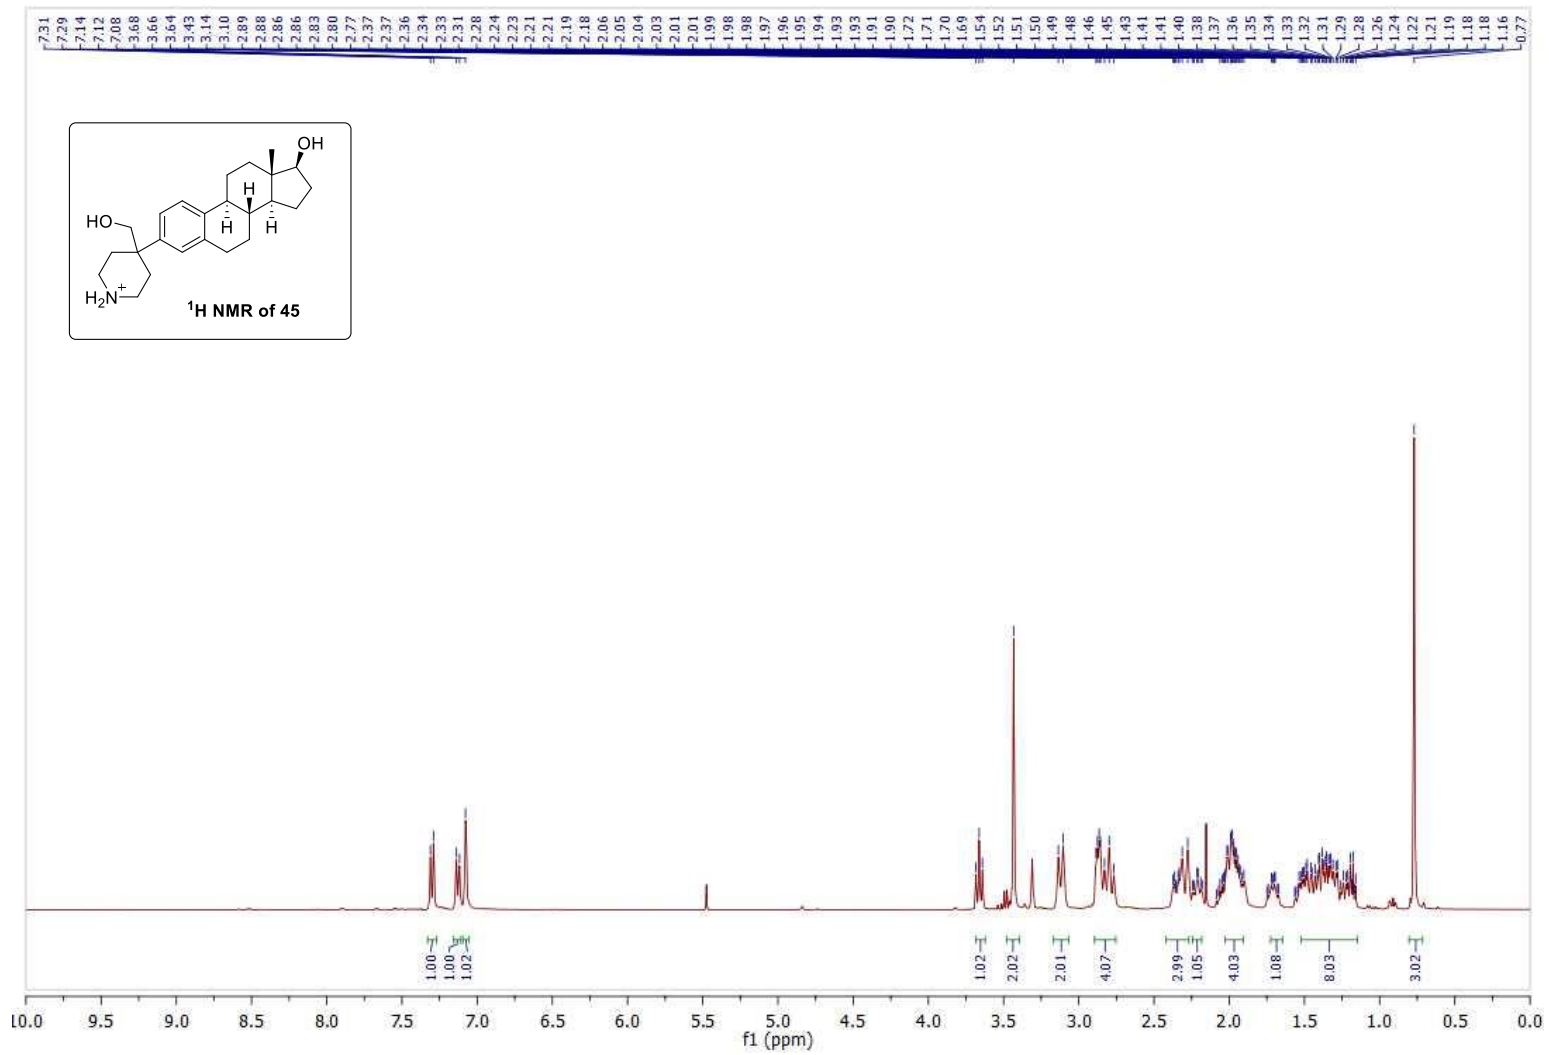

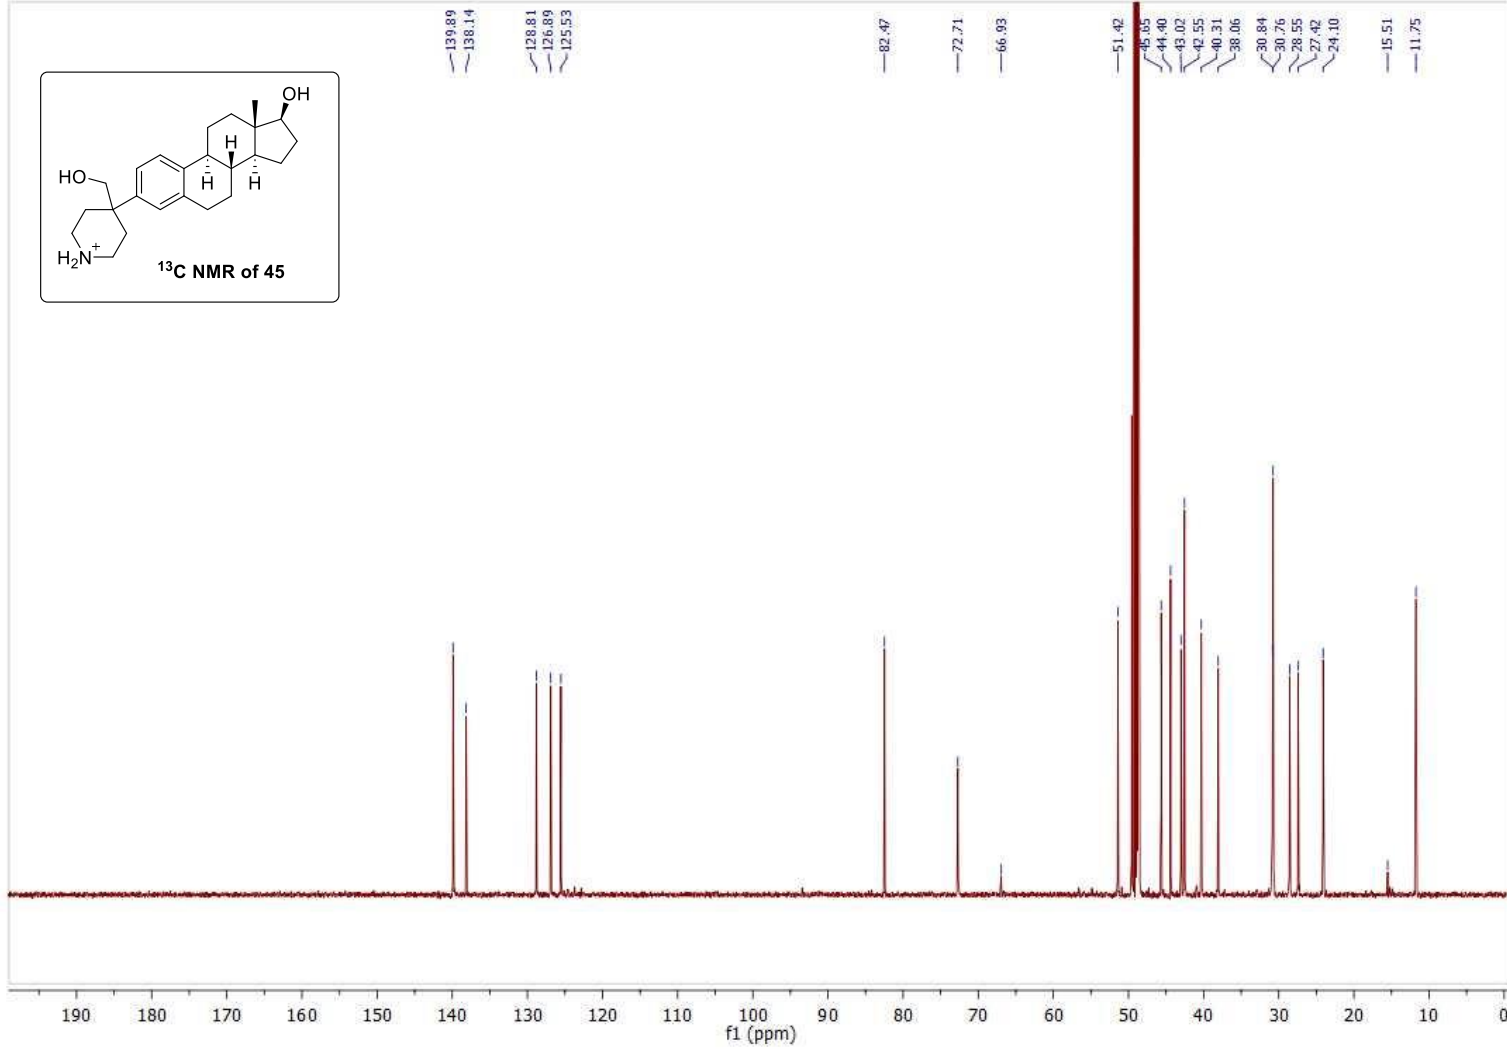

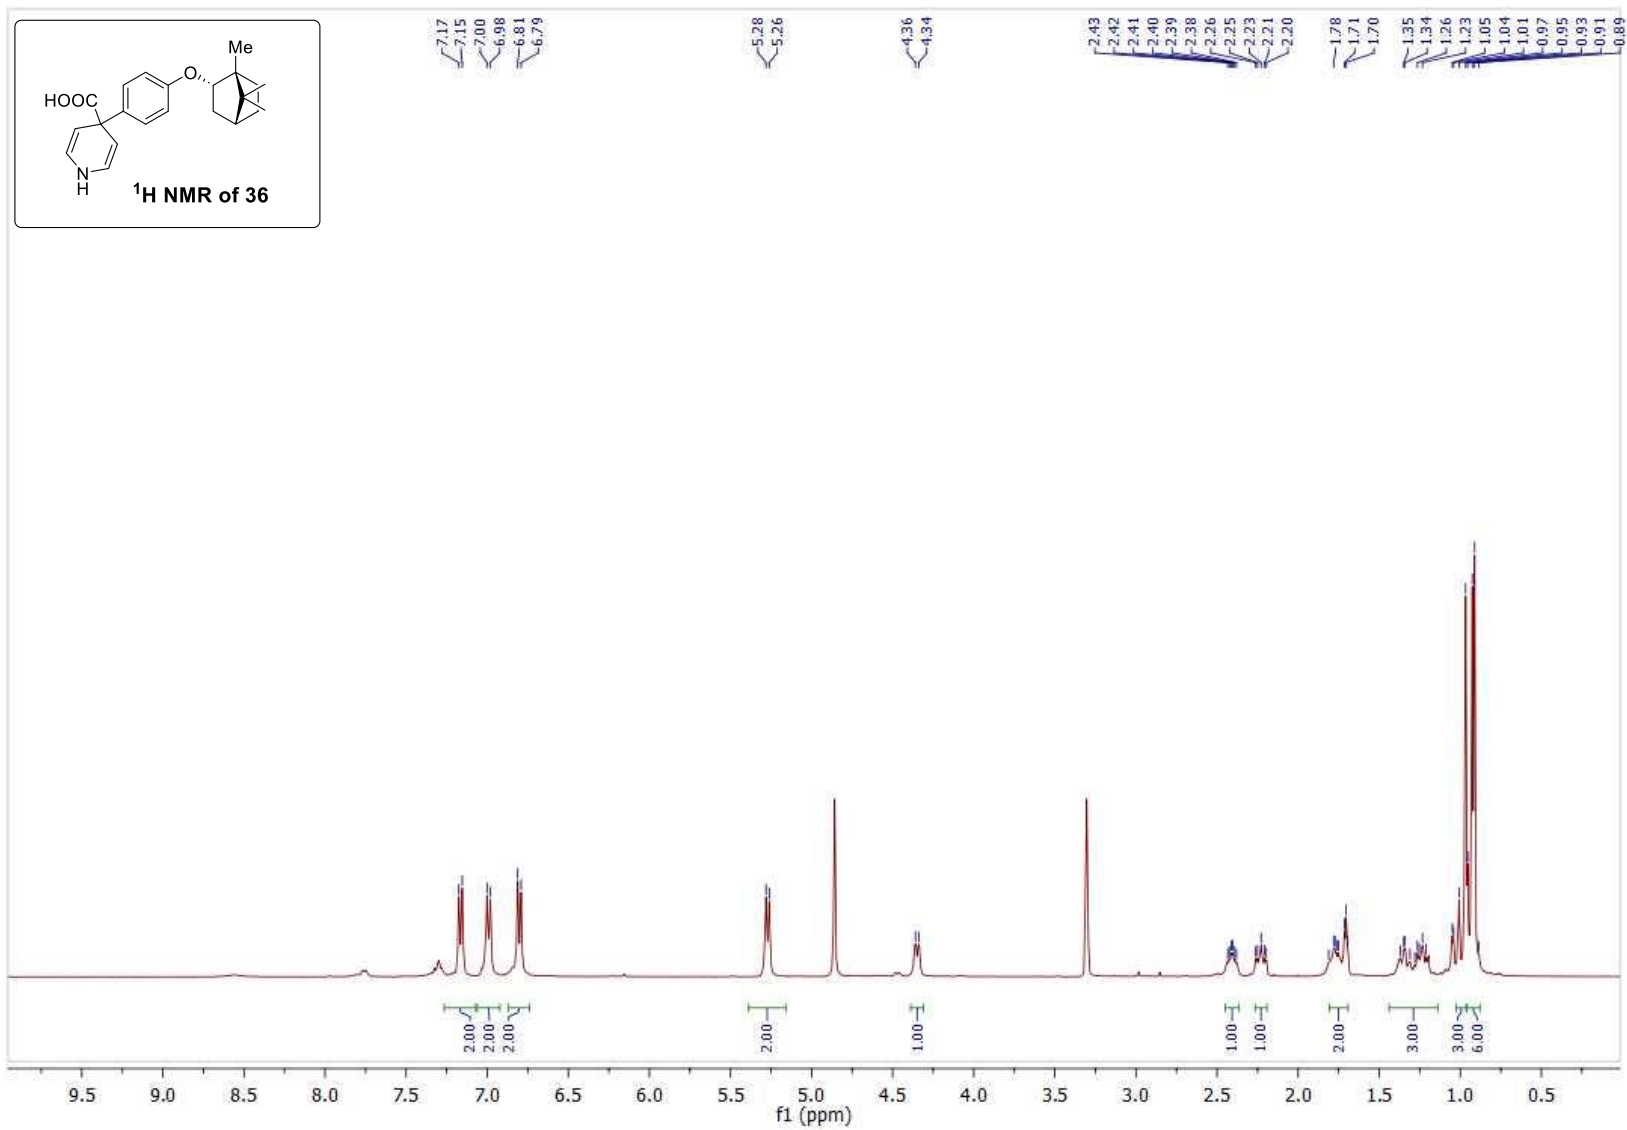

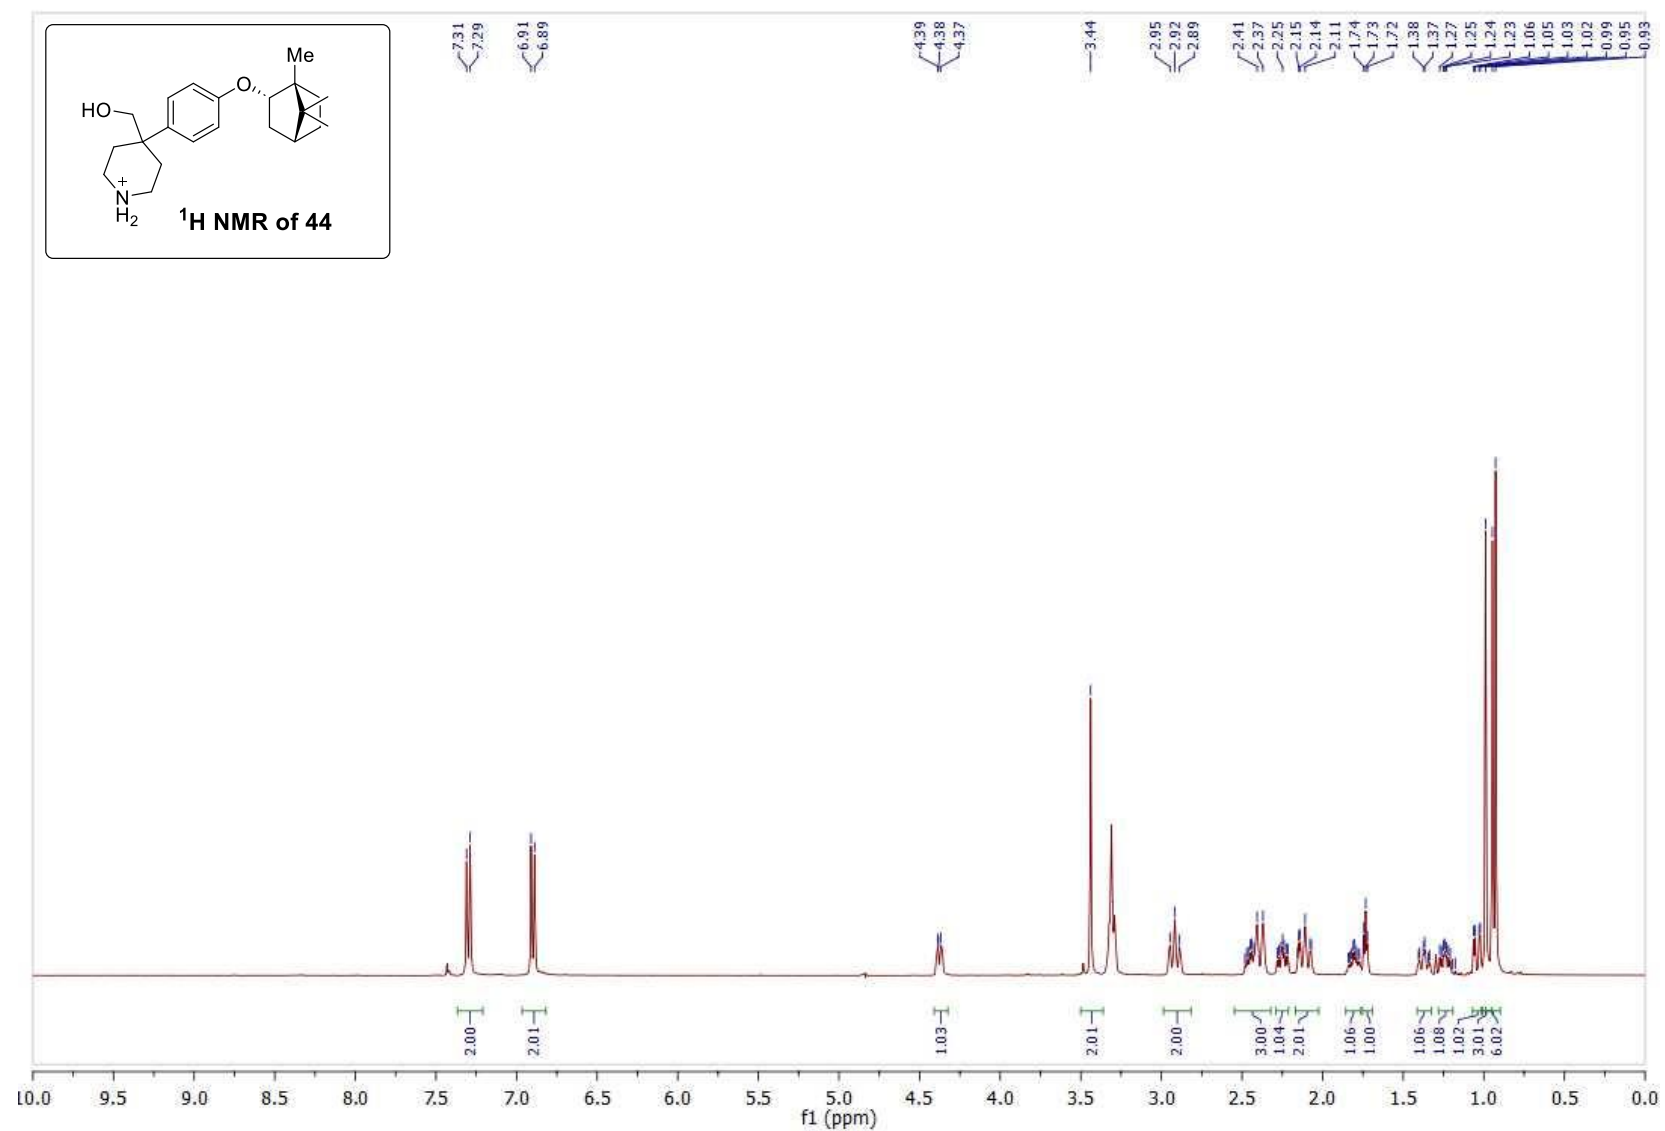

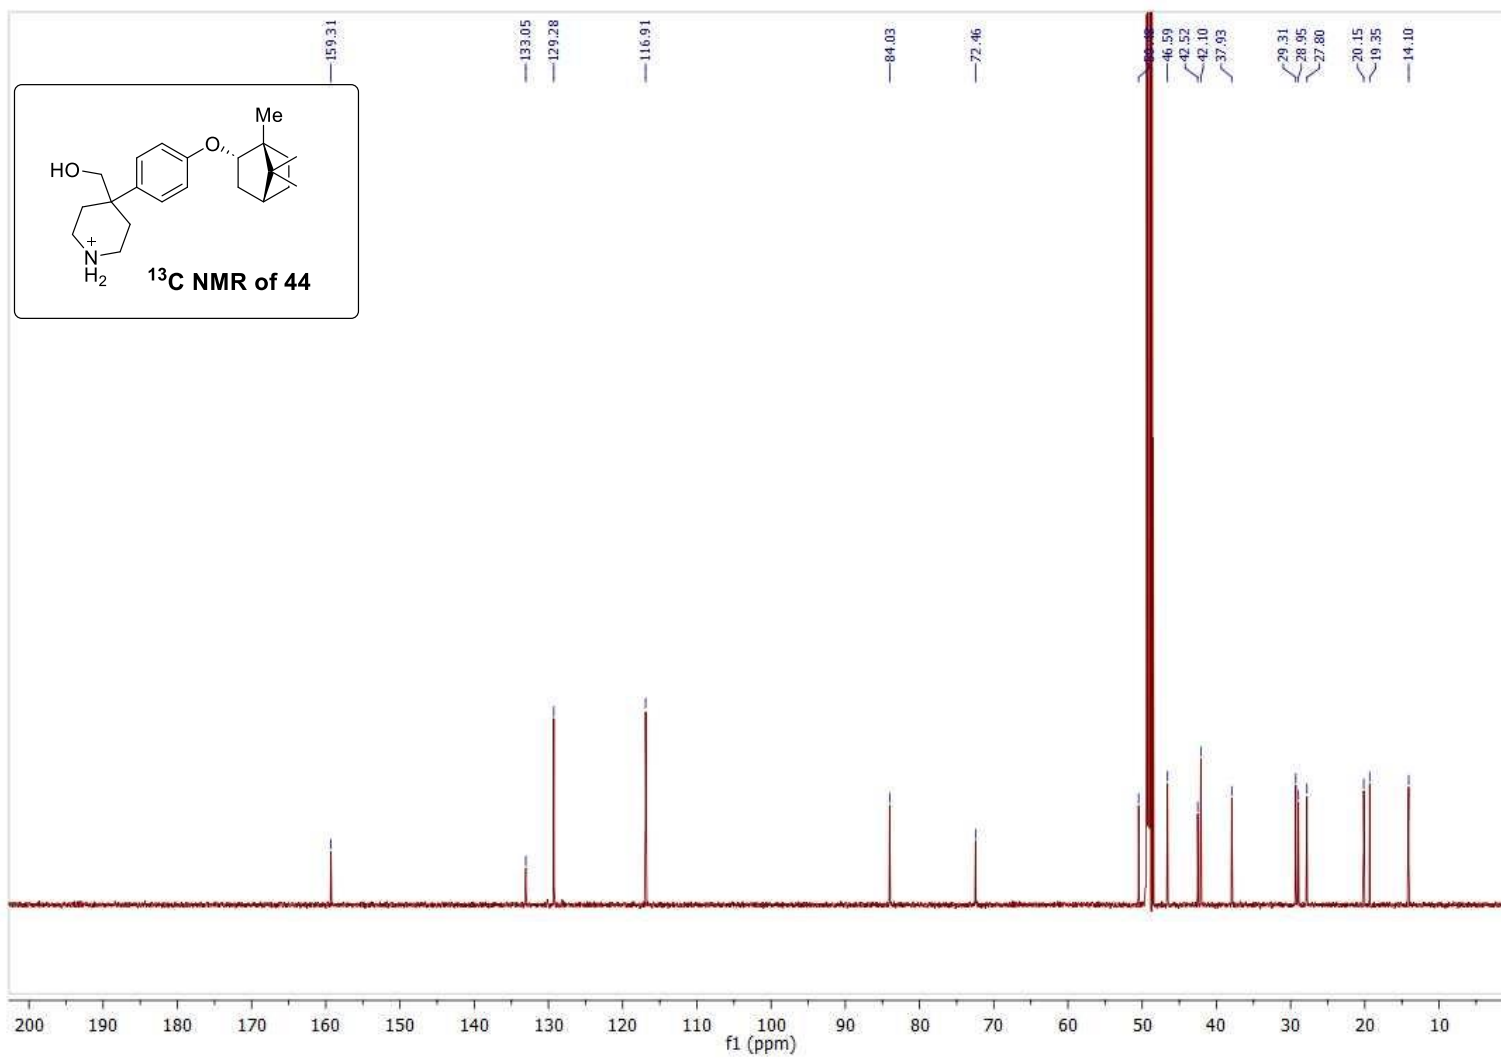

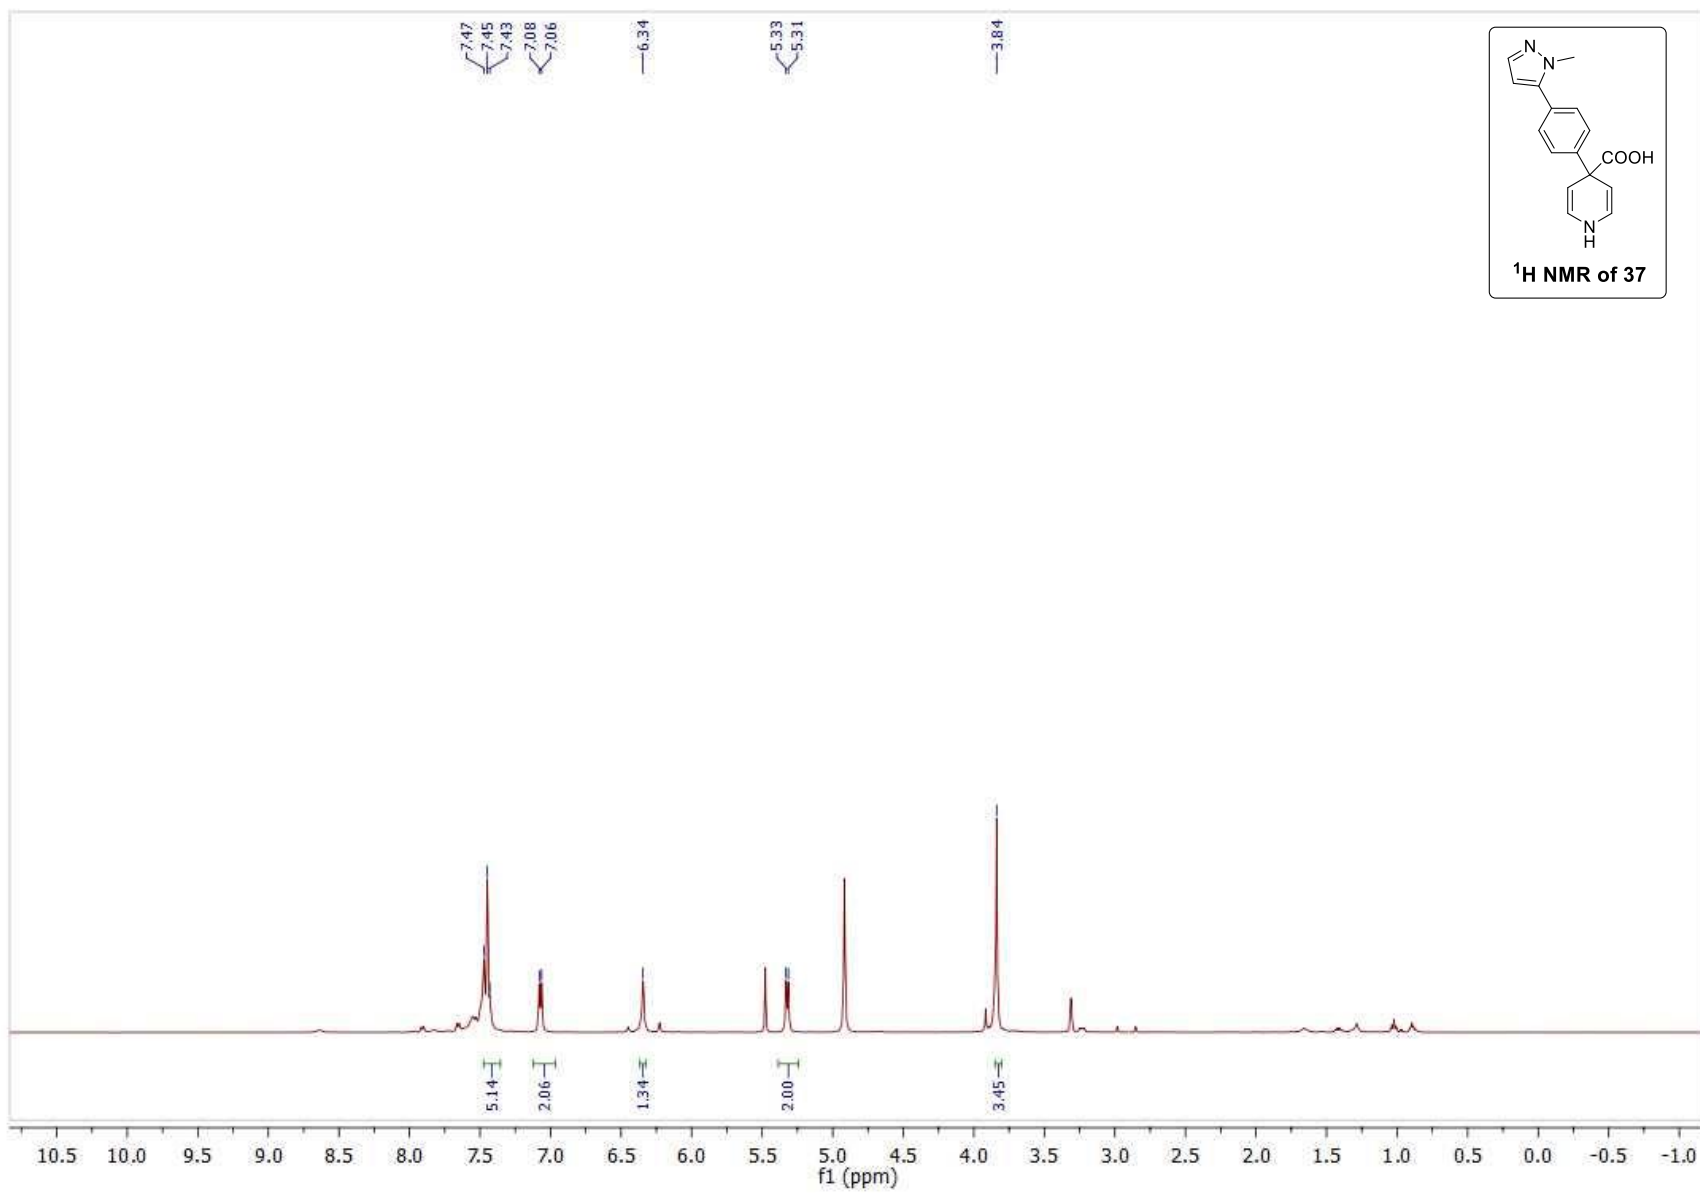

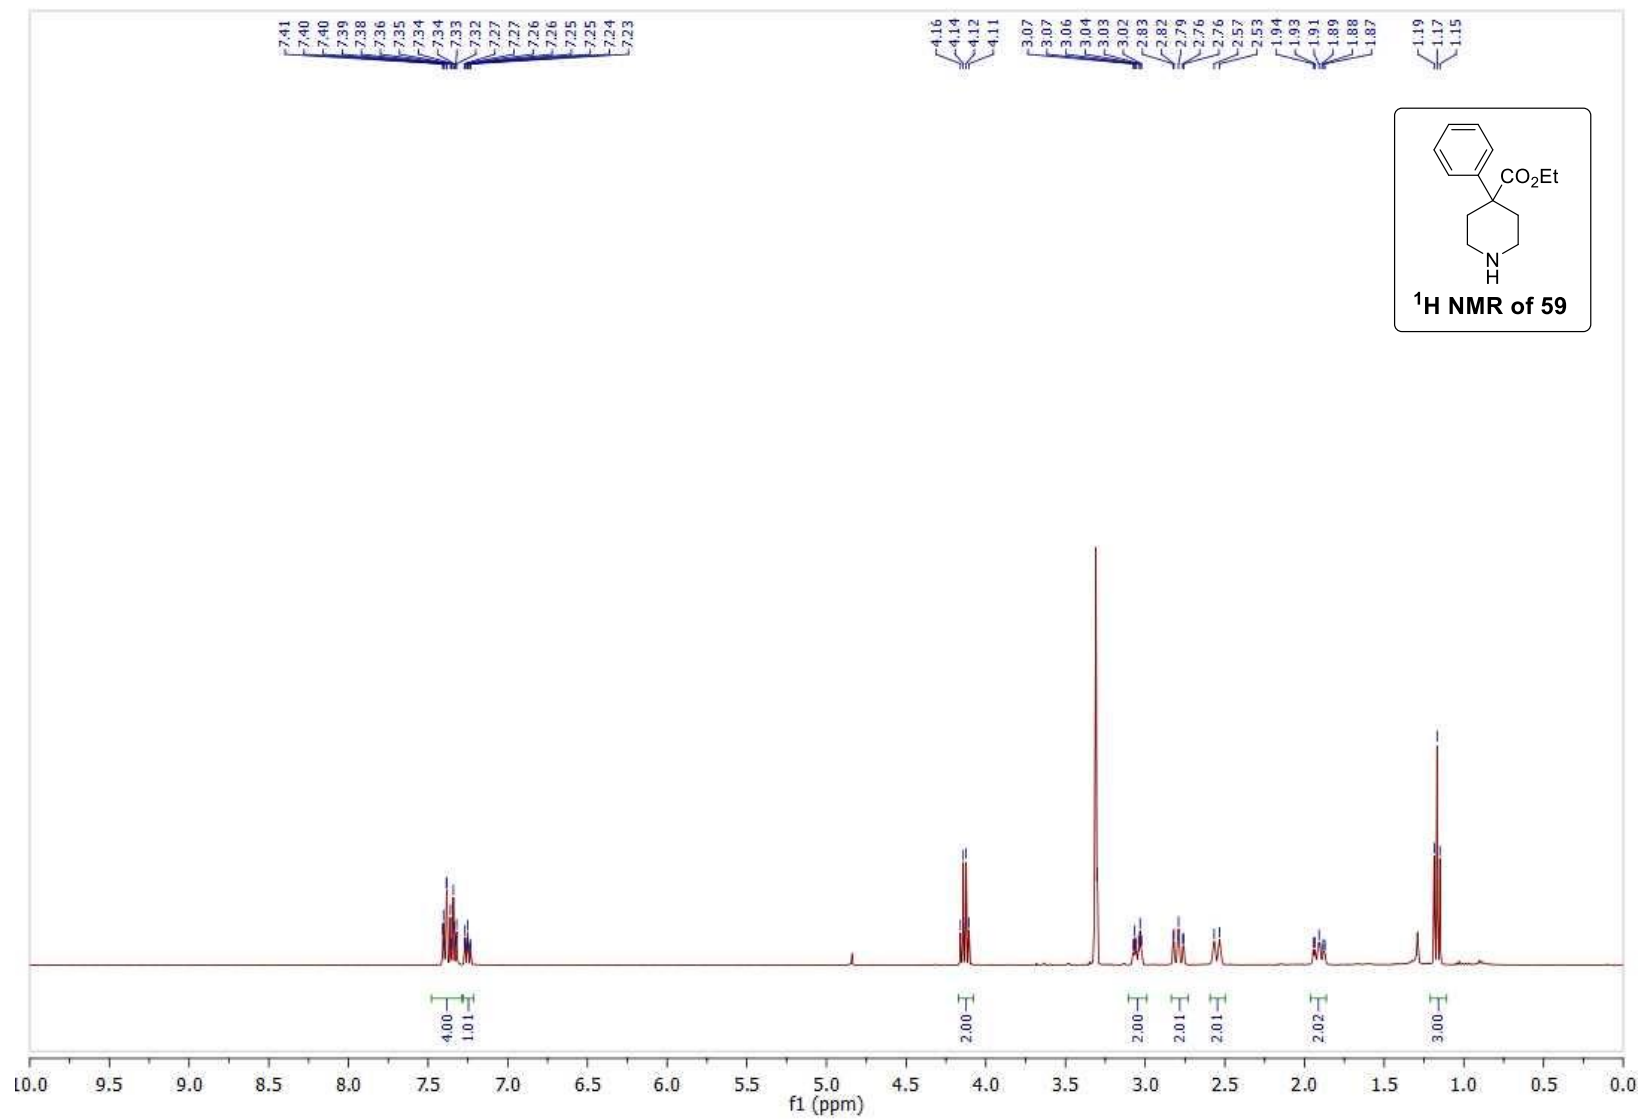

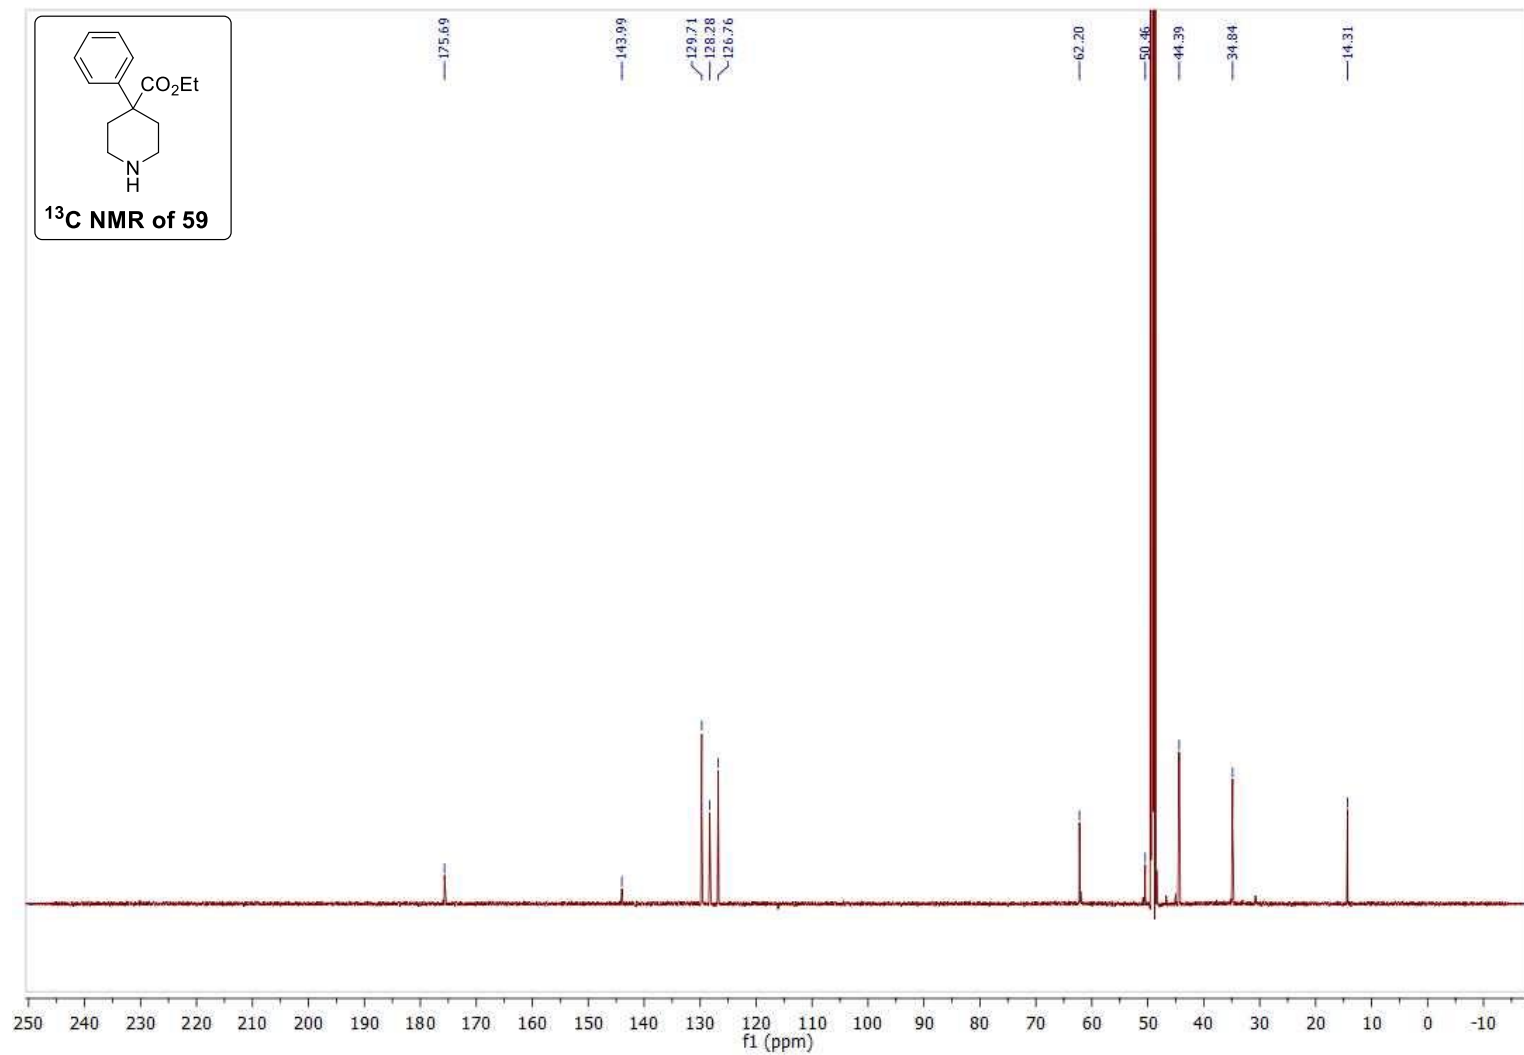



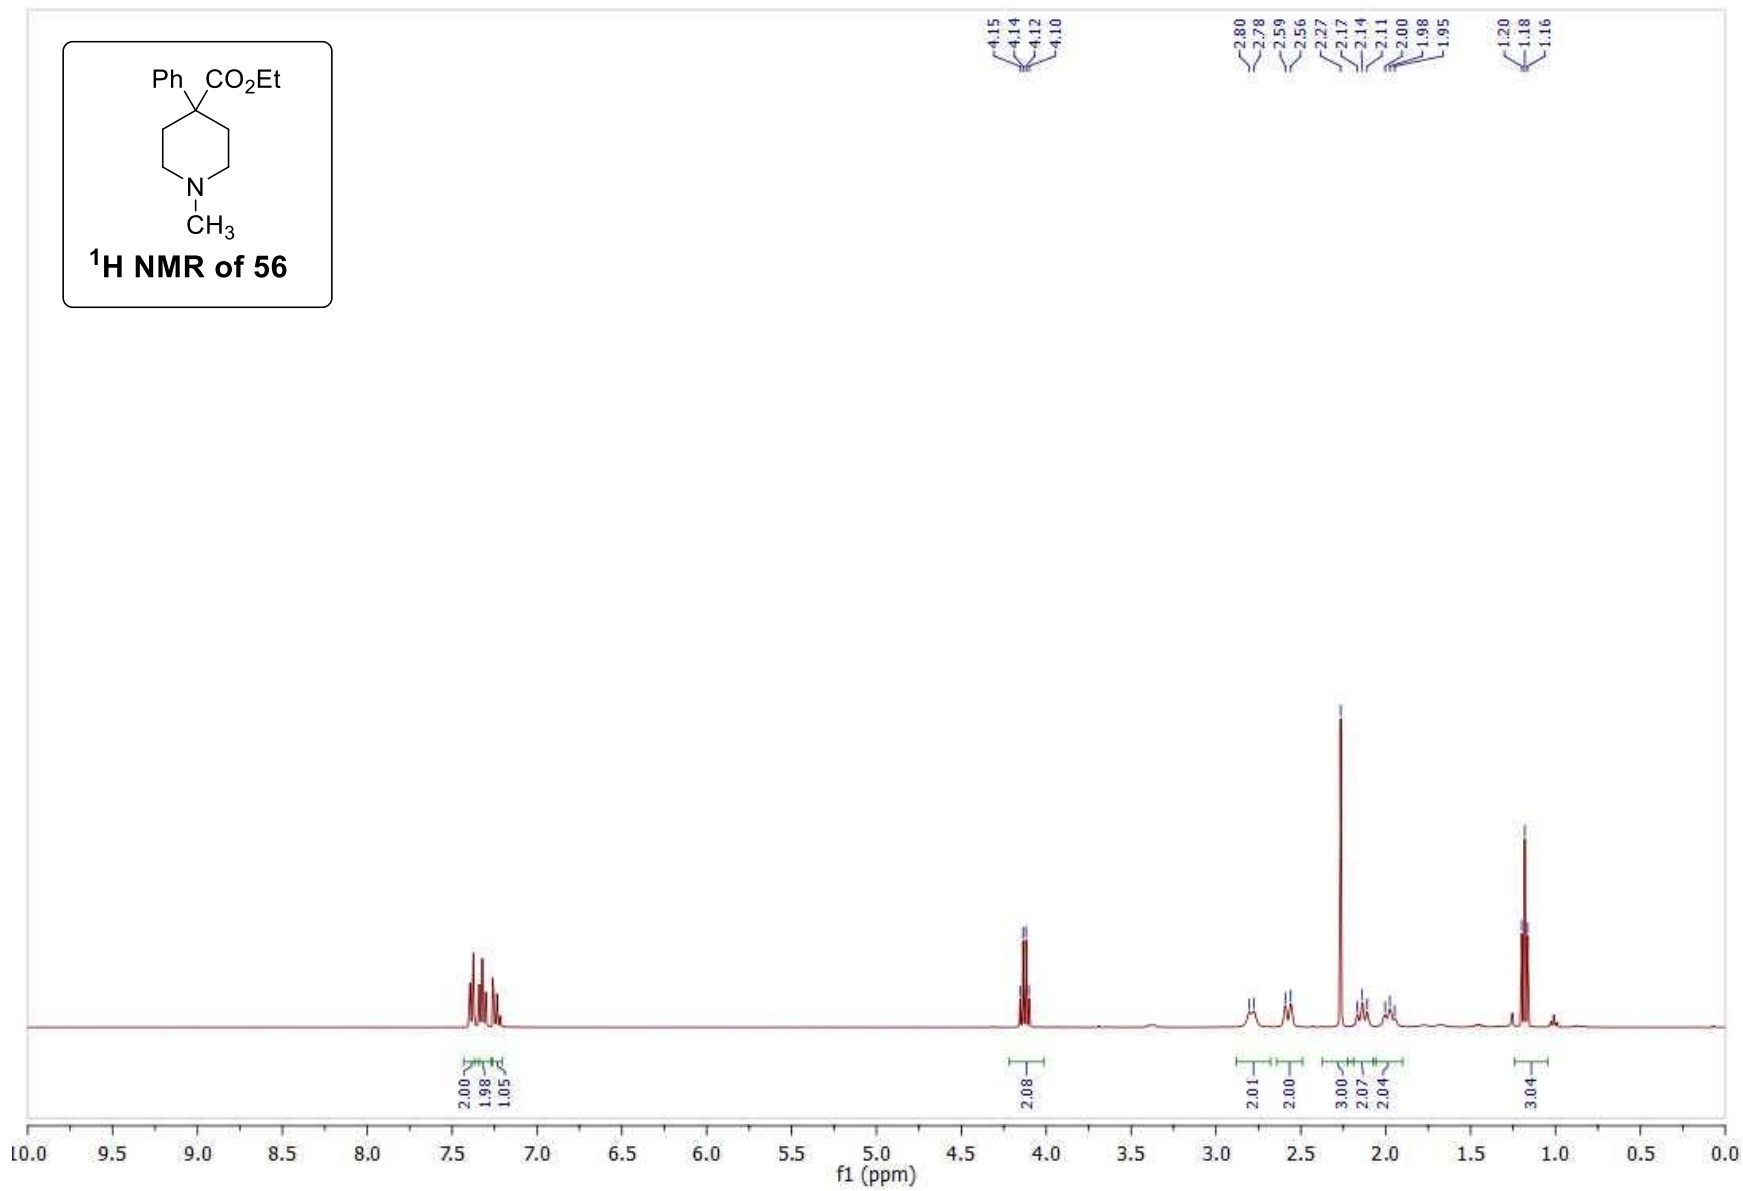

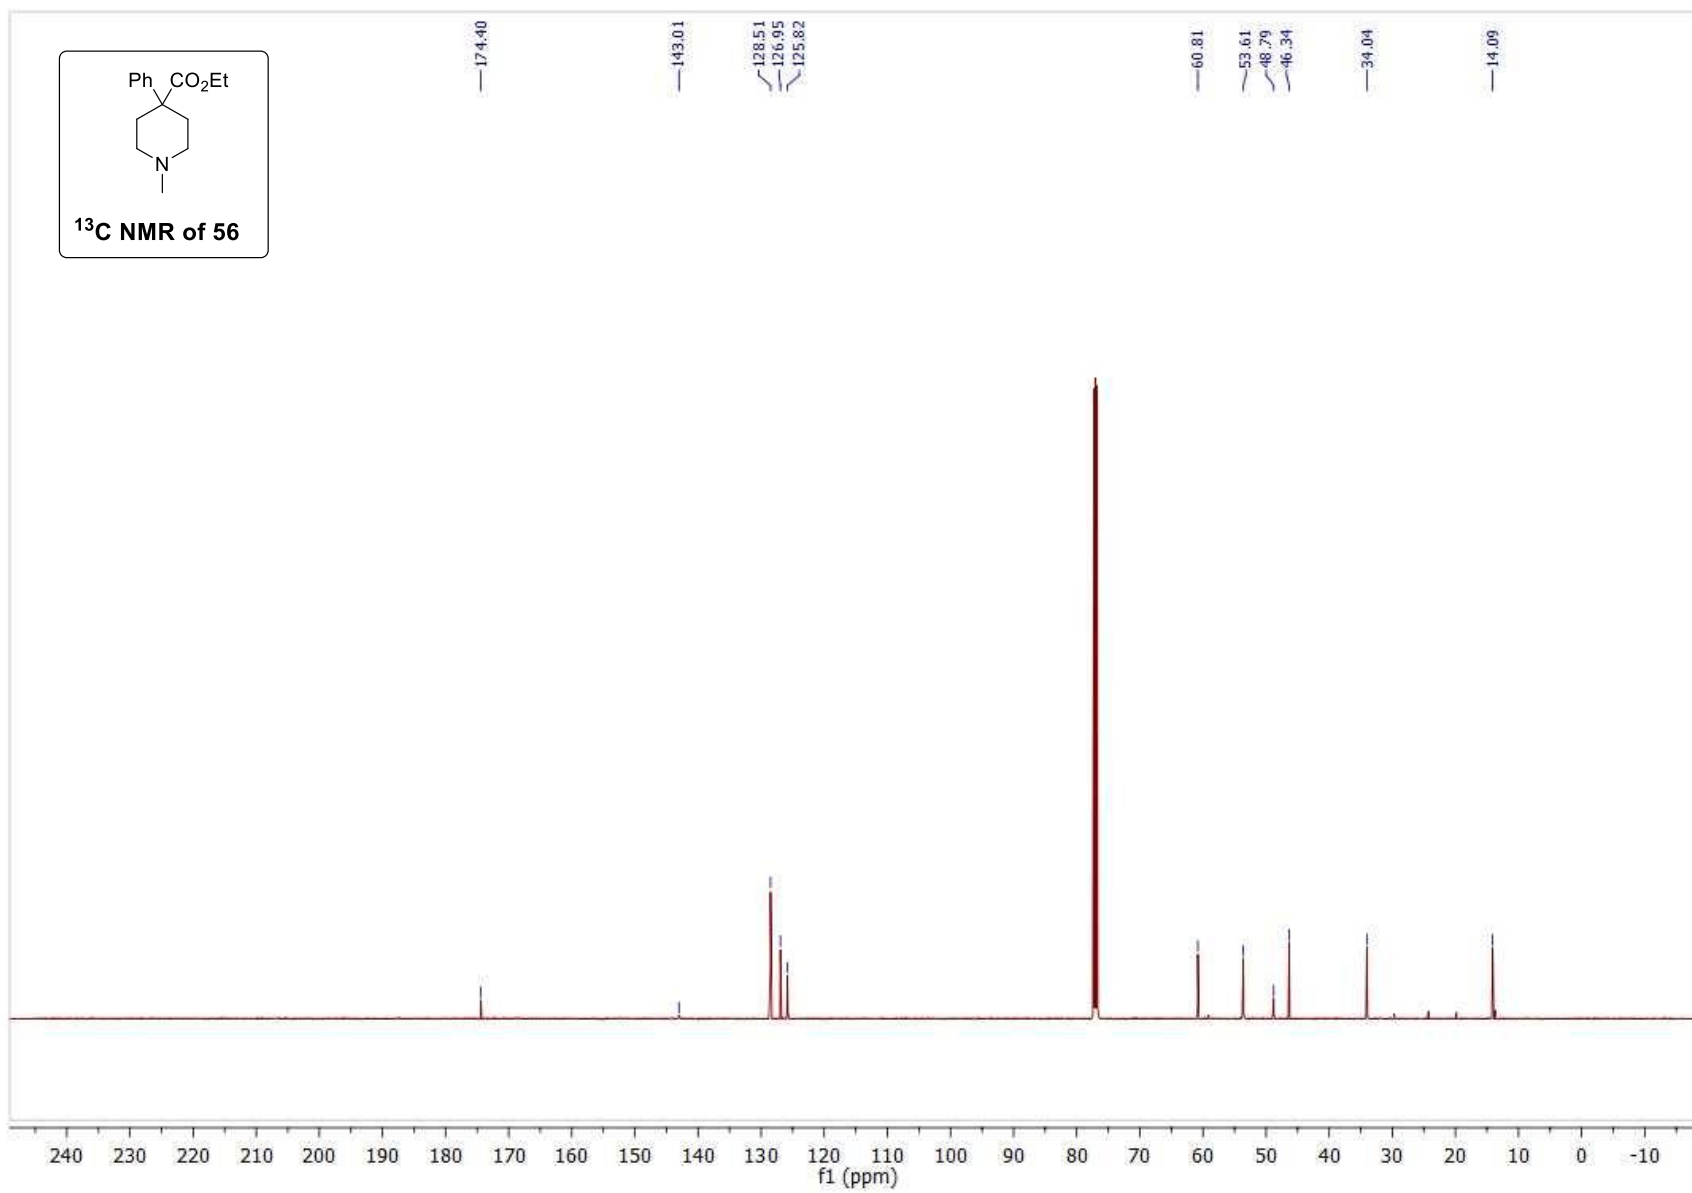

Supplement: d4gc05976j1.pdf [file d4gc05976j1.pdf]
